# Supplementary material for: Unprecedented chemoselective Ru(iii)-catalyzed [3 + 2] annulation of enaminones with iodonium ylides for the synthesis of functionalized 3a,7a-dihydroxy hexahydro-4H-indol-4-ones
Source: Royal Society of Chemistry journal article supplement (doi:10.1039/d3qo01276j), 2023-01-01
Supplement: d3qo01276j1.pdf [file d3qo01276j1.pdf]

# Unprecedented chemoselective Ru(III)-catalyzed [3+2] annulation of enaminones with iodonium ylides for the synthesis of functionalized 3a,7a-dihydroxy hexahydro-4*H*-indol-4-ones.

Mingshuai Zhang,<sup>a</sup> Longkun Chen,<sup>a</sup> Zhuoyuan Liu,<sup>a</sup> Jiuzhong Huang,<sup>\*b</sup> Fuchao Yu<sup>\*a</sup>

## Table of Contents

|                                                                                    |     |
|------------------------------------------------------------------------------------|-----|
| 1. General information. ....                                                       | 2   |
| 2. Optimization of reaction conditions. ....                                       | 3   |
| 3. General procedure. ....                                                         | 4   |
| 4. Spectroscopic data. ....                                                        | 11  |
| 5. X-ray Structure and Data <sup>3</sup> of <b>3i</b> (CCDC 2215066). ....         | 25  |
| 6. <sup>1</sup> H NMR and <sup>13</sup> C NMR spectra for spectroscopic data. .... | 26  |
| 7. References and notes. ....                                                      | 109 |

## 1. General information.

All compounds were fully characterized by spectroscopic data. The NMR spectra were recorded on a DRX600 ( $^1\text{H}$ : 600 MHz,  $^{13}\text{C}$ : 150 MHz), chemical shifts ( $\delta$ ) are expressed in ppm, and  $J$  values are given in Hz, and deuterated  $\text{CDCl}_3$  and  $\text{DMSO-}d_6$  were used as solvent. The reactions were monitored by thin layer chromatography (TLC) using silica gel GF<sub>254</sub>. The melting points were determined on XT-4A melting point apparatus and are uncorrected. HRMs were performed on an Agilent LC/MS TOF instrument.

All chemicals and solvents were used as received without further purification unless otherwise stated. Column chromatography was performed on silica gel (200–300 mesh).

Enaminones **1** were prepared according to the literature<sup>1</sup>, iodonium ylides **2** were prepared according to the literature<sup>2</sup>. Other reagents were purchased from Energy Chemical and Adamas-beta®.

## 2. Optimization of reaction conditions.

**Table S1.** Optimization of the cascade [3+2] cyclization reaction conditions.<sup>a,b</sup>

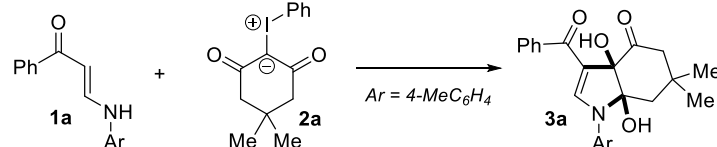

| Entry | Catalyst (mol%)                                    | Additive (eq.)                        | Solvent                         | T (°C) | Atmosphere       | Yield (%) |
|-------|----------------------------------------------------|---------------------------------------|---------------------------------|--------|------------------|-----------|
| 1     | [Cp* <i>RhCl</i> <sub>2</sub> ] <sub>2</sub> (2.5) | Ag <sub>2</sub> O (1.0)               | CH <sub>3</sub> NO <sub>2</sub> | 40     | Air              | 73        |
| 2     | [Cp* <i>RuCl</i> <sub>2</sub> ] <sub>2</sub> (2.5) | Ag <sub>2</sub> O (1.0)               | CH <sub>3</sub> NO <sub>2</sub> | 40     | Air              | 80        |
| 3     | [Cp* <i>IrCl</i> <sub>2</sub> ] <sub>2</sub> (2.5) | Ag <sub>2</sub> O (1.0)               | CH <sub>3</sub> NO <sub>2</sub> | 40     | Air              | 53        |
| 4     | [Cp* <i>RuCl</i> <sub>2</sub> ] <sub>2</sub> (2.5) | Ag <sub>2</sub> CO <sub>3</sub> (1.0) | CH <sub>3</sub> NO <sub>2</sub> | 40     | Air              | 70        |
| 5     | [Cp* <i>RuCl</i> <sub>2</sub> ] <sub>2</sub> (2.5) | AgBF <sub>4</sub> (1.0)               | CH <sub>3</sub> NO <sub>2</sub> | 40     | Air              | 56        |
| 6     | [Cp* <i>RuCl</i> <sub>2</sub> ] <sub>2</sub> (2.5) | AgSbF <sub>6</sub> (1.0)              | CH <sub>3</sub> NO <sub>2</sub> | 40     | Air              | 49        |
| 7     | [Cp* <i>RuCl</i> <sub>2</sub> ] <sub>2</sub> (2.5) | AgOTf (1.0)                           | CH <sub>3</sub> NO <sub>2</sub> | 40     | Air              | 48        |
| 8     | [Cp* <i>RuCl</i> <sub>2</sub> ] <sub>2</sub> (2.5) | AgOAc (1.0)                           | CH <sub>3</sub> NO <sub>2</sub> | 40     | Air              | 31        |
| 9     | [Cp* <i>RuCl</i> <sub>2</sub> ] <sub>2</sub> (2.5) | AgNO <sub>3</sub> (1.0)               | CH <sub>3</sub> NO <sub>2</sub> | 40     | Air              | 25        |
| 10    | [Cp* <i>RuCl</i> <sub>2</sub> ] <sub>2</sub> (2.5) | AgF (1.0)                             | CH <sub>3</sub> NO <sub>2</sub> | 40     | Air              | trace     |
| 11    | [Cp* <i>RuCl</i> <sub>2</sub> ] <sub>2</sub> (2.5) | AgTFA (1.0)                           | CH <sub>3</sub> NO <sub>2</sub> | 40     | Air              | n.d.      |
| 12    | [Cp* <i>RuCl</i> <sub>2</sub> ] <sub>2</sub> (2.5) | AgVO <sub>3</sub> (1.0)               | CH <sub>3</sub> NO <sub>2</sub> | 40     | Air              | trace     |
| 13    | [Cp* <i>RuCl</i> <sub>2</sub> ] <sub>2</sub> (2.5) | Ag <sub>2</sub> O (1.0)               | DCM                             | 40     | Air              | 47        |
| 14    | [Cp* <i>RuCl</i> <sub>2</sub> ] <sub>2</sub> (2.5) | Ag <sub>2</sub> O (1.0)               | EA                              | 40     | Air              | 44        |
| 15    | [Cp* <i>RuCl</i> <sub>2</sub> ] <sub>2</sub> (2.5) | Ag <sub>2</sub> O (1.0)               | Toluene                         | 40     | Air              | 32        |
| 16    | [Cp* <i>RuCl</i> <sub>2</sub> ] <sub>2</sub> (2.5) | Ag <sub>2</sub> O (1.0)               | DCE                             | 40     | Air              | 23        |
| 17    | [Cp* <i>RuCl</i> <sub>2</sub> ] <sub>2</sub> (2.5) | Ag <sub>2</sub> O (1.0)               | Acetone                         | 40     | Air              | 20        |
| 18    | [Cp* <i>RuCl</i> <sub>2</sub> ] <sub>2</sub> (2.5) | Ag <sub>2</sub> O (1.0)               | THF                             | 40     | Air              | n.r.      |
| 19    | [Cp* <i>RuCl</i> <sub>2</sub> ] <sub>2</sub> (2.5) | Ag <sub>2</sub> O (1.0)               | MeOH                            | 40     | Air              | n.d.      |
| 20    | [Cp* <i>RuCl</i> <sub>2</sub> ] <sub>2</sub> (2.5) | Ag <sub>2</sub> O (1.0)               | PhCl                            | 40     | Air              | trace     |
| 21    | [Cp* <i>RuCl</i> <sub>2</sub> ] <sub>2</sub> (2.5) | Ag <sub>2</sub> O (1.0)               | DMF                             | 40     | Air              | n.d.      |
| 22    | [Cp* <i>RuCl</i> <sub>2</sub> ] <sub>2</sub> (2.5) | Ag <sub>2</sub> O (1.0)               | PhCF <sub>3</sub>               | 40     | Air              | trace     |
| 23    | [Cp* <i>RuCl</i> <sub>2</sub> ] <sub>2</sub> (2.5) | Ag <sub>2</sub> O (1.0)               | CH <sub>3</sub> NO <sub>2</sub> | rt     | Air              | 68        |
| 24    | [Cp* <i>RuCl</i> <sub>2</sub> ] <sub>2</sub> (2.5) | Ag <sub>2</sub> O (1.0)               | CH <sub>3</sub> NO <sub>2</sub> | 60     | Air              | 66        |
| 25    | [Cp* <i>RuCl</i> <sub>2</sub> ] <sub>2</sub> (2.5) | Ag <sub>2</sub> O (1.0)               | CH <sub>3</sub> NO <sub>2</sub> | 80     | Air              | n.d.      |
| 26    | [Cp* <i>RuCl</i> <sub>2</sub> ] <sub>2</sub> (2.5) | Ag <sub>2</sub> O (1.0)               | CH <sub>3</sub> NO <sub>2</sub> | 40     | O <sub>2</sub>   | 74        |
| 27    | [Cp* <i>RuCl</i> <sub>2</sub> ] <sub>2</sub> (2.5) | Ag <sub>2</sub> O (1.0)               | CH <sub>3</sub> NO <sub>2</sub> | 40     | N <sub>2</sub>   | 70        |
| 28    | [Cp* <i>RuCl</i> <sub>2</sub> ] <sub>2</sub> (2.5) | Ag <sub>2</sub> O (1.0)               | CH <sub>3</sub> NO <sub>2</sub> | 40     | 4A MS            | 53        |
| 29    | [Cp* <i>RuCl</i> <sub>2</sub> ] <sub>2</sub> (2.5) | Ag <sub>2</sub> O (1.0)               | CH <sub>3</sub> NO <sub>2</sub> | 40     | H <sub>2</sub> O | 78        |
| 30    | [Cp* <i>RuCl</i> <sub>2</sub> ] <sub>2</sub> (2.5) | Ag <sub>2</sub> O (0.8)               | CH <sub>3</sub> NO <sub>2</sub> | 40     | Air              | 77        |
| 31    | [Cp* <i>RuCl</i> <sub>2</sub> ] <sub>2</sub> (2.5) | Ag <sub>2</sub> O (1.0)               | CH <sub>3</sub> NO <sub>2</sub> | 40     | Air              | 80        |
| 32    | [Cp* <i>RuCl</i> <sub>2</sub> ] <sub>2</sub> (2.5) | Ag <sub>2</sub> O (1.5)               | CH <sub>3</sub> NO <sub>2</sub> | 40     | Air              | 84        |
| 33    | [Cp* <i>RuCl</i> <sub>2</sub> ] <sub>2</sub> (2.5) | Ag <sub>2</sub> O (2)                 | CH <sub>3</sub> NO <sub>2</sub> | 40     | Air              | 82        |
| 34    | [Cp* <i>RuCl</i> <sub>2</sub> ] <sub>2</sub> (1.5) | Ag <sub>2</sub> O (1.5)               | CH <sub>3</sub> NO <sub>2</sub> | 40     | Air              | 76        |
| 35    | [Cp* <i>RuCl</i> <sub>2</sub> ] <sub>2</sub> (2.0) | Ag <sub>2</sub> O (1.5)               | CH <sub>3</sub> NO <sub>2</sub> | 40     | Air              | 84        |
| 36    | [Cp* <i>RuCl</i> <sub>2</sub> ] <sub>2</sub> (3)   | Ag <sub>2</sub> O (1.5)               | CH <sub>3</sub> NO <sub>2</sub> | 40     | Air              | 82        |
| 37    | -                                                  | Ag <sub>2</sub> O (1.5)               | CH <sub>3</sub> NO <sub>2</sub> | 40     | Air              | 18        |
| 38    | [Cp* <i>RuCl</i> <sub>2</sub> ] <sub>2</sub> (2.5) | -                                     | CH <sub>3</sub> NO <sub>2</sub> | 40     | Air              | 23        |

<sup>a</sup>Reaction conditions: **1a** (0.5 mmol), **2a** (1 mmol), catalyst and catalyst in 2 ml of solvent for 12h. <sup>b</sup>Isolated yield.

### 3. General procedure.

#### 3.1 Synthesis of 3a,7a-dihydroxy indoles **3**.

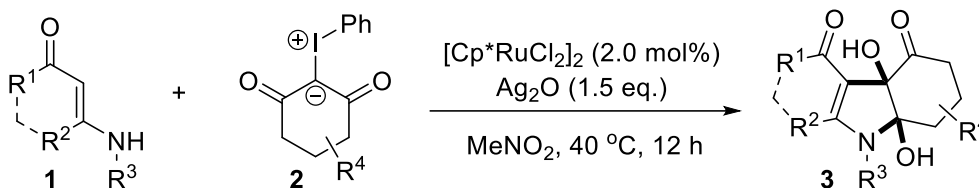

Enaminones **1** (0.5 mmol), iodonium ylides **2** (1.0 mmol),  $[\text{Cp}^*\text{RuCl}_2]_2$  (2.0 mol%),  $\text{Ag}_2\text{O}$  (0.75 mmol) and  $\text{MeNO}_2$  (2.0 mL) were charged into a 10 mL Ace Glass pressure tubes, and the mixture was stirred at 40 °C for 12.0 h until enaminones were completely consumed. The mixture was cooled to room temperature, and then EtOAc (15 mL  $\times$  2) were added. The organic phase was washed with water (10 mL), dried over  $\text{Na}_2\text{SO}_4$ , concentrated and purified by flash column chromatography to afford 3a,7a-dihydroxy indoles **3**.

#### 3.2 Gram-scale synthesis of 3a,7a-dihydroxy indole **3w**.

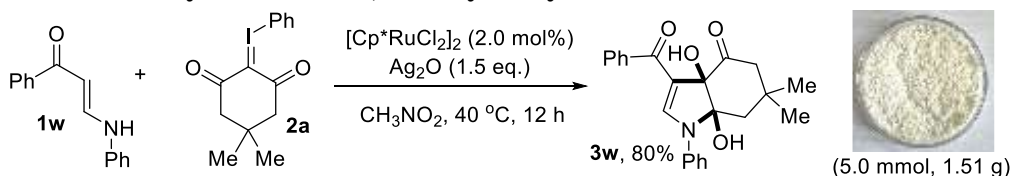

Enaminone **1w** (5 mmol), iodonium ylide **2a** (10 mmol),  $[\text{Cp}^*\text{RuCl}_2]_2$  (2.0 mol%),  $\text{Ag}_2\text{O}$  (7.5 mmol) and  $\text{MeNO}_2$  (20 mL) were charged into a 100 mL Ace Glass pressure tubes, and the mixture was stirred at 40 °C for 12.0 h until enaminone were completely consumed. The mixture was cooled to room temperature, and then EtOAc (15 mL  $\times$  2) were added. The organic phase was washed with water (10 mL), dried over  $\text{Na}_2\text{SO}_4$ , concentrated and purified by flash column chromatography to afford 3a,7a-dihydroxy indole **3w**.

#### 3.3 Further transformations for the construction of 1H-pyrrol-3-ol carboxylate derivatives.

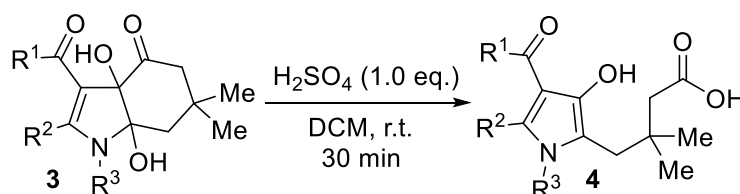

3a,7a-Dihydroxy indoles **3** (0.2 mmol), concentrated sulfuric acid (0.2 mmol,  $\omega$  95%), and DCM (2.0 mL) were charged into a 10 mL Ace Glass pressure tubes, and the mixture was stirred at room temperature for 20~30 min until **3** were completely consumed. The mixture was cooled to room temperature, and then EtOAc (15 mL  $\times$  2)

were added. The organic phase was washed with water (10 mL), dried over Na<sub>2</sub>SO<sub>4</sub>, concentrated and purified by flash column chromatography to afford 1*H*-pyrrol-3-ol carboxylate derivatives **4a-4c**.

### 3.4 H/D Exchange experiment.

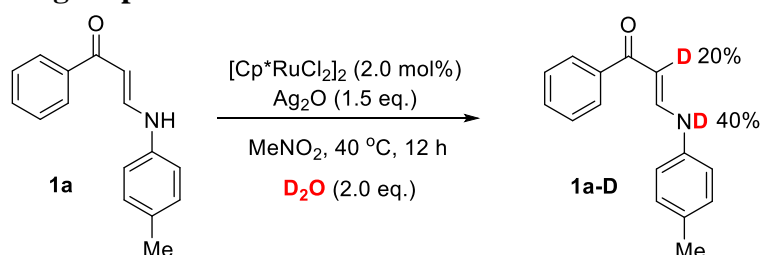

Enaminone **1a** (0.5 mmol), [Cp\**Ru*Cl<sub>2</sub>]<sub>2</sub> (2.0 mol%), Ag<sub>2</sub>O (0.75 mmol), MeNO<sub>2</sub> (2.0 mL) and D<sub>2</sub>O (1.0 mmol) were charged into a 10 mL Ace Glass pressure tubes, and the mixture was stirred at 40 °C for 12.0 h until enaminones were completely consumed. The mixture was cooled to room temperature, and then EtOAc (15 mL × 2) were added. The organic phase was washed with water (10 mL), dried over Na<sub>2</sub>SO<sub>4</sub>, concentrated and purified by flash column chromatography to afford enaminone **1a/1a-D**.

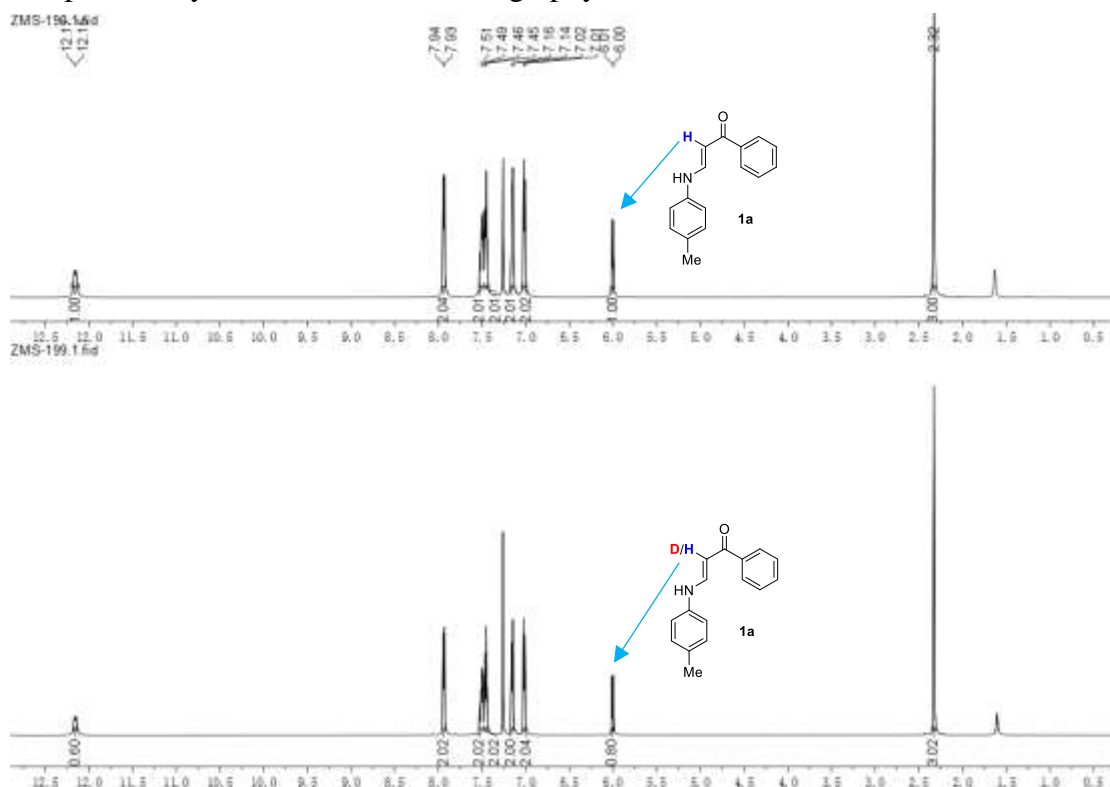

### 3.5 <sup>18</sup>O labeling experiment.

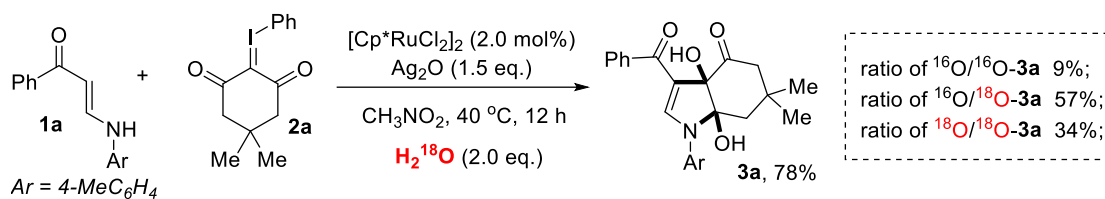

Enaminone **1a** (0.25 mmol), iodonium ylide **2a** (0.5 mmol),  $[\text{Cp}^*\text{RuCl}_2]_2$  (2.0 mol%),  $\text{Ag}_2\text{O}$  (0.37 mmol),  $\text{H}_2^{18}\text{O}$  (0.5 mmol) and  $\text{MeNO}_2$  (2.0 mL) were charged into a 10 mL Ace Glass pressure tubes, and the mixture was stirred at 40 °C for 12.0 h until enaminone were completely consumed. The mixture was cooled to room temperature, and then  $\text{EtOAc}$  (15 mL  $\times$  2) were added. The organic phase was washed with water (10 mL), dried over  $\text{Na}_2\text{SO}_4$ , concentrated and purified by flash column chromatography to afford 3a,7a-dihydroxy indole **3a**. The  $^{18}\text{O}$  content in the structure was identified by HRMS.

#### Peak List

| <i>m/z</i> | <i>z</i> | Abund     |
|------------|----------|-----------|
| 392.1861   | 1        | 259058.2  |
| 393.1888   | 1        | 70692.09  |
| 394.1897   | 1        | 1593049.5 |
| 395.1937   | 1        | 463857.13 |
| 396.1945   | 1        | 954661.19 |

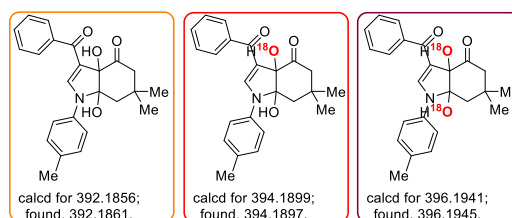

### 3.6 The mechanistic investigation.

With regard to standard conditions, the intermediate **V** in the Scheme 4 was successfully detected by HRMS during the crude reaction mixture.

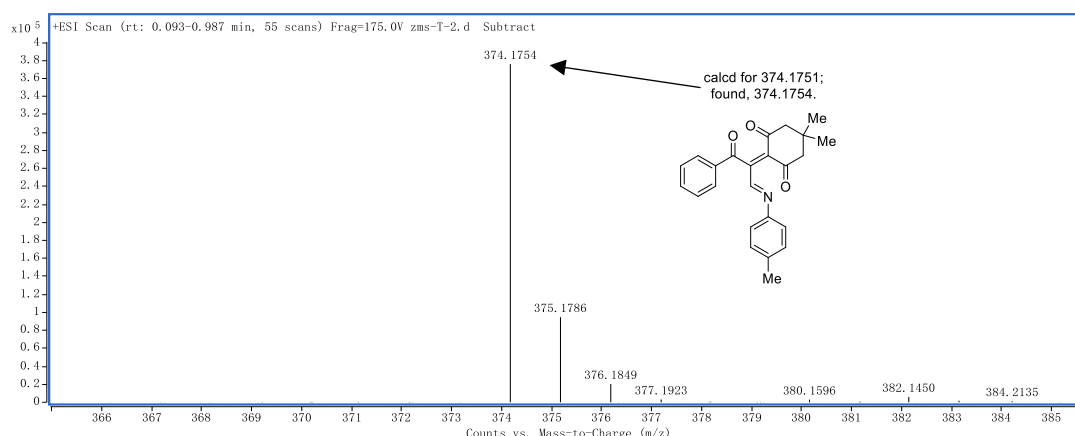

#### 4. Spectroscopic data.

##### 3-Benzoyl-3a,7a-dihydroxy-6,6-dimethyl-1-(*p*-tolyl)-1,3a,5,6,7,7a-hexahydro-4*H*-indol-4-one (3a)

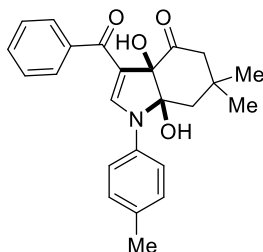

$V_{\text{Petroleum ether}}/V_{\text{Ethyl acetate}} = 1:2$ ,  $R_f = 0.2$ ; White solid: 165 mg (84%); mp = 147–148 °C;  $^1\text{H NMR}$  (600 MHz,  $\text{DMSO-}d_6$ )  $\delta = 7.67\text{--}7.65$  (m, 3H, ArH+C=CH), 7.52–7.46 (m, 3H, ArH), 7.35–7.33 (m, 2H, ArH), 7.15–7.13 (m, 2H, ArH), 6.43 (s, 1H, OH), 5.56 (s, 1H, OH), 2.61 (s, 1H,  $\text{CH}_2$ ), 2.27 (s, 3H, Ar $\text{CH}_3$ ), 2.16–1.90 (m, 3H,  $\text{CH}_2$ ), 0.98 (s, 3H,  $\text{CCH}_3$ ), 0.84 (s, 3H,  $\text{CCH}_3$ );  $^{13}\text{C NMR}$  (150 MHz,  $\text{DMSO-}d_6$ )  $\delta = 206.6, 187.5, 150.3, 139.9, 136.5, 134.4, 131.2, 129.9, 129.9, 128.8, 128.1, 128.6, 128.6, 121.9, 121.9, 118.5, 102.9, 83.5, 51.3, 48.1, 35.4, 32.0, 25.7, 20.9$ ; HRMS (TOF ES<sup>+</sup>): m/z calcd for  $\text{C}_{24}\text{H}_{26}\text{NO}_4$  [(M+H)<sup>+</sup>], 392.1856, found, 392.1861.

##### 3a,7a-Dihydroxy-3-(4-methoxybenzoyl)-6,6-dimethyl-1-(*p*-tolyl)-1,3a,5,6,7,7a-hexahydro-4*H*-indol-4-one (3b)

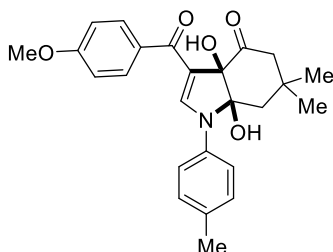

$V_{\text{Petroleum ether}}/V_{\text{Ethyl acetate}} = 1:2$ ,  $R_f = 0.2$ ; Yellow solid: 173 mg (82%); mp = 97–98 °C;  $^1\text{H NMR}$  (600 MHz,  $\text{DMSO-}d_6$ )  $\delta = 7.69$  (d,  $J = 7.4$  Hz, 2H, ArH), 7.67 (s, 1H, C=CH), 7.36 (d,  $J = 8.0$  Hz, 2H, ArH), 7.15 (d,  $J = 8.0$  Hz, 2H, ArH), 7.00 (d,  $J = 8.2$  Hz, 2H, ArH), 6.39 (s, 1H, OH), 5.52 (s, 1H, OH), 3.82 (s, 3H, ArOCH<sub>3</sub>), 2.61 (d,  $J = 11.8$  Hz, 1H,  $\text{CH}_2$ ), 2.28 (s, 3H, Ar $\text{CH}_3$ ), 2.15 (d,  $J = 11.9$  Hz, 1H,  $\text{CH}_2$ ), 2.04 (d,  $J = 14.3$  Hz, 1H,  $\text{CH}_2$ ), 1.90 (d,  $J = 14.3$  Hz, 1H,  $\text{CH}_2$ ), 0.98 (s, 3H,  $\text{CCH}_3$ ), 0.84 (s, 3H,  $\text{CCH}_3$ );  $^{13}\text{C NMR}$  (150 MHz,  $\text{DMSO-}d_6$ )  $\delta = 206.7, 186.5, 161.9, 149.5, 136.7, 134.2, 132.3, 130.7, 130.7, 129.9, 129.9, 121.7, 121.7, 118.6, 114.0, 114.0, 102.7, 83.7, 55.8, 51.3, 48.0, 35.4, 32.1, 25.7, 20.9$ ; HRMS (TOF ES<sup>+</sup>): m/z calcd for  $\text{C}_{25}\text{H}_{28}\text{NO}_5$  [(M+H)<sup>+</sup>], 422.1962, found, 422.1965.

##### 3a,7a-Dihydroxy-6,6-dimethyl-3-(4-methylbenzoyl)-1-(*p*-tolyl)-1,3a,5,6,7,7a-hexahydro-4*H*-indol-4-one (3c)

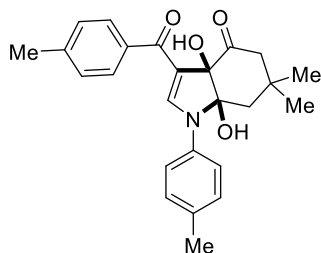

$V_{\text{Petroleum ether}}/V_{\text{Ethyl acetate}} = 1:2$ ,  $R_f = 0.2$ ; White solid: 166 mg (81%); mp = 179–180 °C;  $^1\text{H NMR}$  (600 MHz,  $\text{DMSO-}d_6$ )  $\delta = 7.66$  (s, 1H, C=CH), 7.57 (d,  $J = 7.4$  Hz, 2H, ArH), 7.33 (d,  $J = 7.5$  Hz, 2H, ArH), 7.27 (d,  $J = 7.6$  Hz, 2H, ArH), 7.15 (d,  $J = 7.9$  Hz, 2H, ArH), 6.42 (s, 1H, OH), 5.54 (s, 1H, OH), 2.61 (d,  $J = 11.3$  Hz, 1H,  $\text{CH}_2$ ), 2.36 (s, 3H, Ar $\text{CH}_3$ ), 2.27 (s, 3H, Ar $\text{CH}_3$ ), 2.15 (d,  $J = 12.1$  Hz, 1H,  $\text{CH}_2$ ), 2.05 (d,  $J = 14.0$  Hz, 1H,  $\text{CH}_2$ ), 1.91 (d,  $J = 14.3$  Hz, 1H,  $\text{CH}_2$ ), 0.98 (s, 3H,  $\text{CCH}_3$ ), 0.84 (s, 3H,  $\text{CCH}_3$ );  $^{13}\text{C NMR}$  (150 MHz,  $\text{DMSO-}d_6$ )  $\delta = 206.7$ , 187.4, 145.0, 141.2, 137.2, 136.6, 134.4, 129.9, 129.9, 129.4, 129.4, 128.7, 128.7, 121.8, 121.8, 118.5, 102.8, 83.6, 51.2, 48.1, 35.4, 32.0, 25.7, 21.5, 20.9; HRMS (TOF ES $^+$ ):  $m/z$  calcd for  $\text{C}_{25}\text{H}_{28}\text{NO}_4$  [(M+H) $^+$ ], 406.2013, found, 406.2018.

### 3-(4-Ethylbenzoyl)-3a,7a-dihydroxy-6,6-dimethyl-1-(p-tolyl)-1,3a,5,6,7,7a-hexahydro-4H-indol-4-one (3d)

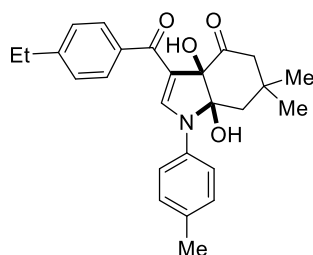

$V_{\text{Petroleum ether}}/V_{\text{Ethyl acetate}} = 1:2$ ,  $R_f = 0.2$ ; White solid: 166 mg (79%); mp = 157–158 °C;  $^1\text{H NMR}$  (600 MHz,  $\text{DMSO-}d_6$ )  $\delta = 7.68$  (s, 1H, C=CH), 7.60 (d,  $J = 7.8$  Hz, 2H, ArH), 7.35 (d,  $J = 8.1$  Hz, 2H, ArH), 7.30 (d,  $J = 7.8$  Hz, 2H, ArH), 7.15 (d,  $J = 8.0$  Hz, 2H, ArH), 6.41 (s, 1H, OH), 5.54 (s, 1H, OH), 2.66 (q,  $J = 7.6$  Hz, 2H,  $\text{CH}_2$ ), 2.61 (d,  $J = 11.9$  Hz, 1H,  $\text{CH}_2$ ), 2.27 (s, 3H, Ar $\text{CH}_3$ ), 2.15 (d,  $J = 11.8$  Hz, 1H,  $\text{CH}_2$ ), 2.05 (d,  $J = 14.1$  Hz, 1H,  $\text{CH}_2$ ), 1.91 (d,  $J = 14.1$  Hz, 1H,  $\text{CH}_2$ ), 1.20 (t,  $J = 7.7$  Hz, 3H,  $\text{CCH}_3$ ), 0.98 (s, 3H,  $\text{CCH}_3$ ), 0.84 (s, 3H,  $\text{CCH}_3$ );  $^{13}\text{C NMR}$  (150 MHz,  $\text{DMSO-}d_6$ )  $\delta = 206.7$ , 187.3, 149.9, 147.3, 137.4, 136.6, 134.3, 129.9, 129.9, 128.8, 128.8, 128.2, 128.2, 121.8, 121.8, 118.6, 102.8, 83.6, 51.3, 48.1, 35.4, 32.1, 28.5, 25.7, 20.9, 15.9; HRMS (TOF ES $^+$ ):  $m/z$  calcd for  $\text{C}_{26}\text{H}_{30}\text{NO}_4$  [(M+H) $^+$ ], 420.2169, found, 420.2174.

### 3-(4-(Dimethylamino)benzoyl)-3a,7a-dihydroxy-6,6-dimethyl-1-(p-tolyl)-1,3a,5,6,7,7a-hexahydro-4H-indol-4-one (3e)

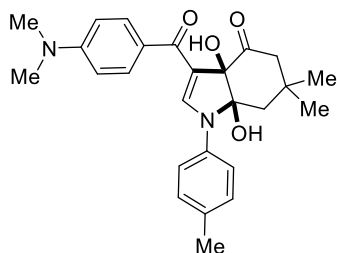



$V_{\text{Petroleum ether}}/V_{\text{Ethyl acetate}} = 2:1$ ,  $R_f = 0.2$ ; Yellow solid: 152 mg (70%); mp = 169–170 °C;  $^1\text{H NMR}$  (600 MHz,  $\text{DMSO-}d_6$ )  $\delta = 7.65$  (s, 1H, C=CH), 7.58 (d,  $J = 8.3$  Hz, 2H, ArH), 7.33 (d,  $J = 8.0$  Hz, 2H, ArH), 7.14 (d,  $J = 8.0$  Hz, 2H, ArH), 6.72 (d,  $J = 8.5$  Hz, 2H, ArH), 6.32 (s, 1H, OH), 5.43 (s, 1H, OH), 2.97 (s, 6H,  $\text{NCH}_3$ ), 2.60 (d,  $J = 11.8$  Hz, 1H,  $\text{CH}_2$ ), 2.27 (s, 3H,  $\text{ArCH}_3$ ), 2.14 (d,  $J = 11.6$  Hz, 1H,  $\text{CH}_2$ ), 2.02 (d,  $J = 14.2$  Hz, 1H,  $\text{CH}_2$ ), 1.85 (d,  $J = 14.1$  Hz, 1H,  $\text{CH}_2$ ), 0.96 (s, 3H,  $\text{CCH}_3$ ), 0.83 (s, 3H,  $\text{CCH}_3$ );  $^{13}\text{C NMR}$  (150 MHz,  $\text{DMSO-}d_6$ )  $\delta = 206.8, 186.3, 152.7, 148.1, 137.0, 133.9, 130.5, 130.5, 129.9, 129.9, 126.8, 121.4, 121.4, 118.8, 111.4, 111.4, 102.3, 83.9, 51.3, 48.0, 40.2, 40.2, 35.3, 32.1, 25.7, 20.9$ ; HRMS (TOF ES+):  $m/z$  calcd for  $\text{C}_{26}\text{H}_{31}\text{N}_2\text{O}_4$  [(M+H)<sup>+</sup>], 435.2278, found, 435.2280.

**3-(4-Fluorobenzoyl)-3a,7a-dihydroxy-6,6-dimethyl-1-(p-tolyl)-1,3a,5,6,7,7a-hexahydro-4H-indol-4-one (3f)**

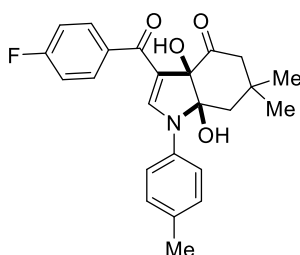

$V_{\text{Petroleum ether}}/V_{\text{Ethyl acetate}} = 1:2$ ,  $R_f = 0.2$ ; White solid: 161 mg (78%); mp = 142–143 °C;  $^1\text{H NMR}$  (600 MHz,  $\text{DMSO-}d_6$ )  $\delta = 7.76$ – $7.73$  (m, 2H, ArH), 7.71 (s, 1H, C=CH), 7.36 (d,  $J = 8.1$  Hz, 2H, ArH), 7.27 (t,  $J = 8.7$  Hz, 2H, ArH), 7.15 (d,  $J = 8.0$  Hz, 2H, ArH), 6.44 (s, 1H, OH), 5.56 (s, 1H, OH), 2.62 (d,  $J = 11.8$  Hz, 1H,  $\text{CH}_2$ ), 2.27 (s, 3H,  $\text{ArCH}_3$ ), 2.14 (d,  $J = 11.6$  Hz, 1H,  $\text{CH}_2$ ), 2.05 (d,  $J = 14.2$  Hz, 1H,  $\text{CH}_2$ ), 1.93 (d,  $J = 14.1$  Hz, 1H,  $\text{CH}_2$ ), 0.98 (s, 3H,  $\text{CCH}_3$ ), 0.84 (s, 3H,  $\text{CCH}_3$ );  $^{13}\text{C NMR}$  (150 MHz,  $\text{DMSO-}d_6$ )  $\delta = 206.6, 186.2, 164.0$  (C–F,  $J = 247.8$  Hz), 150.5, 136.4 (C–F,  $J = 4.5$  Hz), 134.5, 131.2 (C–F,  $J = 8.9$  Hz), 131.2 (C–F,  $J = 8.9$  Hz), 129.9, 129.9, 121.9, 121.9, 118.3, 115.7 (C–F,  $J = 21.5$  Hz), 115.7 (C–F,  $J = 21.5$  Hz), 102.9, 83.5, 51.2, 48.0, 35.4, 32.0, 25.7, 20.9; HRMS (TOF ES+):  $m/z$  calcd for  $\text{C}_{24}\text{H}_{25}\text{FNO}_4$  [(M+H)<sup>+</sup>], 410.1762, found, 410.1765.

**3-(4-Bromobenzoyl)-3a,7a-dihydroxy-6,6-dimethyl-1-(p-tolyl)-1,3a,5,6,7,7a-hexahydro-4H-indol-4-one (3g)**

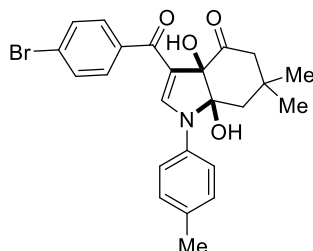

$V_{\text{Petroleum ether}}/V_{\text{Ethyl acetate}} = 1:1$ ,  $R_f = 0.2$ ; Yellow solid: 189 mg (80%); mp = 157–158 °C;  $^1\text{H NMR}$  (600 MHz,  $\text{DMSO-}d_6$ )  $\delta = 7.73$  (s, 1H, C=CH), 7.67–7.59 (m, 4H, ArH), 7.36 (d,  $J = 7.8$  Hz, 2H, ArH), 7.15 (d,  $J = 8.1$  Hz, 2H, ArH), 6.45 (s, 1H, OH), 5.58 (s, 1H, OH), 2.62 (d,  $J = 11.7$  Hz, 1H,  $\text{CH}_2$ ), 2.27 (s, 3H,  $\text{ArCH}_3$ ), 2.14 (d,  $J = 12.0$  Hz, 1H,  $\text{CH}_2$ ), 2.06 (d,  $J = 14.3$  Hz, 1H,  $\text{CH}_2$ ), 1.93 (d,  $J = 14.2$  Hz, 1H,  $\text{CH}_2$ ), 0.98 (s, 3H,  $\text{CCH}_3$ ), 0.84 (s, 3H,  $\text{CCH}_3$ );  $^{13}\text{C NMR}$  (150 MHz,  $\text{DMSO-}d_6$ )  $\delta = 206.6, 186.3, 150.7, 139.0, 136.4, 134.6, 131.8, 131.8, 130.7, 130.7, 129.9, 129.9, 124.7, 121.9$ ,

121.9, 118.2, 103.0, 83.4, 51.2, 48.1, 35.4, 32.0, 25.7, 20.9; HRMS (TOF ES<sup>+</sup>): *m/z* calcd for C<sub>24</sub>H<sub>25</sub>BrNO<sub>4</sub> [(M+H)<sup>+</sup>], 470.0961, found, 470.0967.

**3a,7a-Dihydroxy-6,6-dimethyl-1-(*p*-tolyl)-3-(4-(trifluoromethyl)benzoyl)-1,3a,5,6,7,7a-hexahydro-4*H*-indol-4-one (3h)**

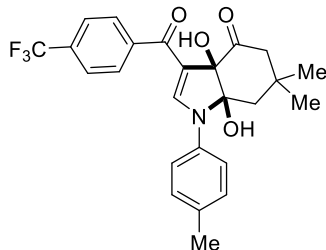

V<sub>Petroleum ether</sub>/V<sub>Ethyl acetate</sub> = 1:2, R<sub>f</sub> = 0.2; Yellow solid: 177 mg (77%); mp = 188–189 °C; <sup>1</sup>H NMR (600 MHz, DMSO-*d*<sub>6</sub>) δ = 7.86 (d, *J* = 8.0 Hz, 2H, ArH), 7.82 (d, *J* = 8.1 Hz, 2H, ArH), 7.78 (s, 1H, C=CH), 7.38 (d, *J* = 8.3 Hz, 2H, ArH), 7.16 (d, *J* = 8.0 Hz, 2H, ArH), 6.49 (s, 1H, OH), 5.65 (s, 1H, OH), 2.65 (d, *J* = 11.8 Hz, 1H, CH<sub>2</sub>), 2.28 (s, 3H, ArCH<sub>3</sub>), 2.16 (d, *J* = 11.8 Hz, 1H, CH<sub>2</sub>), 2.08 (d, *J* = 14.3 Hz, 1H, CH<sub>2</sub>), 1.97 (t, *J* = 14.9 Hz, 1H, CH<sub>2</sub>), 1.00 (s, 3H, CCH<sub>3</sub>), 0.85 (s, 3H, CCH<sub>3</sub>); <sup>13</sup>C NMR (150 MHz, DMSO-*d*<sub>6</sub>) δ = 206.5, 186.2, 151.3, 143.7, 136.3, 134.7, 129.9, 129.9, 129.4, 129.4, 125.8, 125.8, 125.7, 124.5 (C–F, *J* = 272.5 Hz), 122.1, 122.1, 118.2, 103.2, 83.3, 51.3, 48.1, 35.4, 32.0, 25.71, 20.9; HRMS (TOF ES<sup>+</sup>): *m/z* calcd for C<sub>25</sub>H<sub>25</sub>F<sub>3</sub>NO<sub>4</sub> [(M+H)<sup>+</sup>], 460.1730, found, 460.1740.

**3a,7a-Dihydroxy-6,6-dimethyl-3-(4-nitrobenzoyl)-1(*p*-tolyl)-1,3a,5,6,7,7a-hexahydro-4*H*-indol-4-one (3i)**

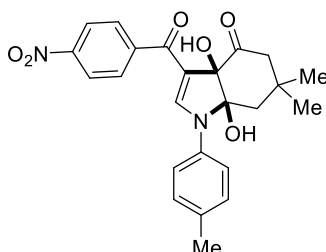

V<sub>Petroleum ether</sub>/V<sub>Ethyl acetate</sub> = 1:1, R<sub>f</sub> = 0.2; Yellow solid: 171 mg (78%); mp = 168–169 °C; <sup>1</sup>H NMR (600 MHz, DMSO-*d*<sub>6</sub>) δ = 8.29 (d, *J* = 8.2 Hz, 2H, ArH), 7.89 (d, *J* = 8.3 Hz, 2H, ArH), 7.78 (s, 1H, C=CH), 7.38 (d, *J* = 8.1 Hz, 2H, ArH), 7.16 (d, *J* = 8.0 Hz, 2H, ArH), 6.53 (s, 1H, OH), 5.68 (s, 1H, OH), 2.66 (d, *J* = 11.8 Hz, 1H, CH<sub>2</sub>), 2.28 (s, 3H, ArCH<sub>3</sub>), 2.16 (d, *J* = 11.7 Hz, 1H, CH<sub>2</sub>), 2.09 (d, *J* = 14.2 Hz, 1H, CH<sub>2</sub>), 1.97 (d, *J* = 14.0 Hz, 1H, CH<sub>2</sub>), 1.01 (s, 3H, CCH<sub>3</sub>), 0.86 (s, 3H, CCH<sub>3</sub>); <sup>13</sup>C NMR (150 MHz, DMSO-*d*<sub>6</sub>) δ = 206.4, 185.6, 151.7, 148.8, 145.8, 136.2, 134.9, 129.9, 129.9, 129.9, 129.9, 124.0, 124.0, 122.1, 122.1, 118.3, 103.4, 83.2, 51.3, 48.1, 35.4, 32.0, 25.7, 20.9; HRMS (TOF ES<sup>+</sup>): *m/z* calcd for C<sub>24</sub>H<sub>25</sub>N<sub>2</sub>O<sub>6</sub> [(M+H)<sup>+</sup>], 437.1707, found, 437.1720.

**3a,7a-Dihydroxy-6,6-dimethyl-3-(4-(methylsulfonyl)benzoyl)-1(*p*-tolyl)-1,3a,5,6,7,7a-hexahydro-4*H*-indol-4-one (3j)**

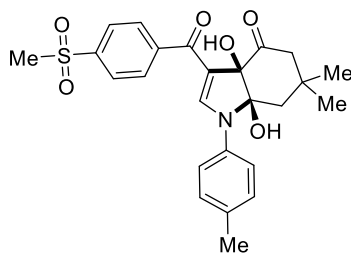

$V_{\text{Petroleum ether}}/V_{\text{Ethyl acetate}} = 1:1$   $R_f = 0.2$ ; Yellow solid: 146 mg (62%); mp = 142–143 °C;  $^1\text{H NMR}$  (600 MHz,  $\text{DMSO-}d_6$ )  $\delta = 7.99$  (d,  $J = 7.9$  Hz, 2H, ArH), 7.88 (d,  $J = 7.9$  Hz, 2H, ArH), 7.76 (s, 1H, C=CH), 7.37 (d,  $J = 8.0$  Hz, 2H, ArH), 7.15 (d,  $J = 8.0$  Hz, 2H, ArH), 6.49 (s, 1H, OH), 5.64 (s, 1H, OH), 3.26 (s, 3H,  $\text{CH}_3$ ), 2.64 (d,  $J = 12.0$  Hz, 1H,  $\text{CH}_2$ ), 2.27 (s, 3H, Ar $\text{CH}_3$ ), 2.15 (d,  $J = 11.6$  Hz, 1H,  $\text{CH}_2$ ), 2.07 (d,  $J = 14.3$  Hz, 1H,  $\text{CH}_2$ ), 1.95 (d,  $J = 14.2$  Hz, 1H,  $\text{CH}_2$ ), 0.99 (s, 3H,  $\text{CCH}_3$ ), 0.84 (s, 3H,  $\text{CCH}_3$ );  $^{13}\text{C NMR}$  (150 MHz,  $\text{DMSO-}d_6$ )  $\delta = 206.5$ , 186.0, 151.4, 144.4, 142.5, 136.2, 134.8, 129.9, 129.9, 129.4, 129.4, 127.6, 127.6, 122.1, 122.1, 118.2, 103.3, 83.3, 51.2, 48.1, 43.9, 35.5, 32.0, 25.7, 20.9; HRMS (TOF ES $^+$ ):  $m/z$  calcd for  $\text{C}_{25}\text{H}_{28}\text{NO}_6\text{S}$  [(M+H) $^+$ ], 470.1632, found, 470.1644.

**3-Cinnamoyl-3a,7a-dihydroxy-6,6-dimethyl-1-(*p*-tolyl)-1,3a,5,6,7,7a-hexahydro-4H-indol-4-one (3k)**

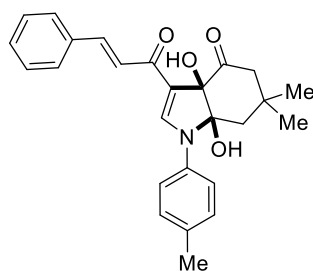

$V_{\text{Petroleum ether}}/V_{\text{Ethyl acetate}} = 1:1$ ,  $R_f = 0.2$ ; Yellow solid: 173 mg (83%); mp = 197–198°C;  $^1\text{H NMR}$  (600 MHz,  $\text{DMSO-}d_6$ )  $\delta = 8.65$  (s, 1H, C=CH), 7.78 (d,  $J = 7.4$  Hz, 2H, ArH), 7.66 (d,  $J = 15.5$  Hz, 1H, C=CH), 7.48–7.43 (m, 6H, ArH+C=CH), 7.41–7.38 (m, 2H, ArH), 7.22 (d,  $J = 8.1$  Hz, 2H, ArH), 6.45 (s, 1H, OH), 5.48 (s, 1H, OH), 2.54 (d,  $J = 12.0$  Hz, 1H,  $\text{CH}_2$ ), 2.31 (s, 3H, Ar $\text{CH}_3$ ), 2.14–2.09 (m, 2H,  $\text{CH}_2$ ), 1.80 (d,  $J = 14.0$  Hz, 1H,  $\text{CH}_2$ ), 0.96 (s, 3H,  $\text{CCH}_3$ ), 0.84 (s, 3H,  $\text{CCH}_3$ );  $^{13}\text{C NMR}$  (150 MHz,  $\text{DMSO-}d_6$ )  $\delta = 206.7$ , 180.8, 148.7, 138.7, 136.8, 135.8, 134.1, 130.0, 129.9, 129.9, 129.2, 129.2, 128.7, 128.7, 124.0, 122.0, 121.1, 121.1, 103.1, 83.1, 51.2, 48.1, 35.6, 32.0, 25.7, 20.9; HRMS (TOF ES $^+$ ):  $m/z$  calcd for  $\text{C}_{26}\text{H}_{28}\text{NO}_4$  [(M+H) $^+$ ], 418.2013, found, 418.2028.

**3-(2-Naphthoyl)-3a,7a-dihydroxy-6,6-dimethyl-1-(*p*-tolyl)-1,3a,5,6,7,7a-hexahydro-4H-indol-4-one (3l)**

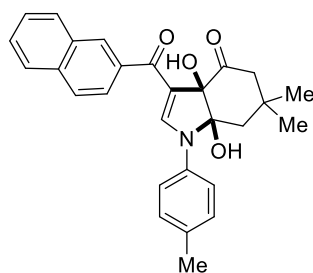

$V_{\text{Petroleum ether}}/V_{\text{Ethyl acetate}} = 1:2$ ,  $R_f = 0.2$ ; Yellow solid: 158 mg (71%); mp = 119–120 °C;  $^1\text{H NMR}$  (600 MHz,  $\text{DMSO-}d_6$ )  $\delta = 8.31$  (s, 1H, C=CH), 8.10 (d,  $J = 7.9$  Hz, 1H, ArH), 7.97 (t,  $J = 7.2$  Hz, 2H, ArH), 7.83 (s, 1H, ArH), 7.71 (d,  $J = 8.5$  Hz, 1H, ArH), 7.63–7.55 (m, 2H, ArH), 7.36 (d,  $J = 8.1$  Hz, 2H, ArH), 7.13 (d,  $J = 8.1$  Hz, 2H, ArH), 6.45 (s, 1H, OH), 5.62 (s, 1H, OH), 2.68 (d,  $J = 12.0$  Hz, 1H,  $\text{CH}_2$ ), 2.26 (s, 3H,  $\text{ArCH}_3$ ), 2.18 (d,  $J = 11.9$  Hz, 1H,  $\text{CH}_2$ ), 2.08 (d,  $J = 14.3$  Hz, 1H,  $\text{CH}_2$ ), 1.97 (d,  $J = 13.9$  Hz, 1H,  $\text{CH}_2$ ), 1.01 (s, 3H,  $\text{CCH}_3$ ), 0.86 (s, 3H,  $\text{CCH}_3$ );  $^{13}\text{C NMR}$  (150 MHz,  $\text{DMSO-}d_6$ )  $\delta = 206.7, 187.4, 150.7, 137.2, 136.6, 134.5, 134.4, 132.7, 129.9, 129.9, 129.6, 128.8, 128.4, 128.0, 127.9, 127.0, 125.7, 121.9, 121.9, 118.7, 103.0, 83.6, 51.3, 48.1, 35.5, 32.1, 25.7, 20.9$ ; HRMS (TOF ES+):  $m/z$  calcd for  $\text{C}_{28}\text{H}_{28}\text{NO}_4$  [(M+H)<sup>+</sup>], 442.2013, found, 442.2022.

**3-([1,1'-Biphenyl]-4-carbonyl)-3a,7a-dihydroxy-6,6-dimethyl-1-(*p*-tolyl)-1,3a,5,6,7,7a-hexahydro-4*H*-indol-4-one (3m)**

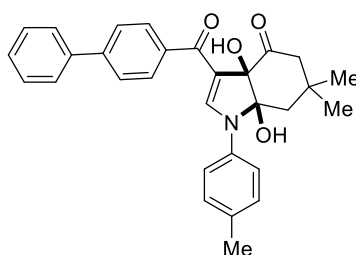

$V_{\text{Petroleum ether}}/V_{\text{Ethyl acetate}} = 1:2$ ,  $R_f = 0.2$ ; Yellow solid: 165 mg (72%); mp = 180–181 °C;  $^1\text{H NMR}$  (600 MHz,  $\text{DMSO-}d_6$ )  $\delta = 7.78$ –7.76 (m, 5H, ArH+C=CH), 7.74 (d,  $J = 7.7$  Hz, 2H, ArH), 7.51 (t,  $J = 7.6$  Hz, 2H, ArH), 7.42 (t,  $J = 7.4$  Hz, 1H, ArH), 7.38 (d,  $J = 8.1$  Hz, 2H, ArH), 7.16 (d,  $J = 8.1$  Hz, 2H, ArH), 6.46 (s, 1H, OH), 5.59 (s, 1H, OH), 2.65 (d,  $J = 11.9$  Hz, 1H,  $\text{CH}_2$ ), 2.28 (s, 3H, ,  $\text{ArCH}_3$ ), 2.17 (d,  $J = 10.8$  Hz, 1H,  $\text{CH}_2$ ), 2.07 (d,  $J = 14.1$  Hz, 1H,  $\text{CH}_2$ ), 1.95 (d,  $J = 14.2$  Hz, 1H,  $\text{CH}_2$ ), 1.00 (s, 3H,  $\text{CCH}_3$ ), 0.86 (s, 3H,  $\text{CCH}_3$ );  $^{13}\text{C NMR}$  (150 MHz,  $\text{DMSO-}d_6$ )  $\delta = 206.7, 187.0, 150.3, 142.8, 139.8, 138.8, 136.5, 134.5, 129.9, 129.9, 129.6, 129.6, 129.4, 129.4, 128.5, 127.3, 127.3, 127.1, 127.1, 121.9, 121.9, 118.6, 102.9, 83.6, 51.3, 48.1, 35.4, 32.0, 25.7, 20.9$ ; HRMS (TOF ES+):  $m/z$  calcd for  $\text{C}_{30}\text{H}_{30}\text{NO}_4$  [(M+H)<sup>+</sup>], 468.2169, found, 468.2170.

**3-(Benzo[*d*][1,3]dioxole-5-carbonyl)-3a,7a-dihydroxy-6,6-dimethyl-1-(*p*-tolyl)-1,3a,5,6,7,7a-hexahydro-4*H*-indol-4-one (3n)**

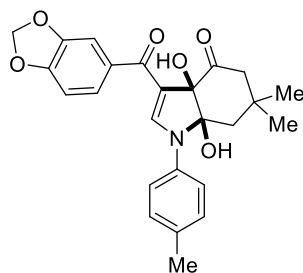

$V_{\text{Petroleum ether}}/V_{\text{Ethyl acetate}} = 1:2$ ,  $R_f = 0.2$ ; Yellow solid: 163 mg (75%); mp = 104–105 °C;  $^1\text{H NMR}$  (600 MHz,  $\text{DMSO-}d_6$ )  $\delta = 7.71$  (s, 1H, C=CH), 7.36 (d,  $J = 8.1$  Hz, 2H, ArH), 7.27 (d,  $J = 8.1$  Hz, 1H, ArH), 7.20 (s, 1H, ArH), 7.15 (d,  $J = 8.1$  Hz, 2H, ArH), 6.97 (d,  $J = 8.0$  Hz, 1H, ArH), 6.39 (s, 1H, OH), 6.10 (d,  $J = 2.9$  Hz, 2H,  $\text{OCH}_2$ ), 5.51 (s, 1H, OH), 2.59 (s, 1H,  $\text{CH}_2$ ), 2.28 (s, 3H,  $\text{ArCH}_3$ ), 2.13 (d,  $J = 11.5$  Hz, 1H,  $\text{CH}_2$ ), 2.04 (d,  $J = 14.2$  Hz, 1H,  $\text{CH}_2$ ), 1.93 (d,  $J = 14.2$  Hz, 1H,  $\text{CH}_2$ ), 0.98 (s, 3H,  $\text{CCH}_3$ ), 0.84 (s, 3H,  $\text{CCH}_3$ );  $^{13}\text{C NMR}$  (150 MHz,  $\text{DMSO-}d_6$ )  $\delta = 206.6, 186.1, 145.0, 149.8,$

147.7, 136.7, 134.2, 134.2, 129.9, 129.9, 123.8, 121.8, 121.8, 118.3, 108.8, 108.4, 102.7, 102.0, 83.7, 51.3, 48.0, 35.3, 32.0, 25.7, 20.9; HRMS (TOF ES<sup>+</sup>): m/z calcd for C<sub>25</sub>H<sub>26</sub>NO<sub>6</sub> [(M+H)<sup>+</sup>], 436.1755, found, 436.1763.

**3a,7a-Dihydroxy-6,6-dimethyl-3-(thiophene-2-carbonyl)-1-(*p*-tolyl)-1,3a,5,6,7,7a-hexahydro-4*H*-indol-4-one (3o)**

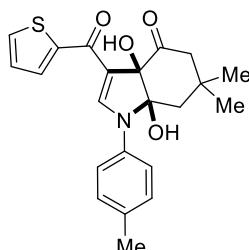

V<sub>Petroleum ether</sub>/V<sub>Ethyl acetate</sub> = 1:2, R<sub>f</sub> = 0.2; Yellow solid: 159 mg (80%); mp = 159–160 °C; <sup>1</sup>H NMR (600 MHz, DMSO-*d*<sub>6</sub>) δ = 8.10 (s, 1H, C=CH), 7.88 (d, *J* = 3.8 Hz, 1H, C=CH), 7.82 (d, *J* = 5.0 Hz, 1H, C=CH), 7.42 (d, *J* = 8.1 Hz, 2H, ArH), 7.19 (s, 1H, C=CH), 7.17 (t, *J* = 4.1 Hz, 2H, ArH), 6.43 (s, 1H, OH), 5.54 (s, 1H, OH), 2.59 (d, *J* = 11.9 Hz, 1H, CH<sub>2</sub>), 2.29 (s, 3H, ArCH<sub>3</sub>), 2.14 (d, *J* = 11.7 Hz, 1H, CH<sub>2</sub>), 2.04 (d, *J* = 14.2 Hz, 1H, CH<sub>2</sub>), 1.90 (d, *J* = 13.7 Hz, 1H, CH<sub>2</sub>), 0.97 (s, 3H, CCH<sub>3</sub>), 0.83 (s, 3H, CCH<sub>3</sub>); <sup>13</sup>C NMR (150 MHz, DMSO-*d*<sub>6</sub>) δ = 206.5, 178.2, 149.0, 144.6, 136.6, 134.5, 131.8, 130.8, 129.9, 129.9, 128.6, 122.1, 122.1, 118.0, 102.6, 83.7, 51.2, 48.1, 35.4, 32.1, 25.7, 20.9; HRMS (TOF ES<sup>+</sup>): m/z calcd for C<sub>22</sub>H<sub>24</sub>NO<sub>4</sub>S [(M+H)<sup>+</sup>], 398.1421, found, 398.1427.

**3-(Furan-2-carbonyl)-3a,7a-dihydroxy-6,6-dimethyl-1-(*p*-tolyl)-1,3a,5,6,7,7a-hexahydro-4*H*-indol-4-one (3p)**

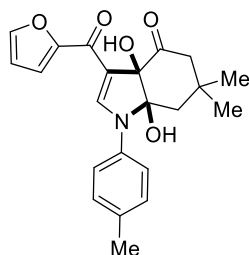

V<sub>Petroleum ether</sub>/V<sub>Ethyl acetate</sub> = 1:2, R<sub>f</sub> = 0.2; Yellow solid: 156 mg (81%); mp = 179–180 °C; <sup>1</sup>H NMR (600 MHz, DMSO-*d*<sub>6</sub>) δ = 8.31 (s, 1H, C=CH), 7.88 (s, 1H, C=CH), 7.40 (d, *J* = 8.0 Hz, 2H, ArH), 7.20 (d, *J* = 8.0 Hz, 2H, ArH), 7.16 (d, *J* = 3.6 Hz, 1H, C=CH), 6.65 (s, 1H, C=CH), 6.45 (s, 1H, OH), 5.52 (s, 1H, OH), 2.58 (d, *J* = 11.7 Hz, 1H, CH<sub>2</sub>), 2.30 (s, 3H, ArCH<sub>3</sub>), 2.13 (d, *J* = 11.5 Hz, 1H, CH<sub>2</sub>), 2.03 (d, *J* = 14.1 Hz, 1H, CH<sub>2</sub>), 1.86 (d, *J* = 14.0 Hz, 1H, CH<sub>2</sub>), 0.96 (s, 3H, CCH<sub>3</sub>), 0.82 (s, 3H, CCH<sub>3</sub>); <sup>13</sup>C NMR (150 MHz, DMSO-*d*<sub>6</sub>) δ = 206.5, 173.1, 153.2, 149.4, 146.1, 136.5, 134.7, 130.0, 130.0, 122.1, 122.1, 117.9, 115.7, 112.4, 102.5, 83.5, 51.1, 48.1, 35.6, 32.0, 25.8, 20.9; HRMS (TOF ES<sup>+</sup>): m/z calcd for C<sub>22</sub>H<sub>24</sub>NO<sub>5</sub> [(M+H)<sup>+</sup>], 382.1649, found, 382.1659.

**3-((1*r*,3*r*,5*r*,7*r*)-Adamantane-2-carbonyl)-3a,7a-dihydroxy-6,6-dimethyl-1-(*p*-tolyl)-1,3a,5,6,7,7a-hexahydro-4*H*-indol-4-one (3q)**

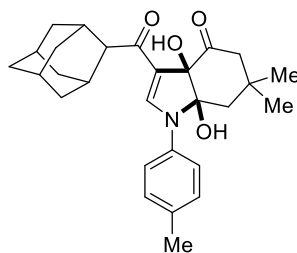

$V_{\text{Petroleum ether}}/V_{\text{Ethyl acetate}} = 1:3$ ,  $R_f = 0.2$ ; White solid: 150 mg (67%); mp = 194–195 °C;  $^1\text{H NMR}$  (600 MHz,  $\text{DMSO-}d_6$ )  $\delta = 8.05$  (s, 1H, C=CH), 7.31 (d,  $J = 8.0$  Hz, 2H, ArH), 7.17 (d,  $J = 8.0$  Hz, 2H, ArH), 6.15 (s, 1H, OH), 5.14 (s, 1H, OH), 2.37 (d,  $J = 11.6$  Hz, 1H,  $\text{CH}_2$ ), 2.28 (s, 3H,  $\text{ArCH}_3$ ), 2.06 (d,  $J = 13.0$  Hz, 1H,  $\text{CH}_2$ ), 1.98–1.94 (m, 4H,  $\text{CH}_2+\text{CH}$ ), 1.89–1.85 (m, 6H,  $\text{CH}_2$ ), 1.74 (d,  $J = 11.9$  Hz, 3H, CH), 1.69–1.64 (m, 4H,  $\text{CH}_2$ ), 0.94 (s, 3H,  $\text{CCH}_3$ ), 0.79 (s, 3H,  $\text{CCH}_3$ );  $^{13}\text{C NMR}$  (150 MHz,  $\text{DMSO-}d_6$ )  $\delta = 206.9$ , 198.4, 146.3, 136.7, 134.1, 129.8, 129.8, 122.0, 122.0, 117.6, 101.0, 84.5, 51.0, 48.0, 45.2, 36.6, 36.6, 36.6, 36.6, 35.8, 32.3, 28.4, 28.4, 28.4, 28.4, 28.4, 25.6, 20.9; HRMS (TOF ES<sup>+</sup>):  $m/z$  calcd for  $\text{C}_{28}\text{H}_{36}\text{NO}_4$  [(M+H)<sup>+</sup>], 450.2639, found, 450.2636.

**3-Benzoyl-3a,7a-dihydroxy-2,6,6-trimethyl-1-(p-tolyl)-1,3a,5,6,7,7a-hexahydro-4H-indol-4-one (3r)**

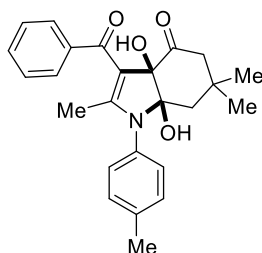

$V_{\text{Petroleum ether}}/V_{\text{Ethyl acetate}} = 1:1$ ,  $R_f = 0.2$ ; Yellow oil: 142 mg (70%);  $^1\text{H NMR}$  (600 MHz,  $\text{DMSO-}d_6$ )  $\delta = 7.67$ –7.64 (m, 1H, ArH), 7.57 (d,  $J = 7.7$  Hz, 2H, ArH), 7.33 (d,  $J = 8.0$  Hz, 2H, ArH), 7.26 (d,  $J = 7.7$  Hz, 2H, ArH), 7.14 (d,  $J = 8.0$  Hz, 2H, ArH), 6.41 (s, 1H, OH), 5.53 (s, 1H, OH), 2.60 (d,  $J = 11.9$  Hz, 1H,  $\text{CH}_2$ ), 2.35 (s, 3H,  $\text{ArCH}_3$ ), 2.27 (s, 3H,  $\text{CCH}_3$ ), 2.14 (d,  $J = 12.9$  Hz, 1H,  $\text{CH}_2$ ), 2.04 (d,  $J = 14.2$  Hz, 1H,  $\text{CH}_2$ ), 1.90 (d,  $J = 14.1$  Hz, 1H,  $\text{CH}_2$ ), 0.98 (s, 3H,  $\text{CCH}_3$ ), 0.83 (s, 3H,  $\text{CCH}_3$ );  $^{13}\text{C NMR}$  (150 MHz,  $\text{DMSO-}d_6$ )  $\delta = 206.3$ , 187.0, 149.6, 140.8, 136.8, 136.2, 134.0, 129.6, 129.6, 129.0, 129.0, 128.4, 128.4, 121.4, 121.4, 118.2, 102.5, 83.2, 50.9, 47.7, 35.1, 31.7, 25.4, 21.2, 20.5; HRMS (TOF ES<sup>+</sup>):  $m/z$  calcd for  $\text{C}_{25}\text{H}_{28}\text{NO}_4$  [(M+H)<sup>+</sup>], 406.2013, found, 406.2013.

**3-Benzoyl-3a,7a-dihydroxy-6,6-dimethyl-2-phenyl-1-(p-tolyl)-1,3a,5,6,7,7a-hexahydro-4H-indol-4-one (3s)**

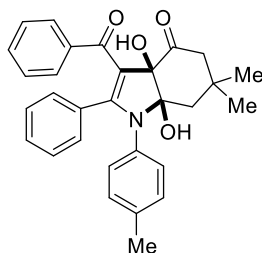

$V_{\text{Petroleum ether}}/V_{\text{Ethyl acetate}} = 1:1$ ,  $R_f = 0.2$ ; Yellow solid: 166 mg (76%); mp = 118–119 °C;  $^1\text{H NMR}$  (600 MHz,  $\text{DMSO-}d_6$ )  $\delta = 7.11\text{--}7.03$  (m, 3H, ArH), 6.96–6.85 (m, 11H, ArH), 5.87 (s, 1H, OH), 5.53 (s, 1H, OH), 2.72 (d,  $J = 9.9$  Hz, 1H,  $\text{CH}_2$ ), 2.42 (d,  $J = 12.9$  Hz, 1H,  $\text{CH}_2$ ), 2.16 (s, 5H,  $\text{CH}_2\text{+ArCH}_3$ ), 1.11 (s, 3H,  $\text{CCH}_3$ ), 0.88 (s, 3H,  $\text{CCH}_3$ );  $^{13}\text{C NMR}$  (150 MHz,  $\text{DMSO-}d_6$ )  $\delta = 206.8$ , 190.0, 160.7, 140.8, 135.7, 135.1, 131.1, 130.2, 130.2, 129.8, 129.5, 129.2, 129.2, 128.7, 128.7, 128.3, 128.3, 127.8, 127.8, 127.4, 127.4, 116.8, 101.1, 85.4, 51.3, 49.1, 35.4, 32.3, 25.7, 20.9; HRMS (TOF ES<sup>+</sup>):  $m/z$  calcd for  $\text{C}_{30}\text{H}_{30}\text{NO}_4$  [(M+H)<sup>+</sup>], 468.2169, found, 468.2176.

**4a,9a-Dihydroxy-2,2,7,7-tetramethyl-9-(*p*-tolyl)-2,3,4a,6,7,8,9,9a-octahydro-1*H*-carbazole-4,5-dione (3t)**

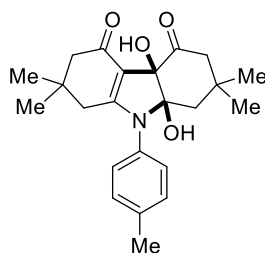

$V_{\text{Petroleum ether}}/V_{\text{Ethyl acetate}} = 1:1$ ,  $R_f = 0.2$ ; White solid: 116 mg (65%); mp = 183–184 °C;  $^1\text{H NMR}$  (600 MHz,  $\text{DMSO-}d_6$ )  $\delta = 7.24$  (q,  $J = 8.1$  Hz, 4H, ArH), 6.11 (s, 1H, OH), 5.35 (s, 1H, OH), 2.54 (s, 1H,  $\text{CH}_2$ ), 2.49 (s, 1H,  $\text{CH}_2$ ), 2.32 (s, 3H,  $\text{ArCH}_3$ ), 2.22 (d,  $J = 15.9$  Hz, 1H,  $\text{CH}_2$ ), 2.07 (d,  $J = 11.5$  Hz, 1H,  $\text{CH}_2$ ), 1.89 (t,  $J = 15.4$  Hz, 3H,  $\text{CH}_2$ ), 1.68 (d,  $J = 13.7$  Hz, 1H,  $\text{CH}_2$ ), 1.00 (s, 3H,  $\text{CCH}_3$ ), 0.95 (s, 3H,  $\text{CCH}_3$ ), 0.90 (s, 3H,  $\text{CCH}_3$ ), 0.73 (s, 3H,  $\text{CCH}_3$ );  $^{13}\text{C NMR}$  (150 MHz,  $\text{DMSO-}d_6$ )  $\delta = 207.6$ , 189.1, 165.7, 137.2, 133.6, 129.8, 129.8, 128.8, 128.8, 112.5, 102.8, 81.2, 51.1, 50.4, 48.2, 37.6, 34.7, 34.3, 32.0, 29.9, 26.9, 25.4, 21.1; HRMS (TOF ES<sup>+</sup>):  $m/z$  calcd for  $\text{C}_{23}\text{H}_{30}\text{NO}_4$  [(M+H)<sup>+</sup>], 384.2169, found, 384.2171.

**3-Benzoyl-3a,7a-dihydroxy-6,6-dimethyl-1-(3,4,5-trimethoxyphenyl)-1,3a,5,6,7,7a-hexahydro-4*H*-indol-4-one (3u)**

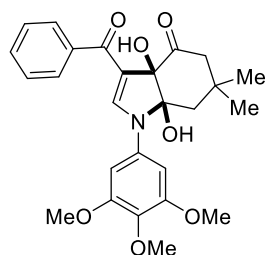

$V_{\text{Petroleum ether}}/V_{\text{Ethyl acetate}} = 1:2$ ,  $R_f = 0.2$ ; White solid: 196 mg (84%); mp = 177–178 °C;  $^1\text{H NMR}$  (600 MHz,  $\text{DMSO-}d_6$ )  $\delta = 7.69$  (s, 1H, C=CH), 7.67 (d,  $J = 7.7$  Hz, 2H, ArH), 7.53 (t,  $J = 7.4$  Hz, 1H, ArH), 7.46 (t,  $J = 7.5$  Hz, 2H, ArH), 6.80 (s, 2H, ArH), 6.49 (s, 1H, OH), 5.57 (s, 1H, OH), 3.76 (s, 6H,  $\text{ArOCH}_3$ ), 3.63 (s, 3H,  $\text{ArOCH}_3$ ), 2.62 (d,  $J = 11.7$  Hz, 1H,  $\text{CH}_2$ ), 2.16 (d,  $J = 11.7$  Hz, 1H,  $\text{CH}_2$ ), 1.96 (dd,  $J = 31.2$ , 13.9 Hz, 2H,  $\text{CH}_2$ ), 1.00 (s, 3H,  $\text{CCH}_3$ ), 0.83 (s, 3H,  $\text{CCH}_3$ );  $^{13}\text{C NMR}$  (150 MHz,  $\text{DMSO-}d_6$ )  $\delta = 206.8$ , 187.4, 153.2, 151.2, 139.9, 135.8, 134.9, 131.4, 128.8, 128.8, 128.8, 128.8, 128.8, 128.8, 118.2, 103.1, 101.7, 83.5, 60.5, 56.6, 56.6, 51.4, 47.9, 35.4, 32.1, 25.7; HRMS (TOF ES<sup>+</sup>):  $m/z$  calcd for  $\text{C}_{26}\text{H}_{30}\text{NO}_7$  [(M+H)<sup>+</sup>], 468.2017, found, 468.2023.

**3-Benzoyl-1-(2,6-diisopropylphenyl)-3a,7a-dihydroxy-6,6-dimethyl-1,3a,5,6,7,7a-hexahydro-4H-indol-4-one (3v)**

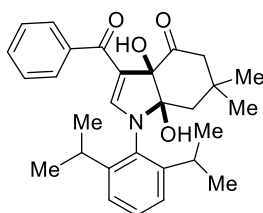

$V_{\text{Petroleum ether}}/V_{\text{Ethyl acetate}} = 1:3$ ,  $R_f = 0.2$ ; White solid: 140 mg (61%); mp = 143–144°C;  $^1\text{H NMR}$  (600 MHz,  $\text{DMSO-}d_6$ )  $\delta = 7.58\text{--}7.56$  (m, 2H, C=CH+ArH), 7.49–7.45 (m, 1H, ArH), 7.43–7.39 (m, 2H, ArH, ArH), 7.34 (d,  $J = 7.6$  Hz, 1H, ArH), 7.30 (d,  $J = 7.6$  Hz, 1H, ArH), 7.23 (d,  $J = 7.6$  Hz, 1H, ArH), 5.78 (s, 1H, OH), 5.55 (s, 1H, OH), 3.11–2.99 (m, 2H, C–CH), 2.74 (d,  $J = 11.9$  Hz, 1H,  $\text{CH}_2$ ), 2.29 (d,  $J = 13.8$  Hz, 1H,  $\text{CH}_2$ ), 2.16 (d,  $J = 11.3$  Hz, 1H,  $\text{CH}_2$ ), 1.85 (d,  $J = 13.2$  Hz, 1H,  $\text{CH}_2$ ), 1.30 (d,  $J = 6.1$  Hz, 3H,  $\text{CCH}_3$ ), 1.22 (d,  $J = 6.3$  Hz, 3H,  $\text{CCH}_3$ ), 1.18 (d,  $J = 6.0$  Hz, 3H,  $\text{CCH}_3$ ), 1.05 (s, 3H,  $\text{CCH}_3$ ,  $\text{CCH}_3$ ), 0.92 (d,  $J = 6.2$  Hz, 3H,  $\text{CCH}_3$ ), 0.81 (s, 3H,  $\text{CCH}_3$ );  $^{13}\text{C NMR}$  (150 MHz,  $\text{DMSO-}d_6$ )  $\delta = 206.9$ , 186.8, 155.6, 150.6, 147.8, 140.3, 131.8, 131.0, 129.3, 128.6, 128.6, 128.4, 128.4, 124.9, 124.5, 115.2, 104.0, 83.7, 51.3, 46.2, 35.3, 32.0, 29.0, 28.4, 26.5, 25.9, 25.2, 24.0, 23.1; HRMS (TOF ES+):  $m/z$  calcd for  $\text{C}_{29}\text{H}_{36}\text{NO}_4$  [(M+H)<sup>+</sup>], 462.2639, found, 462.2634.

**3-Benzoyl-3a,7a-dihydroxy-6,6-dimethyl-1-phenyl-1,3a,5,6,7,7a-hexahydro-4H-indol-4-one (3w)**

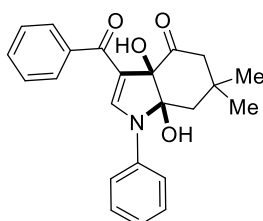

$V_{\text{Petroleum ether}}/V_{\text{Ethyl acetate}} = 1:3$ ,  $R_f = 0.2$ ; White solid: 162 mg (86%); mp = 140–141°C;  $^1\text{H NMR}$  (600 MHz,  $\text{DMSO-}d_6$ )  $\delta = 7.74$  (s, 1H, C=CH), 7.69 (d,  $J = 7.5$  Hz, 2H, ArH), 7.54 (t,  $J = 7.4$  Hz, 1H, ArH), 7.47 (t,  $J = 7.8$  Hz, 4H, ArH), 7.34 (t,  $J = 7.8$  Hz, 2H, ArH), 7.15 (t,  $J = 7.4$  Hz, 1H, ArH), 6.49 (s, 1H, OH), 5.59 (s, 1H, OH), 2.63 (d,  $J = 11.7$  Hz, 1H,  $\text{CH}_2$ ), 2.16 (t,  $J = 11.7$  Hz, 2H,  $\text{CH}_2$ ), 1.97 (d,  $J = 14.8$  Hz, 1H,  $\text{CH}_2$ ), 1.00 (s, 3H,  $\text{CCH}_3$ ), 0.87 (s, 3H,  $\text{CCH}_3$ );  $^{13}\text{C NMR}$  (150 MHz,  $\text{DMSO-}d_6$ )  $\delta = 206.5$ , 187.7, 149.9, 139.8, 139.0, 131.3, 129.5, 129.5, 128.8, 128.8, 128.7, 128.7, 124.9, 121.4, 121.4, 118.9, 102.9, 83.6, 51.3, 48.1, 35.5, 32.0, 25.7; HRMS (TOF ES+):  $m/z$  calcd for  $\text{C}_{23}\text{H}_{24}\text{NO}_4$  [(M+H)<sup>+</sup>], 378.1700, found, 378.1796.

**3-Benzoyl-1-(4-chlorophenyl)-3a,7a-dihydroxy-6,6-dimethyl-1,3a,5,6,7,7a-hexahydro-4H-indol-4-one (3x)**



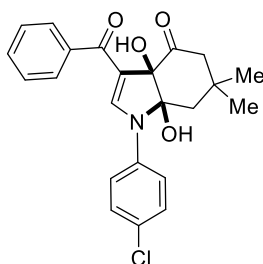

$V_{\text{Petroleum ether}}/V_{\text{Ethyl acetate}} = 1:2$ ,  $R_f = 0.2$ ; White solid: 160 mg (78%); mp = 155–156°C;  $^1\text{H NMR}$  (600 MHz,  $\text{DMSO-}d_6$ )  $\delta = 7.77$  (s, 1H, C=CH), 7.69 (d,  $J = 7.5$  Hz, 2H, ArH), 7.54 (t,  $J = 7.4$  Hz, 1H, ArH), 7.51–7.46 (m, 4H, ArH), 7.39 (d,  $J = 8.4$  Hz, 2H, ArH), 6.57 (s, 1H, OH), 5.63 (s, 1H, OH), 2.61 (d,  $J = 11.8$  Hz, 1H,  $\text{CH}_2$ ), 2.16 (dd,  $J = 12.6, 7.7$  Hz, 2H,  $\text{CH}_2$ ), 1.96 (t,  $J = 14.2$  Hz, 1H,  $\text{CH}_2$ ), 1.00 (s, 3H,  $\text{CCH}_3$ ), 0.86 (s, 3H,  $\text{CCH}_3$ );  $^{13}\text{C NMR}$  (150 MHz,  $\text{DMSO-}d_6$ )  $\delta = 206.3, 187.9, 149.5, 139.7, 138.0, 131.4, 129.3, 129.3, 128.9, 128.9, 128.7, 128.7, 128.7, 122.7, 122.7, 119.4, 103.0, 83.4, 51.3, 47.9, 35.4, 32.0, 25.7$ ; HRMS (TOF ES<sup>+</sup>):  $m/z$  calcd for  $\text{C}_{23}\text{H}_{23}\text{ClNO}_4$  [(M+H)<sup>+</sup>], 412.1310, found, 412.1321.

**3-Benzoyl-1-(2-chlorophenyl)-3a,7a-dihydroxy-6,6-dimethyl-1,3a,5,6,7,7a-hexahydro-4H-indol-4-one (3y)**

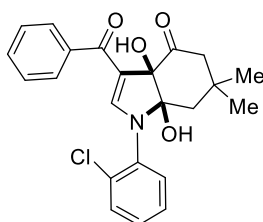

$V_{\text{Petroleum ether}}/V_{\text{Ethyl acetate}} = 1:2$ ,  $R_f = 0.2$ ; Yellow solid: 100 mg (49%); mp = 77–78°C;  $^1\text{H NMR}$  (600 MHz,  $\text{DMSO-}d_6$ )  $\delta = 7.75$  (s, 1H, C=CH), 7.68 (d,  $J = 7.1$  Hz, 2H, ArH), 7.54 (t,  $J = 7.3$  Hz, 1H, ArH), 7.47 (d,  $J = 6.3$  Hz, 4H, ArH), 7.38 (d,  $J = 8.9$  Hz, 2H, ArH), 6.56 (s, 1H, OH), 5.61 (s, 1H, OH), 2.60 (d,  $J = 12.0$  Hz, 1H,  $\text{CH}_2$ ), 2.18–2.13 (m, 2H,  $\text{CH}_2$ ), 1.94 (d,  $J = 14.2$  Hz, 1H,  $\text{CH}_2$ ), 0.99 (s, 3H,  $\text{CCH}_3$ ), 0.85 (s, 3H,  $\text{CCH}_3$ );  $^{13}\text{C NMR}$  (150 MHz,  $\text{DMSO-}d_6$ )  $\delta = 206.1, 187.6, 149.2, 139.4, 137.7, 131.2, 129.0, 129.0, 128.6, 128.6, 128.5, 128.4, 128.4, 128.4, 122.4, 122.4, 119.1, 102.7, 83.2, 51.0, 47.6, 35.2, 31.7, 25.4$ ; HRMS (TOF ES<sup>+</sup>):  $m/z$  calcd for  $\text{C}_{23}\text{H}_{23}\text{ClNO}_4$  [(M+H)<sup>+</sup>], 412.1310, found, 412.1316.

**3-Benzoyl-1-(3-chlorophenyl)-3a,7a-dihydroxy-6,6-dimethyl-1,3a,5,6,7,7a-hexahydro-4H-indol-4-one (3z)**

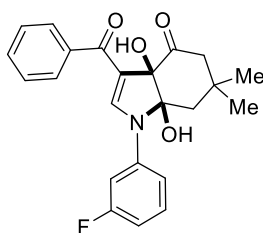

$V_{\text{Petroleum ether}}/V_{\text{Ethyl acetate}} = 1:2$ ,  $R_f = 0.2$ ; White solid: 162 mg (79%); mp = 169–170°C;  $^1\text{H NMR}$  (600 MHz,  $\text{DMSO-}d_6$ )  $\delta = 7.83$  (s, 1H, C=CH), 7.71 (d,  $J = 7.4$  Hz, 2H, ArH), 7.56 (t,  $J = 7.4$  Hz, 1H, ArH), 7.49 (t,  $J = 7.5$  Hz, 2H, ArH), 7.41 (d,  $J = 11.4$  Hz, 1H, ArH), 7.37–7.32 (m, 2H, ArH),

6.95 (t,  $J = 8.6$  Hz, 1H, ArH), 6.60 (s, 1H, OH), 5.66 (s, 1H, OH), 2.61 (d,  $J = 11.3$  Hz, 1H, CH<sub>2</sub>), 2.23 (d,  $J = 13.9$  Hz, 1H, CH<sub>2</sub>), 2.17 (d,  $J = 11.4$  Hz, 1H, CH<sub>2</sub>), 1.97 (d,  $J = 14.2$  Hz, 1H, CH<sub>2</sub>), 1.01 (s, 3H, CCH<sub>3</sub>), 0.88 (s, 3H, CCH<sub>3</sub>); <sup>13</sup>C NMR (150 MHz, DMSO-*d*<sub>6</sub>)  $\delta = 206.2, 188.0, 162.8$  (C–F,  $J = 242.1$  Hz), 149.2, 140.8 (C–F,  $J = 10.7$  Hz), 139.6, 131.5, 131.0 (C–F,  $J = 9.5$  Hz), 128.9, 128.9, 128.8, 128.8, 119.6, 116.5, 110.9 (C–F,  $J = 21.1$  Hz), 107.7 (C–F,  $J = 25.5$  Hz), 103.0, 83.5, 51.3, 47.8, 35.5, 32.0, 25.7; HRMS (TOF ES<sup>+</sup>):  $m/z$  calcd for C<sub>23</sub>H<sub>23</sub>FNO<sub>4</sub> [(M+H)<sup>+</sup>], 396.1606, found, 396.1606.

**3-Benzoyl-1-(4-(dimethylamino)phenyl)-3a,7a-dihydroxy-6,6-dimethyl-1,3a,5,6,7,7a-hexahydro-4H-indol-4-one (3a')**

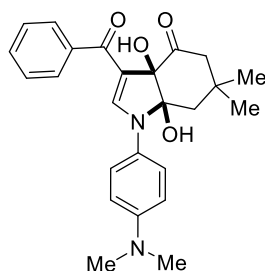

V<sub>Petroleum ether</sub>/V<sub>Ethyl acetate</sub> = 1:1, R<sub>f</sub> = 0.2; Yellow solid: 140 mg (66%); mp = 157–158°C; <sup>1</sup>H NMR (600 MHz, DMSO-*d*<sub>6</sub>)  $\delta = 7.65$  (d,  $J = 7.5$  Hz, 2H, ArH), 7.53 (s, 1H, C=CH), 7.50 (d,  $J = 7.3$  Hz, 1H, ArH), 7.45 (t,  $J = 7.5$  Hz, 2H, ArH), 7.27 (d,  $J = 8.5$  Hz, 2H, ArH), 6.69 (d,  $J = 8.6$  Hz, 2H, ArH), 6.33 (s, 1H, OH), 5.50 (s, 1H, OH), 2.88 (s, 6H, NCH<sub>3</sub>), 2.63 (d,  $J = 11.8$  Hz, 1H, CH<sub>2</sub>), 2.14 (d,  $J = 11.5$  Hz, 1H, CH<sub>2</sub>), 1.92–1.84 (m, 2H, CH<sub>2</sub>), 0.98 (s, 3H, CCH<sub>3</sub>), 0.82 (s, 3H, CCH<sub>3</sub>); <sup>13</sup>C NMR (150 MHz, DMSO-*d*<sub>6</sub>)  $\delta = 207.0, 186.8, 151.6, 149.1, 140.2, 131.0, 128.8, 128.8, 128.5, 128.5, 128.1, 124.8, 124.8, 117.5, 112.9, 112.9, 102.9, 83.4, 51.3, 48.1, 40.7, 40.7, 35.4, 32.1, 25.7$ ; HRMS (TOF ES<sup>+</sup>):  $m/z$  calcd for C<sub>25</sub>H<sub>29</sub>N<sub>2</sub>O<sub>4</sub> [(M+H)<sup>+</sup>], 421.2122, found, 421.2117.

**3-Benzoyl-3a,7a-dihydroxy-6,6-dimethyl-1-(4-(trifluoromethyl)phenyl)-1,3a,5,6,7,7a-hexahydro-4H-indol-4-one (3b')**

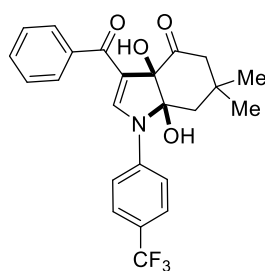

V<sub>Petroleum ether</sub>/V<sub>Ethyl acetate</sub> = 1:3, R<sub>f</sub> = 0.2; Yellow oil: 138 mg (59%); <sup>1</sup>H NMR (600 MHz, DMSO-*d*<sub>6</sub>)  $\delta = 7.87$  (s, 1H, C=CH), 7.86 (s, 1H, ArH), 7.84–7.80 (m, 3H, ArH), 7.49 (d,  $J = 7.9$  Hz, 2H, ArH), 7.35 (t,  $J = 7.8$  Hz, 2H, ArH), 7.17 (t,  $J = 7.3$  Hz, 1H, ArH), 6.54 (s, 1H, OH), 5.66 (s, 1H, OH), 2.65 (d,  $J = 11.7$  Hz, 1H, CH<sub>2</sub>), 2.16 (d,  $J = 12.8$  Hz, 2H, CH<sub>2</sub>), 2.00 (d,  $J = 11.4$  Hz, 1H, CH<sub>2</sub>), 1.01 (s, 3H, CCH<sub>3</sub>), 0.86 (s, 3H, CCH<sub>3</sub>); <sup>13</sup>C NMR (150 MHz, DMSO-*d*<sub>6</sub>)  $\delta = 206.4, 186.4, 151.0, 143.6, 138.7, 129.4, 129.4, 129.4, 129.4, 125.8, 125.8, 125.2, 124.5$  (C–F,  $J = 270$  Hz), 121.6, 121.6, 118.6, 103.2, 83.4, 51.3, 48.1, 35.5, 32.0, 25.7; HRMS (TOF ES<sup>+</sup>):  $m/z$  calcd for C<sub>24</sub>H<sub>23</sub>F<sub>3</sub>NO<sub>4</sub> [(M+H)<sup>+</sup>], 446.1574, found, 446.1584.

**3-Benzoyl-3a,7a-dihydroxy-6,6-dimethyl-1-(naphthalen-2-yl)-1,3a,5,6,7,7a-hexahydro-4H-indol-4-one (3c')**

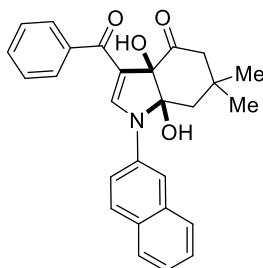

$V_{\text{Petroleum ether}}/V_{\text{Ethyl acetate}} = 1:2$ ,  $R_f = 0.2$ ; Yellow solid: 176 mg (82%); mp = 107–108°C;  $^1\text{H NMR}$  (600 MHz,  $\text{DMSO-}d_6$ )  $\delta = 8.12\text{--}8.10$  (m, 1H, ArH), 7.98–7.96 (m, 2H, ArH), 7.76–7.51 (m, 7H, ArH+C=CH), 7.43 (d,  $J = 34.8$  Hz, 3H, ArH), 6.14 (s, 1H, OH), 5.68 (s, 1H, OH), 2.75 (d,  $J = 11.8$  Hz, 1H,  $\text{CH}_2$ ), 2.35 (d,  $J = 13.9$  Hz, 1H,  $\text{CH}_2$ ), 2.19 (d,  $J = 11.8$  Hz, 1H,  $\text{CH}_2$ ), 1.94 (d,  $J = 14.0$  Hz, 1H,  $\text{CH}_2$ ), 1.04 (s, 3H,  $\text{CCH}_3$ ), 0.79 (s, 3H,  $\text{CCH}_3$ );  $^{13}\text{C NMR}$  (150 MHz,  $\text{DMSO-}d_6$ )  $\delta = 206.9$ , 187.1, 155.1, 134.0, 134.9, 134.5, 131.0, 128.7, 128.7, 128.6, 128.5, 128.5, 128.5, 128.4, 127.3, 126.8, 126.6, 126.0, 124.6, 117.6, 104.0, 83.5, 51.4, 47.9, 35.4, 32.1, 25.5; HRMS (TOF ES<sup>+</sup>):  $m/z$  calcd for  $\text{C}_{27}\text{H}_{26}\text{NO}_4$  [(M+H)<sup>+</sup>], 428.1856, found, 428.1858.

**3-Benzoyl-1-benzyl-3a,7a-dihydroxy-6,6-dimethyl-1,3a,5,6,7,7a-hexahydro-4H-indol-4-one (3d')**

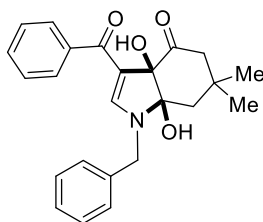

$V_{\text{Petroleum ether}}/V_{\text{Ethyl acetate}} = 1:1$ ,  $R_f = 0.2$ ; White solid: 141 mg (72%); mp = 145–146°C;  $^1\text{H NMR}$  (600 MHz,  $\text{DMSO-}d_6$ )  $\delta = 7.50\text{--}7.48$  (m, 1H, ArH), 7.48 (s, 1H, C=CH), 7.45 (d,  $J = 7.1$  Hz, 1H, ArH), 7.40 (d,  $J = 7.3$  Hz, 2H, ArH), 7.37–7.33 (m, 5H, ArH), 7.28 (d,  $J = 6.8$  Hz, 1H, ArH), 5.82 (s, 1H, OH), 5.36 (s, 1H, OH), 4.52–4.40 (m, 2H,  $\text{CH}_2$ ), 2.58 (d,  $J = 11.8$  Hz, 1H,  $\text{CH}_2$ ), 2.11 (d,  $J = 11.6$  Hz, 1H,  $\text{CH}_2$ ), 2.01 (d,  $J = 14.0$  Hz, 1H,  $\text{CH}_2$ ), 1.77 (d,  $J = 14.0$  Hz, 1H,  $\text{CH}_2$ ), 0.98 (s, 3H,  $\text{CCH}_3$ ), 0.82 (s, 3H,  $\text{CCH}_3$ );  $^{13}\text{C NMR}$  (150 MHz,  $\text{DMSO-}d_6$ )  $\delta = 207.3$ , 186.1, 154.3, 140.5, 138.3, 130.7, 129.0, 129.0, 128.7, 128.7, 128.6, 128.6, 128.2, 128.2, 127.9, 115.6, 101.2, 83.2, 51.2, 48.0, 46.4, 35.3, 32.1, 25.7; HRMS (TOF ES<sup>+</sup>):  $m/z$  calcd for  $\text{C}_{24}\text{H}_{26}\text{NO}_4$  [(M+H)<sup>+</sup>], 392.1856, found, 392.1857.

**3-Benzoyl-1-cyclohexyl-3a,7a-dihydroxy-6,6-dimethyl-1,3a,5,6,7,7a-hexahydro-4H-indol-4-one (3e')**

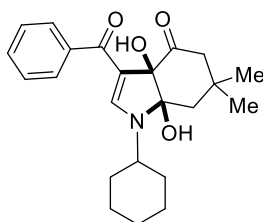

$V_{\text{Petroleum ether}}/V_{\text{Ethyl acetate}} = 1:1$ ,  $R_f = 0.2$ ; Yellow oil: 100 mg (52%);  $^1\text{H NMR}$  (600 MHz,  $\text{DMSO-}d_6$ )  $\delta = 7.51$  (s, 1H, C=CH), 7.50 (d,  $J = 1.6$  Hz, 1H, ArH), 7.47–7.42 (m, 4H, ArH), 5.78 (s, 1H, OH), 5.23 (s, 1H, OH), 3.33–3.29 (m, 1H), 2.58 (d,  $J = 11.7$  Hz, 1H, C–CH), 2.13–2.07 (m, 2H,  $\text{CH}_2$ ), 1.85 (d,  $J = 11.7$  Hz, 1H,  $\text{CH}_2$ ), 1.77–1.70 (m, 4H,  $\text{CH}_2$ ), 1.56 (d,  $J = 7.5$  Hz, 1H,  $\text{CH}_2$ ), 1.38–1.21 (m, 4H,  $\text{CH}_2$ ), 1.38–1.21 (m, 1H,  $\text{CH}_2$ ), 1.02 (s, 3H,  $\text{CCH}_3$ ), 0.82 (s, 3H,  $\text{CCH}_3$ );  $^{13}\text{C NMR}$  (150 MHz,  $\text{DMSO-}d_6$ )  $\delta = 207.5, 185.5, 151.1, 140.8, 130.5, 128.7, 128.7, 128.3, 128.25, 115.0, 101.6, 83.4, 52.0, 51.1, 48.6, 35.4, 34.3, 33.7, 32.2, 25.9, 25.9, 25.6, 25.0$ ; HRMS (TOF ES+):  $m/z$  calcd for  $\text{C}_{23}\text{H}_{30}\text{NO}_4$  [(M+H)<sup>+</sup>], 384.2169, found, 384.2168.

**3-Benzoyl-3a,7a-dihydroxy-6,6-dimethyl-1-propyl-1,3a,5,6,7,7a-hexahydro-4H-indol-4-one (3f')**

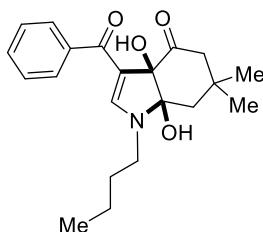

$V_{\text{Petroleum ether}}/V_{\text{Ethyl acetate}} = 1:3$ ,  $R_f = 0.2$ ; Yellow oil: 86 mg (50%);  $^1\text{H NMR}$  (600 MHz,  $\text{DMSO-}d_6$ )  $\delta = 7.53$ –7.51 (m, 2H, ArH), 7.47 (d,  $J = 7.2$  Hz, 1H, ArH), 7.43 (d,  $J = 7.6$  Hz, 2H, ArH), 7.41 (s, 1H, C=CH), 5.75 (s, 1H, OH), 5.25 (s, 1H, OH), 3.25–3.22 (m, 2H,  $\text{CH}_2$ ), 2.58 (d,  $J = 12.0$  Hz, 1H,  $\text{CH}_2$ ), 2.11–2.07 (m, 2H,  $\text{CH}_2$ ), 1.74 (d,  $J = 13.7$  Hz, 1H,  $\text{CH}_2$ ), 1.57–1.53 (m, 2H,  $\text{CH}_2$ ), 1.02 (s, 3H,  $\text{CCH}_3$ ), 0.88 (t,  $J = 7.4$  Hz, 3H,  $\text{CCH}_3$ ), 0.83 (s, 3H,  $\text{CCH}_3$ );  $^{13}\text{C NMR}$  (150 MHz,  $\text{DMSO-}d_6$ )  $\delta = 207.5, 185.7, 154.4, 140.7, 130.5, 128.6, 128.6, 128.2, 128.2, 114.9, 101.1, 83.3, 51.1, 48.0, 43.0, 35.4, 32.3, 25.7, 20.0, 14.1$ ; HRMS (TOF ES+):  $m/z$  calcd for  $\text{C}_{20}\text{H}_{26}\text{NO}_4$  [(M+H)<sup>+</sup>], 344.1856, found, 344.1861.

**3-Benzoyl-3a,7a-dihydroxy-6,6-dimethyl-2-phenyl-1,3a,5,6,7,7a-hexahydro-4H-indol-4-one (3g')**

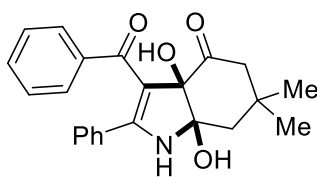

$V_{\text{Petroleum ether}}/V_{\text{Ethyl acetate}} = 1:1$ ,  $R_f = 0.2$ ; Yellow solid: 125 mg (66%); mp = 214–215°C;  $^1\text{H NMR}$  (600 MHz,  $\text{DMSO-}d_6$ )  $\delta = 10.15$  (s, 1H, NH), 7.58 (t,  $J = 8.1$  Hz, 3H, ArH), 7.52 (d,  $J = 7.4$  Hz, 2H, ArH), 7.48 (d,  $J = 8.1$  Hz, 3H, ArH), 7.39 (t,  $J = 7.8$  Hz, 2H, ArH), 2.48 (s, 1H,  $\text{CH}_2$ ), 2.39 (d,  $J = 14.1$  Hz, 1H,  $\text{CH}_2$ ), 2.24 (d,  $J = 16.3$  Hz, 1H,  $\text{CH}_2$ ), 2.18 (d,  $J = 14.0$  Hz, 1H,  $\text{CH}_2$ ), 1.24 (s, 3H,  $\text{CCH}_3$ ), 1.12 (s, 3H,  $\text{CCH}_3$ );  $^{13}\text{C NMR}$  (150 MHz,  $\text{DMSO-}d_6$ )  $\delta = 208.0, 193.5, 189.4, 180.8, 139.2, 132.5, 132.3, 130.5, 129.5, 129.5, 129.0, 129.0, 128.9, 128.9, 128.4, 128.4, 107.6, 79.6, 52.5, 46.3, 33.8, 29.3, 29.2$ ; HRMS (TOF ES+):  $m/z$  calcd for  $\text{C}_{23}\text{H}_{24}\text{NO}_4$  [(M+H)<sup>+</sup>], 378.1700, found, 378.1702.

**3-Benzoyl-3a,7a-dihydroxy-6-methyl-1-(p-tolyl)-1,3a,5,6,7,7a-hexahydro-4H-indol-4-one (3h')**

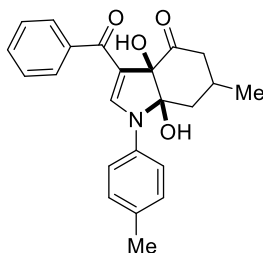

$V_{\text{Petroleum ether}}/V_{\text{Ethyl acetate}} = 1:3$ ,  $R_f = 0.2$ ; White solid: 157 mg (83%); mp = 156–157°C;  $^1\text{H NMR}$  (600 MHz,  $\text{DMSO-}d_6$ )  $\delta = 7.71$  (s, 1H, C=CH), 7.68 (d,  $J = 7.5$  Hz, 2H, ArH), 7.53 (t,  $J = 7.4$  Hz, 1H, ArH), 7.47 (t,  $J = 7.5$  Hz, 2H, ArH), 7.34 (d,  $J = 8.1$  Hz, 2H, ArH), 7.15 (d,  $J = 8.1$  Hz, 2H, ArH), 6.54 (s, 1H, OH), 5.49 (s, 1H, OH), 2.37 (d,  $J = 11.2$  Hz, 2H,  $\text{CH}_2$ ), 2.27 (s, 3H,  $\text{ArCH}_3$ ), 2.21 (d,  $J = 12.4$  Hz, 1H, C-CH), 1.78–1.69 (m, 2H,  $\text{CH}_2$ ), 0.97 (d,  $J = 6.0$  Hz, 3H,  $\text{CCH}_3$ );  $^{13}\text{C NMR}$  (150 MHz,  $\text{DMSO-}d_6$ )  $\delta = 206.4$ , 187.5, 150.4, 139.8, 136.5, 134.4, 131.3, 129.9, 129.9, 128.8, 128.8, 128.6, 128.6, 121.7, 121.7, 118.3, 102.6, 83.6, 46.9, 44.2, 30.4, 21.5, 20.9; HRMS (TOF ES+):  $m/z$  calcd for  $\text{C}_{23}\text{H}_{24}\text{NO}_4$   $[(\text{M}+\text{H})^+]$ , 378.1700, found, 378.1763.

### 3-Benzoyl-3a,7a-dihydroxy-6-phenyl-1-(*p*-tolyl)-1,3a,5,6,7,7a-hexahydro-4H-indol-4-one (3i')

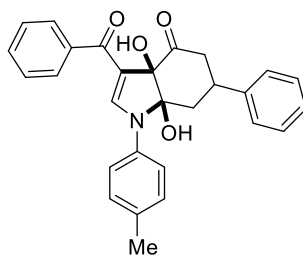

$V_{\text{Petroleum ether}}/V_{\text{Ethyl acetate}} = 1:2$ ,  $R_f = 0.2$ ; Yellow solid: 165 mg (75%); mp = 100–101°C;  $^1\text{H NMR}$  (600 MHz,  $\text{DMSO-}d_6$ )  $\delta = 7.75$  (d,  $J = 8.3$  Hz, 3H,  $\text{ArH}+\text{C}=\text{CH}$ ), 7.54 (d,  $J = 7.3$  Hz, 1H, ArH), 7.49 (t,  $J = 7.5$  Hz, 2H, ArH), 7.34 (d,  $J = 7.9$  Hz, 2H, ArH), 7.29–7.27 (m, 4H, ArH), 7.22–7.20 (m, 1H, ArH), 7.12 (d,  $J = 8.0$  Hz, 2H, ArH), 6.76 (s, 1H, OH), 5.64 (s, 1H, OH), 3.03–2.83 (m, 1H, C-CH), 2.52 (d,  $J = 23.6$  Hz, 3H,  $\text{CH}_2$ ), 2.28 (d,  $J = 18.0$  Hz, 1H,  $\text{CH}_2$ ), 2.24 (s, 3H,  $\text{ArCH}_3$ );  $^{13}\text{C NMR}$  (150 MHz,  $\text{DMSO-}d_6$ )  $\delta = 205.9$ , 187.6, 150.6, 143.1, 139.8, 136.5, 134.5, 131.3, 129.9, 129.9, 129.1, 129.1, 128.8, 128.8, 128.7, 128.7, 127.3, 127.2, 127.2, 121.8, 121.8, 118.4, 102.1, 83.9, 45.9, 44.3, 40.4, 20.9; HRMS (TOF ES+):  $m/z$  calcd for  $\text{C}_{28}\text{H}_{26}\text{NO}_4$   $[(\text{M}+\text{H})^+]$ , 440.1856, found, 440.1868.

### 3-Benzoyl-3a,7a-dihydroxy-7,7-dimethyl-1-(*p*-tolyl)-1,3a,5,6,7,7a-hexahydro-4H-indol-4-one (3j')

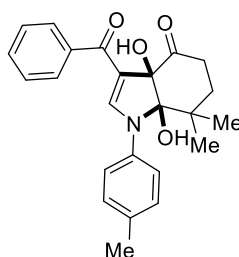

$V_{\text{Petroleum ether}}/V_{\text{Ethyl acetate}} = 1:2$ ,  $R_f = 0.2$ ; Yellow oil: 151 mg (77%);  $^1\text{H NMR}$  (600 MHz,  $\text{DMSO-}d_6$ )  $\delta = 7.68\text{--}7.66$  (m, 3H, ArH+C=CH), 7.52–7.46 (m, 3H, ArH), 7.35–7.33 (m, 2H, ArH), 7.16–7.14 (m, 2H, ArH), 6.44 (s, 1H, OH), 5.57 (s, 1H, OH), 2.62 (d,  $J = 11.8$  Hz, 1H,  $\text{CH}_2$ ), 2.27 (s, 3H, Ar $\text{CH}_3$ ), 2.16–1.90 (m, 3H,  $\text{CH}_2$ ), 0.98 (s, 3H,  $\text{CCH}_3$ ), 0.84 (s, 3H,  $\text{CCH}_3$ );  $^{13}\text{C NMR}$  (150 MHz,  $\text{DMSO-}d_6$ )  $\delta = 206.3, 187.1, 150.0, 139.5, 136.1, 134.1, 130.9, 129.5, 129.5, 128.5, 128.5, 128.3, 128.3, 121.6, 121.6, 118.1, 102.6, 83.1, 50.9, 47.7, 35.1, 31.7, 25.4, 20.5$ ; HRMS (TOF ES<sup>+</sup>):  $m/z$  calcd for  $\text{C}_{24}\text{H}_{26}\text{NO}_4$  [(M+H)<sup>+</sup>], 392.1856, found, 392.1857.

**3-Benzoyl-3a,7a-dihydroxy-1-(*p*-tolyl)-1,3a,5,6,7,7a-hexahydro-4*H*-indol-4-one (3k')**

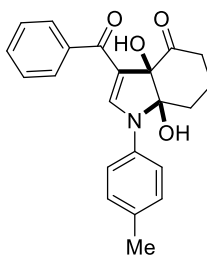

$V_{\text{Petroleum ether}}/V_{\text{Ethyl acetate}} = 1:2$ ,  $R_f = 0.2$ ; White solid: 155 mg (85%); mp = 151–152°C;  $^1\text{H NMR}$  (600 MHz,  $\text{DMSO-}d_6$ )  $\delta = 7.80$  (s, 1H, C=CH), 7.64 (d,  $J = 7.4$  Hz, 2H, ArH), 7.53 (t,  $J = 7.2$  Hz, 1H, ArH), 7.46 (t,  $J = 7.4$  Hz, 2H, ArH), 7.39 (d,  $J = 8.2$  Hz, 2H, ArH), 7.15 (d,  $J = 8.2$  Hz, 2H, ArH), 6.68 (s, 1H, OH), 5.54 (s, 1H, OH), 2.57–2.53 (m, 1H,  $\text{CH}_2$ ), 2.41–2.36 (m, 1H,  $\text{CH}_2$ ), 2.27 (s, 3H, Ar $\text{CH}_3$ ), 2.00–1.96 (m, 1H,  $\text{CH}_2$ ), 1.86–1.81 (m, 1H,  $\text{CH}_2$ ), 1.71–1.67 (m, 1H,  $\text{CH}_2$ ), 1.60–1.54 (m, 1H,  $\text{CH}_2$ );  $^{13}\text{C NMR}$  (150 MHz,  $\text{DMSO-}d_6$ )  $\delta = 207.9, 187.5, 151.7, 140.0, 136.4, 134.7, 131.3, 130.0, 130.0, 128.9, 128.9, 128.6, 128.6, 122.0, 122.0, 116.5, 101.4, 84.4, 37.4, 34.3, 20.9, 19.3$ ; HRMS (TOF ES<sup>+</sup>):  $m/z$  calcd for  $\text{C}_{22}\text{H}_{22}\text{NO}_4$  [(M+H)<sup>+</sup>], 364.1543, found, 364.1545.

**3-Benzoyl-3a,8a-dihydroxy-1-(*p*-tolyl)-3a,5,6,7,8,8a-hexahydrocyclohepta[*b*]pyrrol-4(1*H*)-one (3l')**

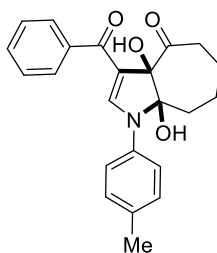

$V_{\text{Petroleum ether}}/V_{\text{Ethyl acetate}} = 1:3$ ,  $R_f = 0.2$ ; Yellow oil: 80 mg (42%);  $^1\text{H NMR}$  (600 MHz,  $\text{DMSO-}d_6$ )  $\delta = 7.79$  (s, 1H, C=CH), 7.56–7.46 (m, 5H, ArH), 7.42–7.37 (m, 3H, ArH), 7.30 (s, 1H, ArH), 7.28 (s, 1H, OH), 6.47 (s, 1H, OH), 2.35 (s, 3H, Ar $\text{CH}_3$ ), 2.10–2.02 (m, 1H,  $\text{CH}_2$ ), 1.82–1.76 (m, 1H,  $\text{CH}_2$ ), 1.71–1.63 (m, 2H,  $\text{CH}_2$ ), 1.53 (d,  $J = 12.1$  Hz, 1H,  $\text{CH}_2$ ), 1.42–1.34 (m, 2H,  $\text{CH}_2$ ), 1.23–1.16 (m, 1H,  $\text{CH}_2$ );  $^{13}\text{C NMR}$  (150 MHz,  $\text{DMSO-}d_6$ )  $\delta = 209.8, 187.3, 152.3, 134.0, 137.0, 135.0, 131.4, 130.1, 130.1, 128.6, 128.6, 128.2, 128.2, 122.6, 122.6, 116.5, 95.4, 87.6, 36.0, 26.7, 22.1, 20.9, 14.6$ ; HRMS (TOF ES<sup>+</sup>):  $m/z$  calcd for  $\text{C}_{23}\text{H}_{24}\text{NO}_4$  [(M+H)<sup>+</sup>], 378.1700, found, 378.1706.

**4-(4-Benzoyl-3-hydroxy-1-phenyl-1*H*-pyrrol-2-yl)-3,3-dimethylbutanoic acid (4a)**

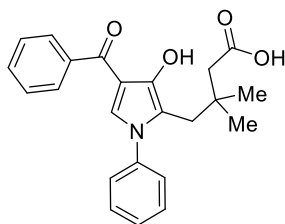

$V_{\text{Petroleum ether}}/V_{\text{Ethyl acetate}} = 1:3$ ,  $R_f = 0.2$ ; Yellow solid: 55 mg (76%); mp = 140–141 °C;  $^1\text{H NMR}$  (600 MHz,  $\text{DMSO-}d_6$ )  $\delta = 11.92$  (br, 1H, OH), 8.97 (br, 1H, COOH), 7.88 (d,  $J = 7.6$  Hz, 2H, ArH), 7.61 (t,  $J = 7.4$  Hz, 1H, ArH), 7.51 (d,  $J = 7.7$  Hz, 4H, ArH), 7.44 (d,  $J = 8.1$  Hz, 3H, ArH), 7.29 (s, 1H, C=CH), 2.69 (s, 2H,  $\text{CH}_2$ ), 1.93 (s, 2H,  $\text{CH}_2$ ), 0.67 (s, 6H,  $\text{CCH}_3$ );  $^{13}\text{C NMR}$  (150 MHz,  $\text{DMSO-}d_6$ )  $\delta = 192.4$ , 173.5, 145.6, 139.8, 138.9, 132.5, 129.8, 129.8, 129.1, 129.1, 128.9, 128.9, 128.5, 127.0, 127.0, 125.9, 114.2, 111.6, 46.2, 35.9, 34.9, 27.0, 27.0; HRMS (TOF ES+): m/z calcd for  $\text{C}_{23}\text{H}_{25}\text{NO}_4$  [(M+H) $^+$ ], 378.1700, found, 378.1705.

**4-(4-([1,1'-Biphenyl]-4-carbonyl)-3-hydroxy-1-(*p*-tolyl)-1*H*-pyrrol-2-yl)-3,3-dimethylbutanoic acid (4b)**

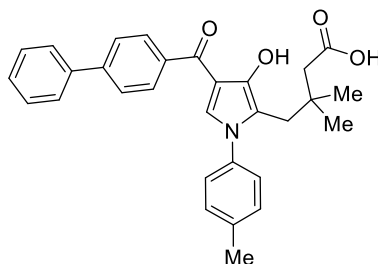

$V_{\text{Petroleum ether}}/V_{\text{Ethyl acetate}} = 1:3$ ,  $R_f = 0.2$ ; Yellow solid: 66 mg (73%); mp = 165–166 °C;  $^1\text{H NMR}$  (600 MHz,  $\text{DMSO-}d_6$ )  $\delta = 11.94$  (br, 1H, OH), 9.08 (br, 1H, COOH), 7.97 (d,  $J = 8.0$  Hz, 2H, ArH), 7.81 (d,  $J = 8.3$  Hz, 2H, ArH), 7.73 (d,  $J = 7.7$  Hz, 2H, ArH), 7.50 (t,  $J = 7.6$  Hz, 2H, ArH), 7.42 (t,  $J = 7.3$  Hz, 1H, ArH), 7.32 (s, 4H), 7.30 (s, 1H, C=CH), 2.68 (s, 2H,  $\text{CH}_2$ ), 2.37 (s, 3H,  $\text{ArCH}_3$ ), 1.94 (s, 2H,  $\text{CH}_2$ ), 0.69 (s, 6H,  $\text{CCH}_3$ );  $^{13}\text{C NMR}$  (150 MHz,  $\text{DMSO-}d_6$ )  $\delta = 191.3$ , 173.3, 145.1, 143.6, 139.2, 137.5, 137.4, 137.0, 129.8, 129.8, 129.3, 129.3, 129.2, 129.2, 128.3, 127.0, 127.0, 126.9, 126.9, 126.4, 126.4, 125.4, 113.9, 111.2, 46.0, 35.6, 34.5, 26.7, 26.7, 20.7; HRMS (TOF ES+): m/z calcd for  $\text{C}_{30}\text{H}_{31}\text{NO}_4$  [(M+H) $^+$ ], 468.2169, found, 468.2177.

**4-(4-Benzoyl-3-hydroxy-5-phenyl-1-(*p*-tolyl)-1*H*-pyrrol-2-yl)-3,3-dimethylbutanoic acid (4c)**

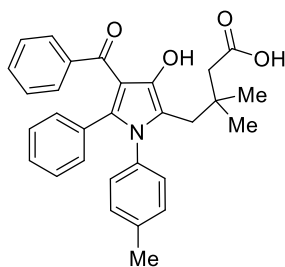

$V_{\text{Petroleum ether}}/V_{\text{Ethyl acetate}} = 1:4$ ,  $R_f = 0.2$ ; Yellow solid: 57 mg (64%); mp = 199–200 °C;  $^1\text{H NMR}$  (600 MHz,  $\text{DMSO-}d_6$ )  $\delta = 11.94$  (br, 1H, OH), 8.70 (br, 1H, COOH), 7.39 (d,  $J = 7.6$  Hz, 2H, ArH), 7.26 (t,  $J = 7.4$  Hz, 1H, ArH), 7.14–7.10 (m, 3H, ArH), 7.08 (d,  $J = 7.6$  Hz, 1H, ArH), 7.01 (d,  $J =$

7.9 Hz, 2H, ArH), 6.92 (t,  $J = 7.3$  Hz, 1H, ArH), 6.86 (t,  $J = 7.5$  Hz, 2H, ArH), 6.82 (d,  $J = 7.3$  Hz, 2H, ArH), 2.57 (s, 2H, CH<sub>2</sub>), 2.25 (s, 3H, ArCH<sub>3</sub>), 1.99 (s, 2H, CH<sub>2</sub>), 0.75 (s, 6H, CCH<sub>3</sub>); <sup>13</sup>C NMR (150 MHz, DMSO-*d*<sub>6</sub>)  $\delta = 194.0, 173.4, 143.6, 138.8, 137.5, 134.9, 134.7, 131.2, 131.2, 131.2, 131.0, 129.6, 129.6, 129.17, 129.2, 128.7, 128.7, 127.5, 127.5, 127.2, 127.2, 127.1, 114.9, 111.7, 46.1, 35.4, 35.4, 27.0, 27.0, 20.7$ ; HRMS (TOF ES<sup>+</sup>):  $m/z$  calcd for C<sub>30</sub>H<sub>31</sub>NO<sub>4</sub> [(M+H)<sup>+</sup>], 468.2169, found, 468.2169.



## 5. X-ray Structure and Data<sup>3</sup> of **3i** (CCDC 2215066).

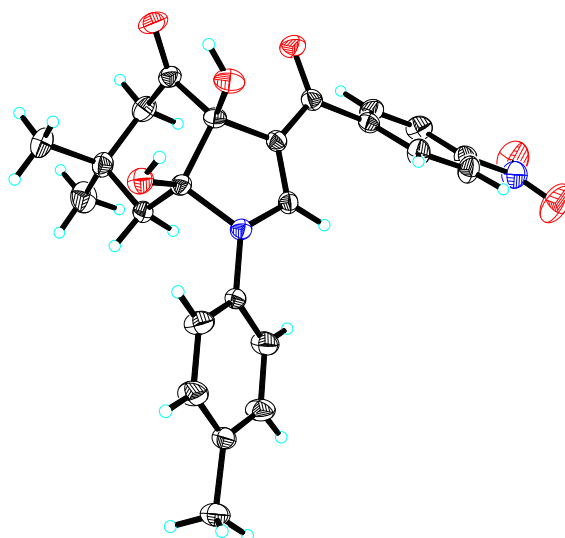

**Figure S1** X-Ray crystal structure of **3i**.

**Table S2** Crystal data and structure refinement for **3i**.

|                                   |                                                                                                                           |
|-----------------------------------|---------------------------------------------------------------------------------------------------------------------------|
| Empirical formula                 | C <sub>24</sub> H <sub>24</sub> N <sub>2</sub> O <sub>6</sub>                                                             |
| Formula weight                    | 436.45                                                                                                                    |
| Temperature                       | 296.15 K                                                                                                                  |
| Crystal system, space group       | Monoclinic, P2(1)/c                                                                                                       |
| Unit cell dimensions              | a = 17.4676(18) Å    alpha = 90 deg.<br>b = 13.5988(13) Å    beta = 93.711(2) deg.<br>c = 9.4095(10) Å    gamma = 90 deg. |
| Volume                            | 2230.4(4) Å <sup>3</sup>                                                                                                  |
| Z, Calculated density             | 4, 1.300 Mg/m <sup>3</sup>                                                                                                |
| Absorption coefficient            | 0.094 mm <sup>-1</sup>                                                                                                    |
| F(000)                            | 920.0                                                                                                                     |
| Theta range for data collection   | 2.336 to 55.112 deg.                                                                                                      |
| Limiting indices                  | -22 ≤ h ≤ 18, -11 ≤ k ≤ 17, -12 ≤ l ≤ 11                                                                                  |
| Reflections collected / unique    | 13236 / 5025 [R(int) = 0.0295]                                                                                            |
| Data/restraints/parameters        | 5025 / 0 / 293                                                                                                            |
| Goodness-of-fit on F <sup>2</sup> | 1.085                                                                                                                     |
| Final R indices [I > 2σ(I)]       | R1 = 0.0572, wR2 = 0.1393                                                                                                 |
| R indices (all data)              | R1 = 0.0888, wR2 = 0.1658                                                                                                 |
| Largest diff. peak and hole       | 0.27 and -0.37 e.Å <sup>-3</sup>                                                                                          |

**6.  $^1\text{H}$  NMR and  $^{13}\text{C}$  NMR spectra for spectroscopic data.**

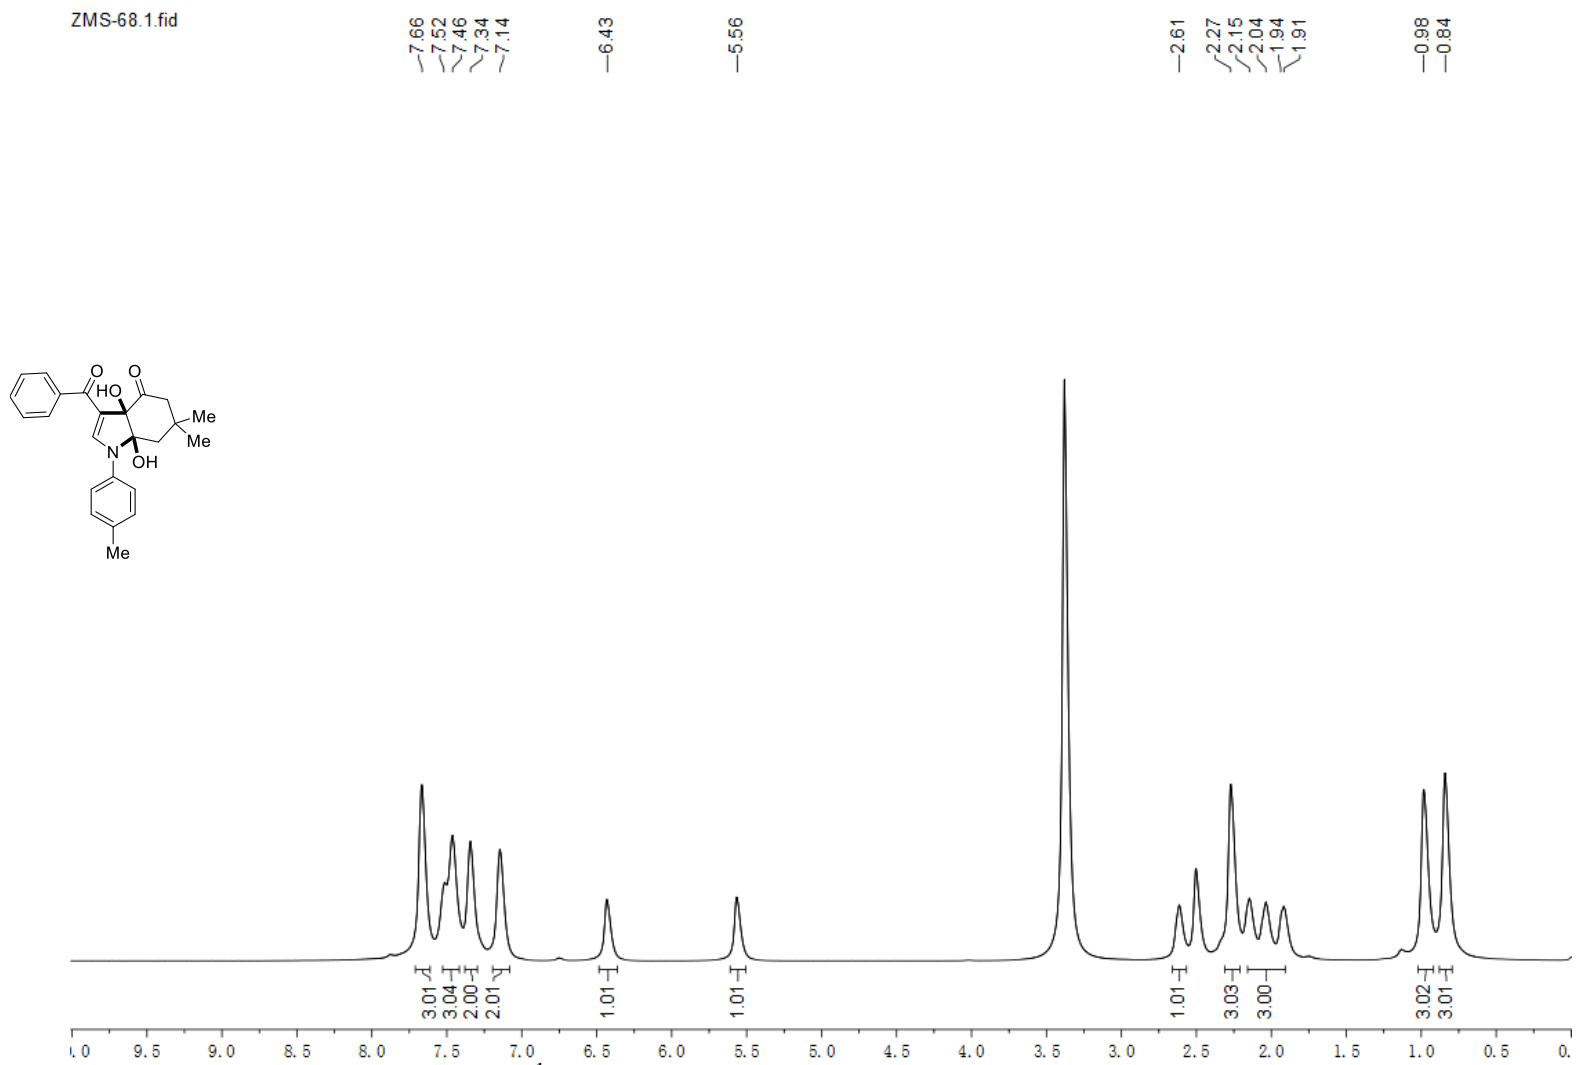

**Figure S2.**  $^1\text{H}$  NMR (600 MHz,  $\text{DMSO}-d_6$ ) spectra of compound **3a**

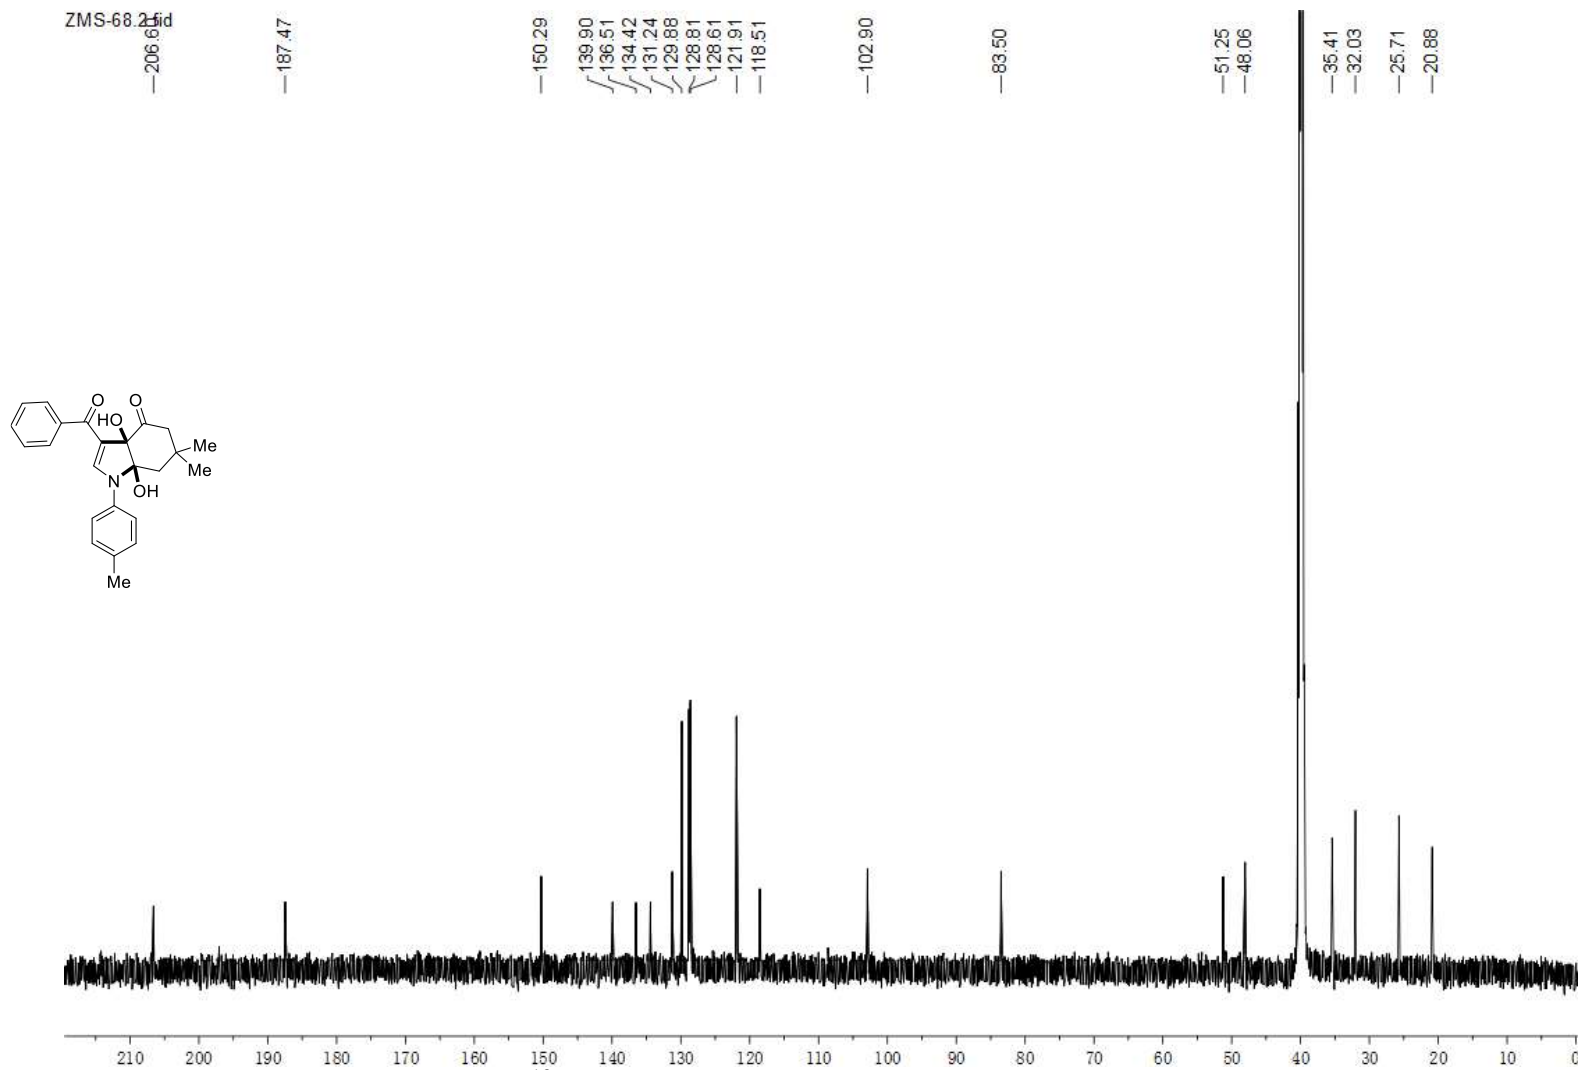

Figure S3.  $^{13}\text{C}$  NMR (150 MHz,  $\text{DMSO-}d_6$ ) spectra of compound **3a**

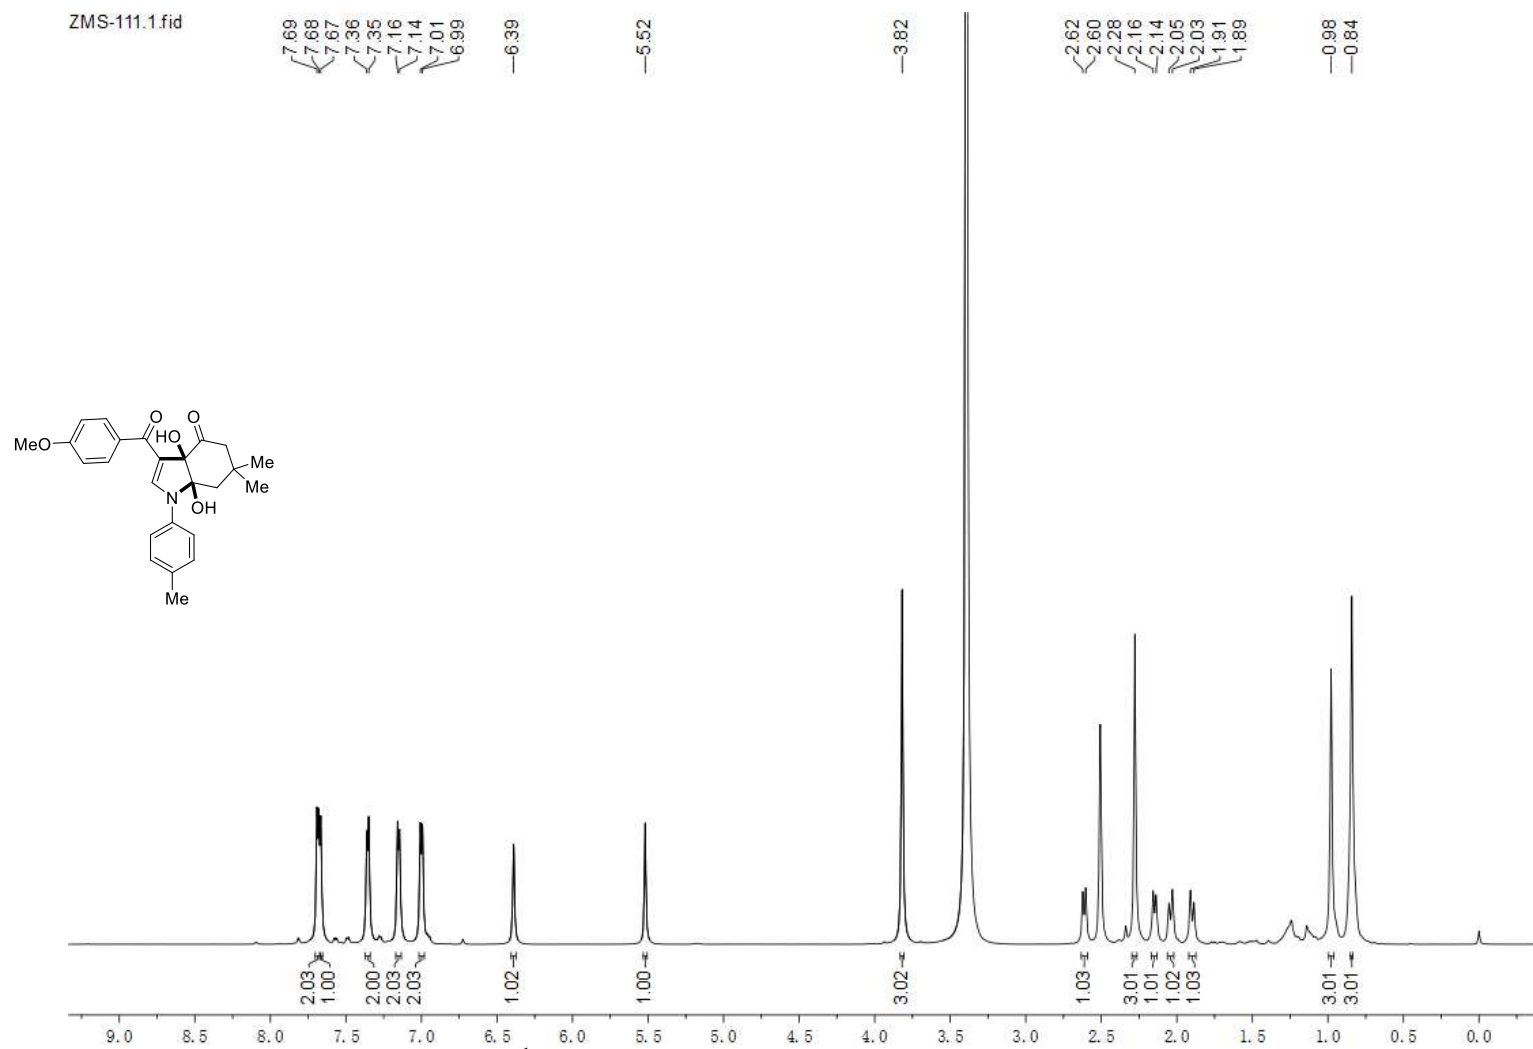

**Figure S4.**  $^1\text{H}$  NMR (600 MHz,  $\text{DMSO}-d_6$ ) spectra of compound **3b**

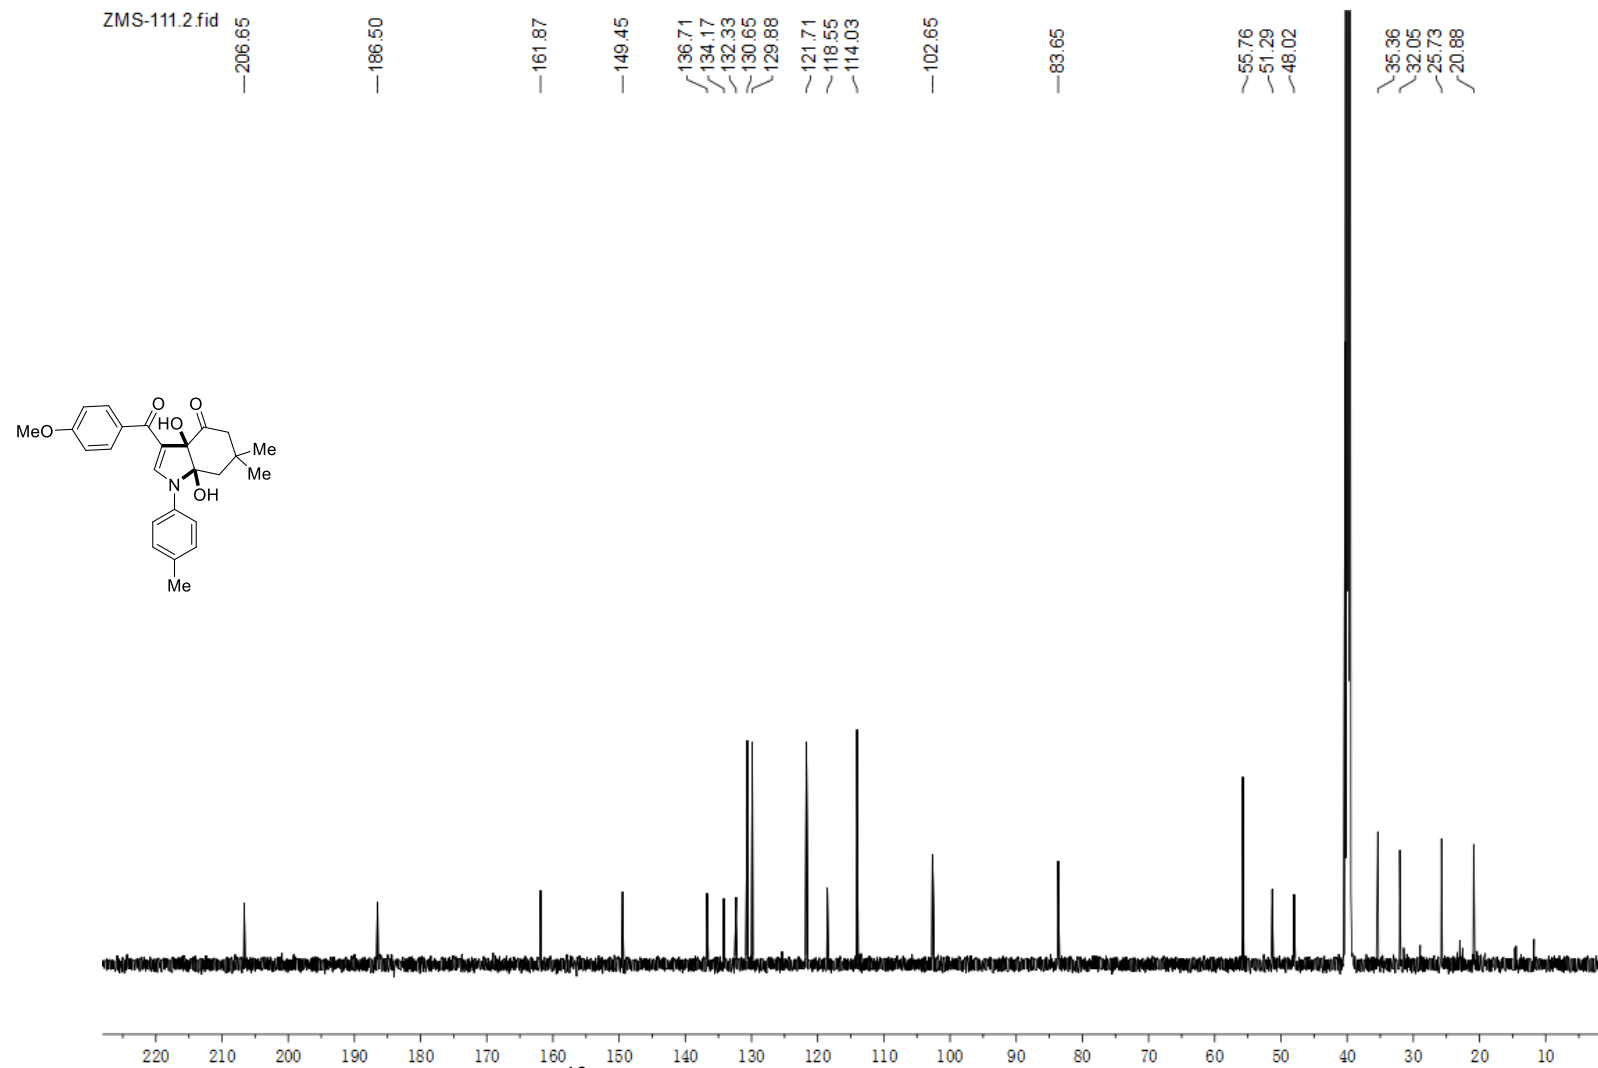

**Figure S5.**  $^{13}\text{C}$  NMR (150 MHz,  $\text{DMSO}-d_6$ ) spectra of compound **3b**

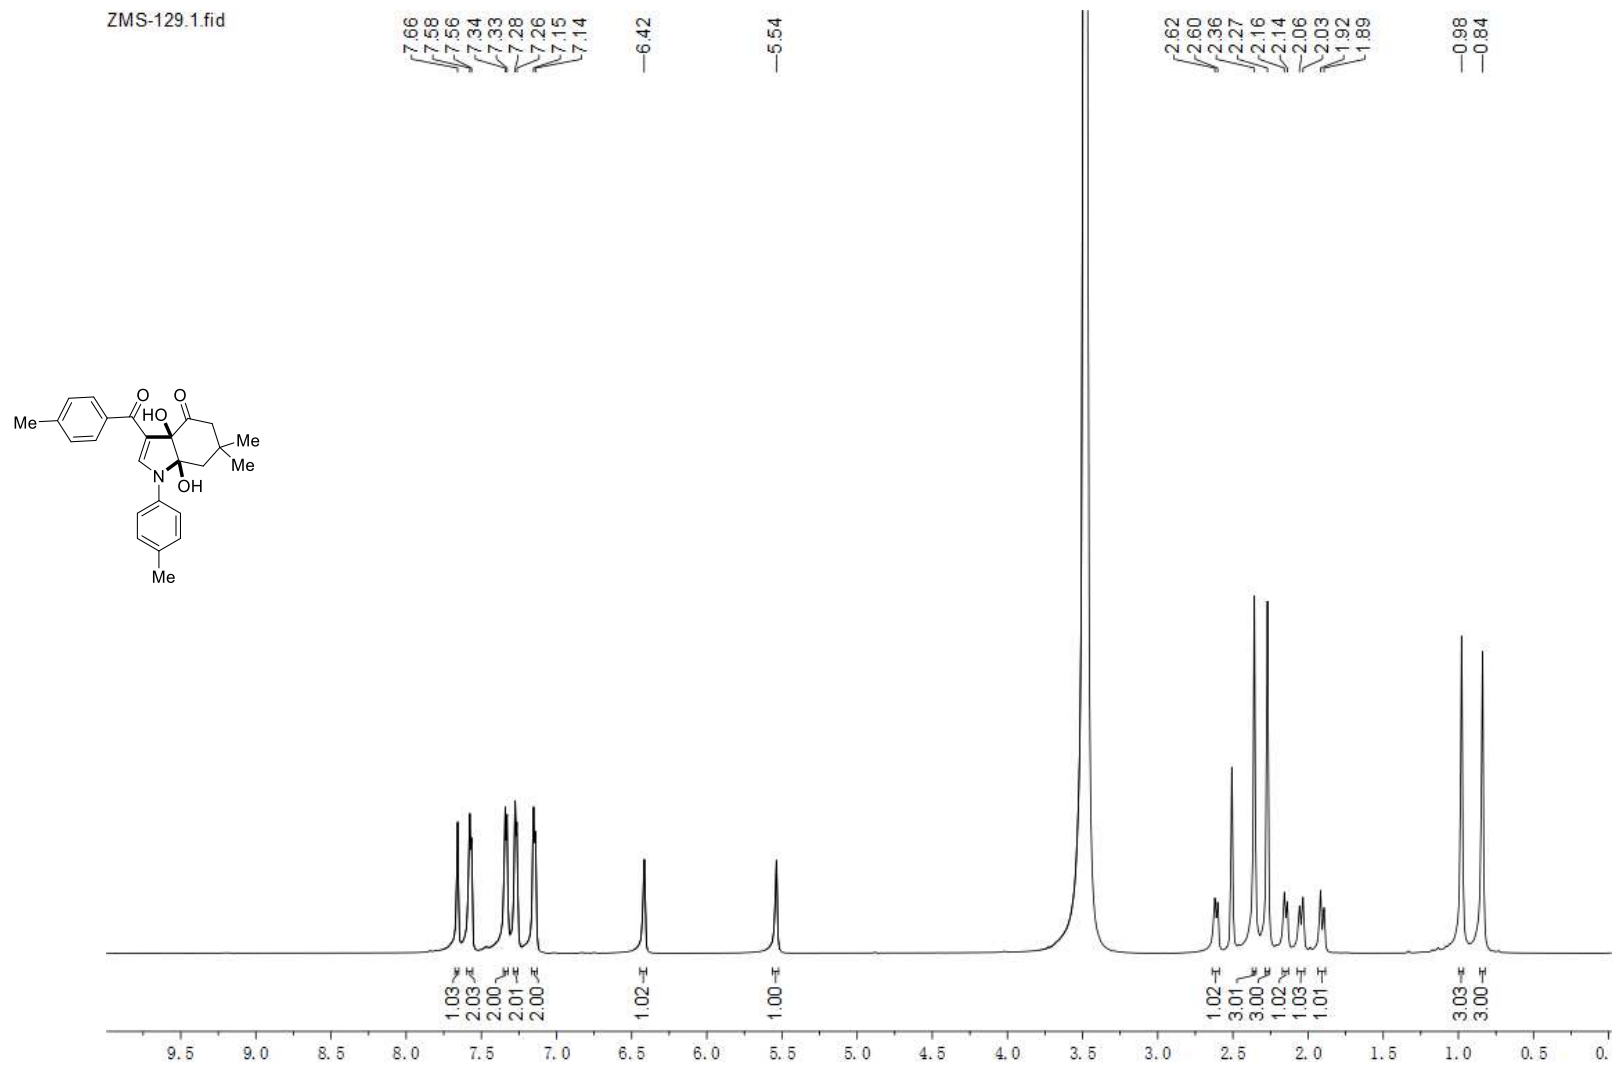

**Figure S6.**  $^1\text{H}$  NMR (600 MHz,  $\text{DMSO-}d_6$ ) spectra of compound **3c**

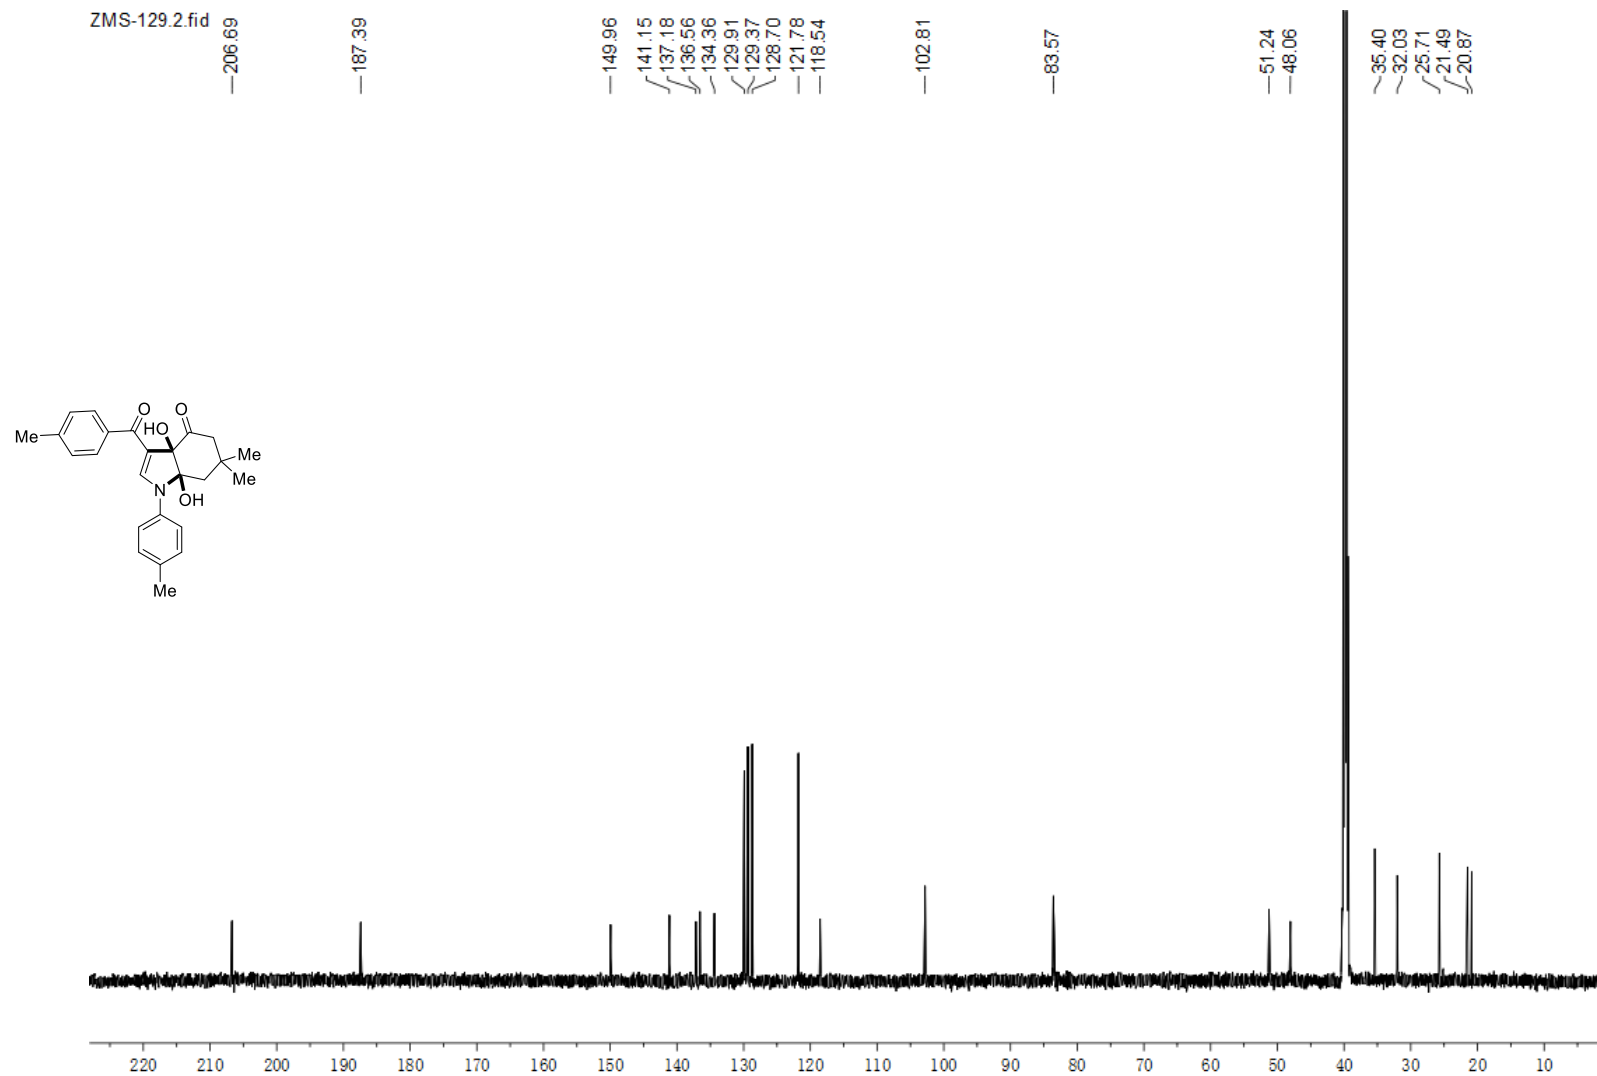

Figure S7.  $^{13}\text{C}$  NMR (150 MHz,  $\text{DMSO-}d_6$ ) spectra of compound **3c**



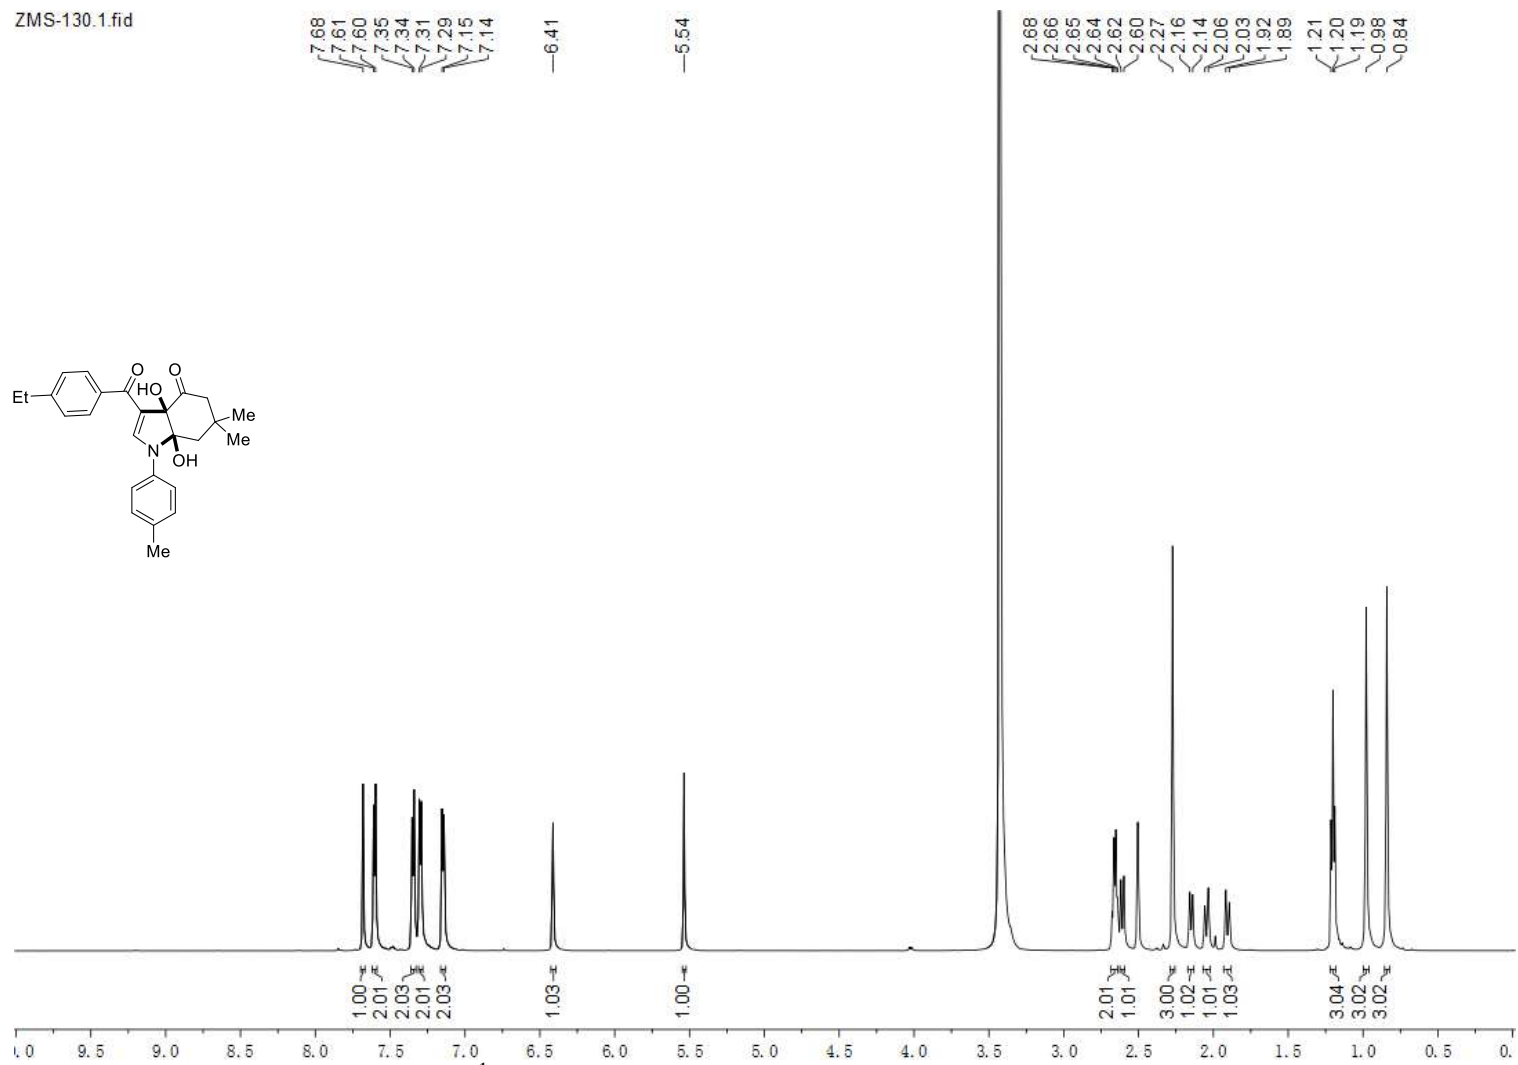

**Figure S8.**  $^1\text{H}$  NMR (600 MHz,  $\text{DMSO-}d_6$ ) spectra of compound **3d**

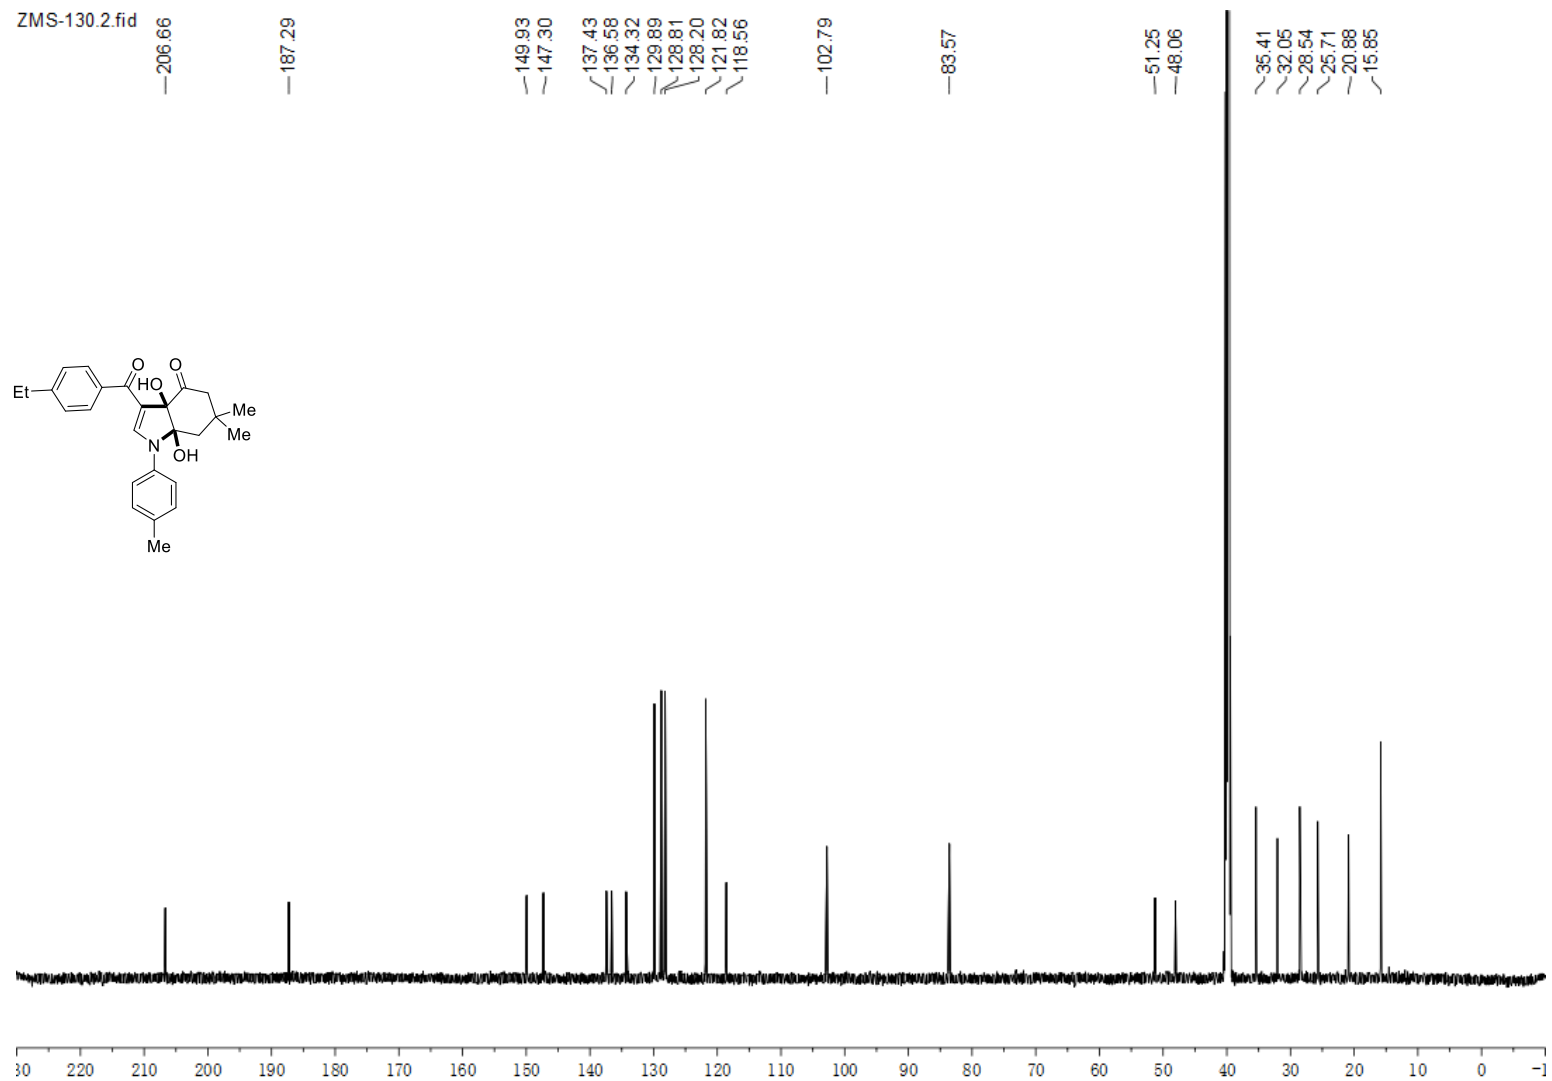

Figure S9.  $^{13}\text{C}$  NMR (150 MHz,  $\text{DMSO}-d_6$ ) spectra of compound **3d**

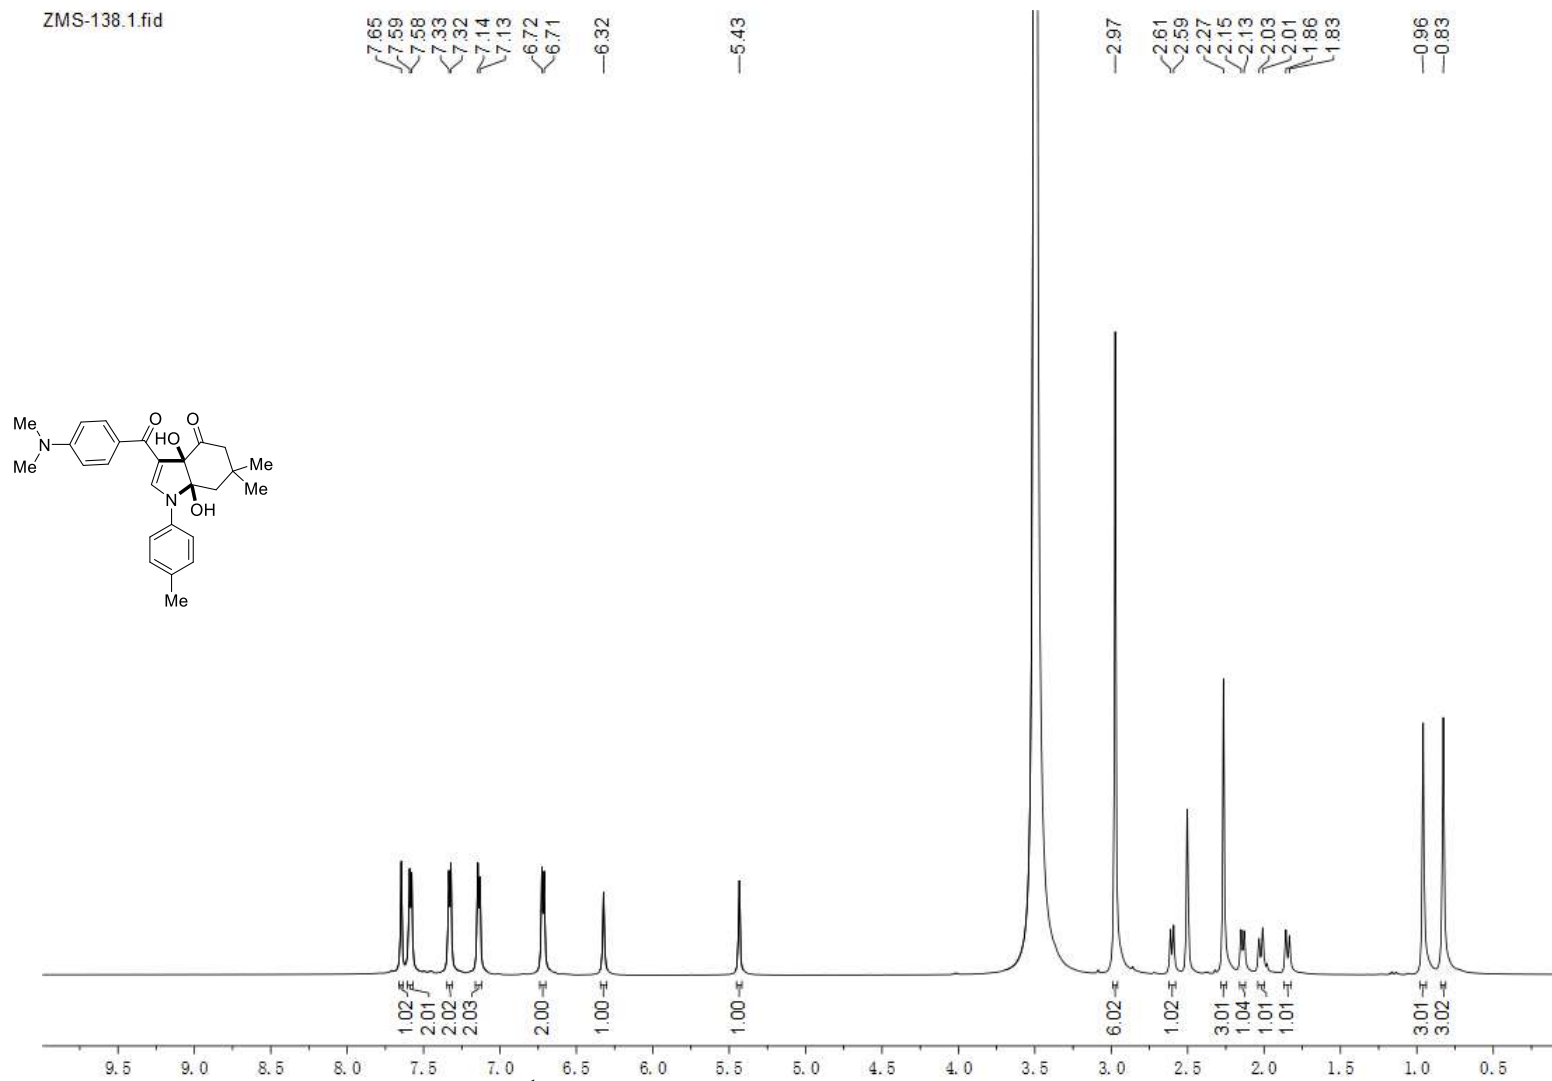

**Figure S10.**  $^1\text{H}$  NMR (600 MHz,  $\text{DMSO-}d_6$ ) spectra of compound **3e**

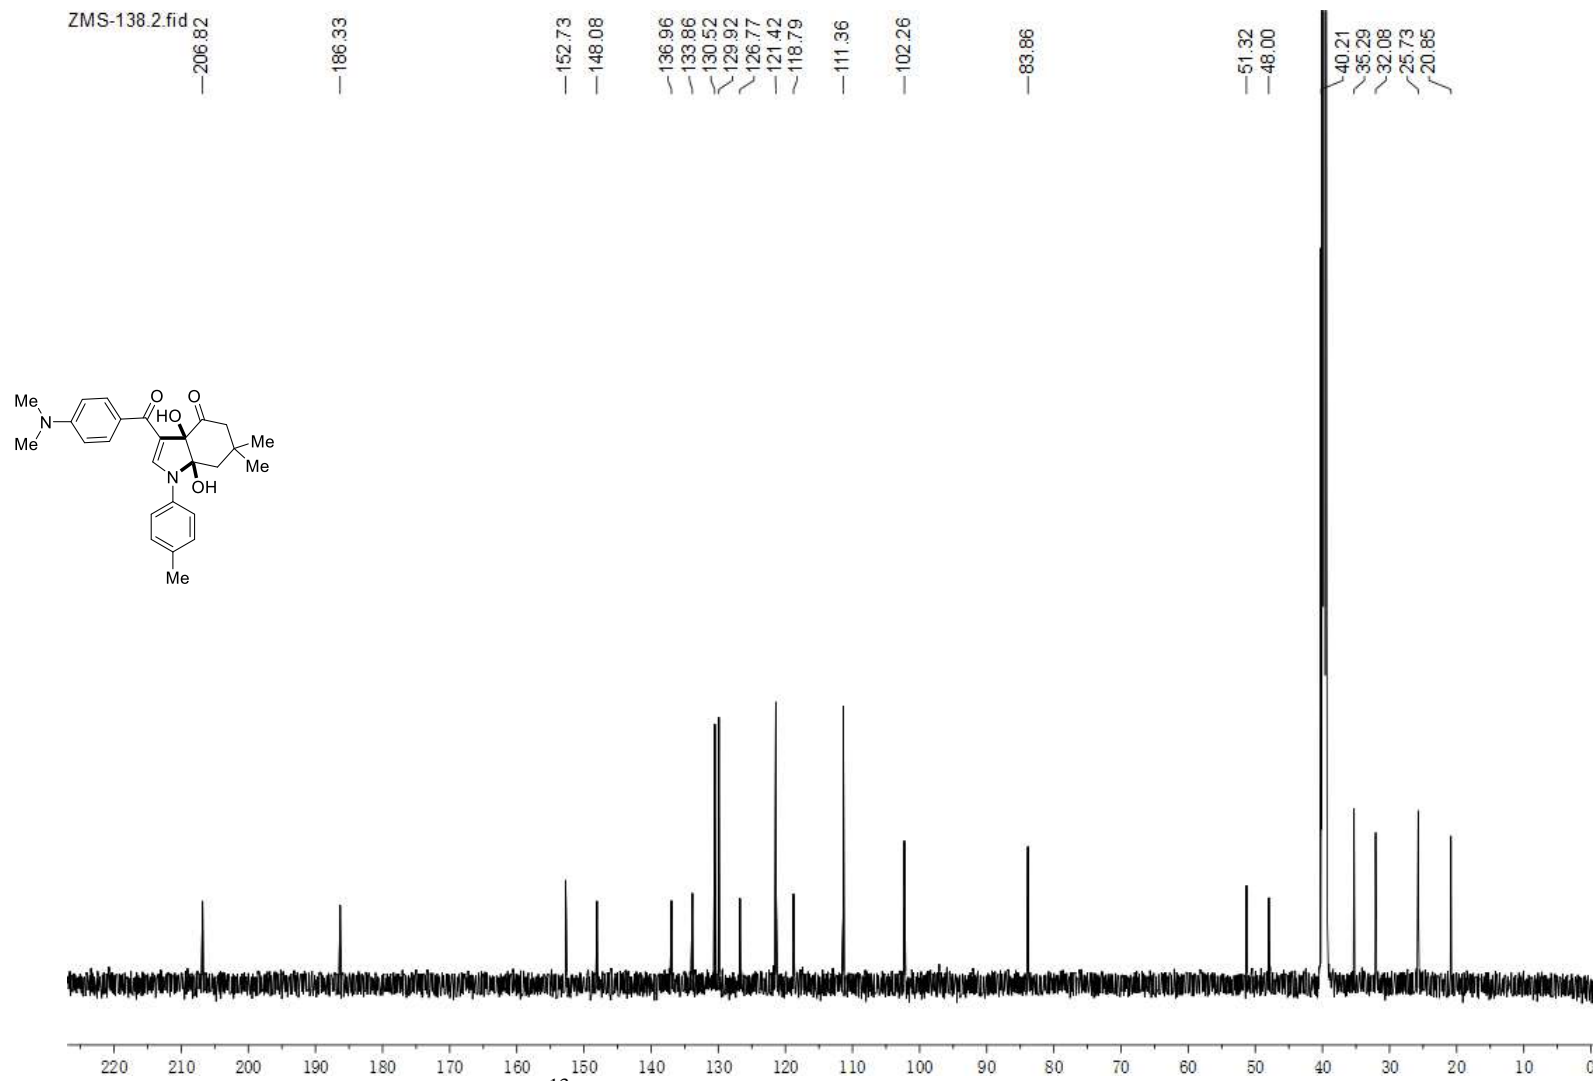

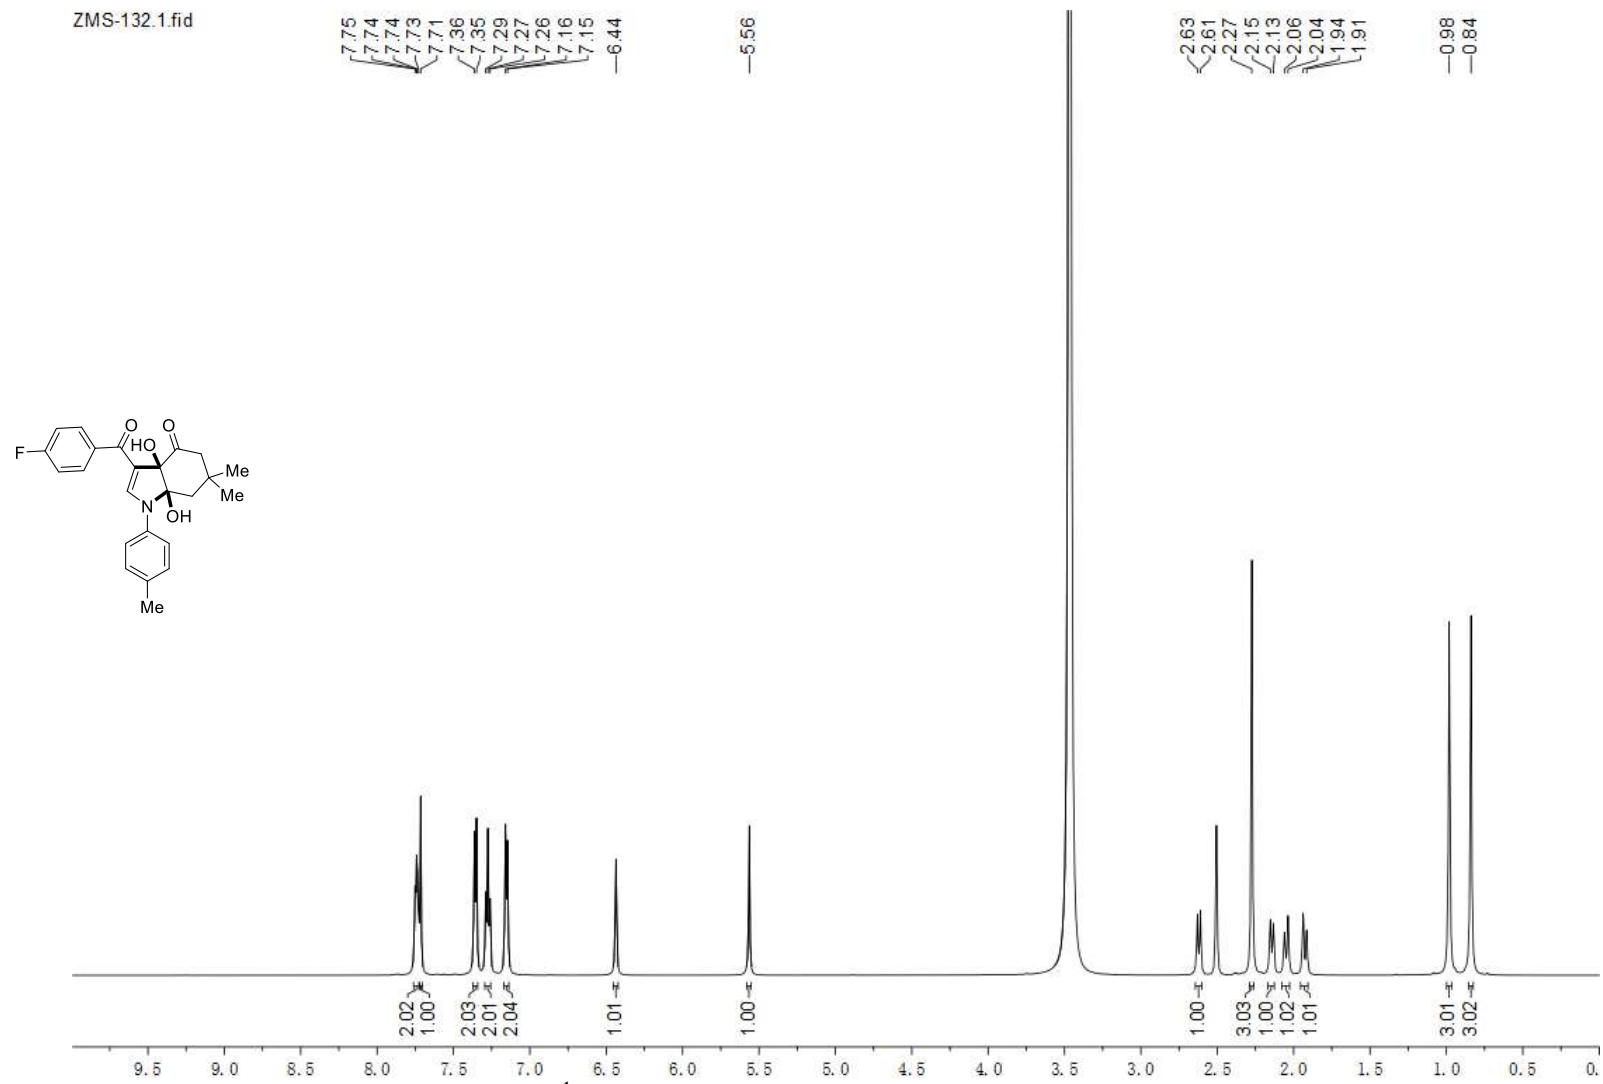

**Figure S12.**  $^1\text{H}$  NMR (600 MHz,  $\text{DMSO-}d_6$ ) spectra of compound **3f**

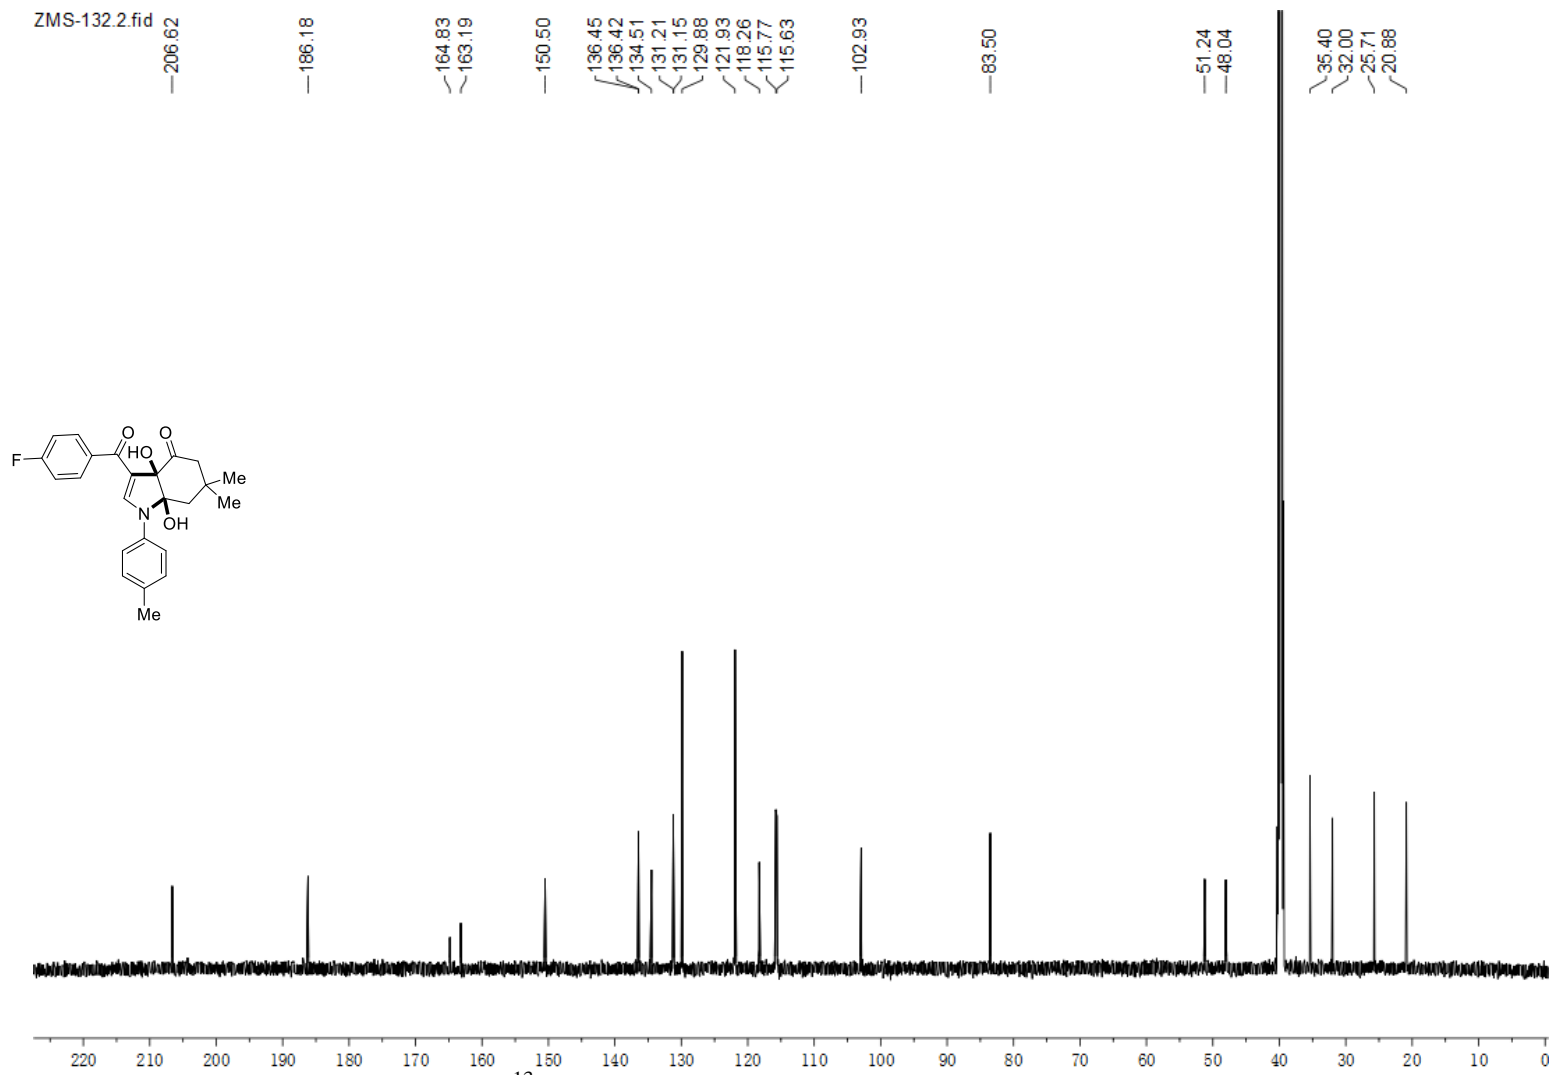

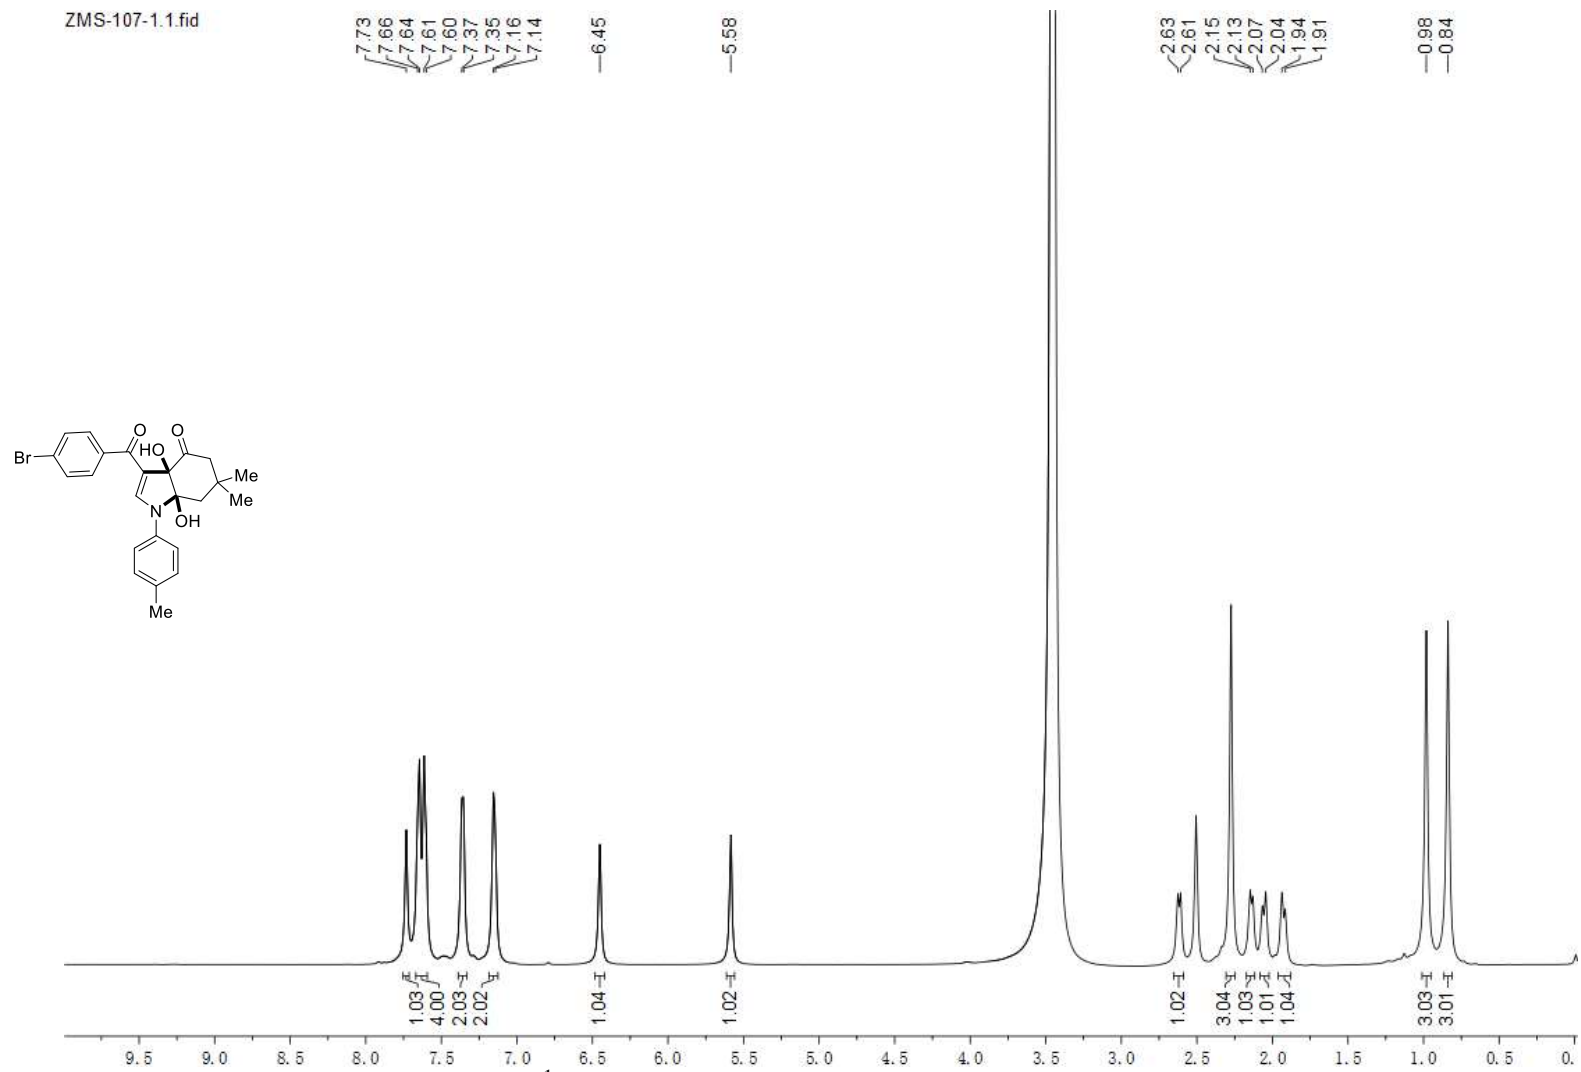

**Figure S14.**  $^1\text{H NMR}$  (600 MHz,  $\text{DMSO-}d_6$ ) spectra of compound **3g**

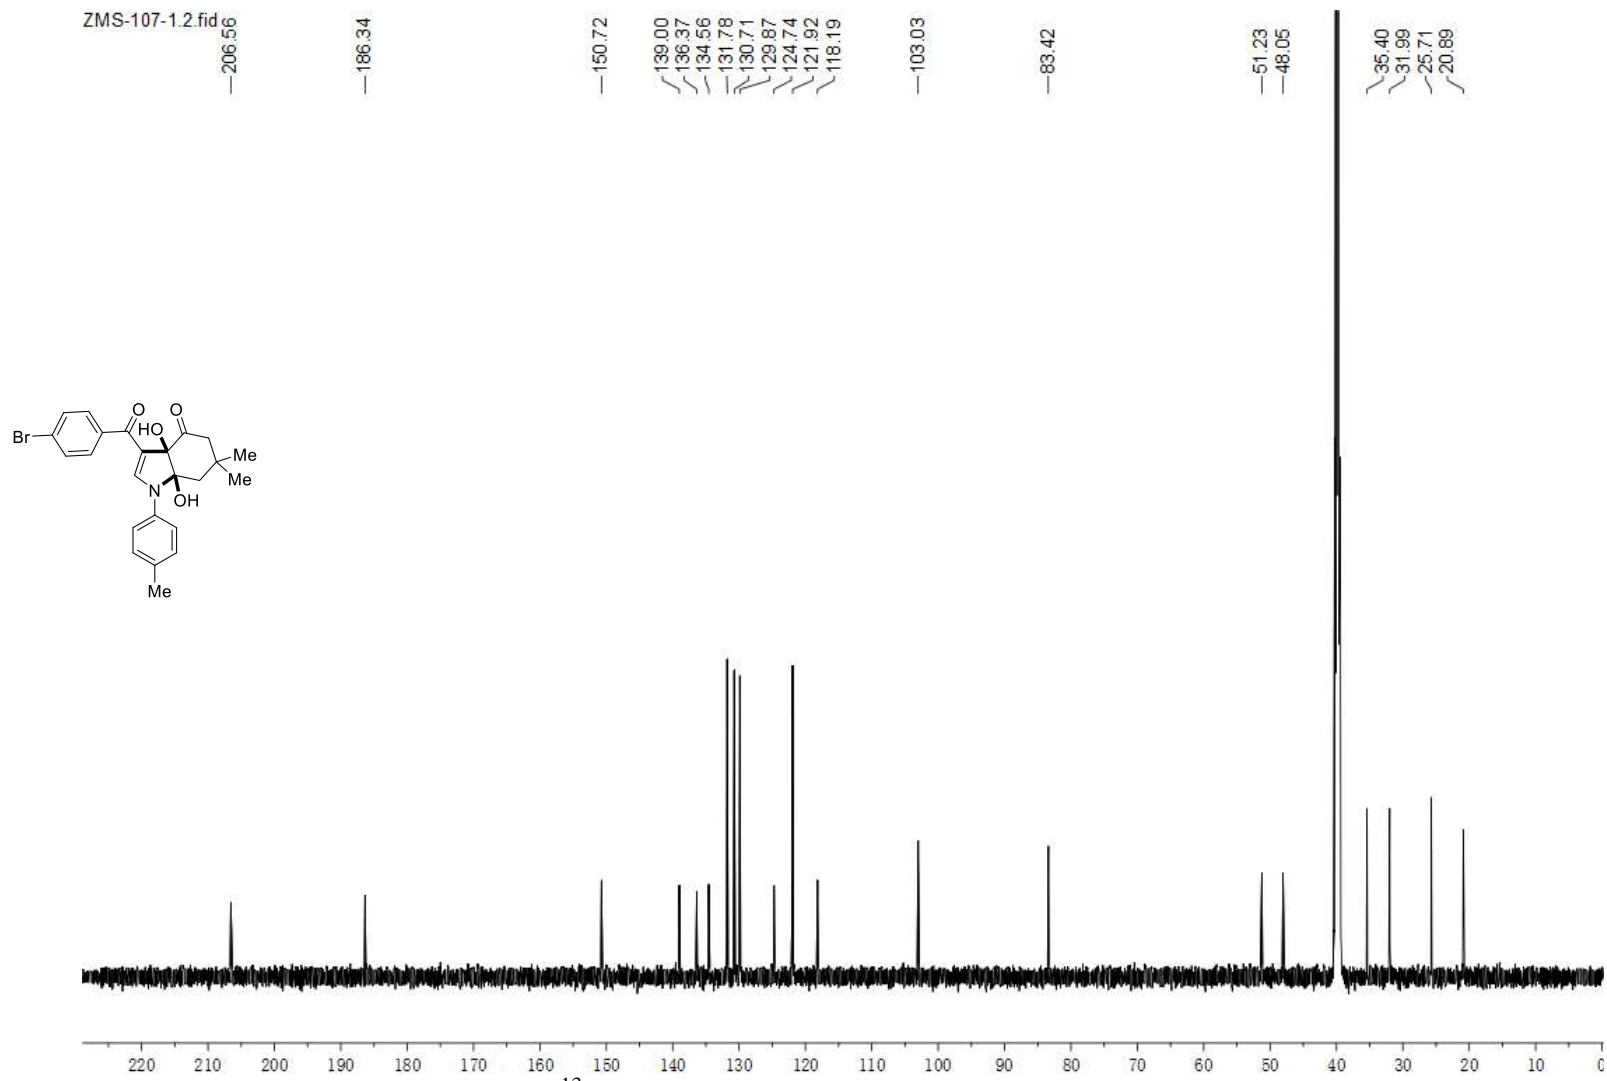

Figure S15. <sup>13</sup>C NMR (150 MHz, DMSO-*d*<sub>6</sub>) spectra of compound **3g**



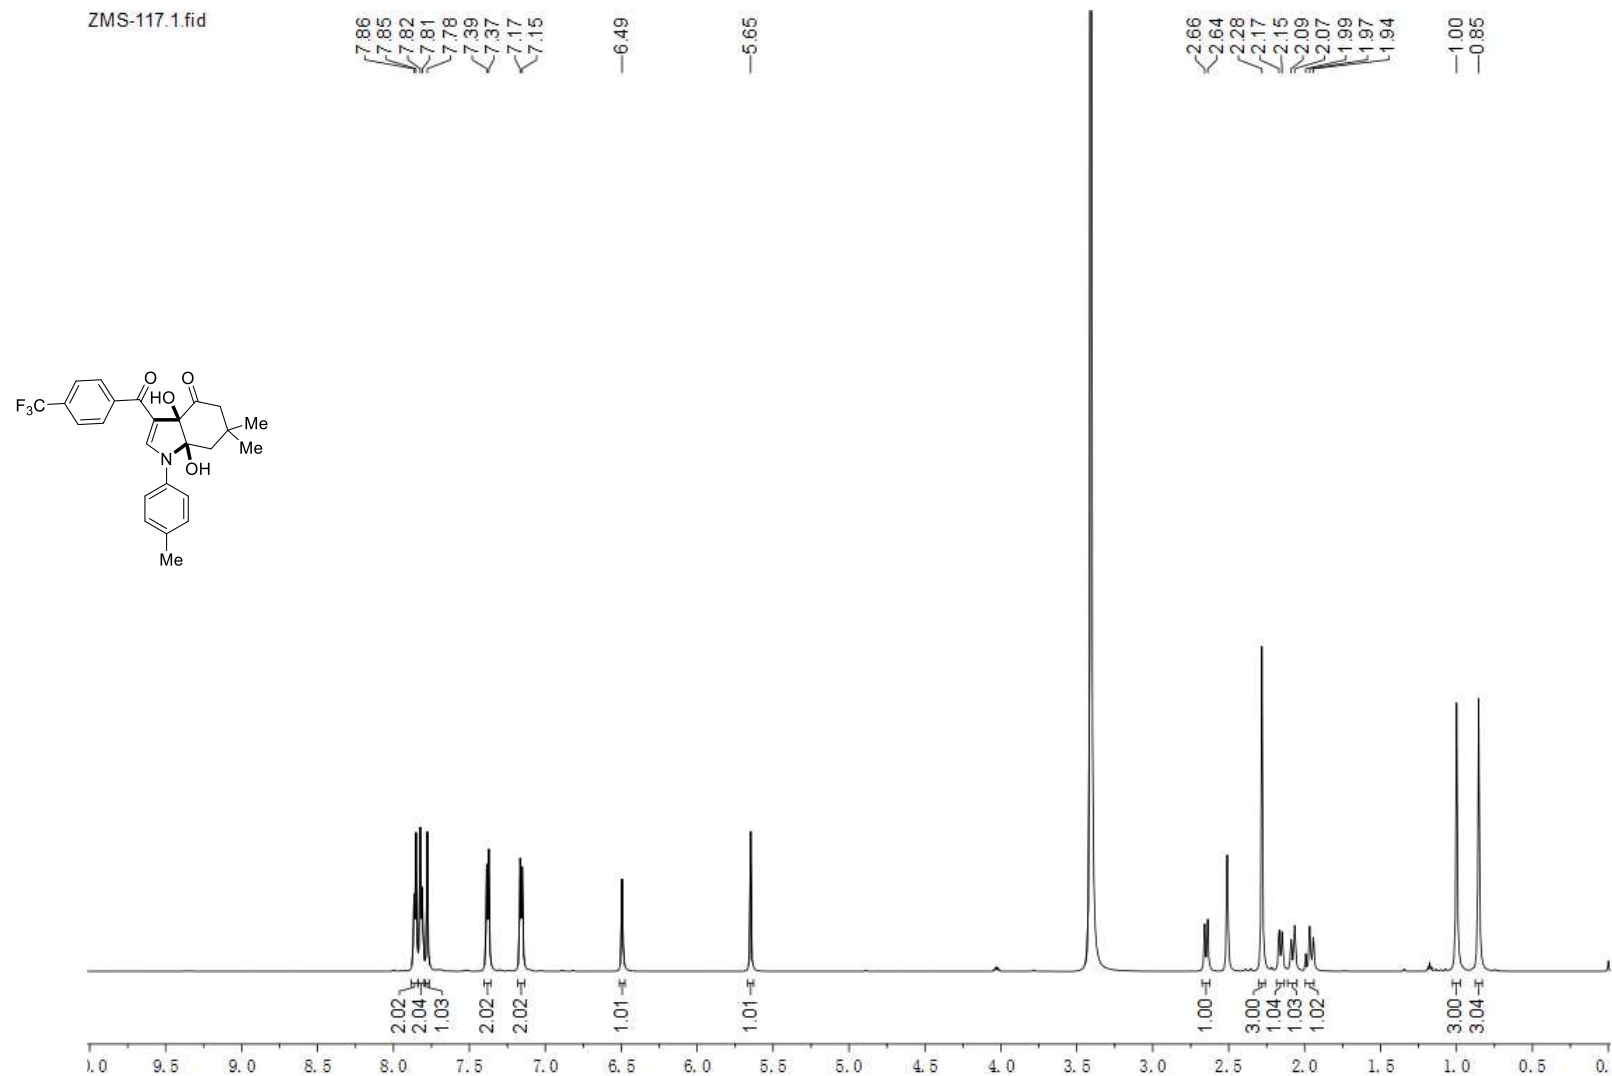

**Figure S16.**  $^1\text{H}$  NMR (600 MHz,  $\text{DMSO-}d_6$ ) spectra of compound **3h**

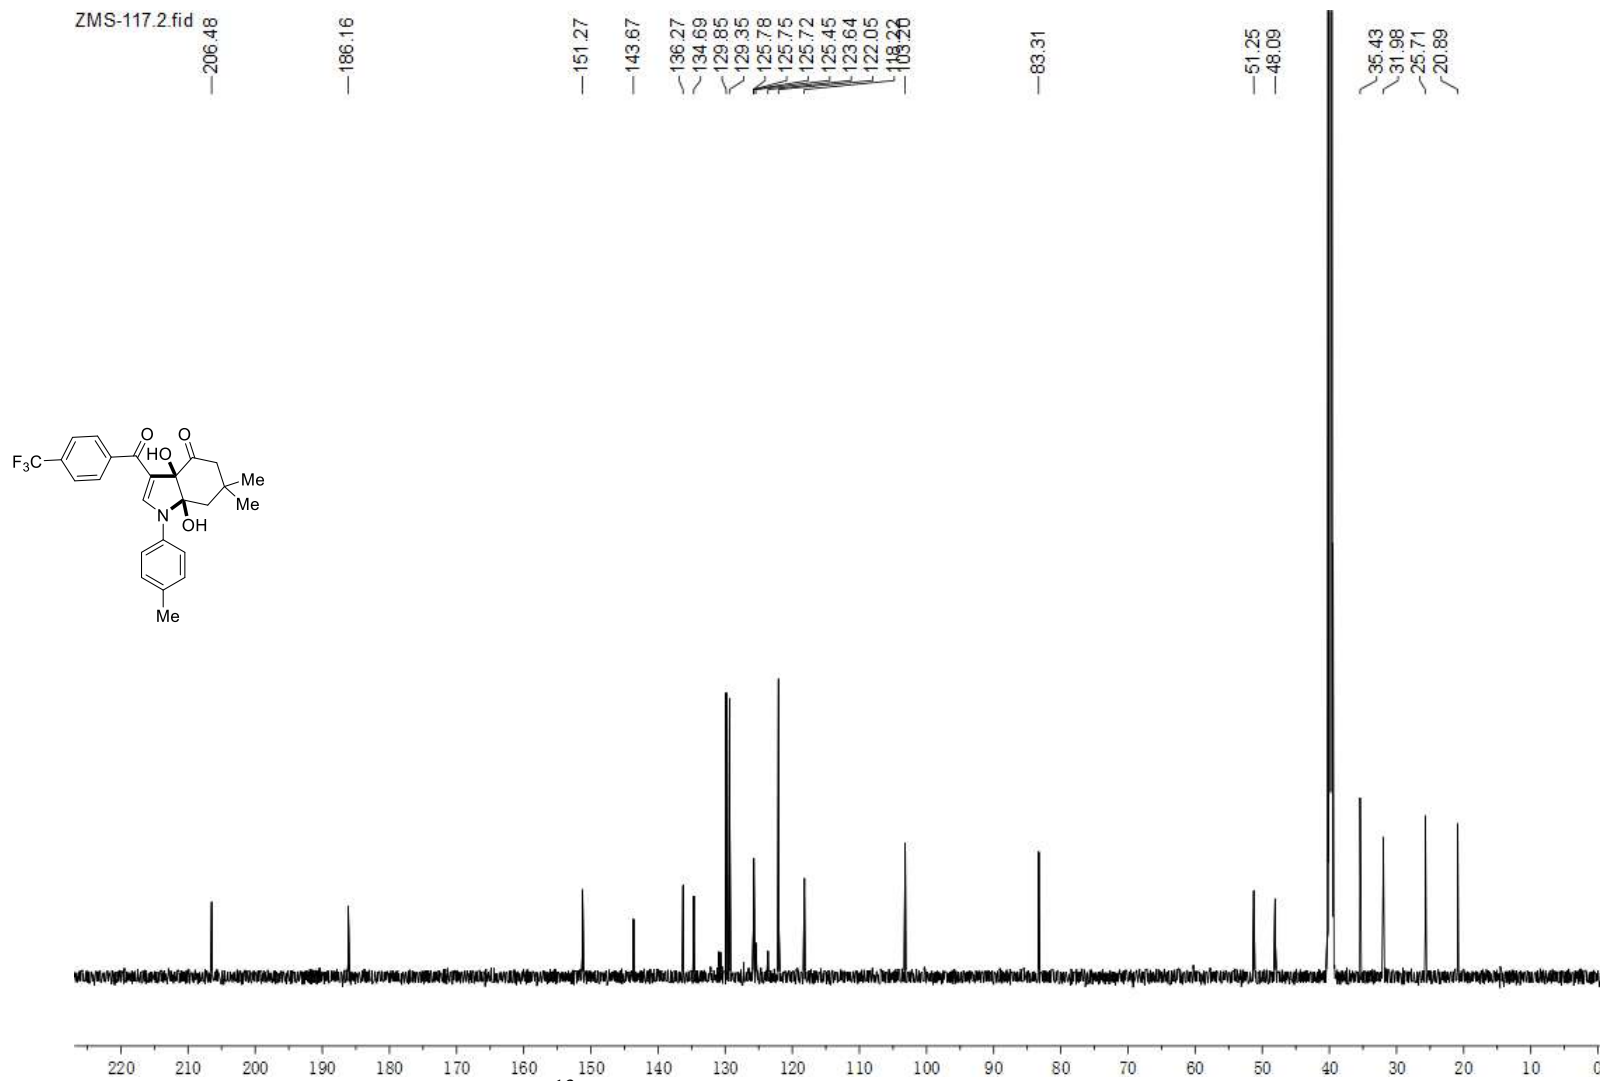

Figure S17.  $^{13}\text{C}$  NMR (150 MHz,  $\text{DMSO-}d_6$ ) spectra of compound 3h

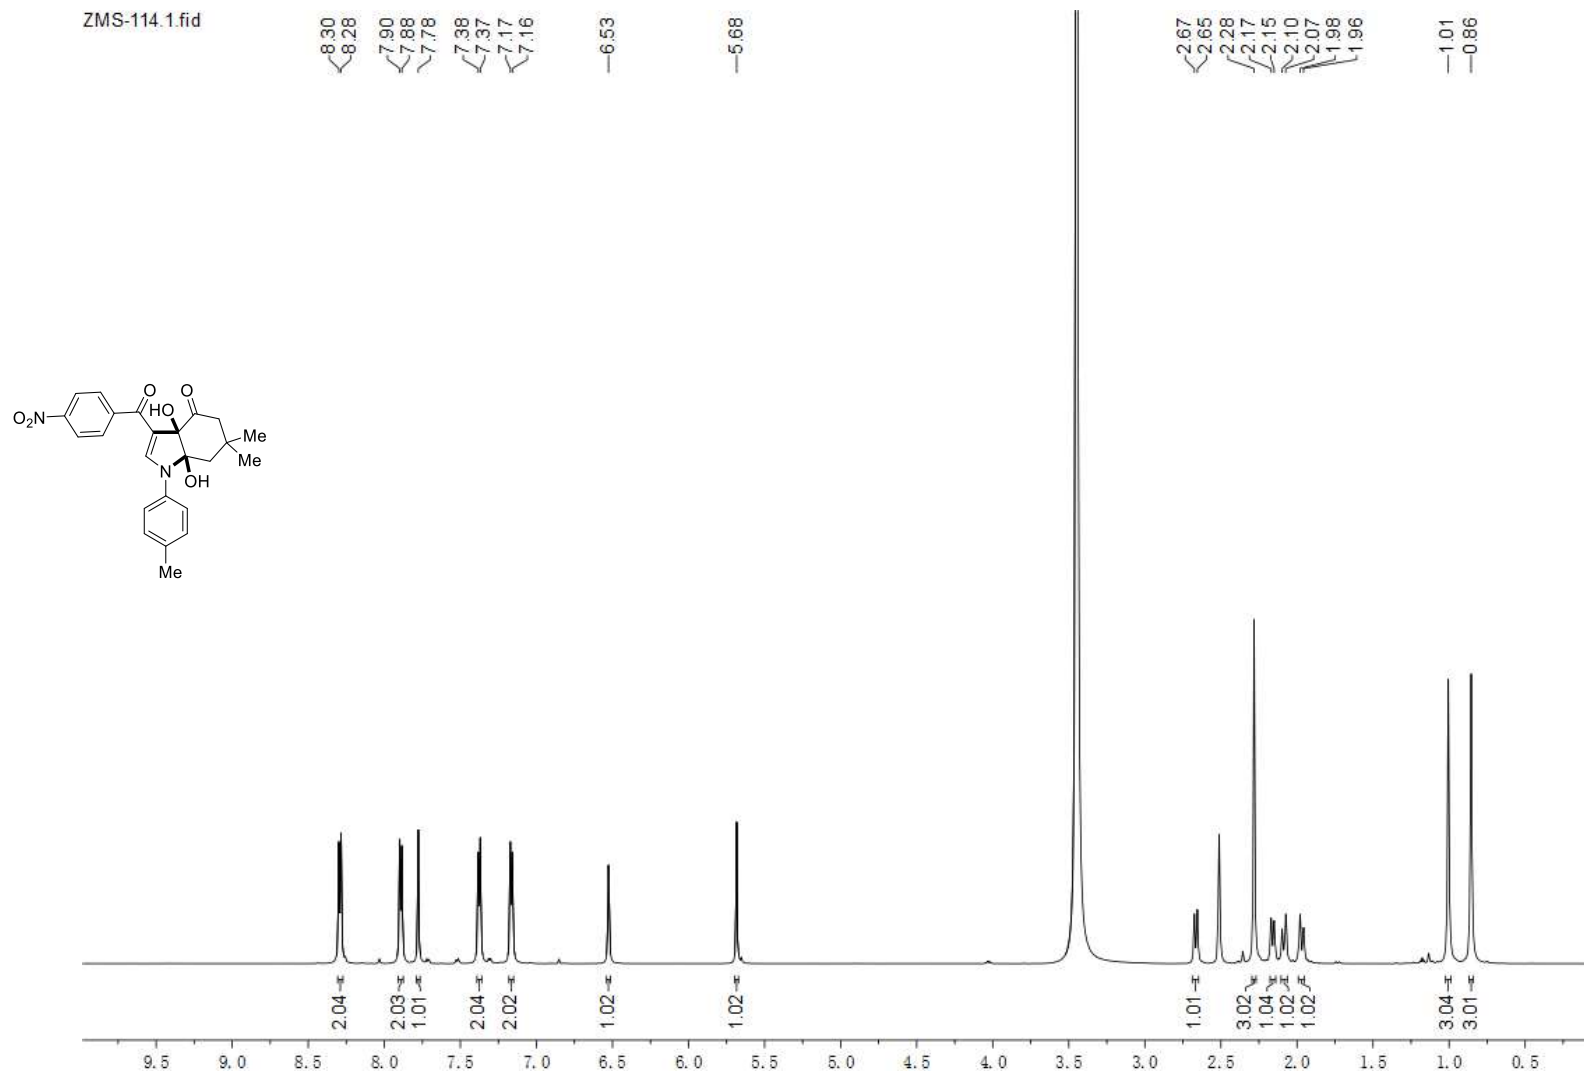

**Figure S18.**  $^1\text{H}$  NMR (600 MHz,  $\text{DMSO-}d_6$ ) spectra of compound **3i**

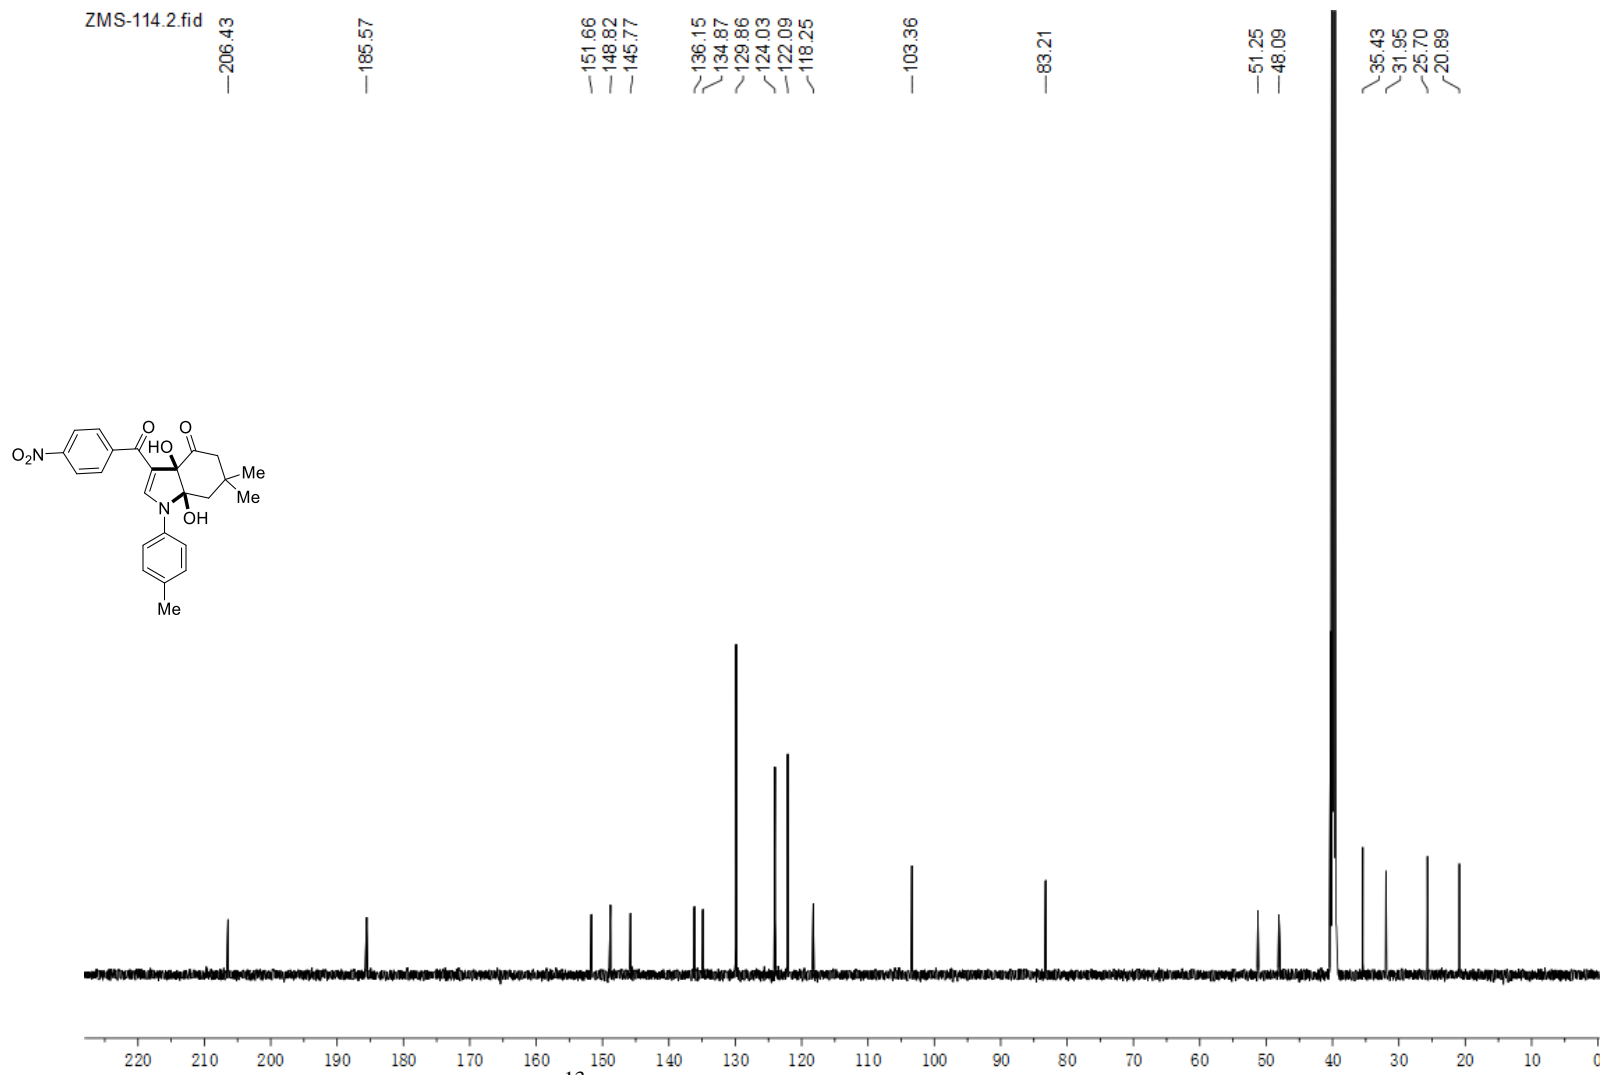

**Figure S19.**  $^{13}\text{C}$  NMR (150 MHz,  $\text{DMSO-}d_6$ ) spectra of compound **3i**

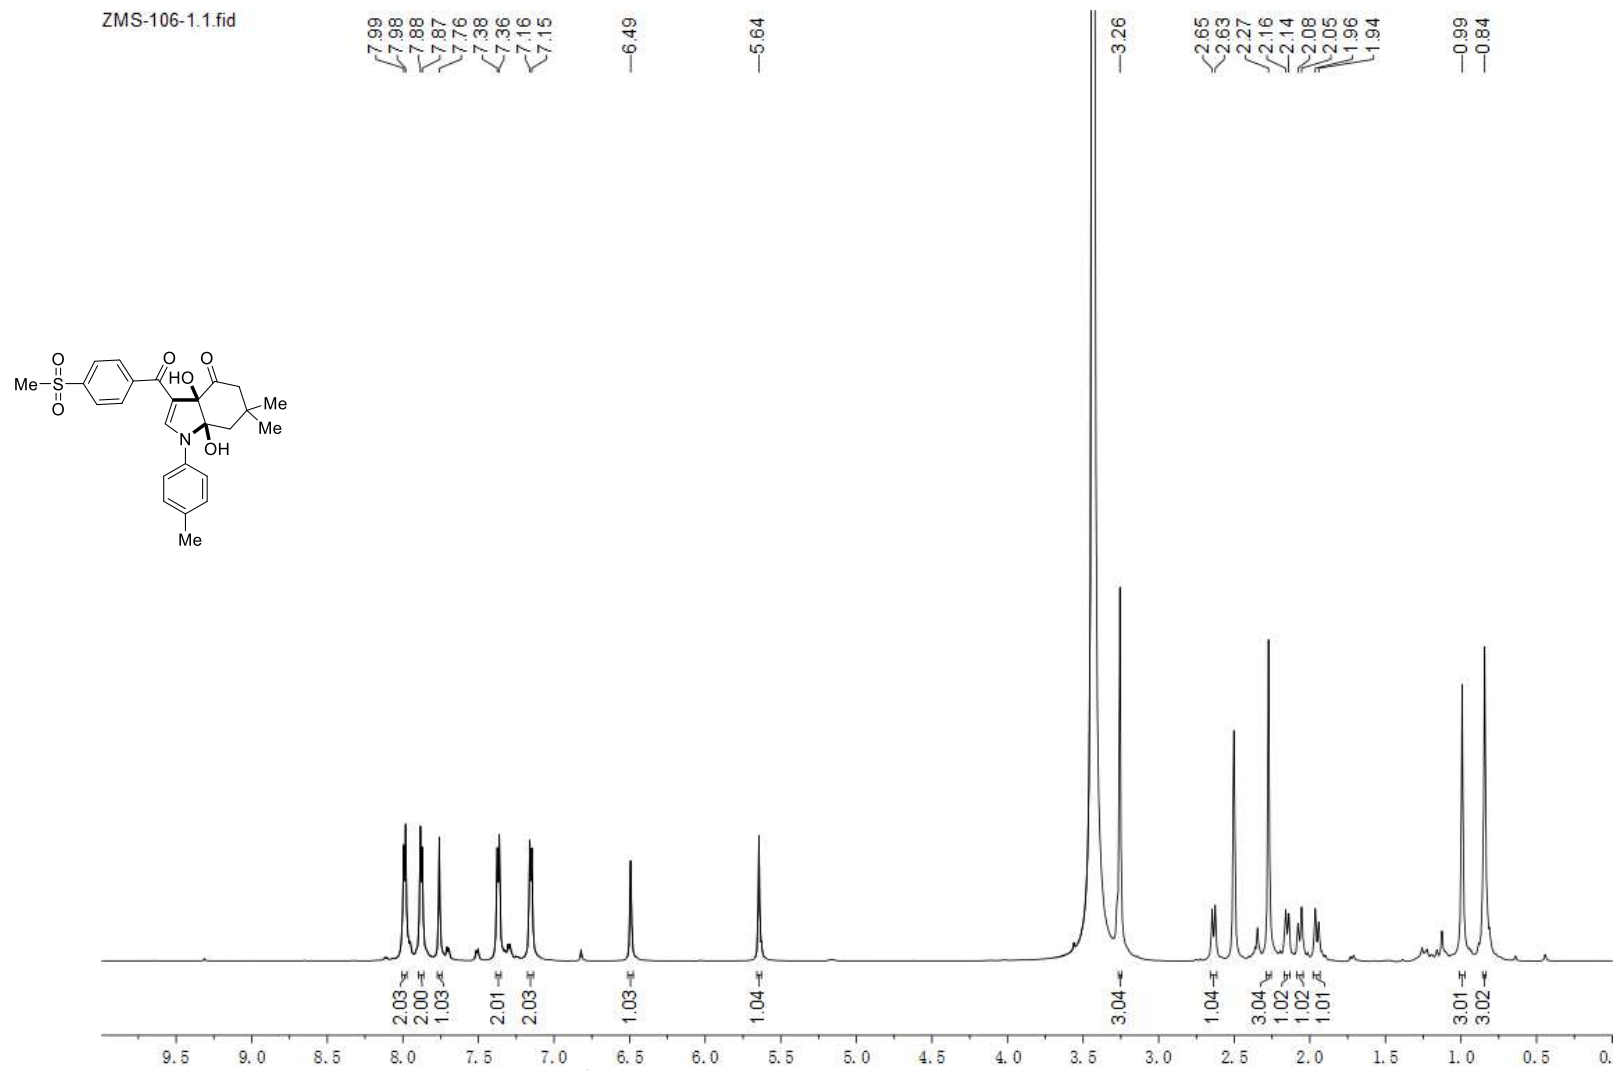

**Figure S20.**  $^1\text{H}$  NMR (600 MHz,  $\text{DMSO-}d_6$ ) spectra of compound **3j**

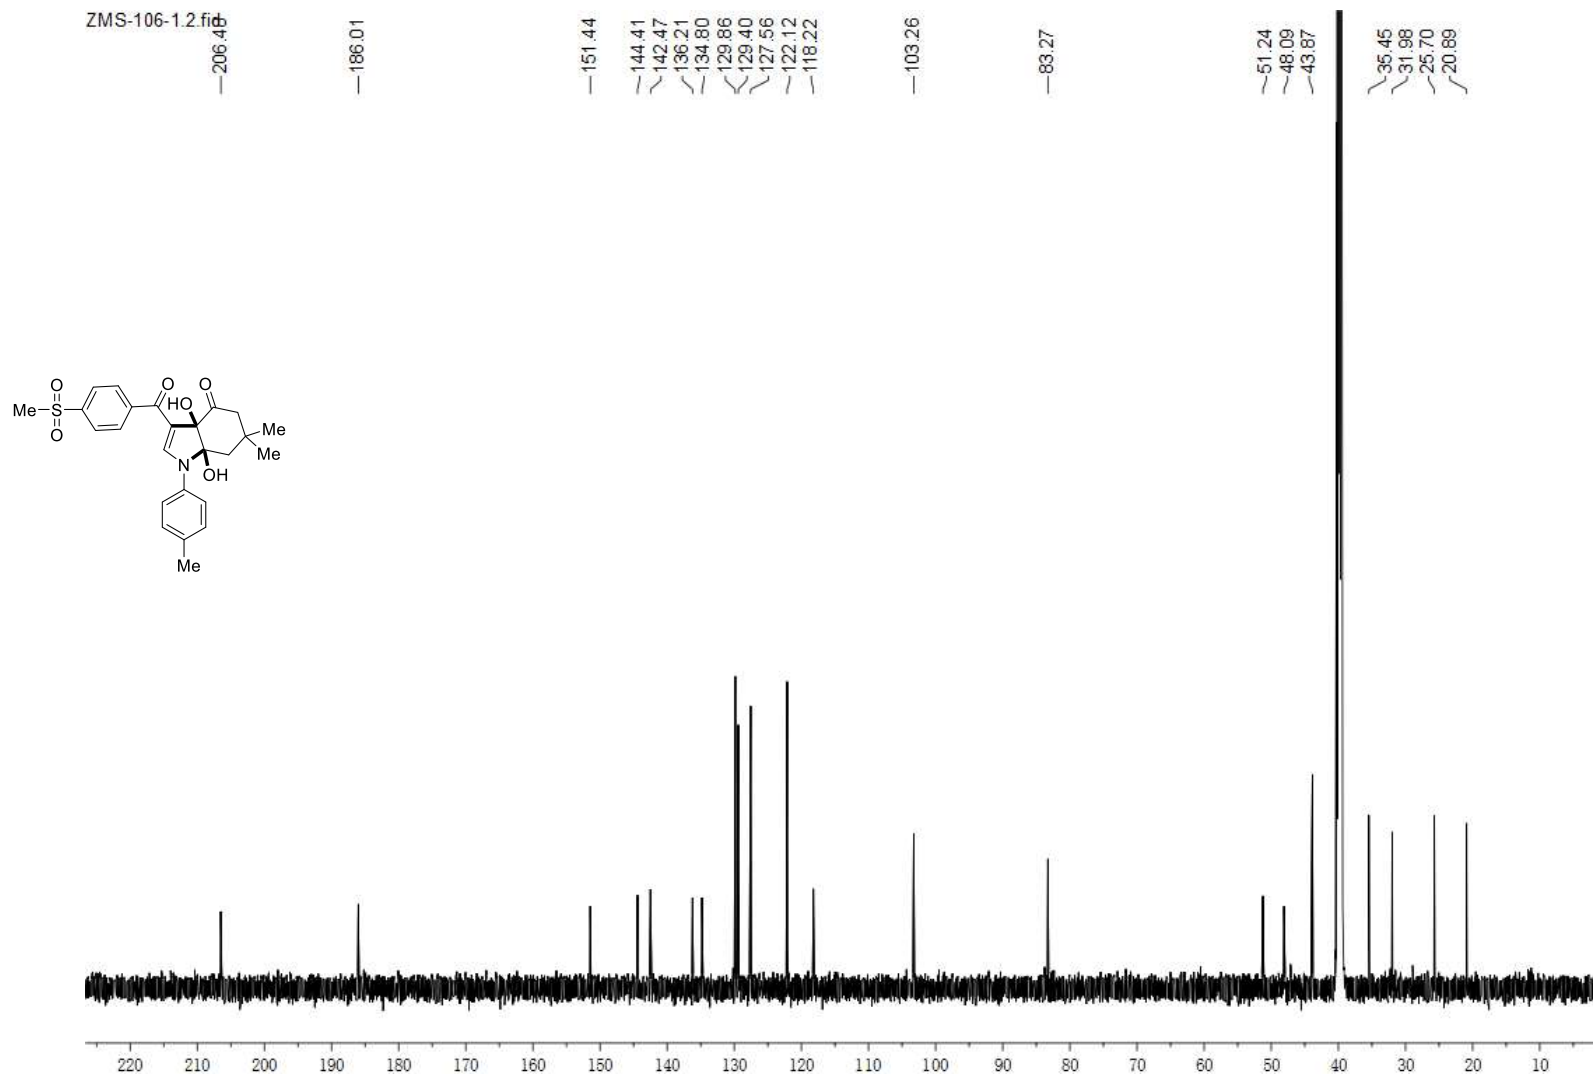

**Figure S21.**  $^{13}\text{C}$  NMR (150 MHz,  $\text{DMSO-}d_6$ ) spectra of compound **3j**

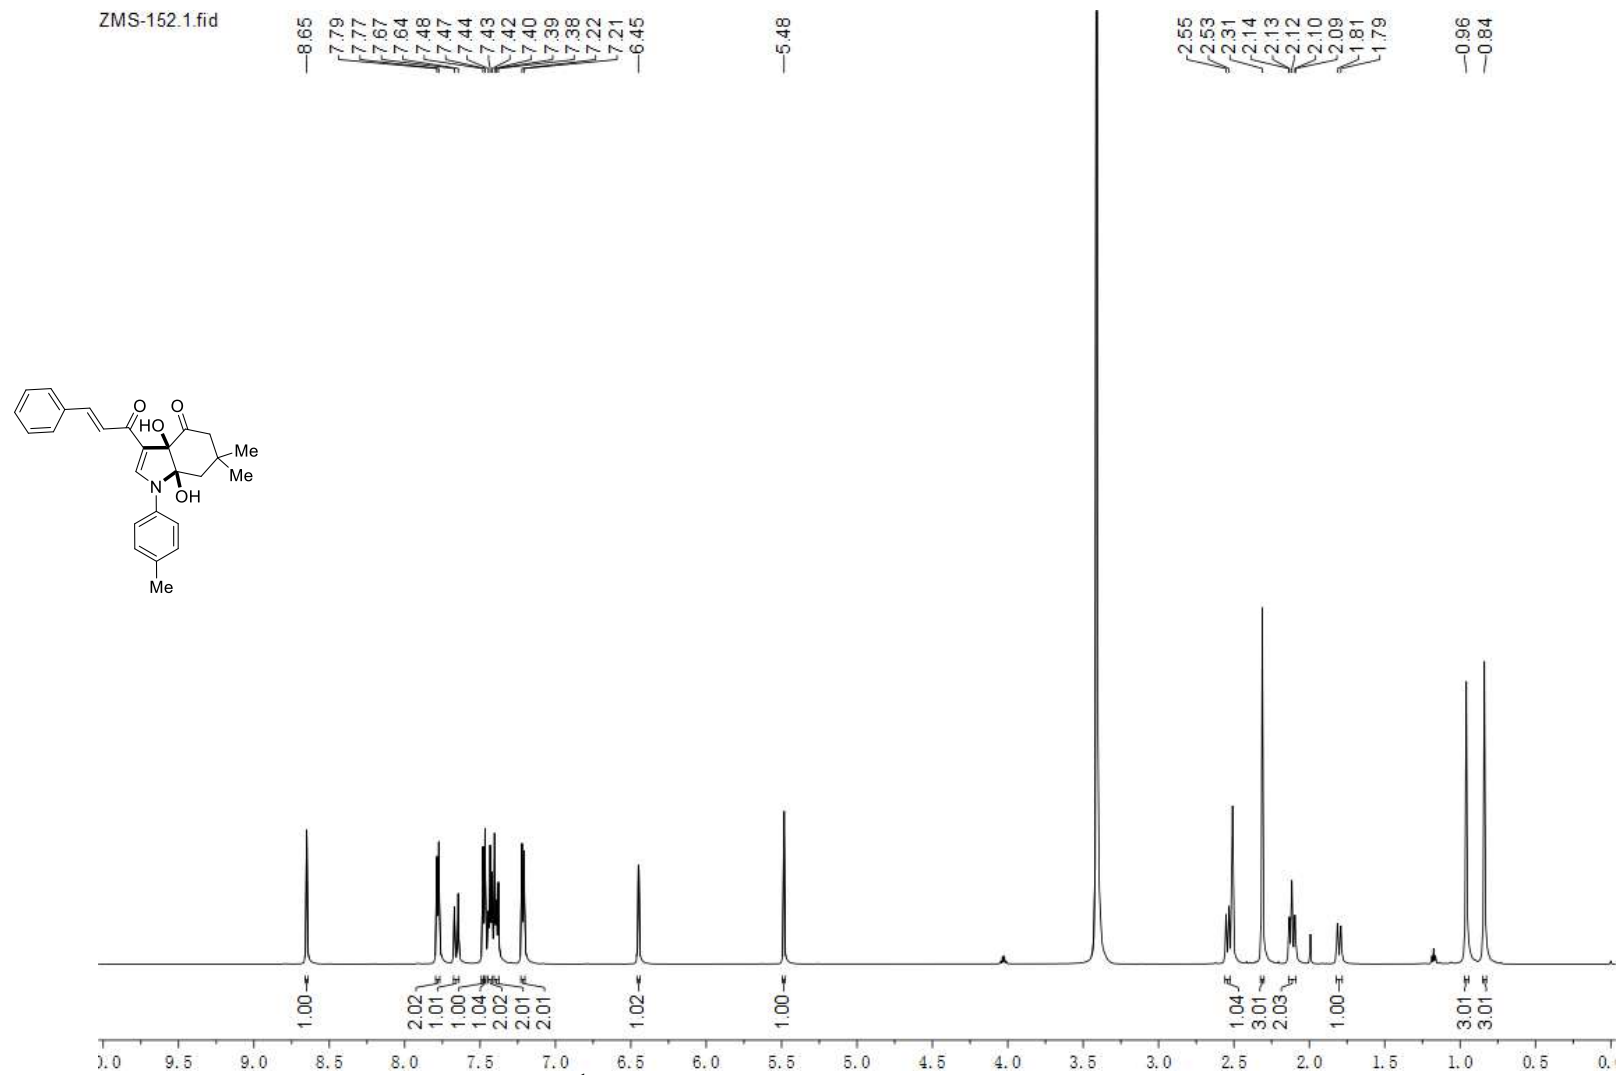

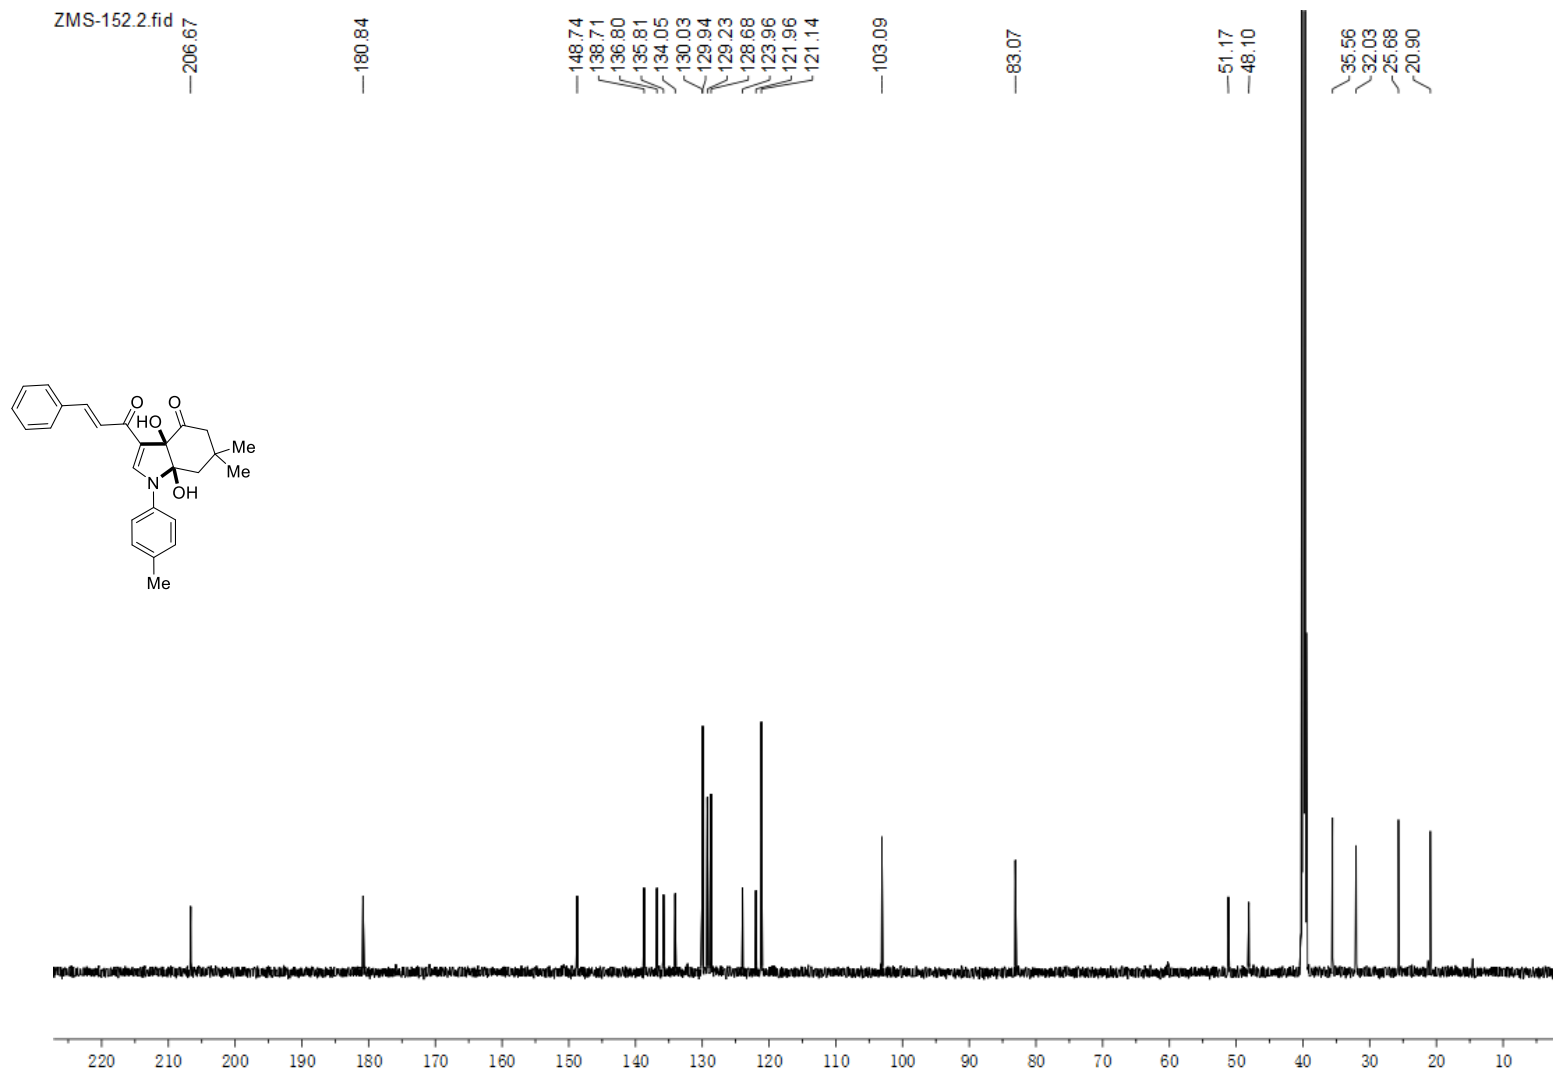

**Figure S23.**  $^{13}\text{C}$  NMR (150 MHz,  $\text{DMSO-}d_6$ ) spectra of compound **3k**



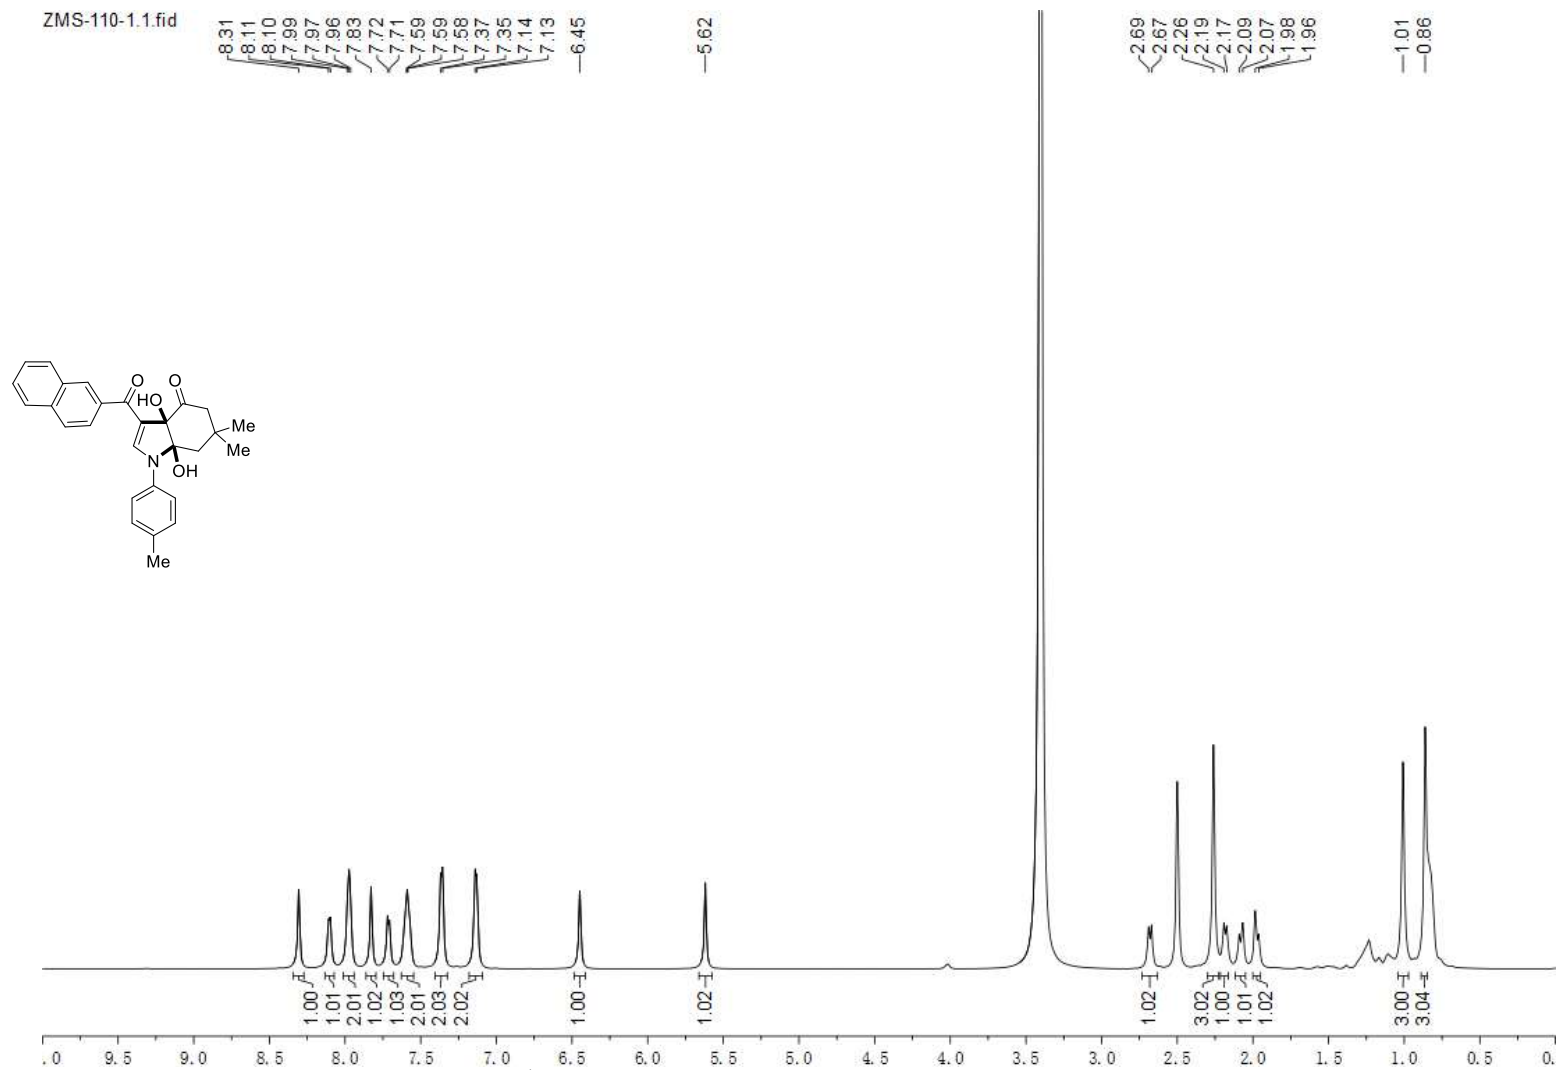

**Figure S24.**  $^1\text{H}$  NMR (600 MHz,  $\text{DMSO-}d_6$ ) spectra of compound **3l**

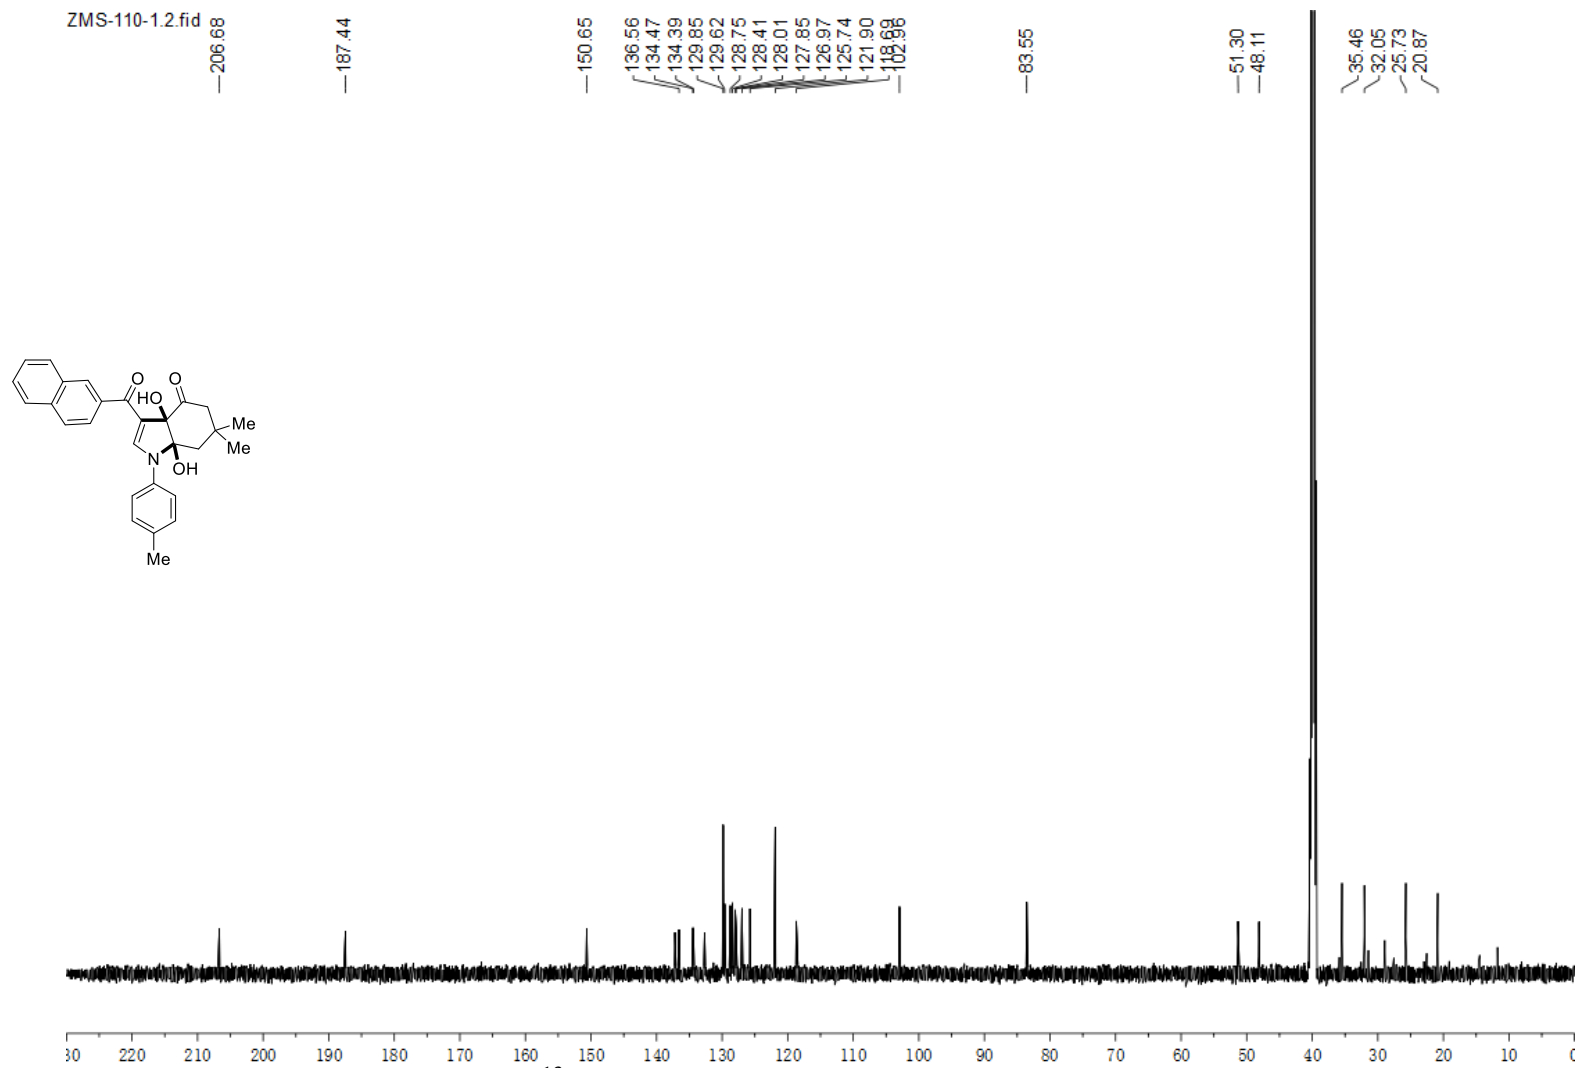

Figure S25.  $^{13}\text{C}$  NMR (150 MHz,  $\text{DMSO-}d_6$ ) spectra of compound **31**

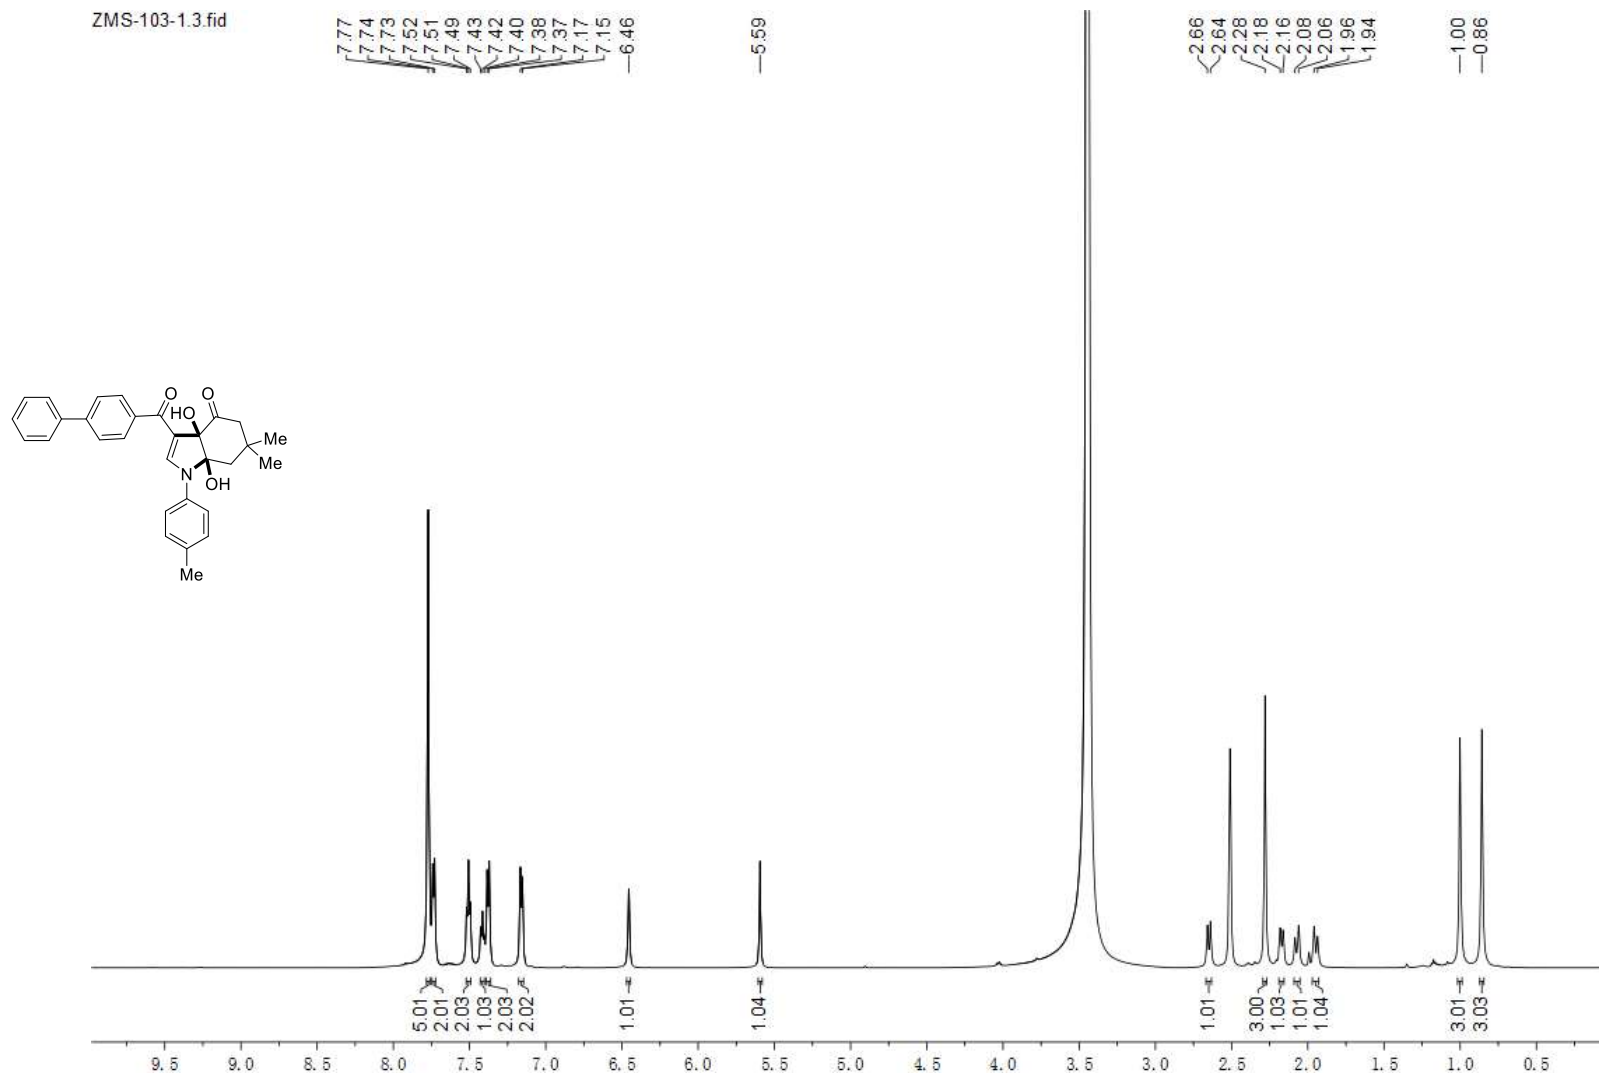

**Figure S26.**  $^1\text{H NMR}$  (600 MHz,  $\text{DMSO-}d_6$ ) spectra of compound **3m**

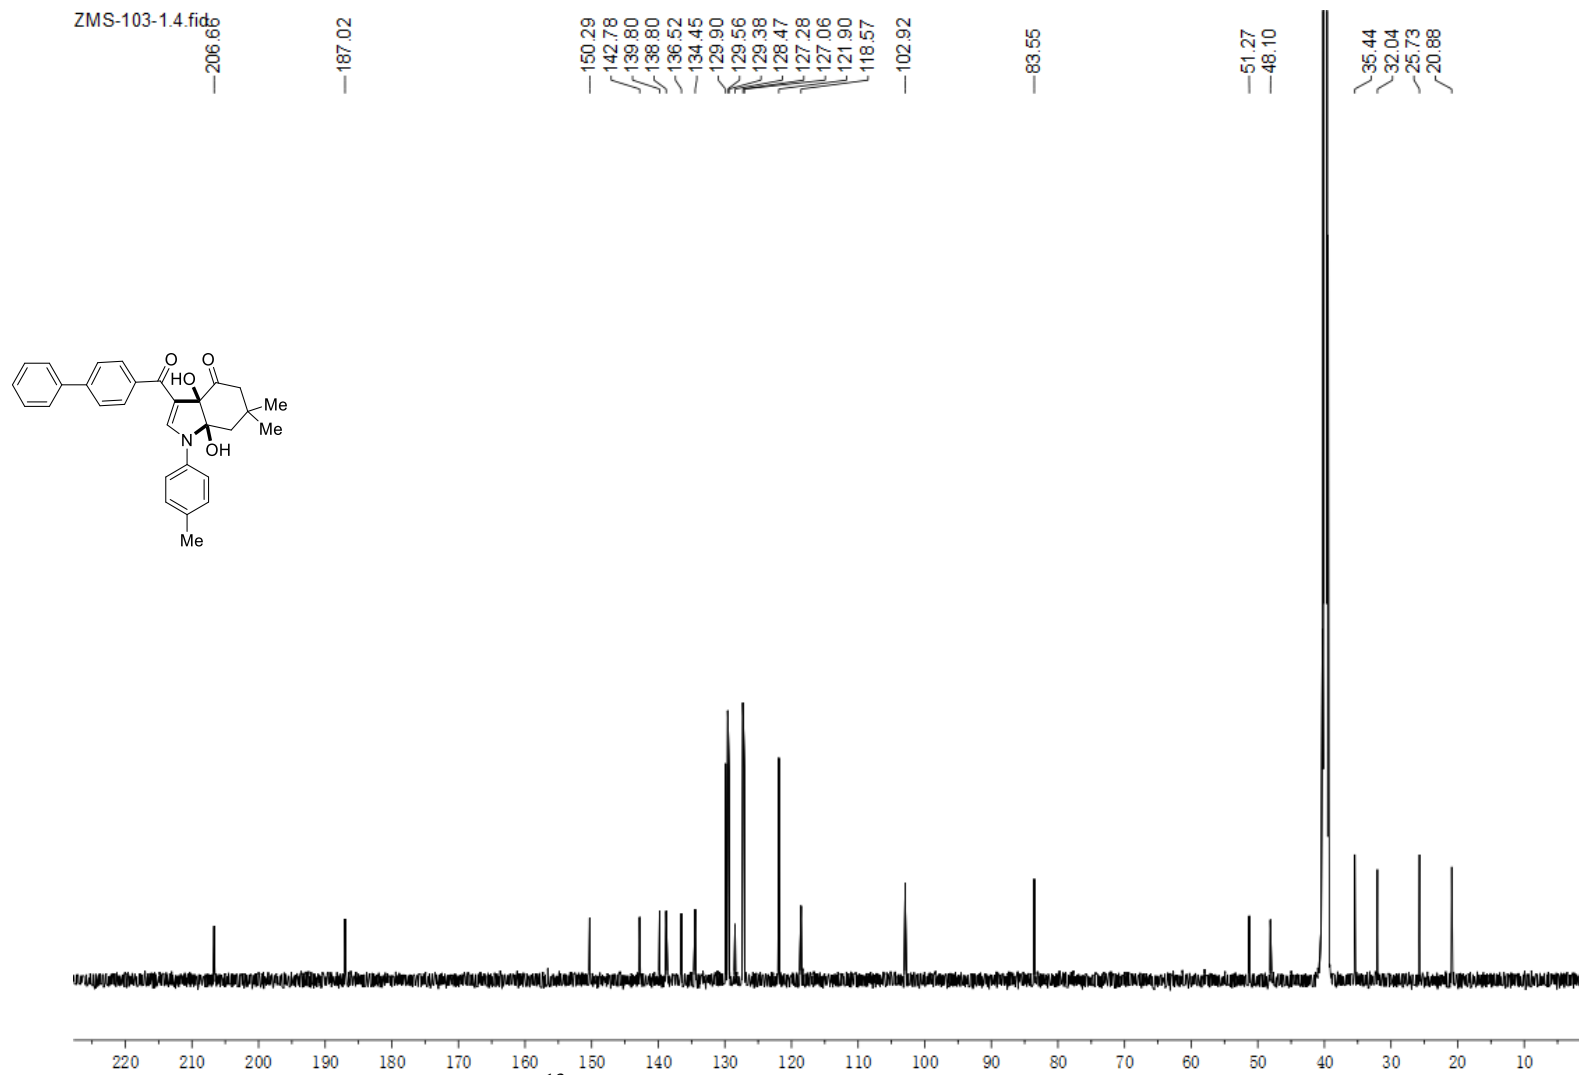

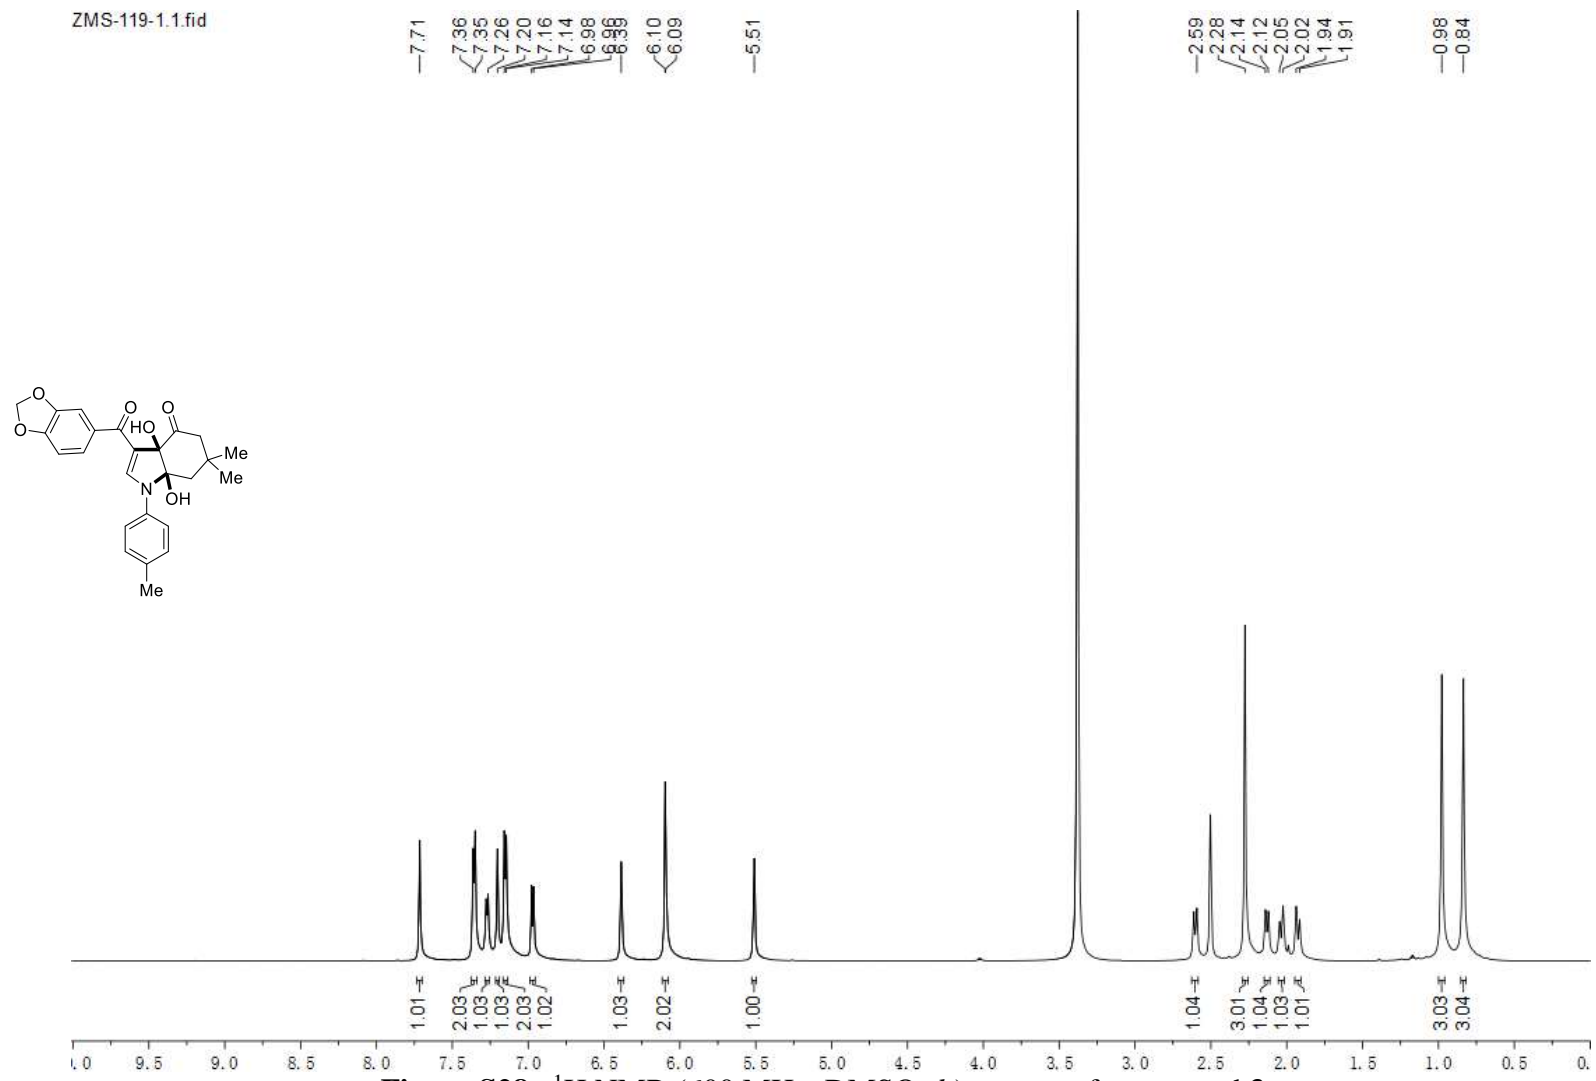

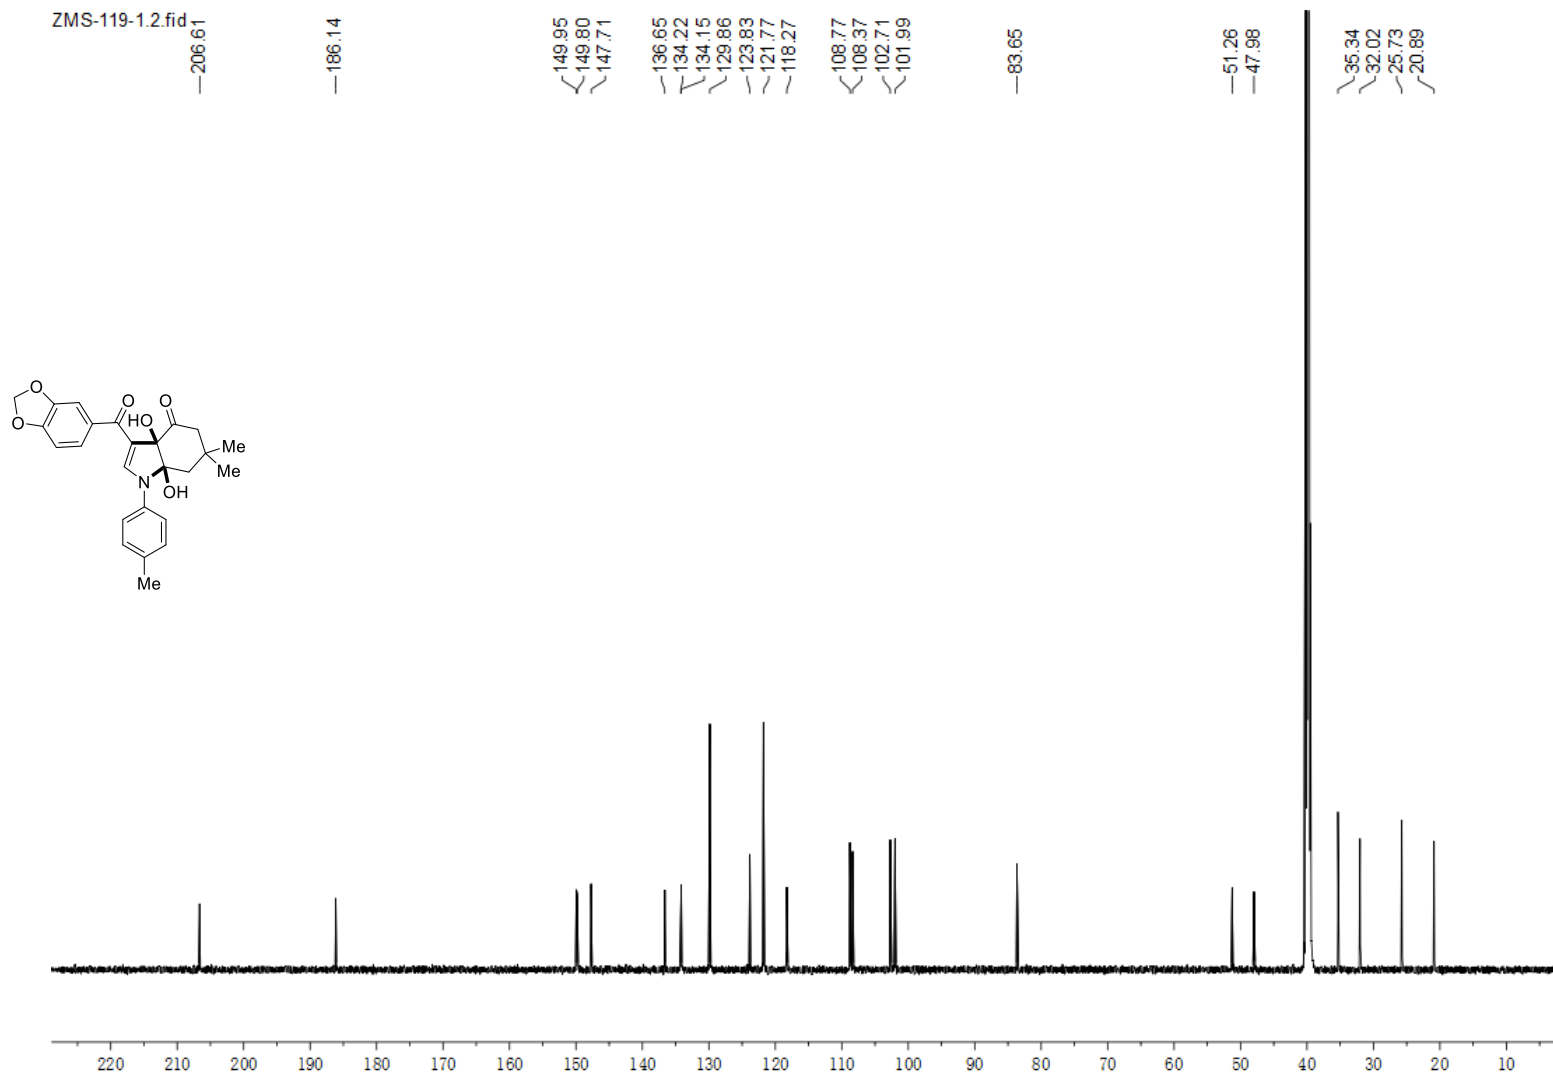

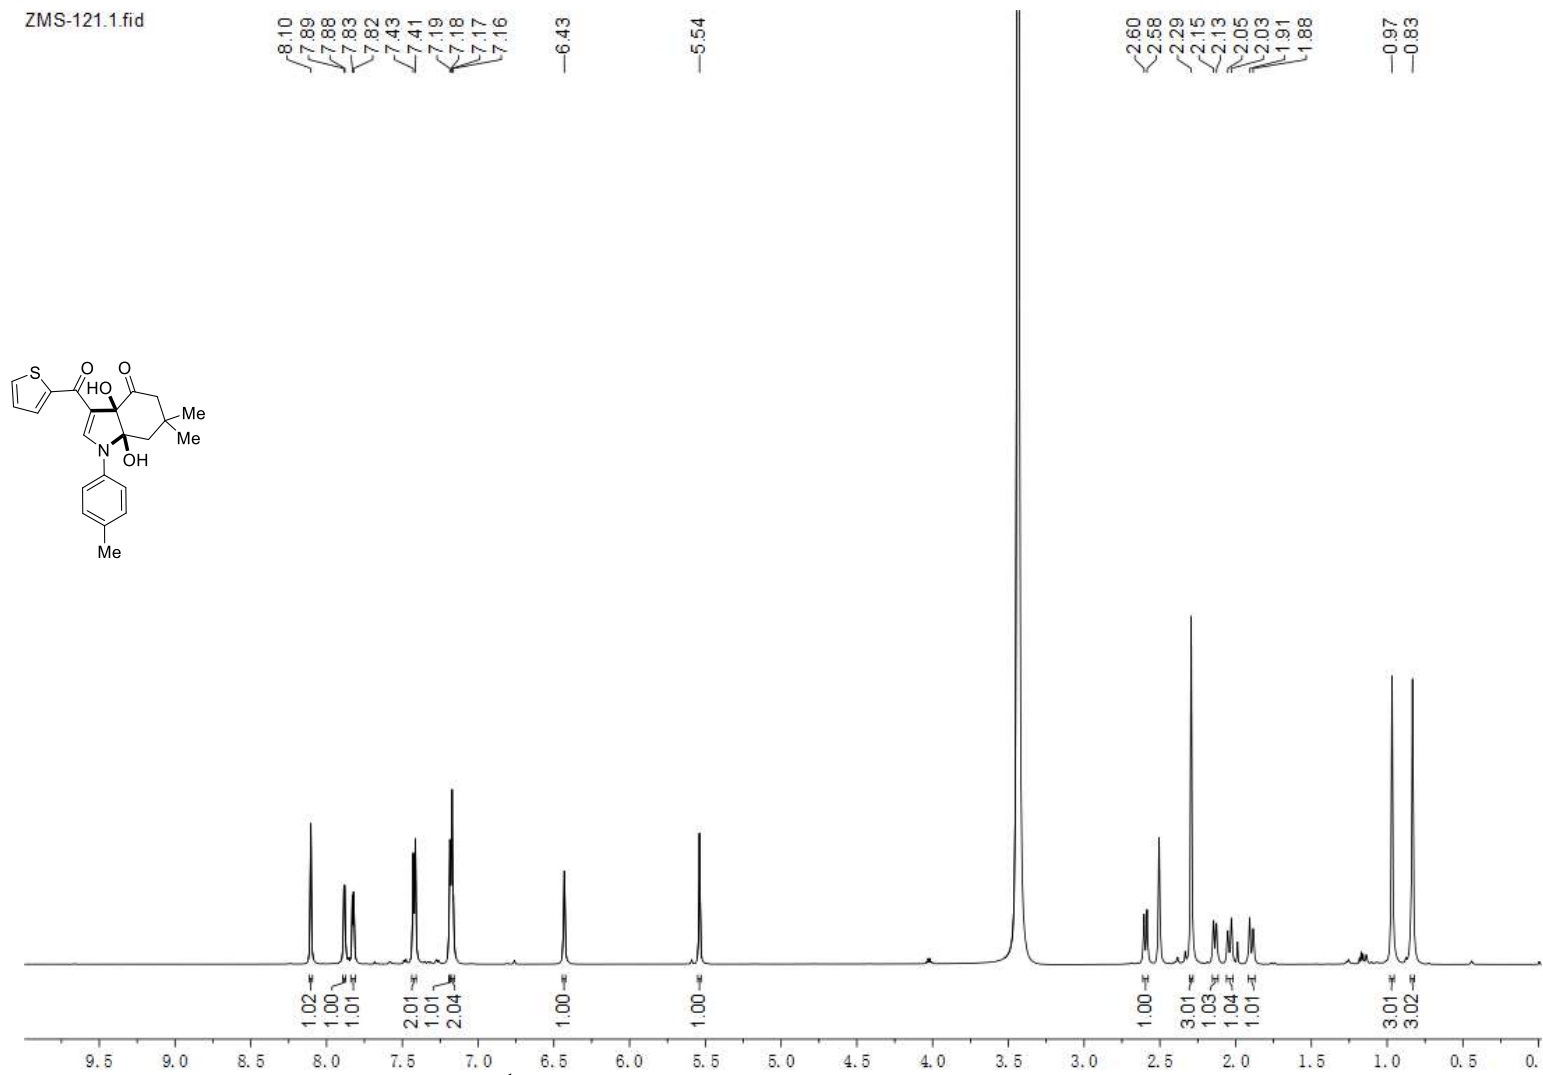

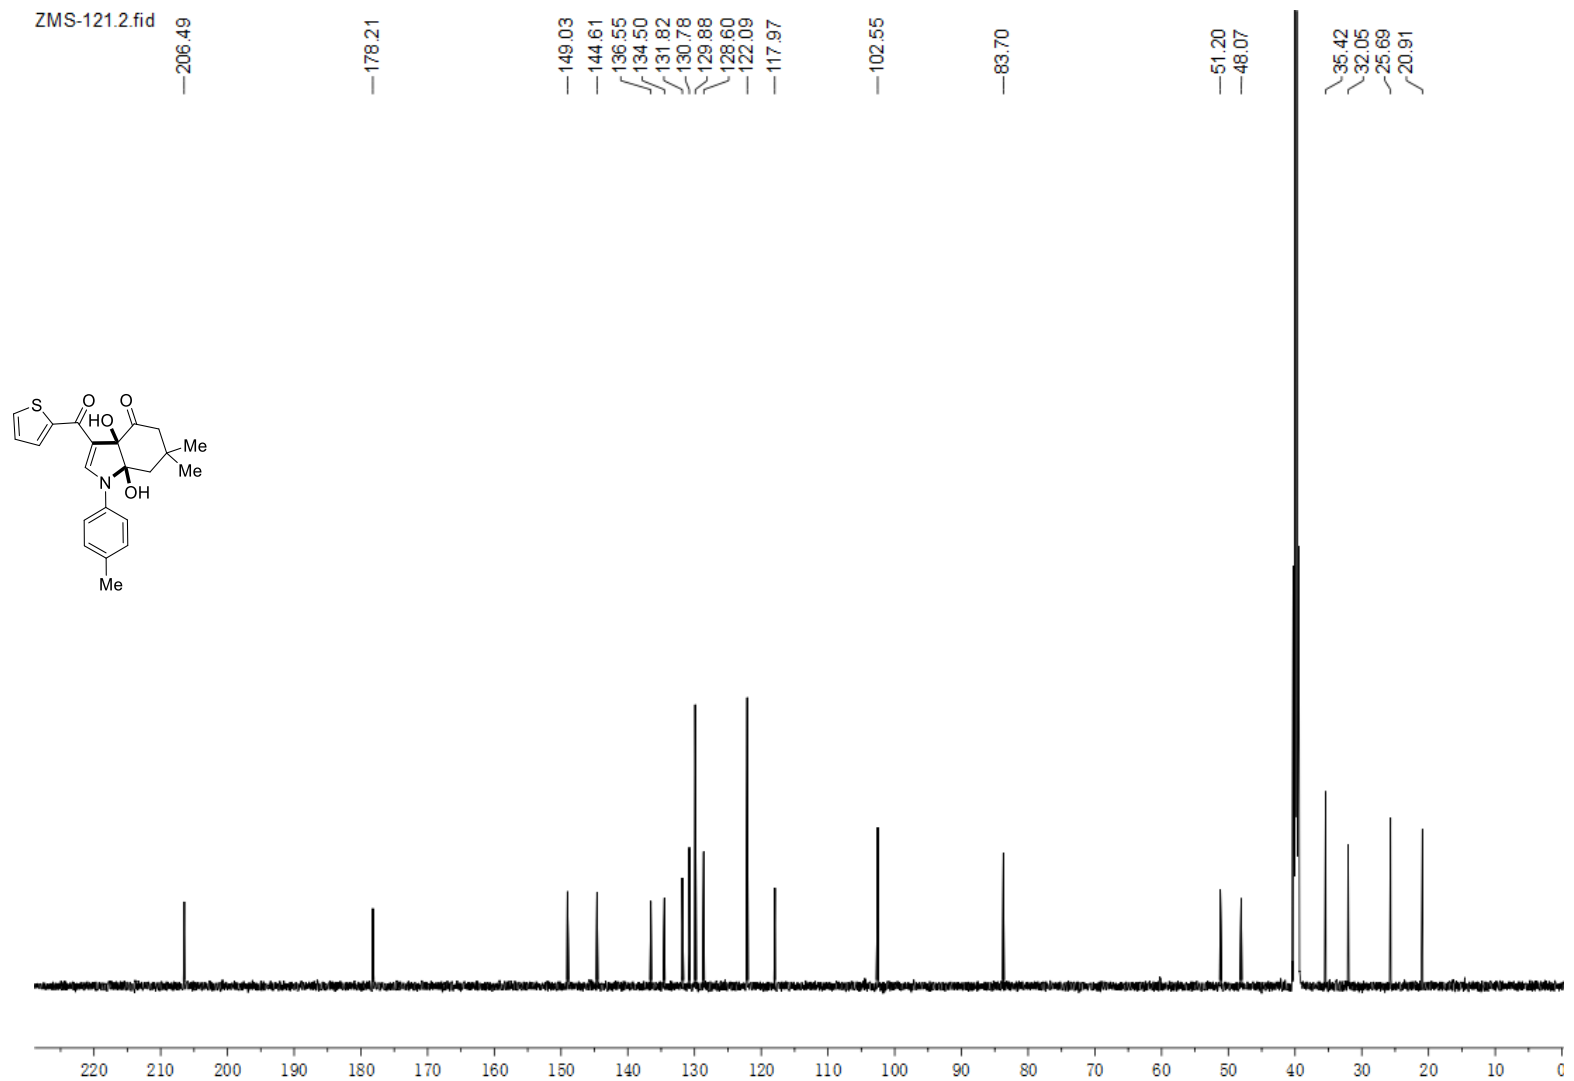

Figure S31. <sup>13</sup>C NMR (150 MHz, DMSO-*d*<sub>6</sub>) spectra of compound 3o



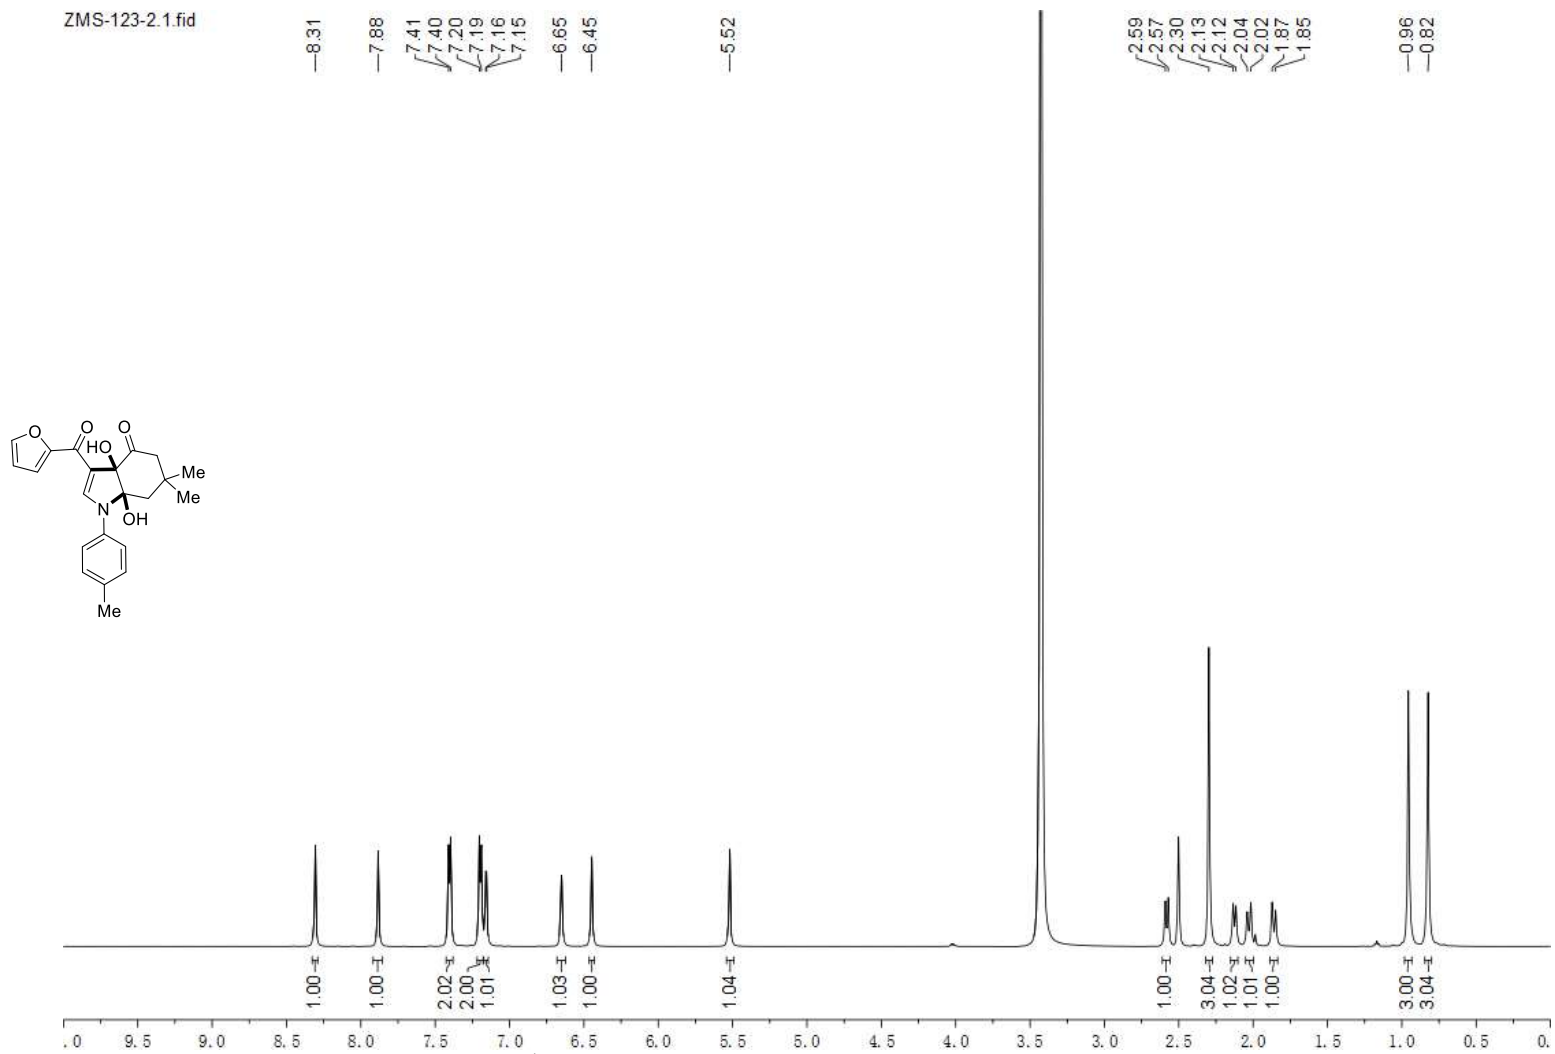

**Figure S32.**  $^1\text{H}$  NMR (600 MHz,  $\text{DMSO-}d_6$ ) spectra of compound **3p**

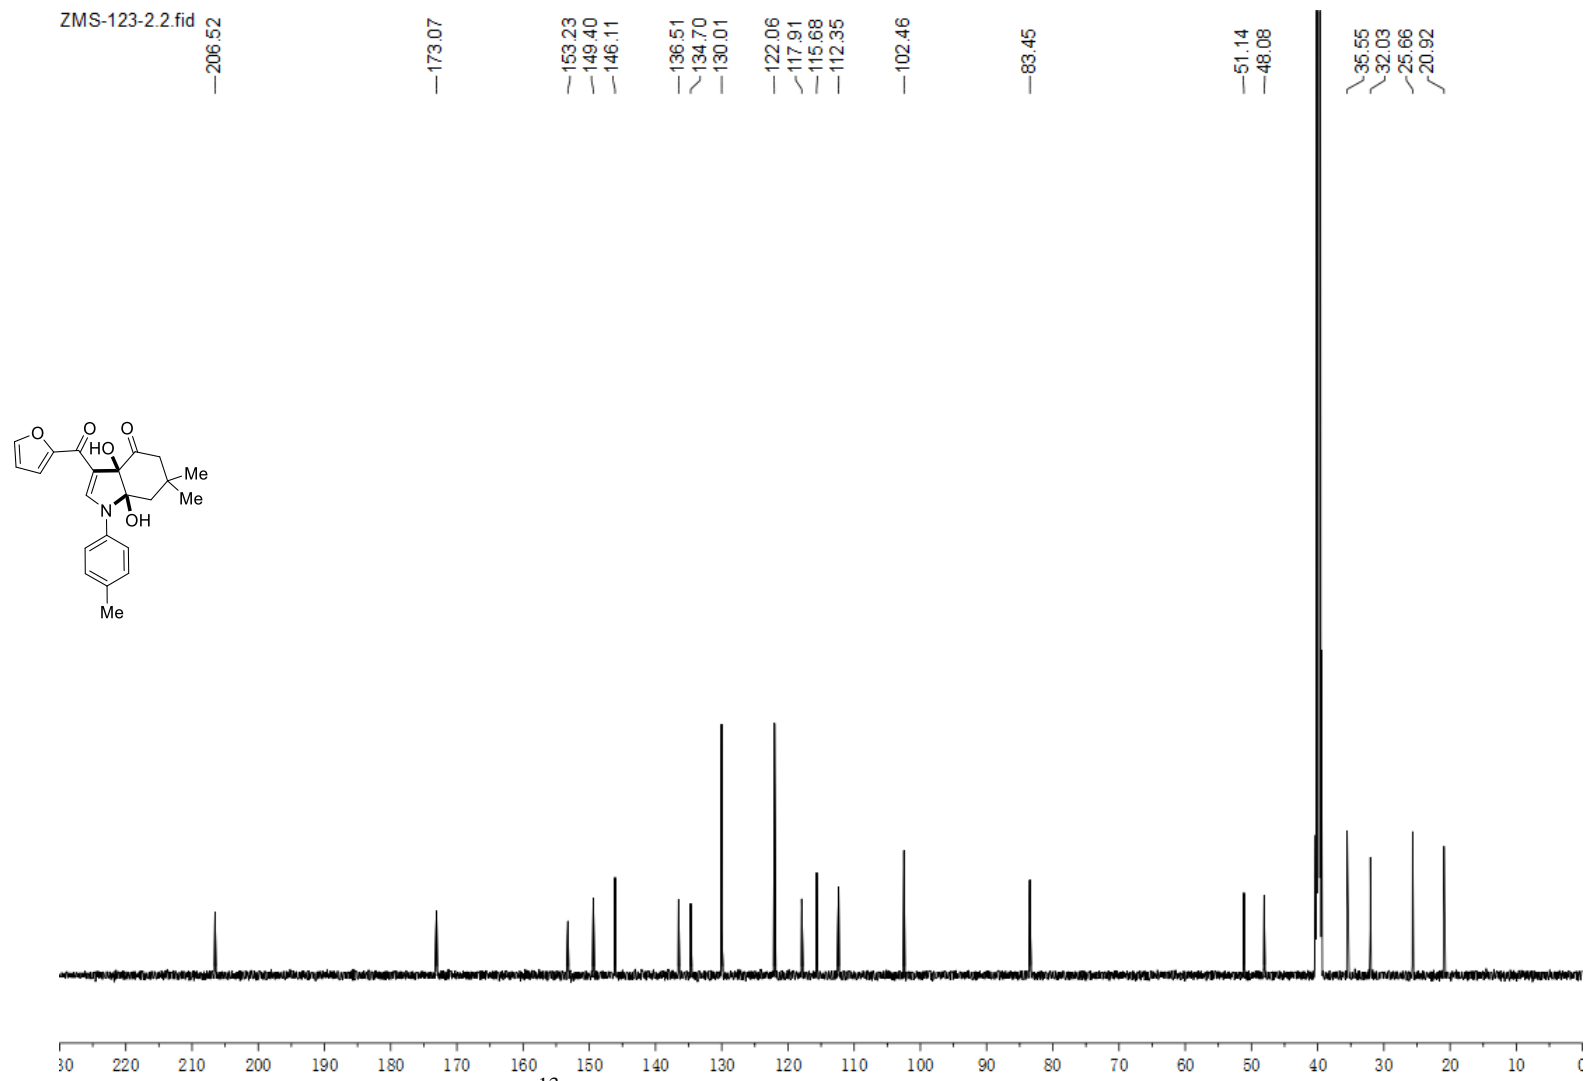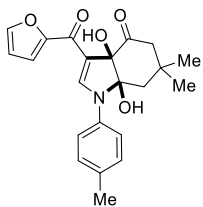

Figure S33. <sup>13</sup>C NMR (150 MHz, DMSO-*d*<sub>6</sub>) spectra of compound 3p

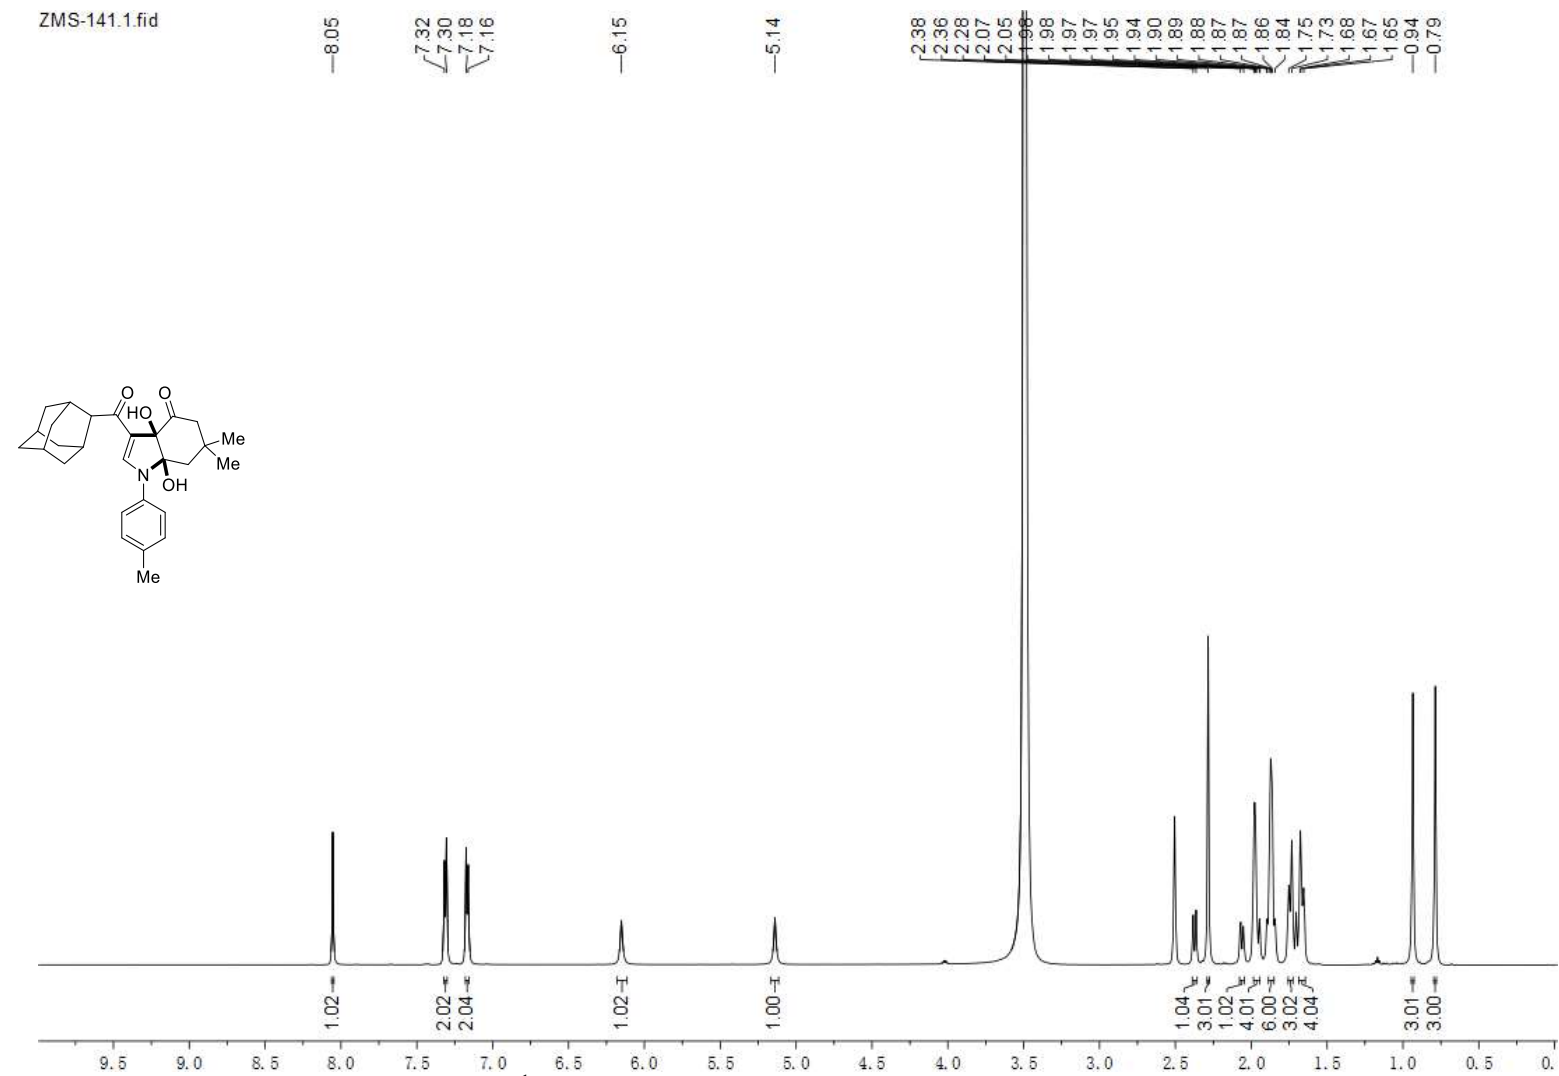

**Figure S34.**  $^1\text{H NMR}$  (600 MHz,  $\text{DMSO-}d_6$ ) spectra of compound **3q**

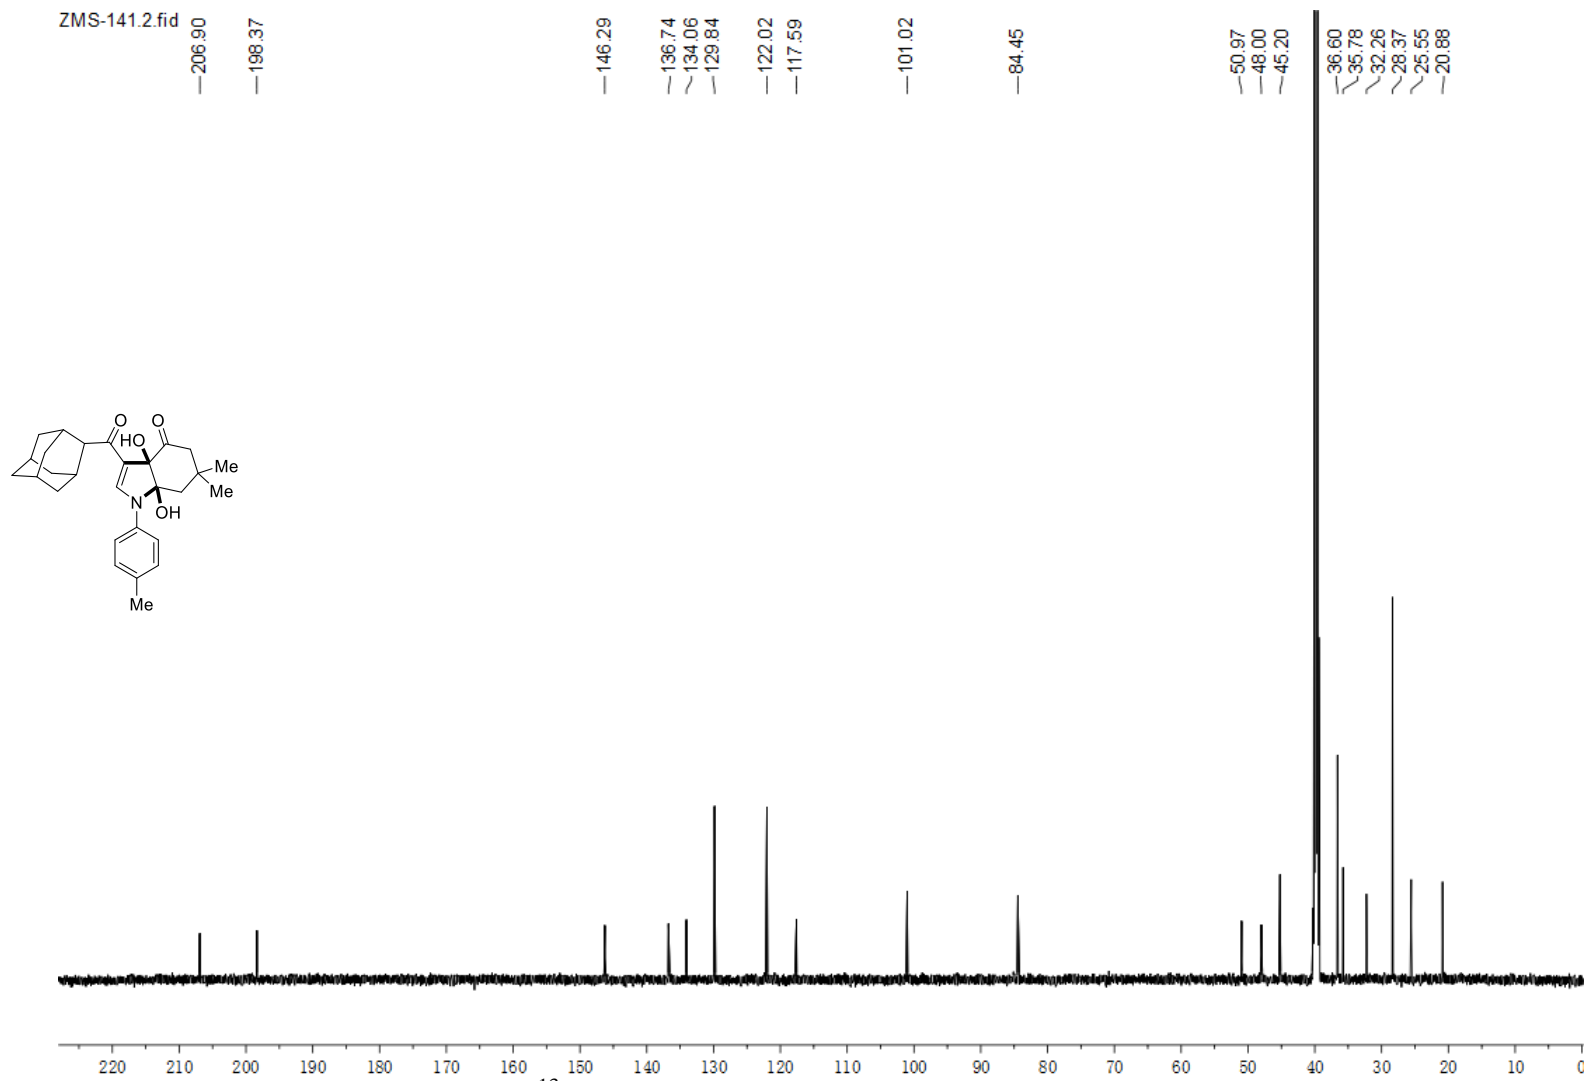

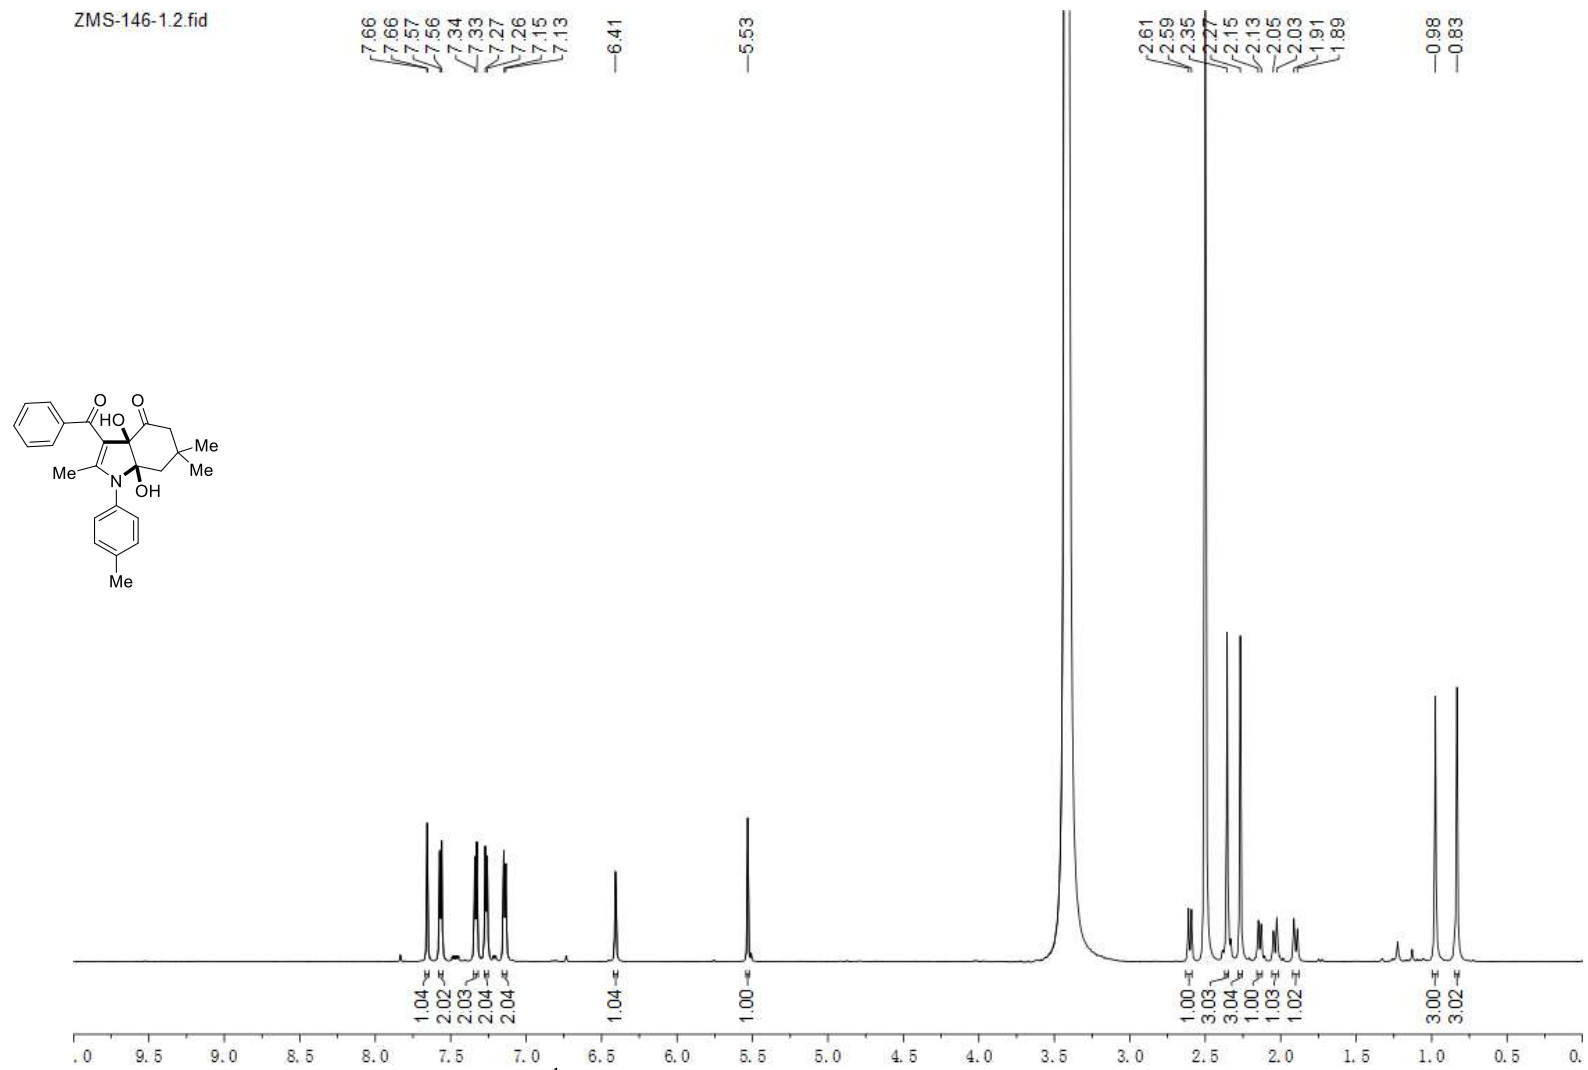

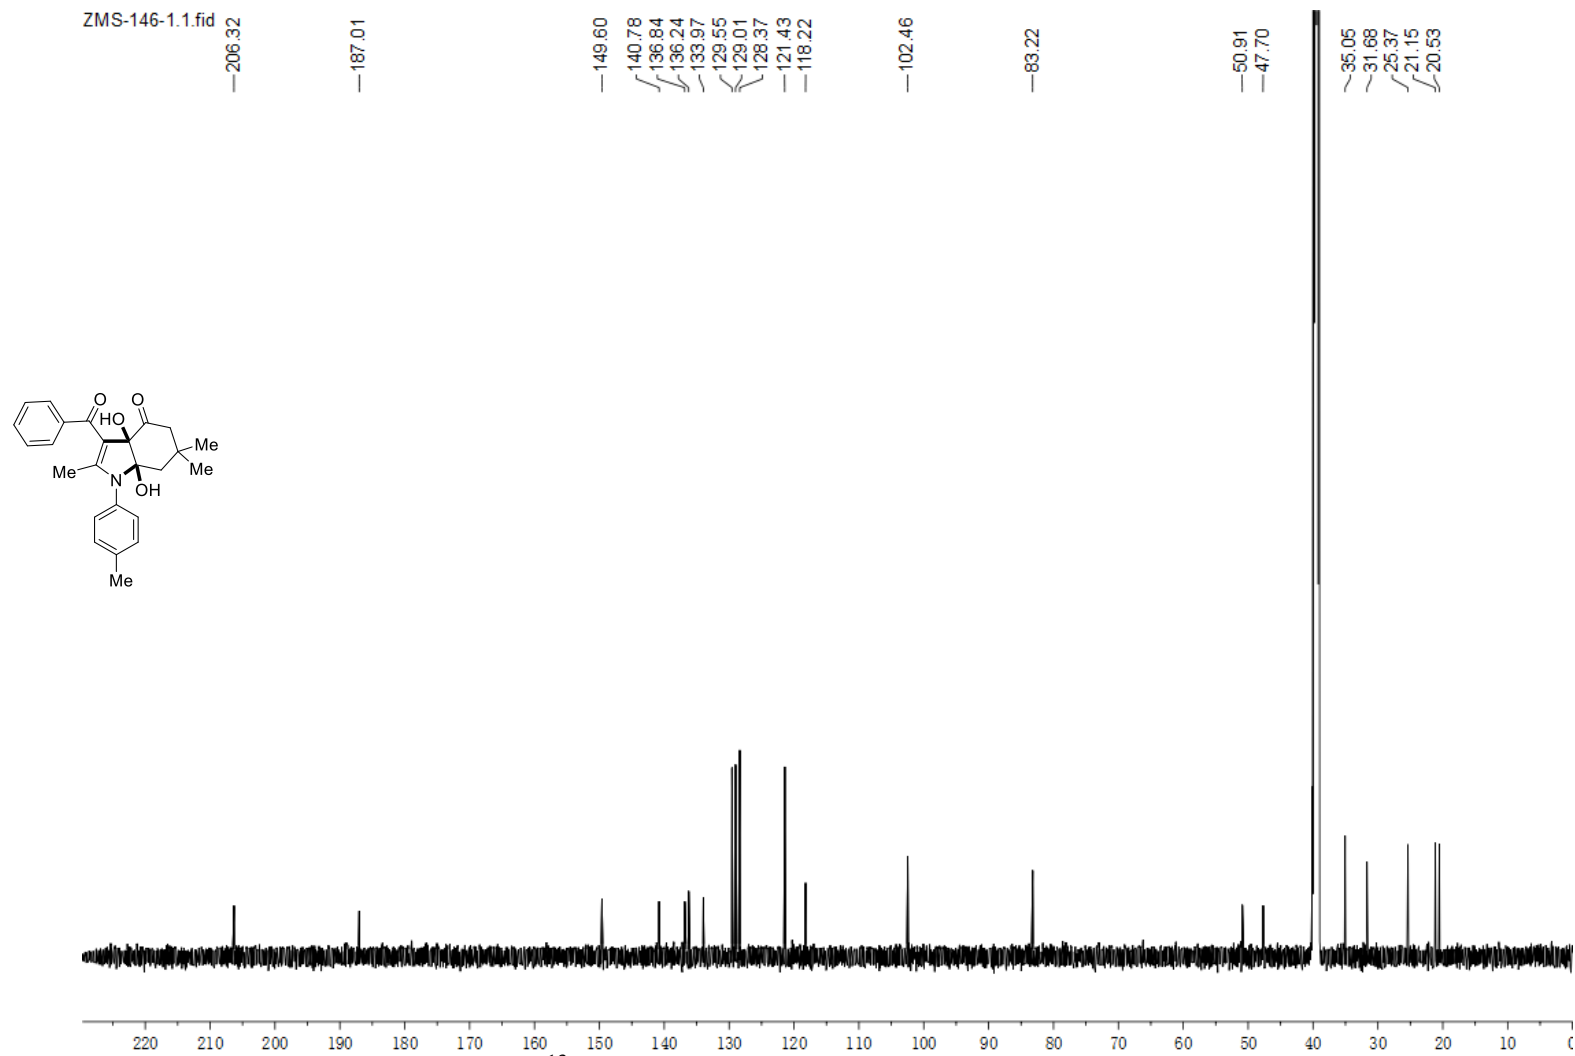

Figure S37.  $^{13}\text{C}$  NMR (150 MHz,  $\text{DMSO-}d_6$ ) spectra of compound **3r**

ZMS-148.1.fid

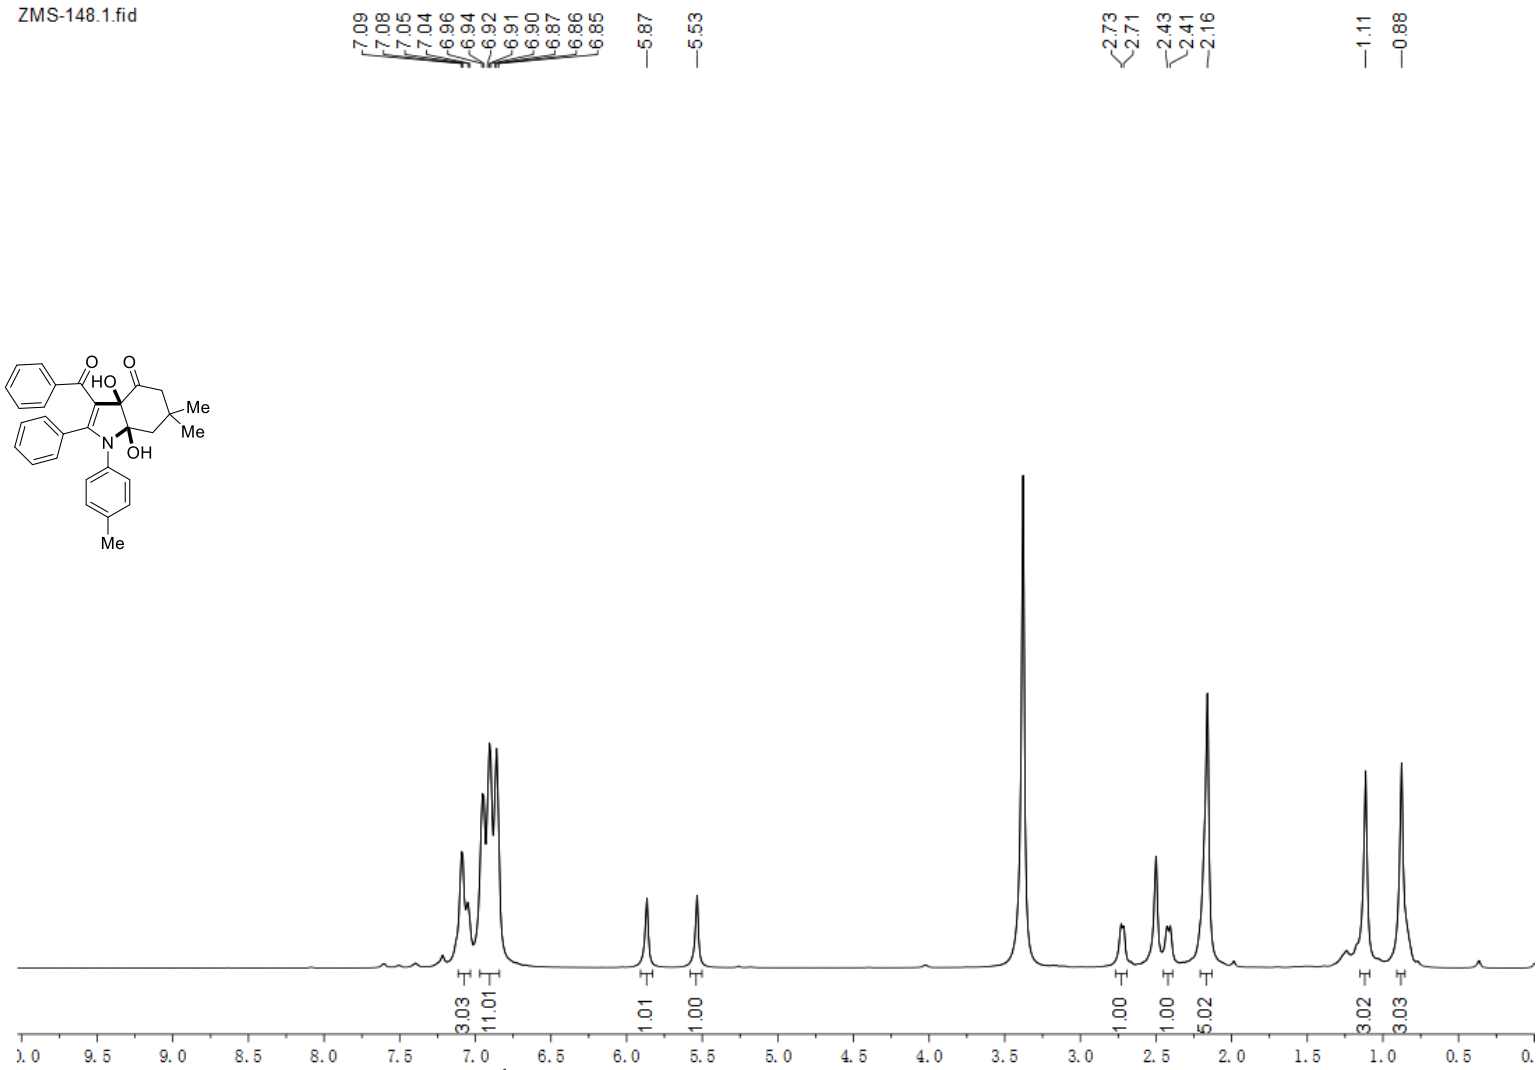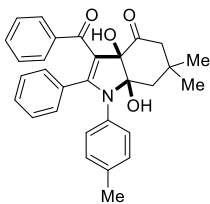

Figure S38.  $^1\text{H}$  NMR (600 MHz,  $\text{DMSO-}d_6$ ) spectra of compound **3s**

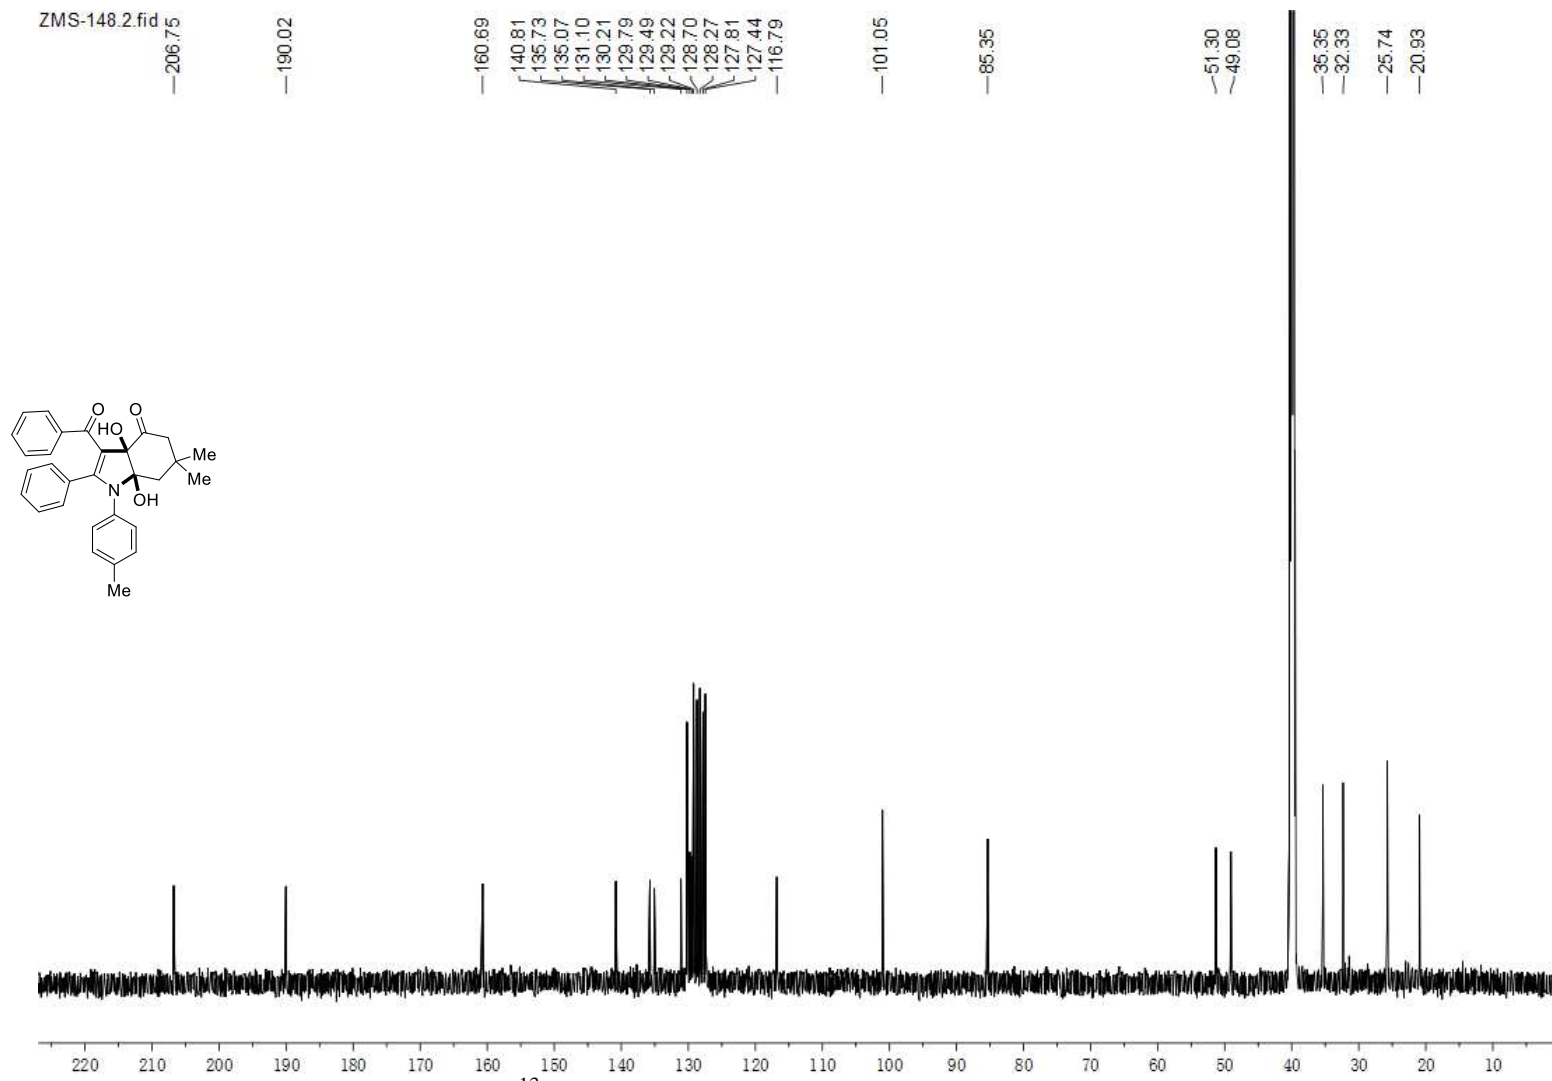

**Figure S39.**  $^{13}\text{C}$  NMR (150 MHz,  $\text{DMSO-}d_6$ ) spectra of compound **3s**



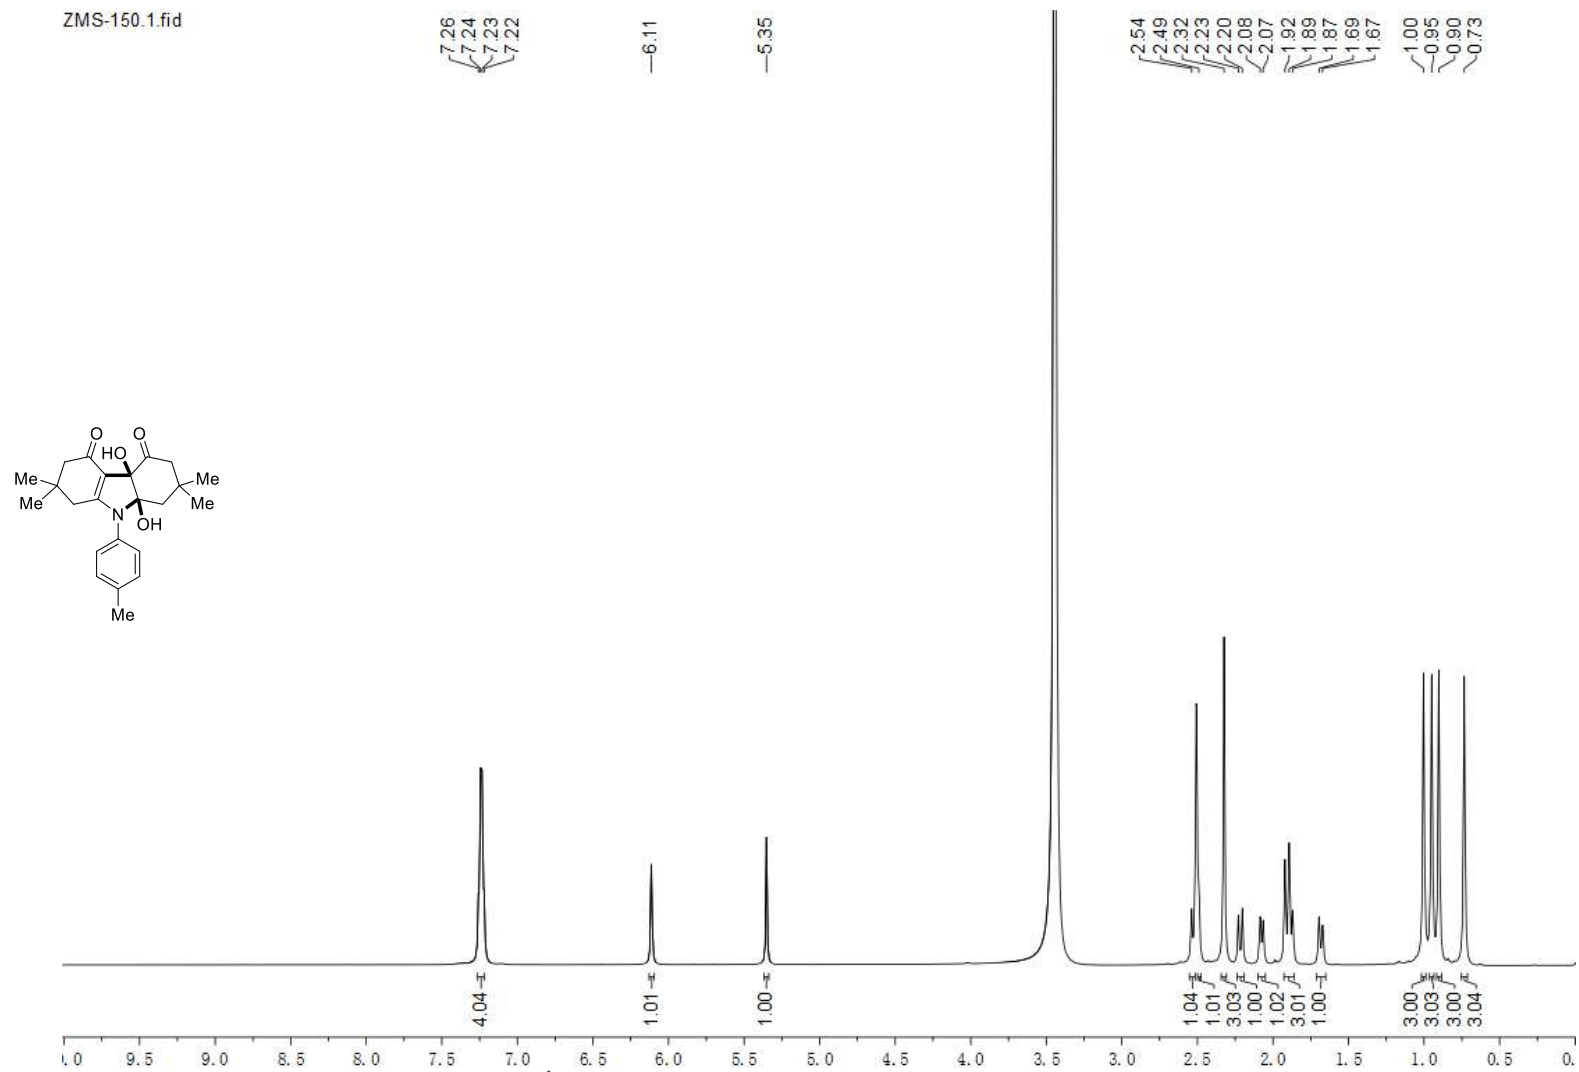

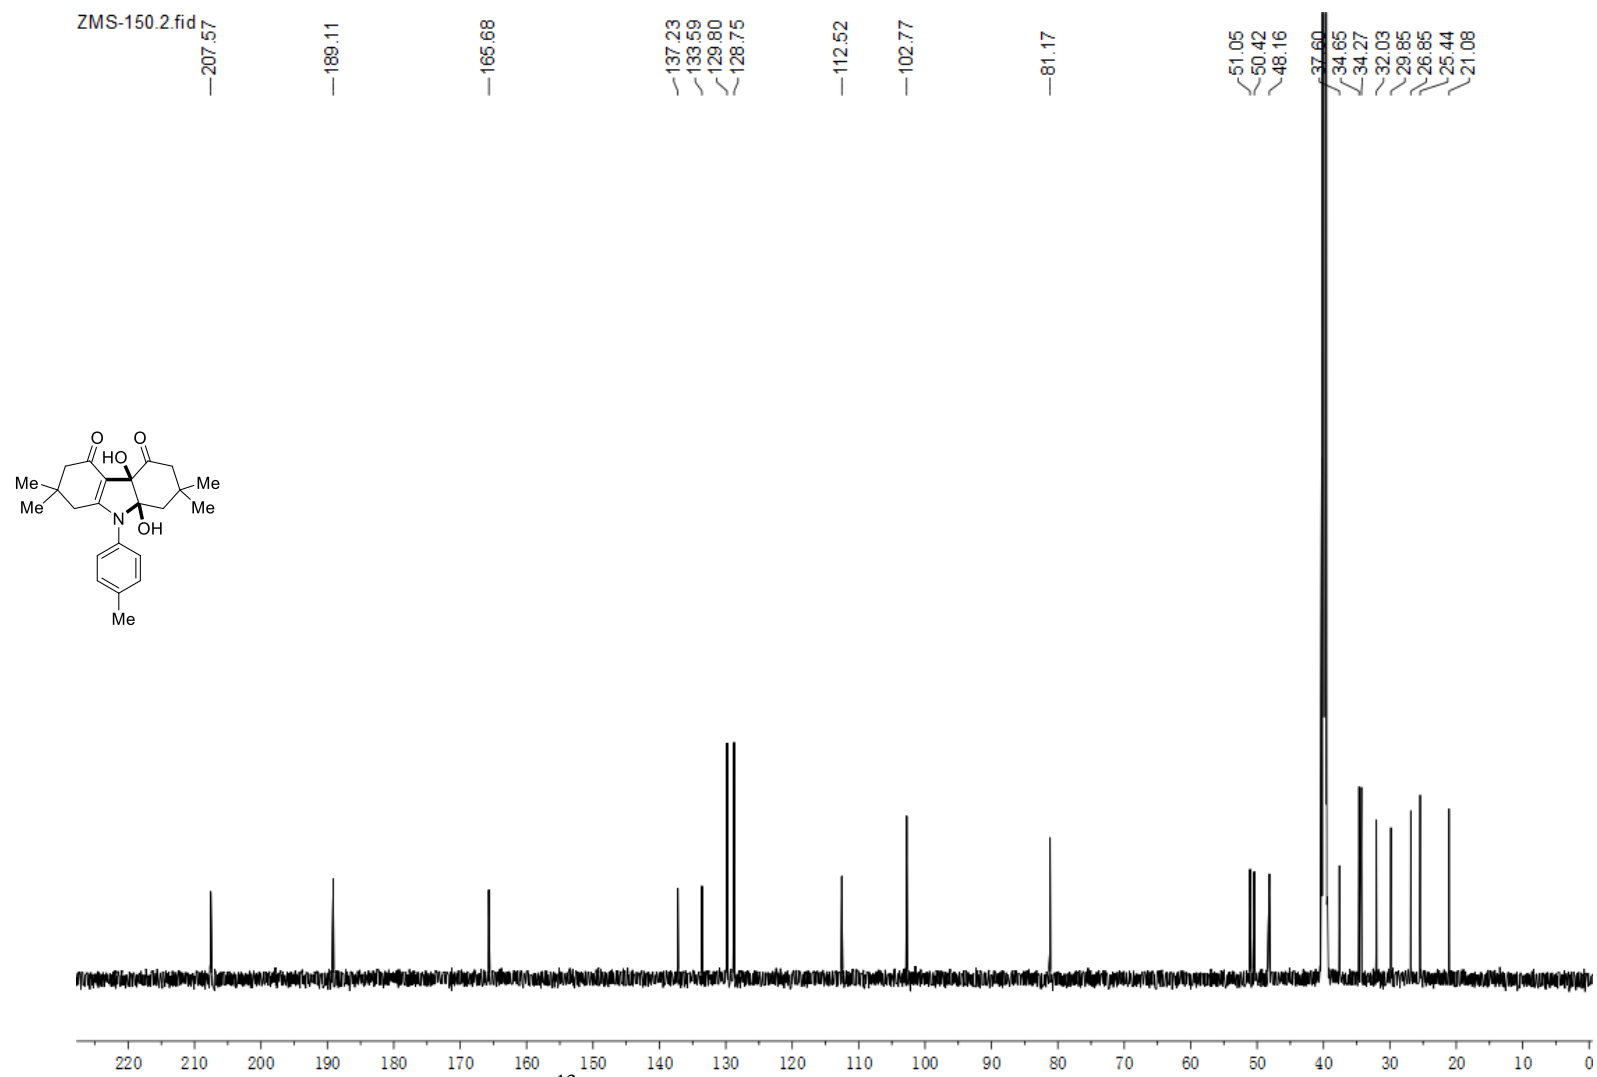

**Figure S41.**  $^{13}\text{C}$  NMR (150 MHz,  $\text{DMSO}-d_6$ ) spectra of compound **3t**

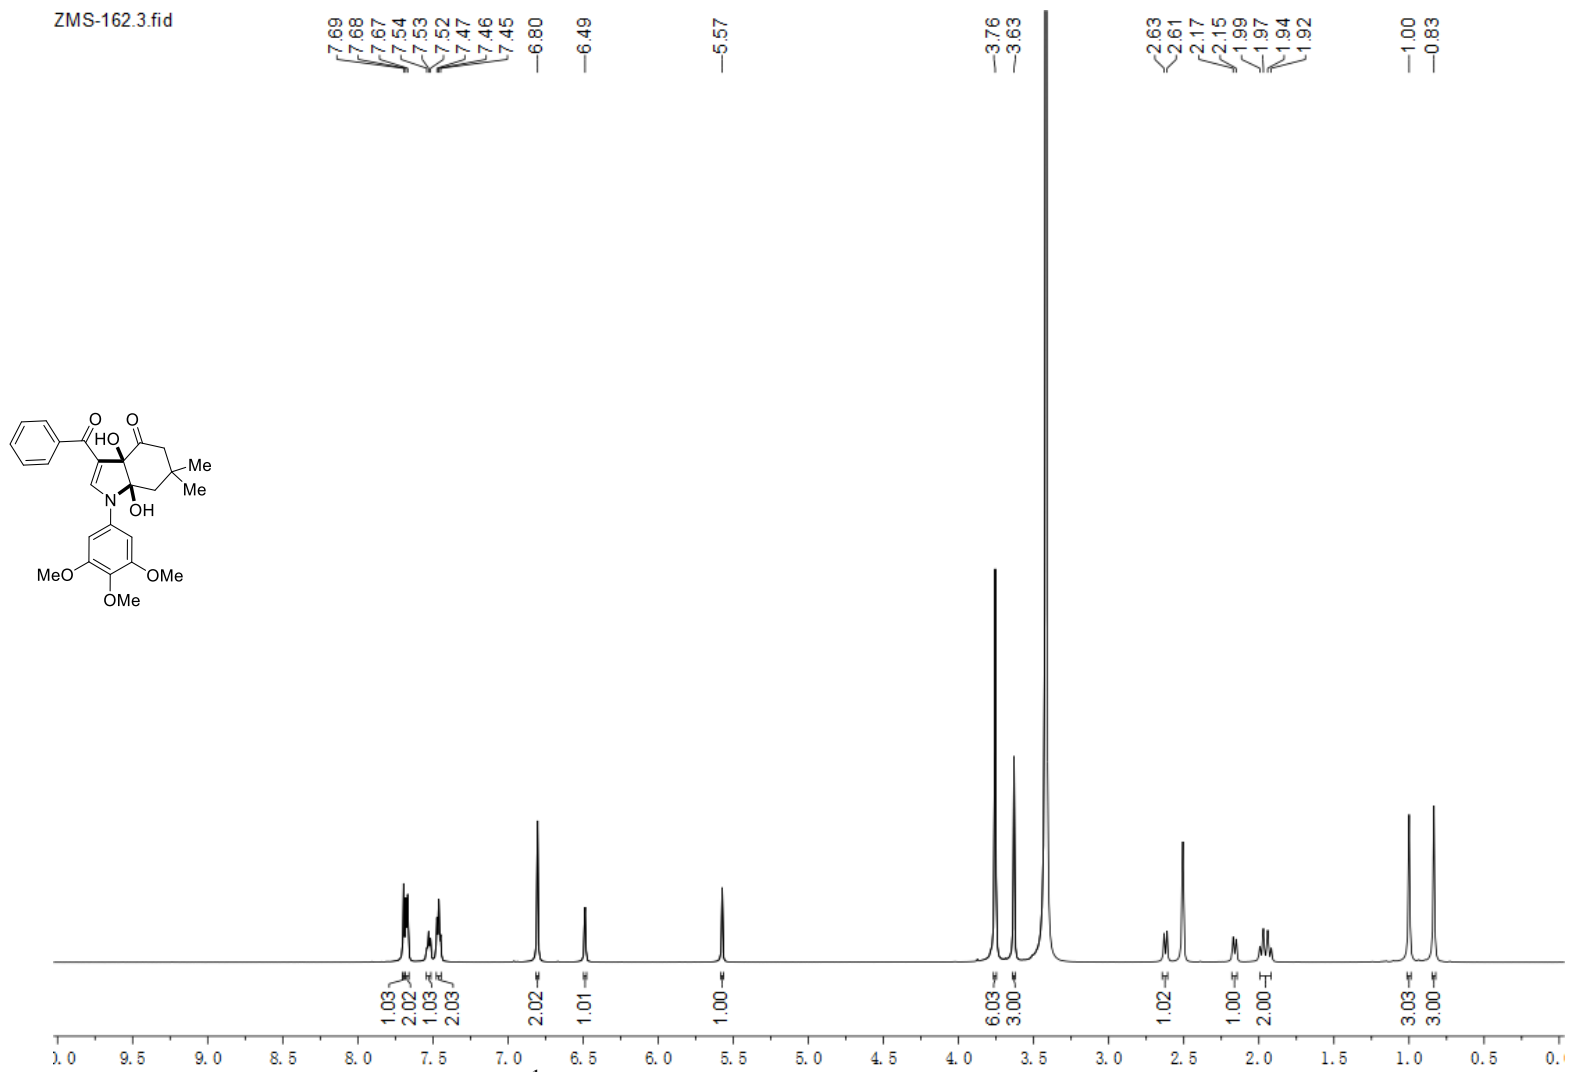

**Figure S42.** <sup>1</sup>H NMR (600 MHz, DMSO-*d*<sub>6</sub>) spectra of compound **3u**

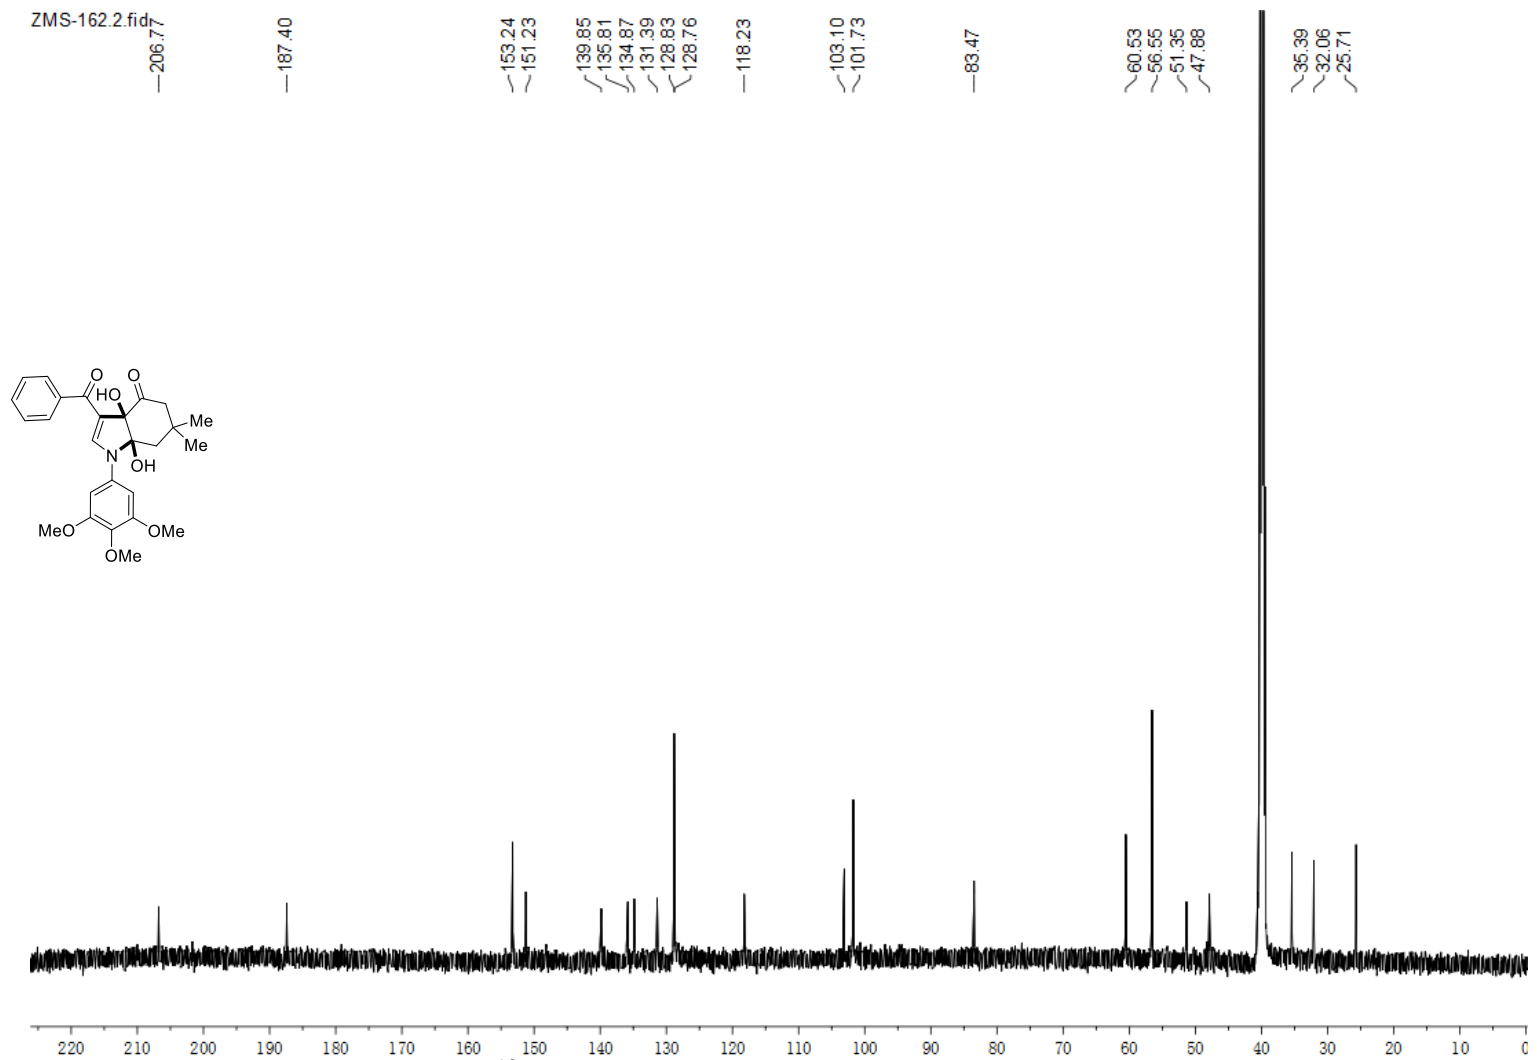

Figure S43.  $^{13}\text{C}$  NMR (150 MHz,  $\text{DMSO-}d_6$ ) spectra of compound **3u**

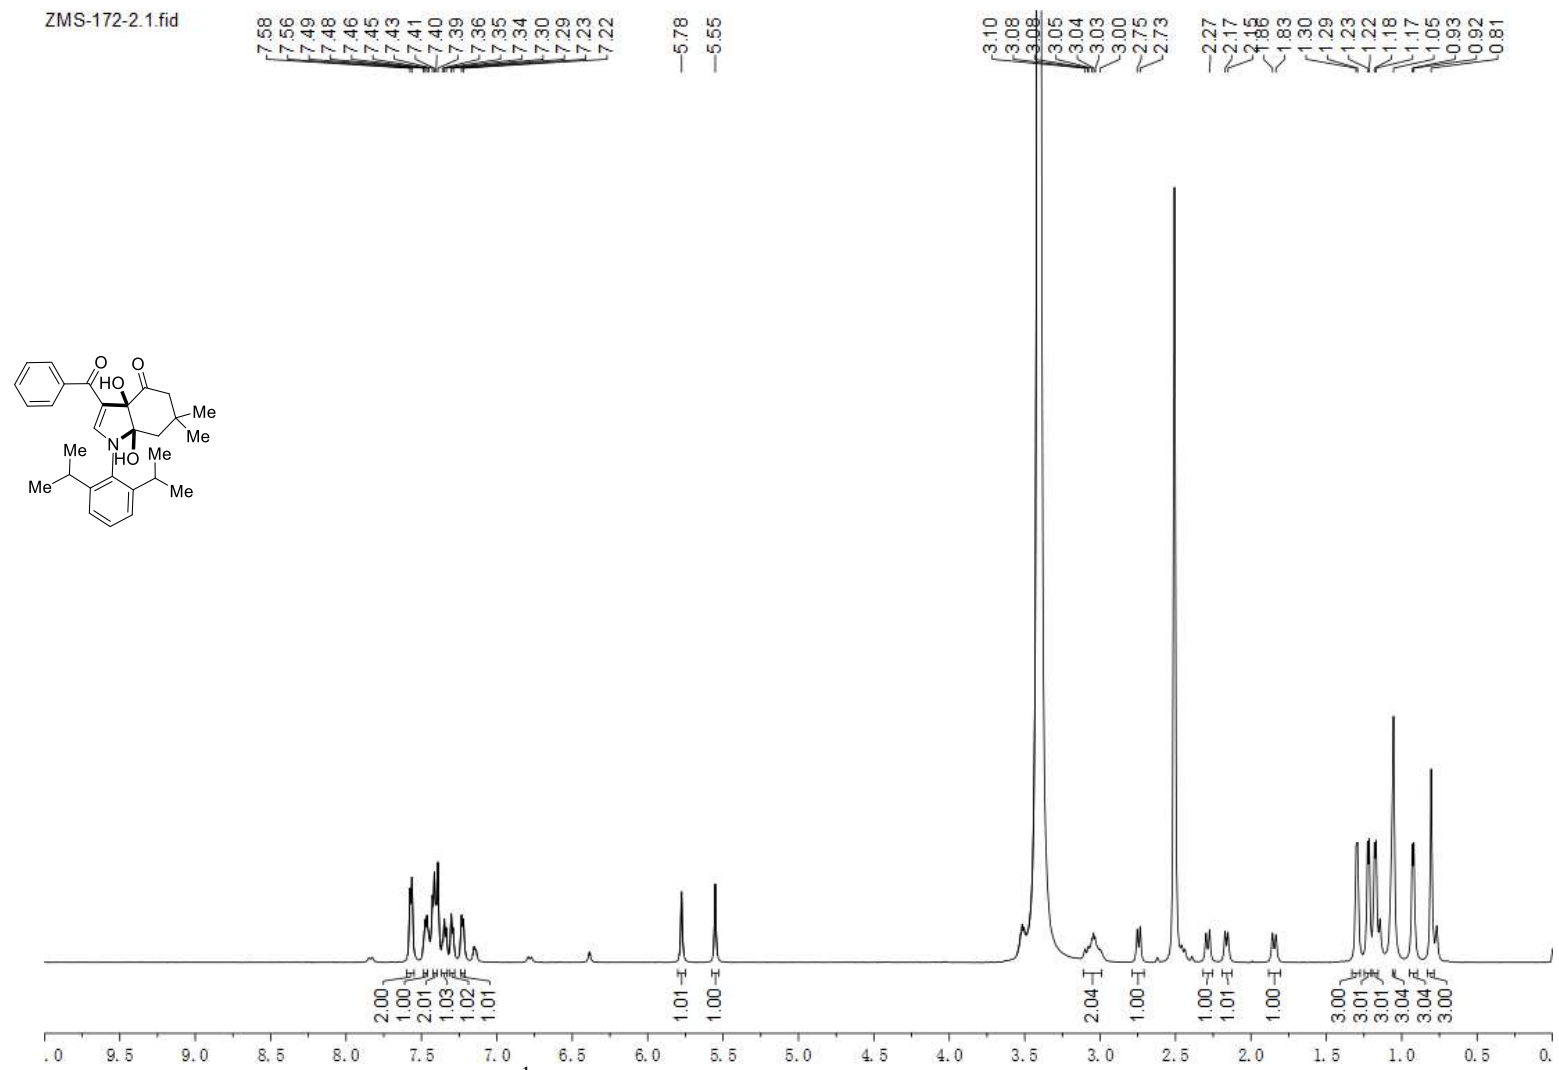

**Figure S44.**  $^1\text{H}$  NMR (600 MHz,  $\text{DMSO-}d_6$ ) spectra of compound **3v**

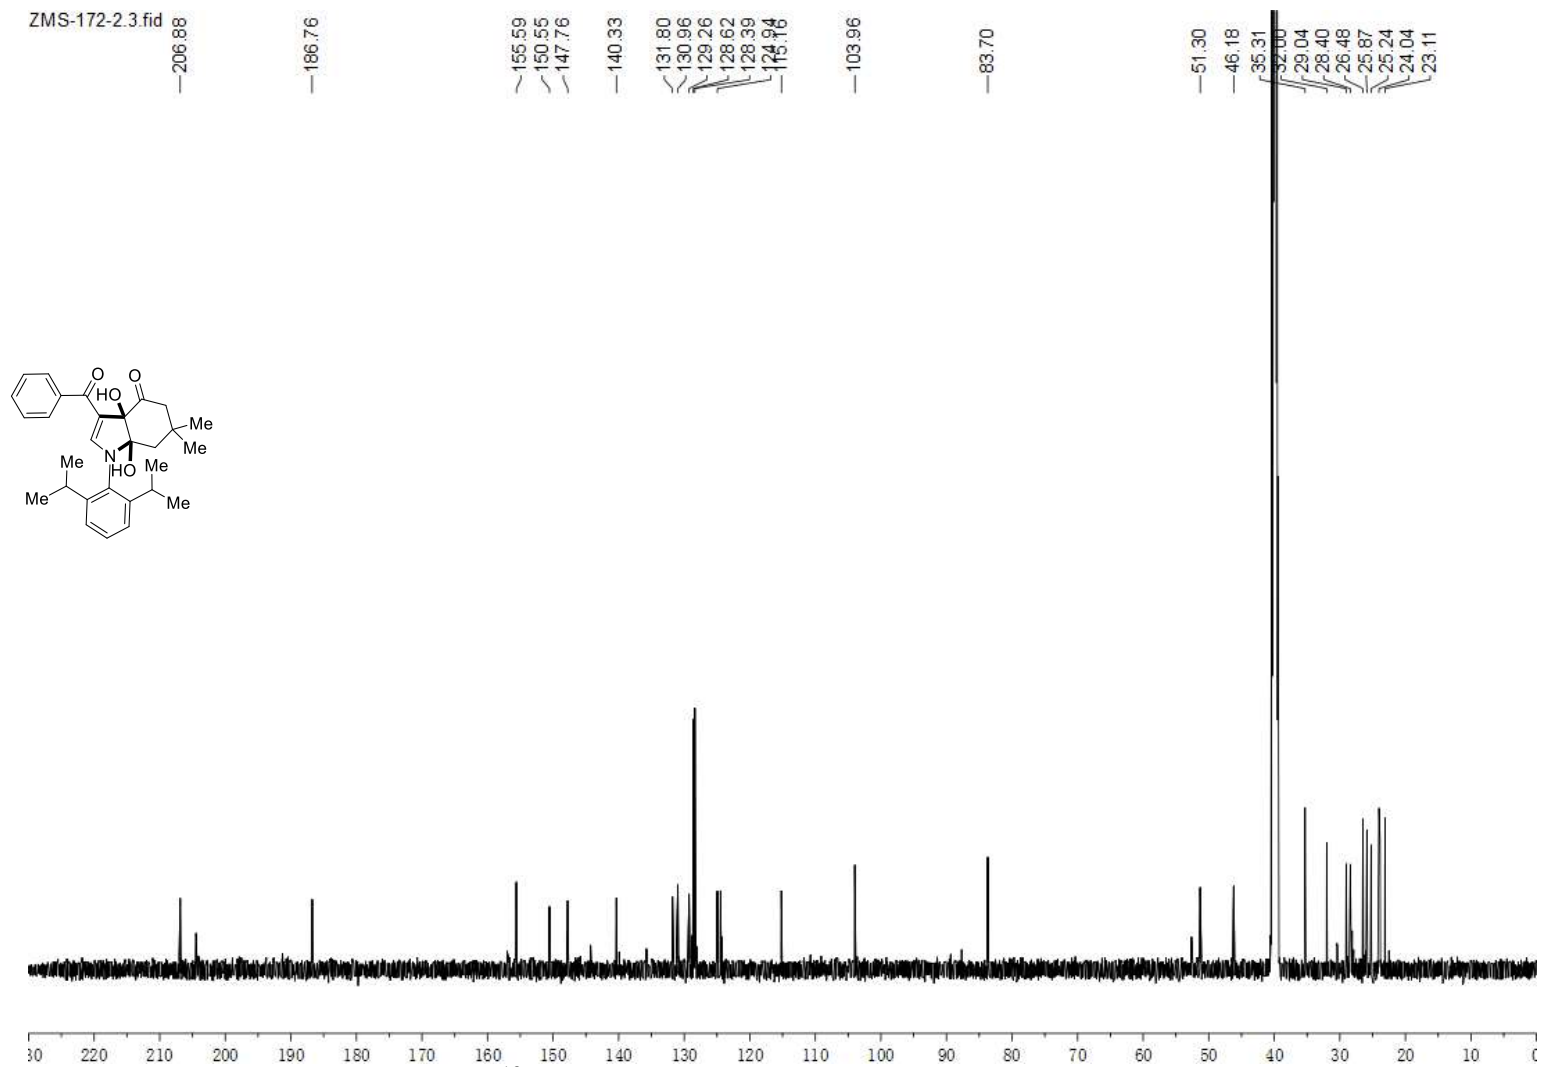

**Figure S45.**  $^{13}\text{C}$  NMR (150 MHz,  $\text{DMSO-}d_6$ ) spectra of compound **3v**

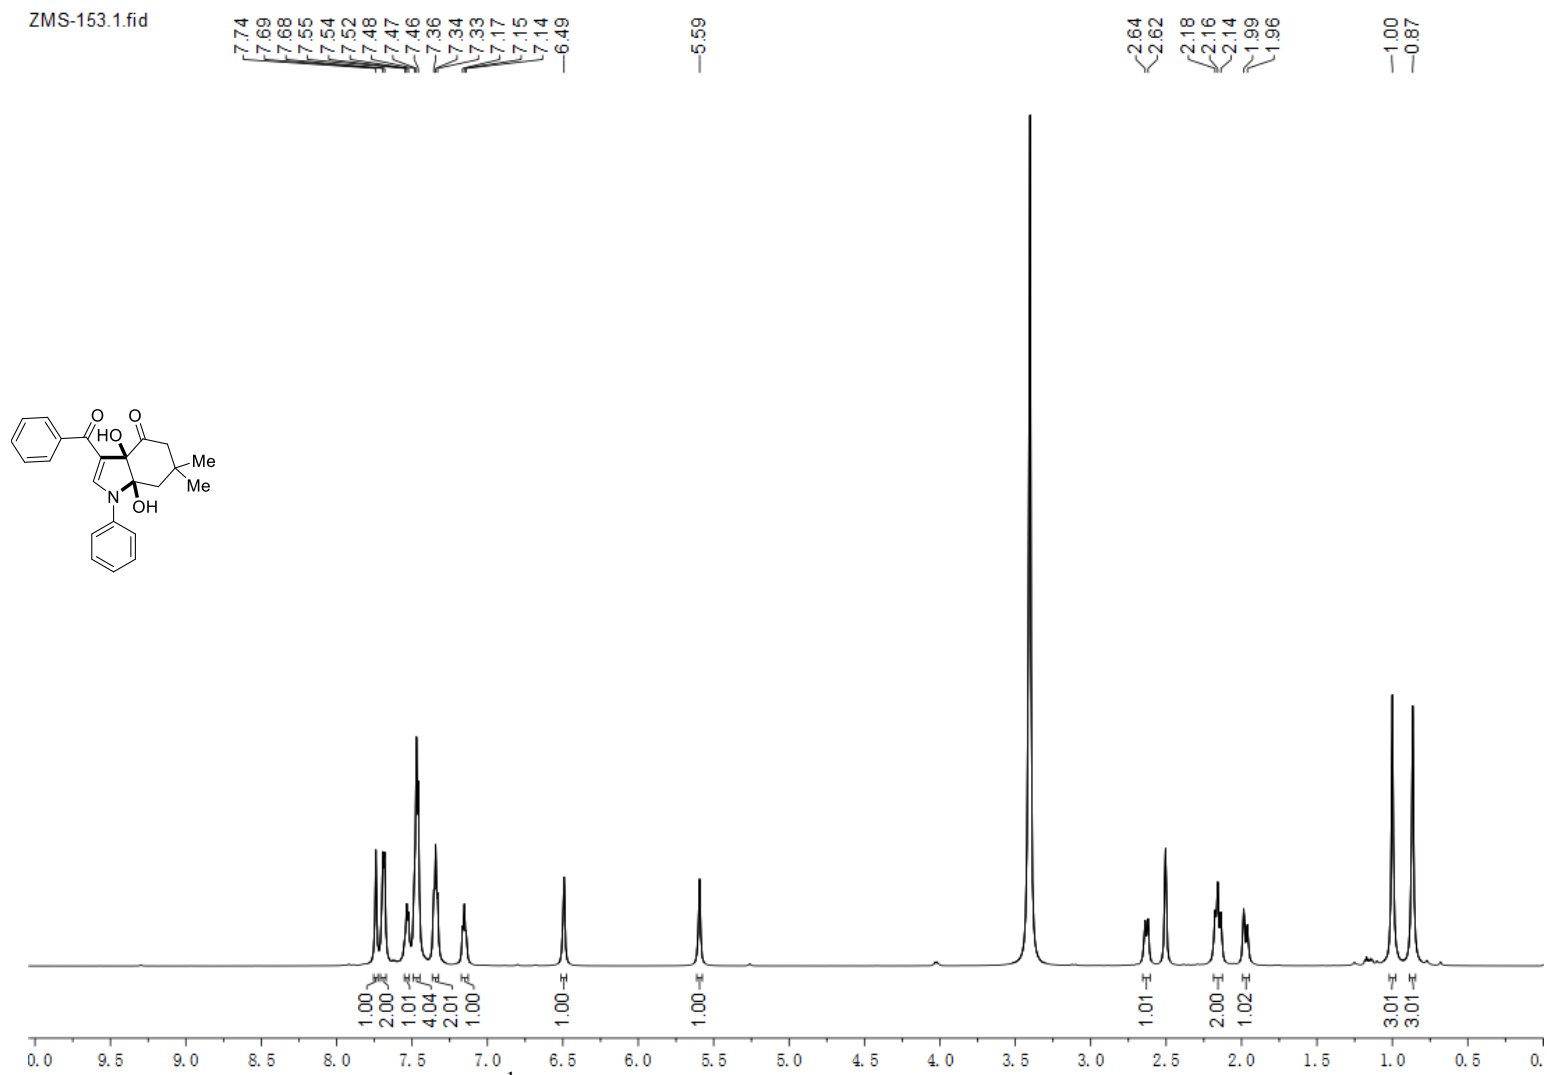

**Figure S46.**  $^1\text{H}$  NMR (600 MHz,  $\text{DMSO-}d_6$ ) spectra of compound **3w**

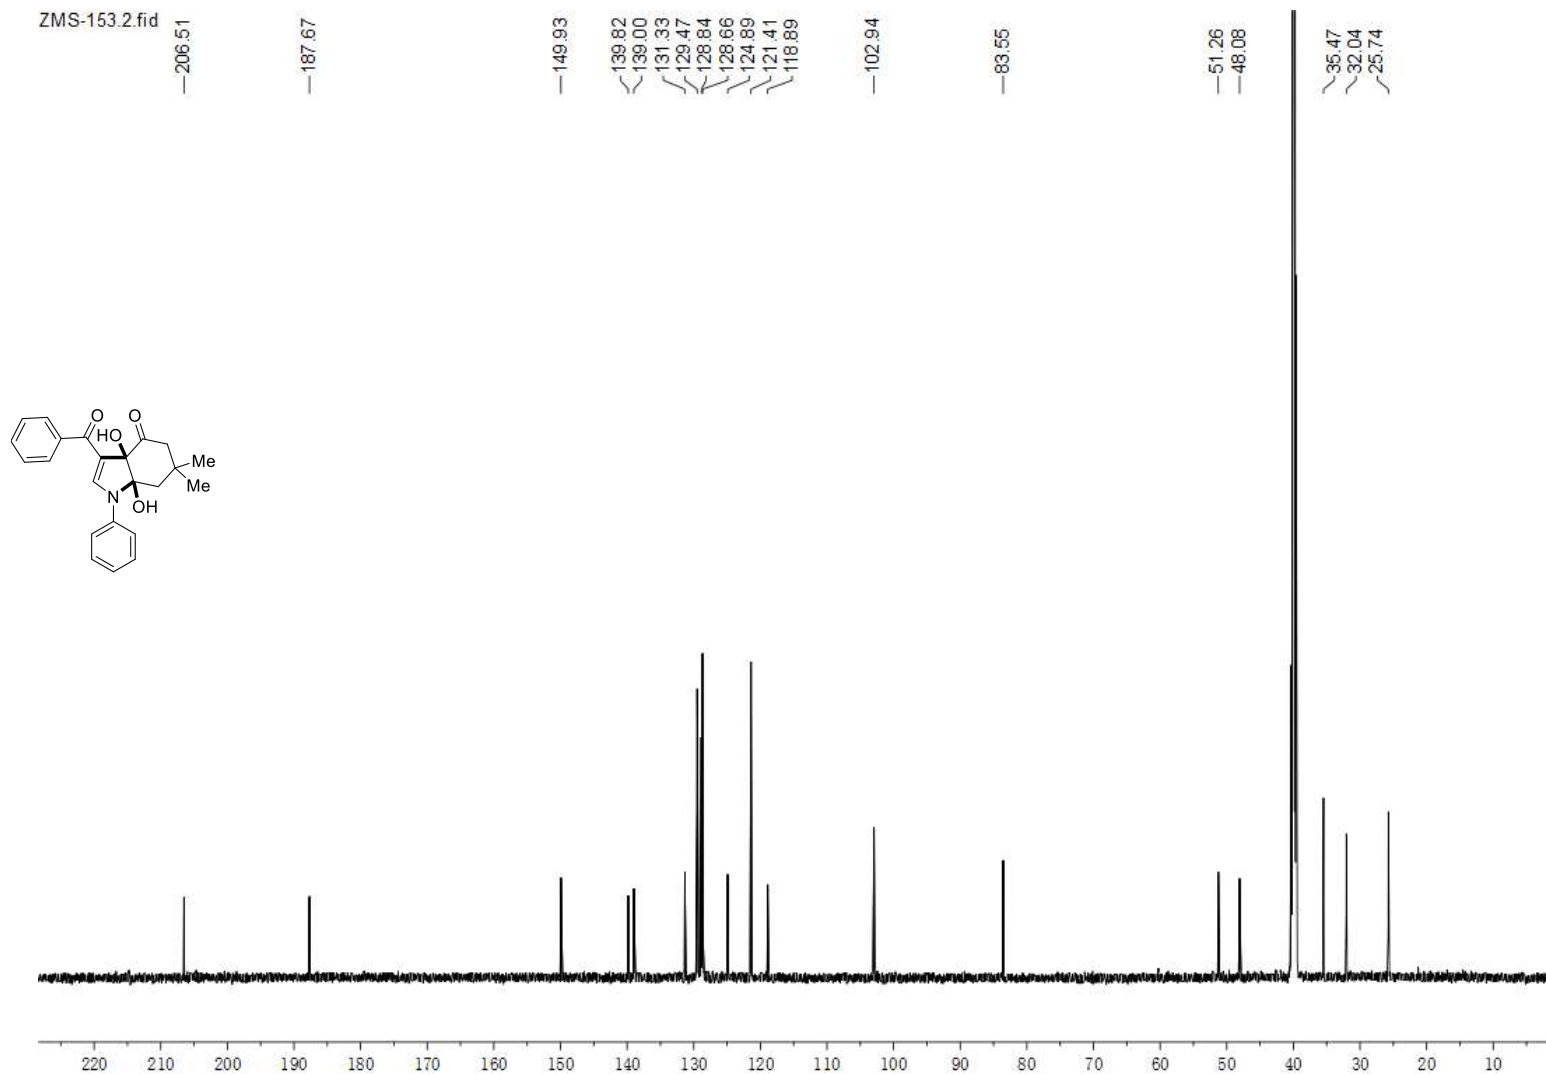



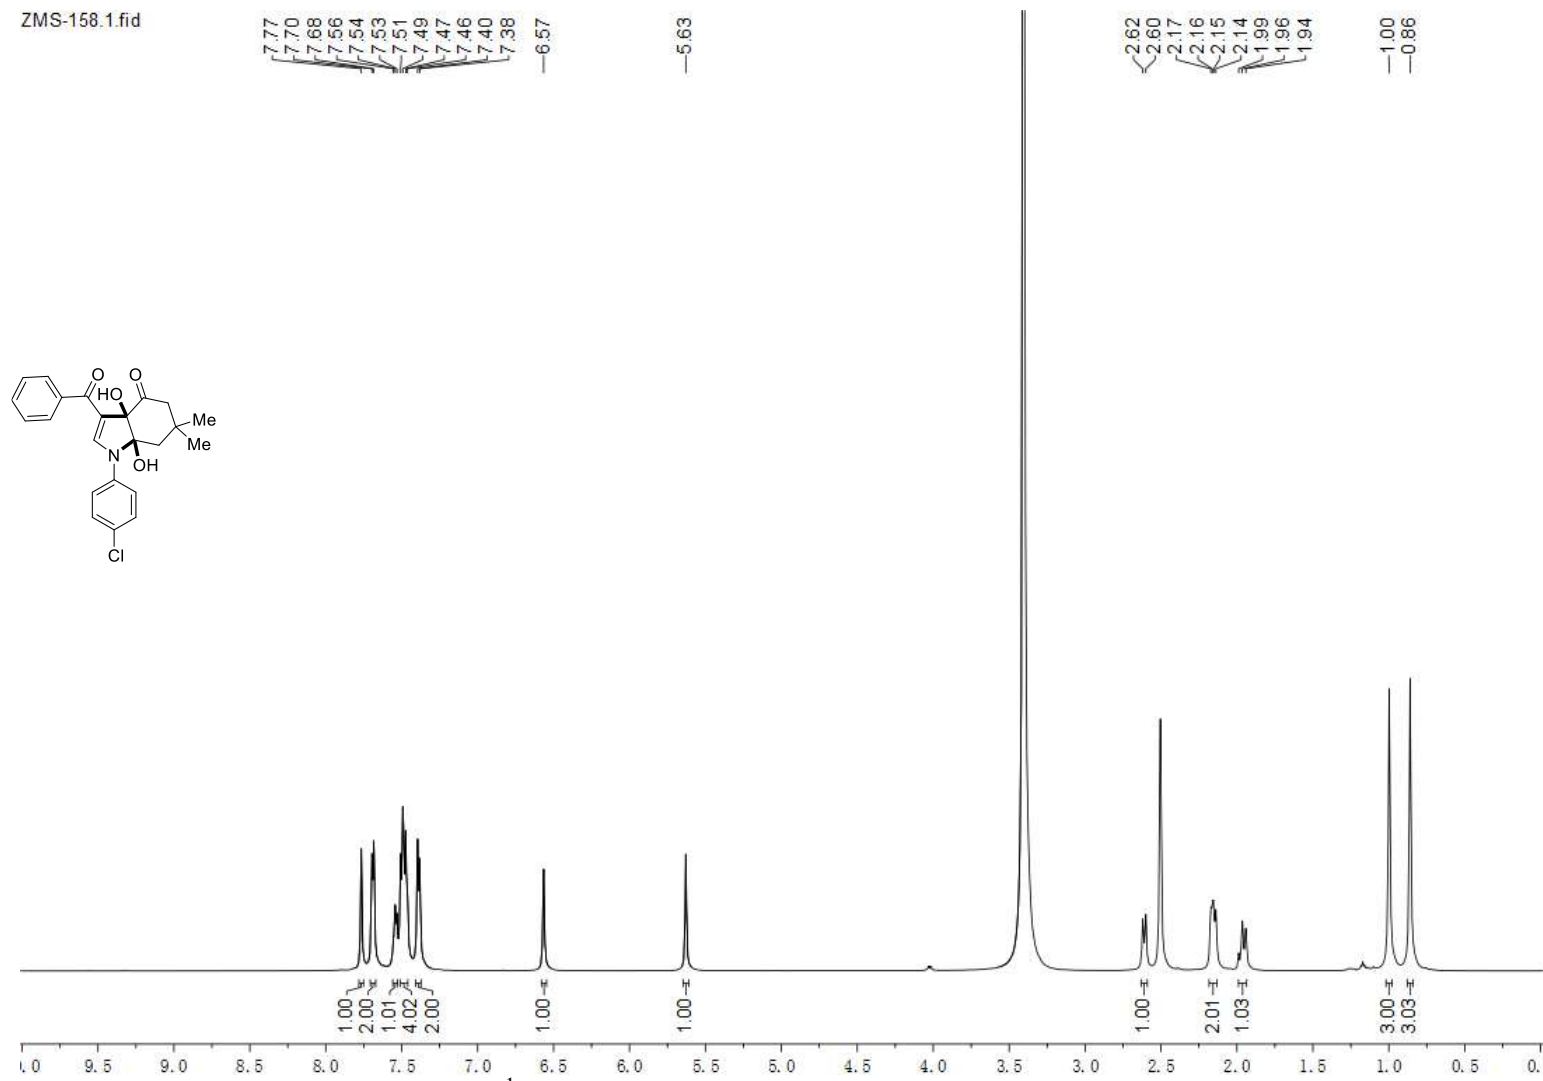

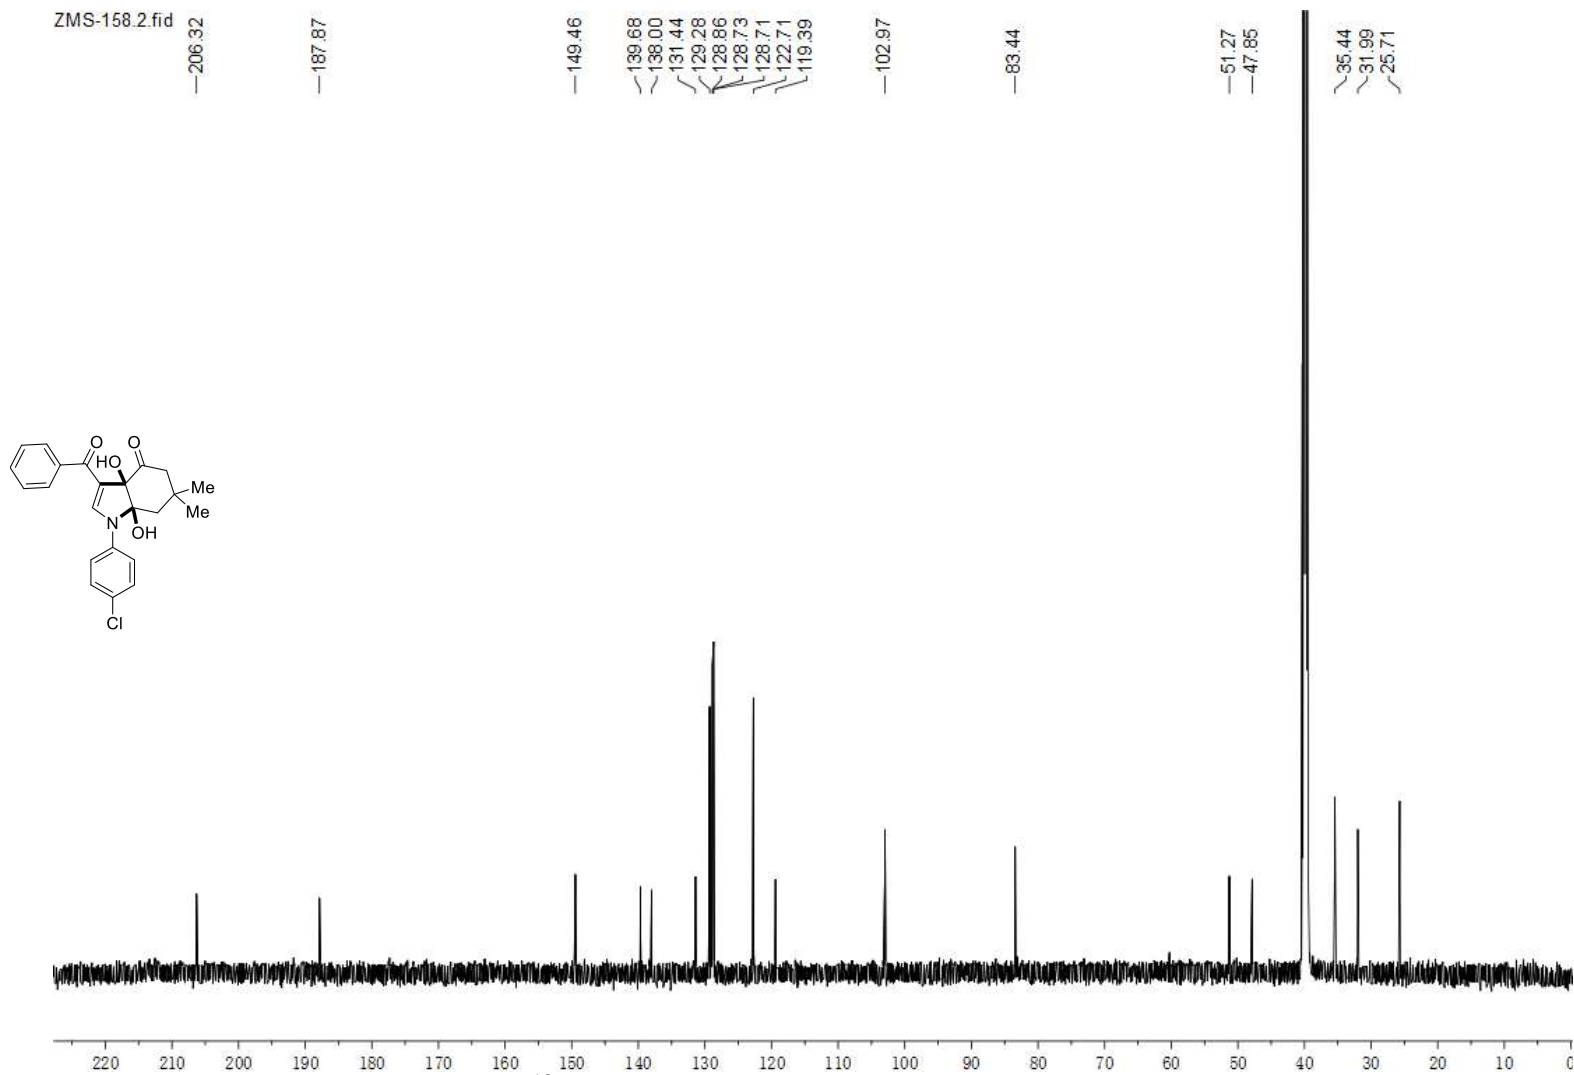

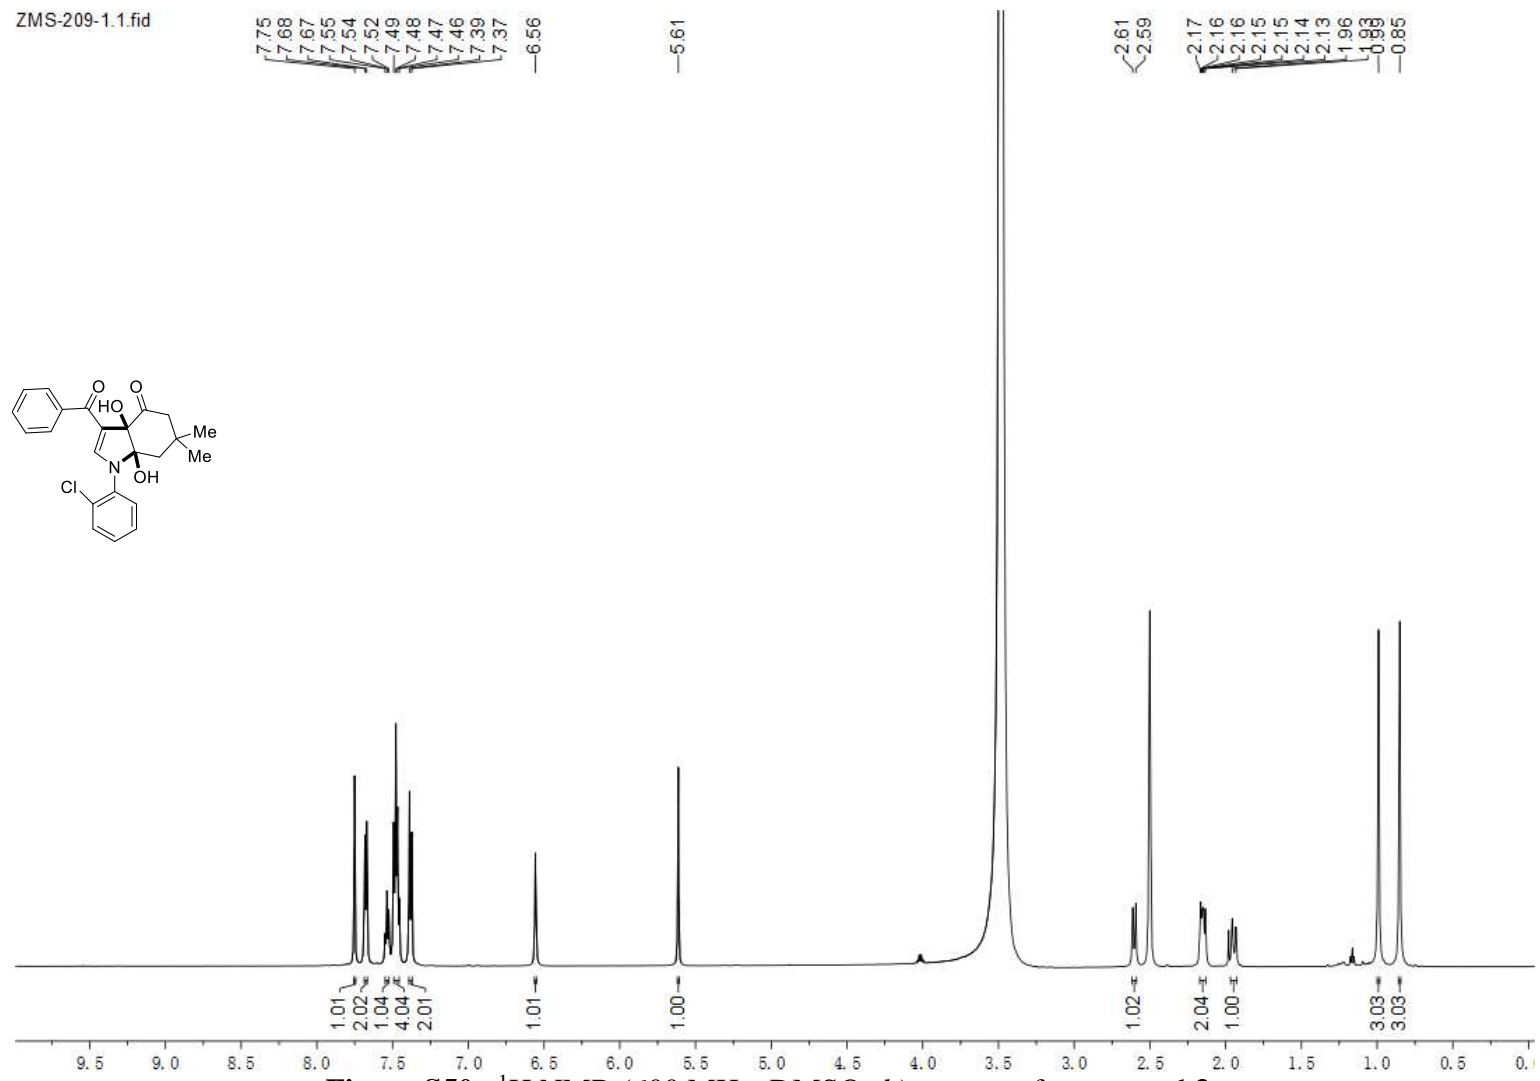

**Figure S50.**  $^1\text{H}$  NMR (600 MHz,  $\text{DMSO-}d_6$ ) spectra of compound **3y**

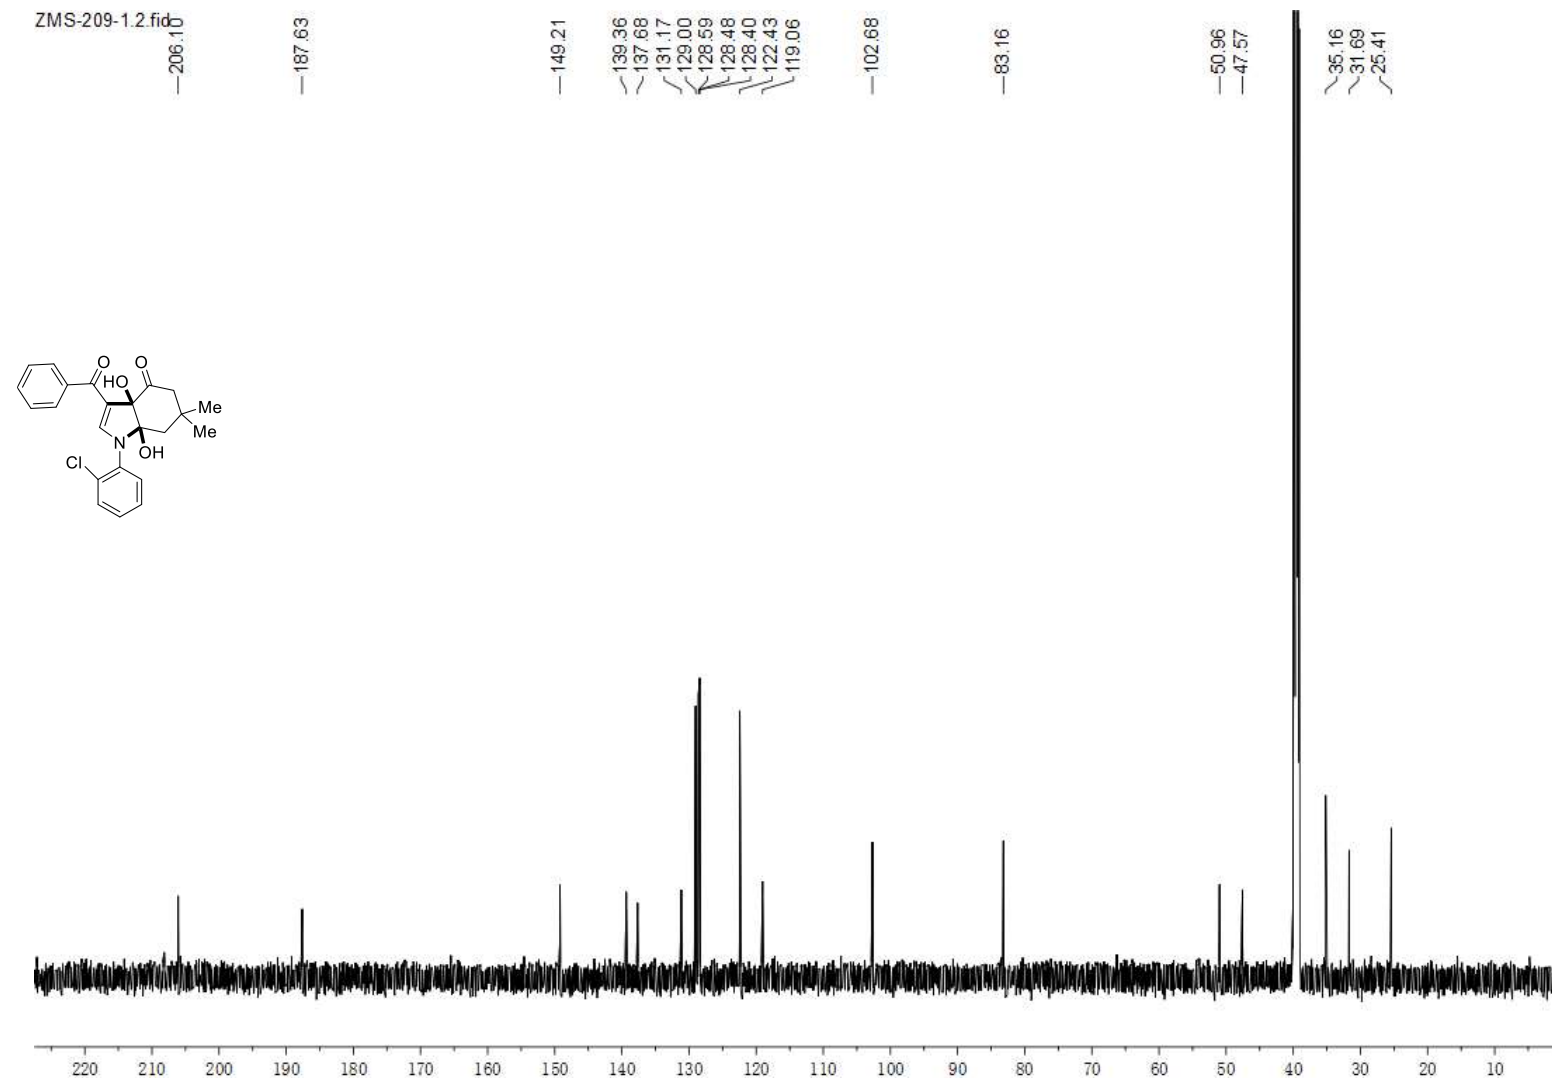

Figure S51. <sup>13</sup>C NMR (150 MHz, DMSO-*d*<sub>6</sub>) spectra of compound 3y

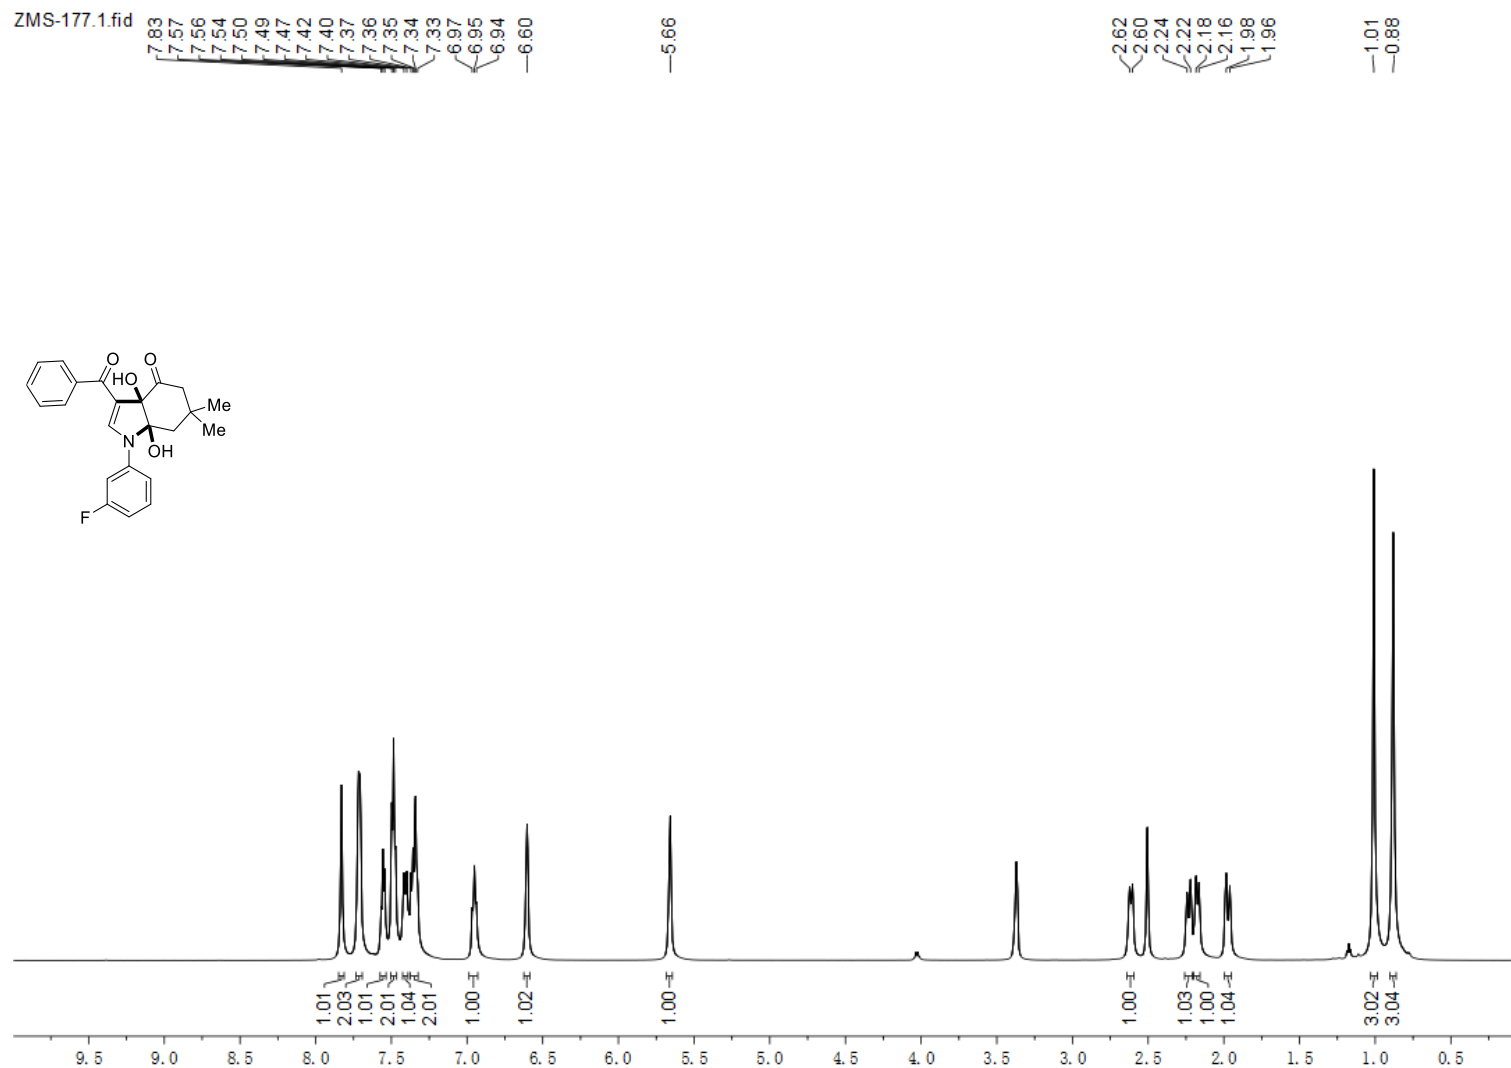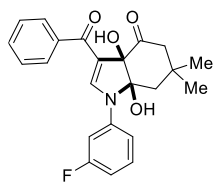

**Figure S52.**  $^1\text{H}$  NMR (600 MHz,  $\text{DMSO-}d_6$ ) spectra of compound **3z**

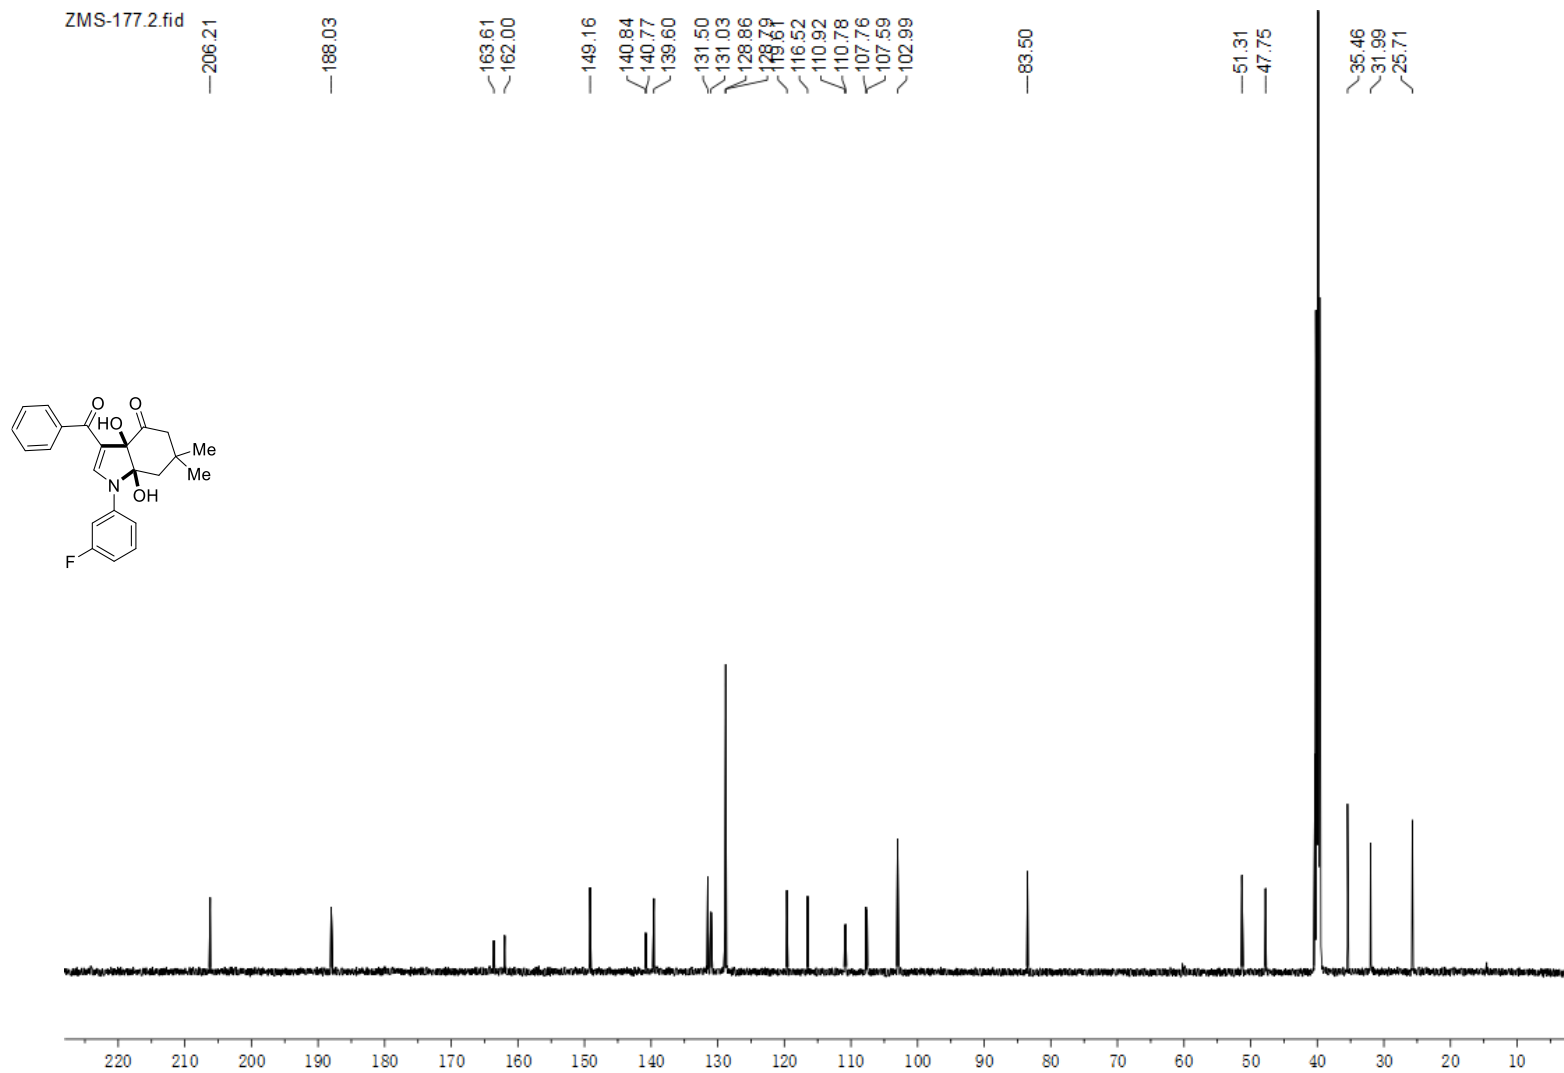

**Figure S53.**  $^{13}\text{C}$  NMR (150 MHz,  $\text{DMSO-}d_6$ ) spectra of compound **3z**

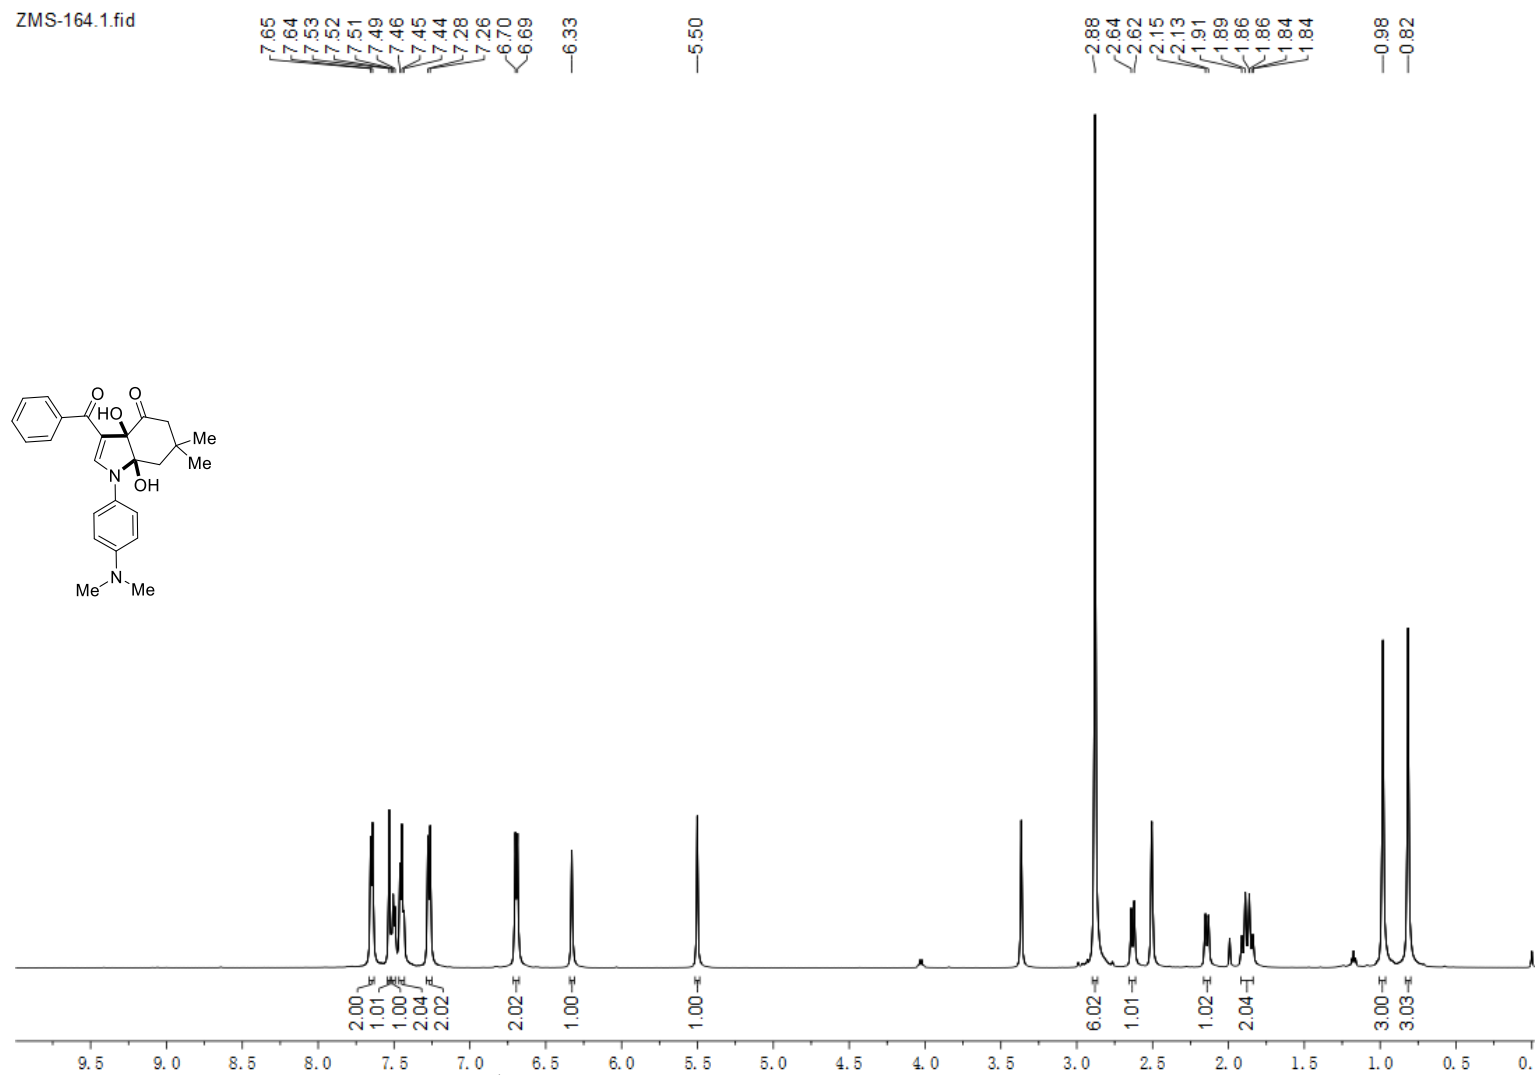

**Figure S54.**  $^1\text{H}$  NMR (600 MHz,  $\text{DMSO-}d_6$ ) spectra of compound **3a'**

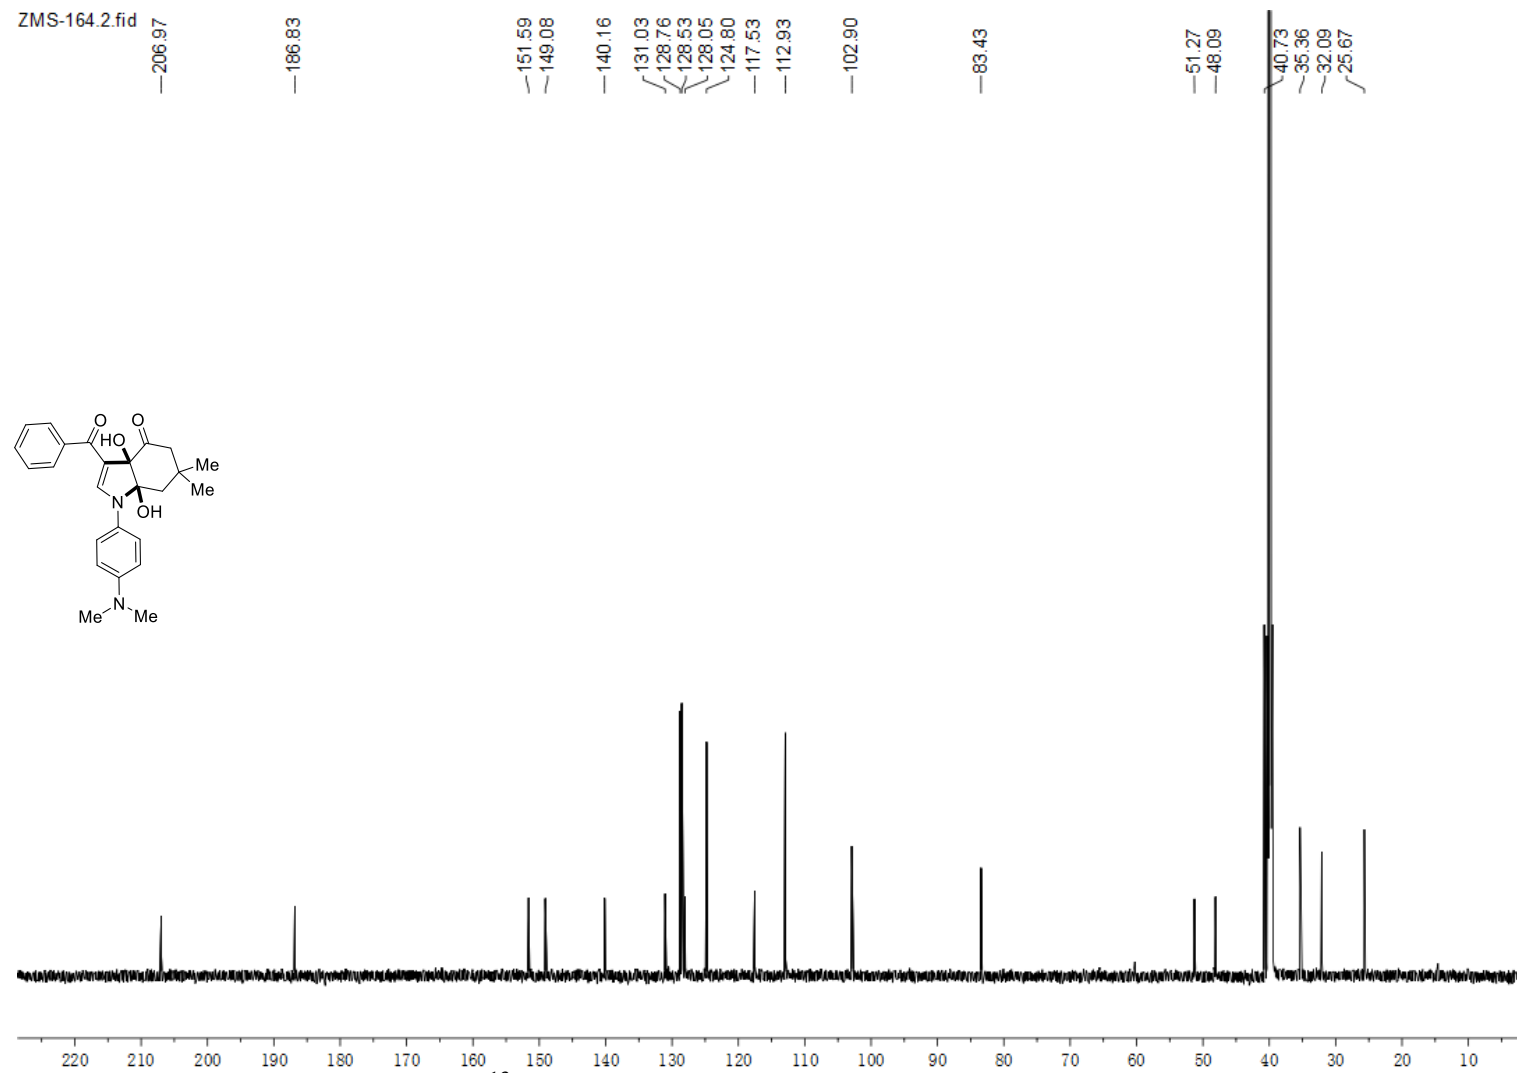

**Figure S55.**  $^{13}\text{C}$  NMR (150 MHz,  $\text{DMSO-}d_6$ ) spectra of compound **3a'**



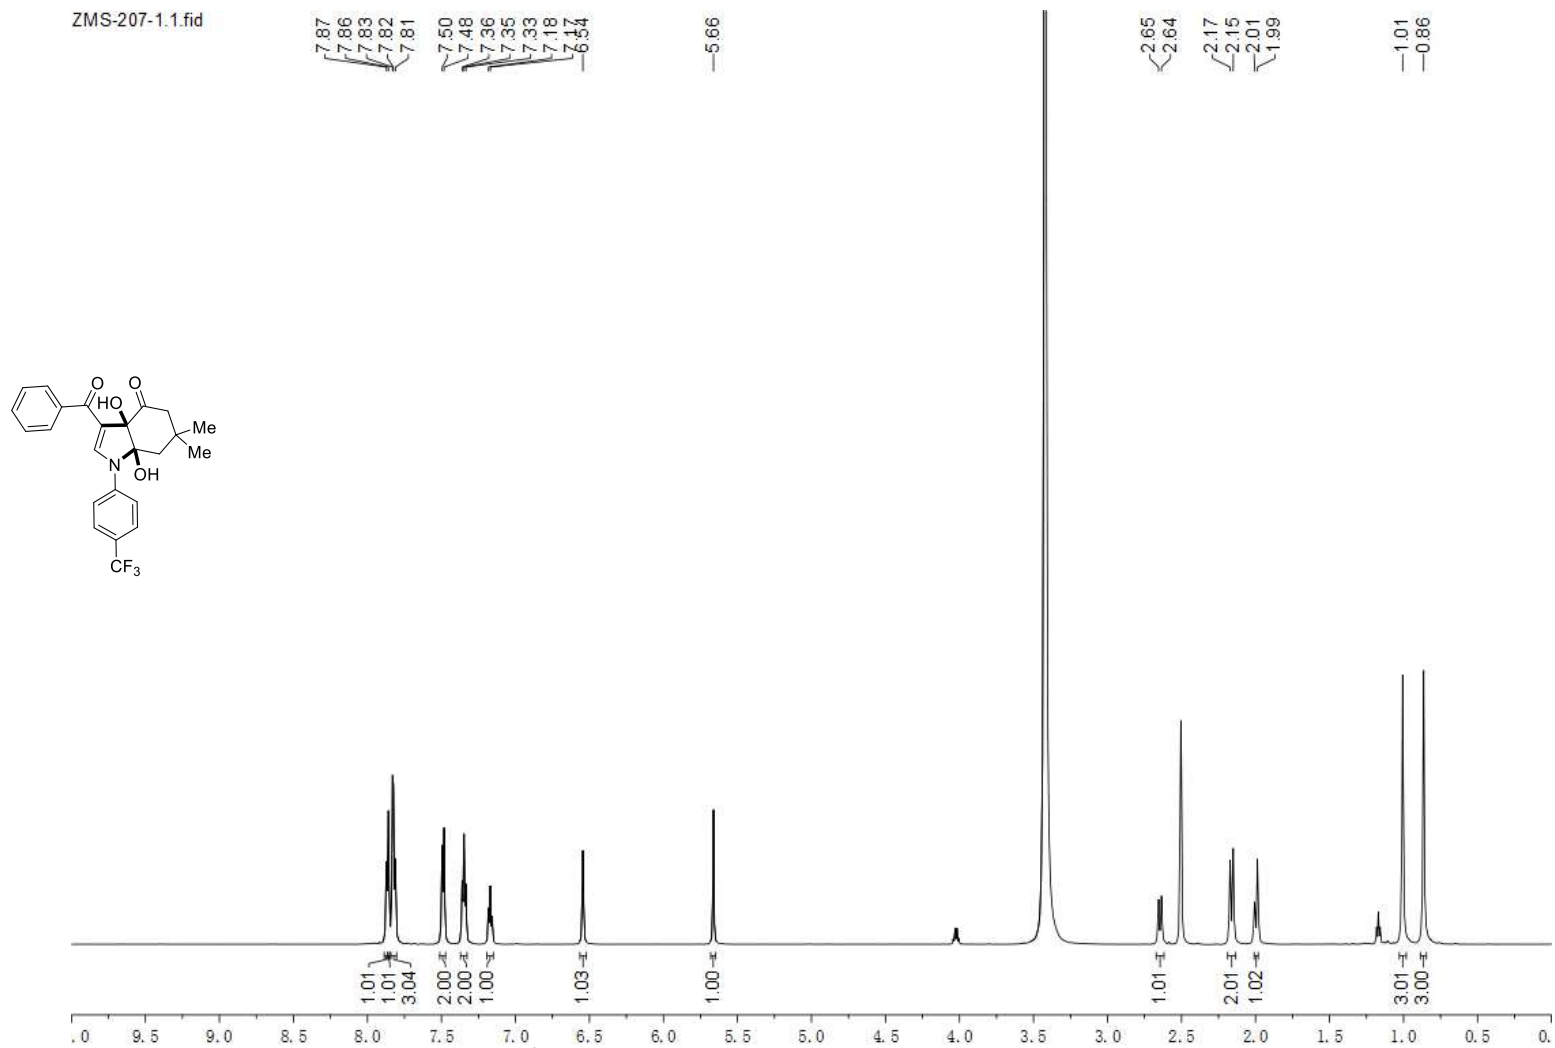

**Figure S56.** <sup>1</sup>H NMR (600 MHz, DMSO-*d*<sub>6</sub>) spectra of compound **3b'**

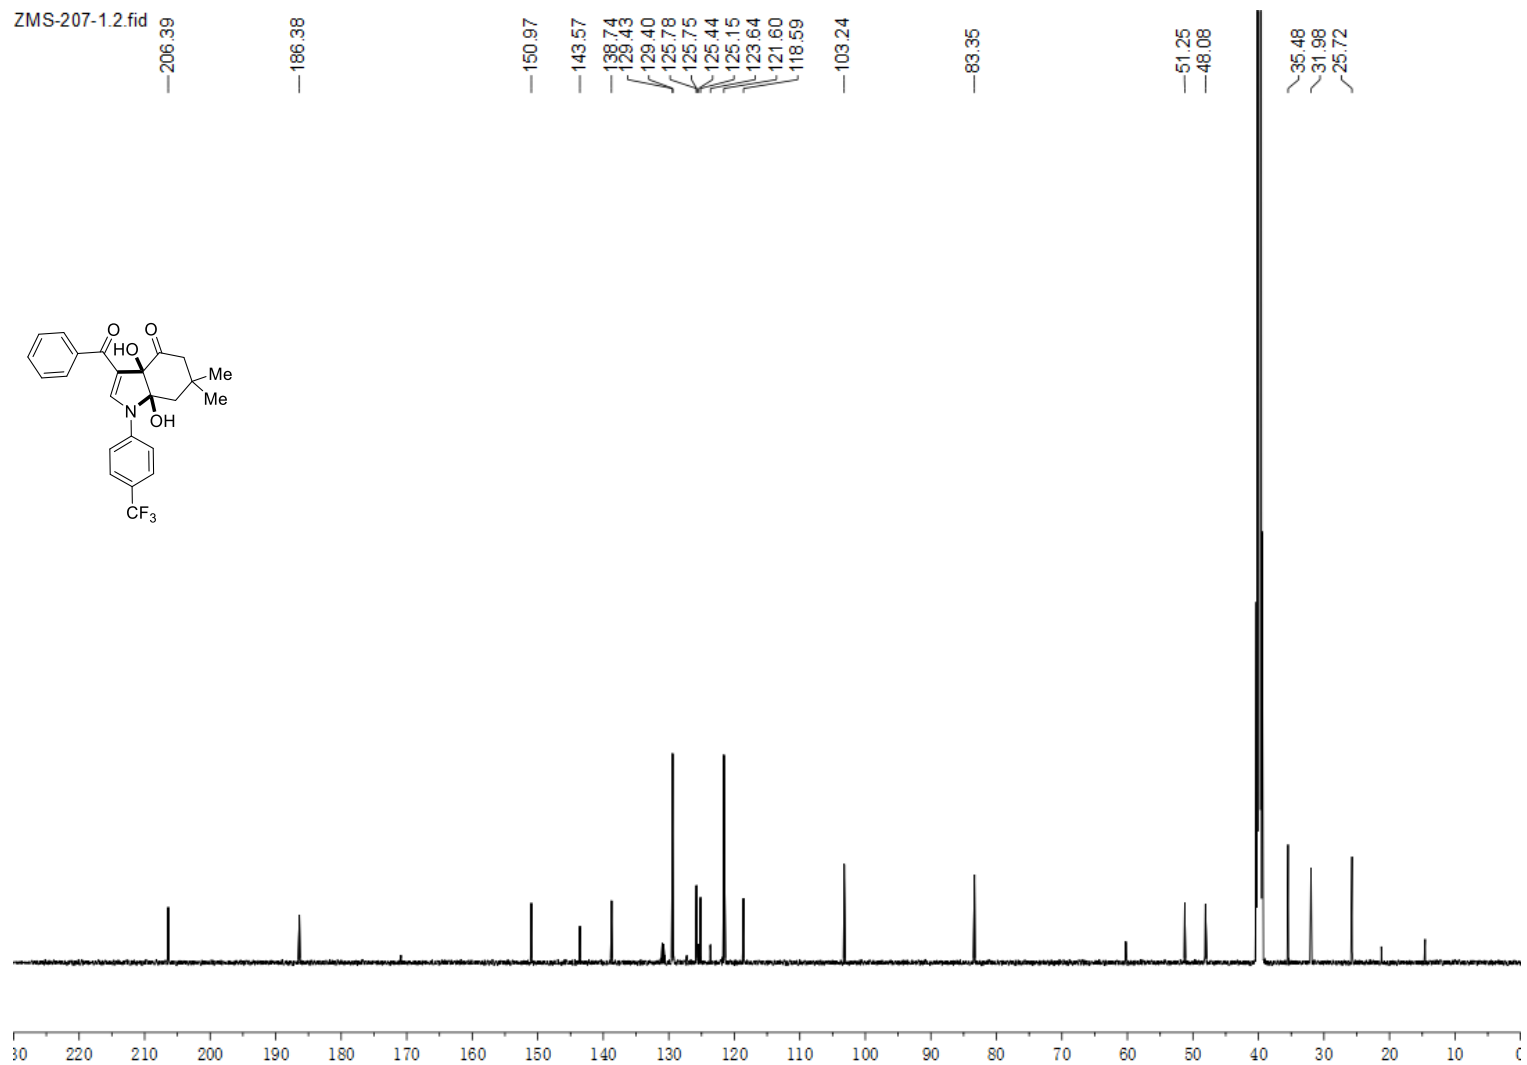

**Figure S57.**  $^{13}\text{C}$  NMR (150 MHz,  $\text{DMSO-}d_6$ ) spectra of compound **3b'**

ZMS-166-1.1.fid

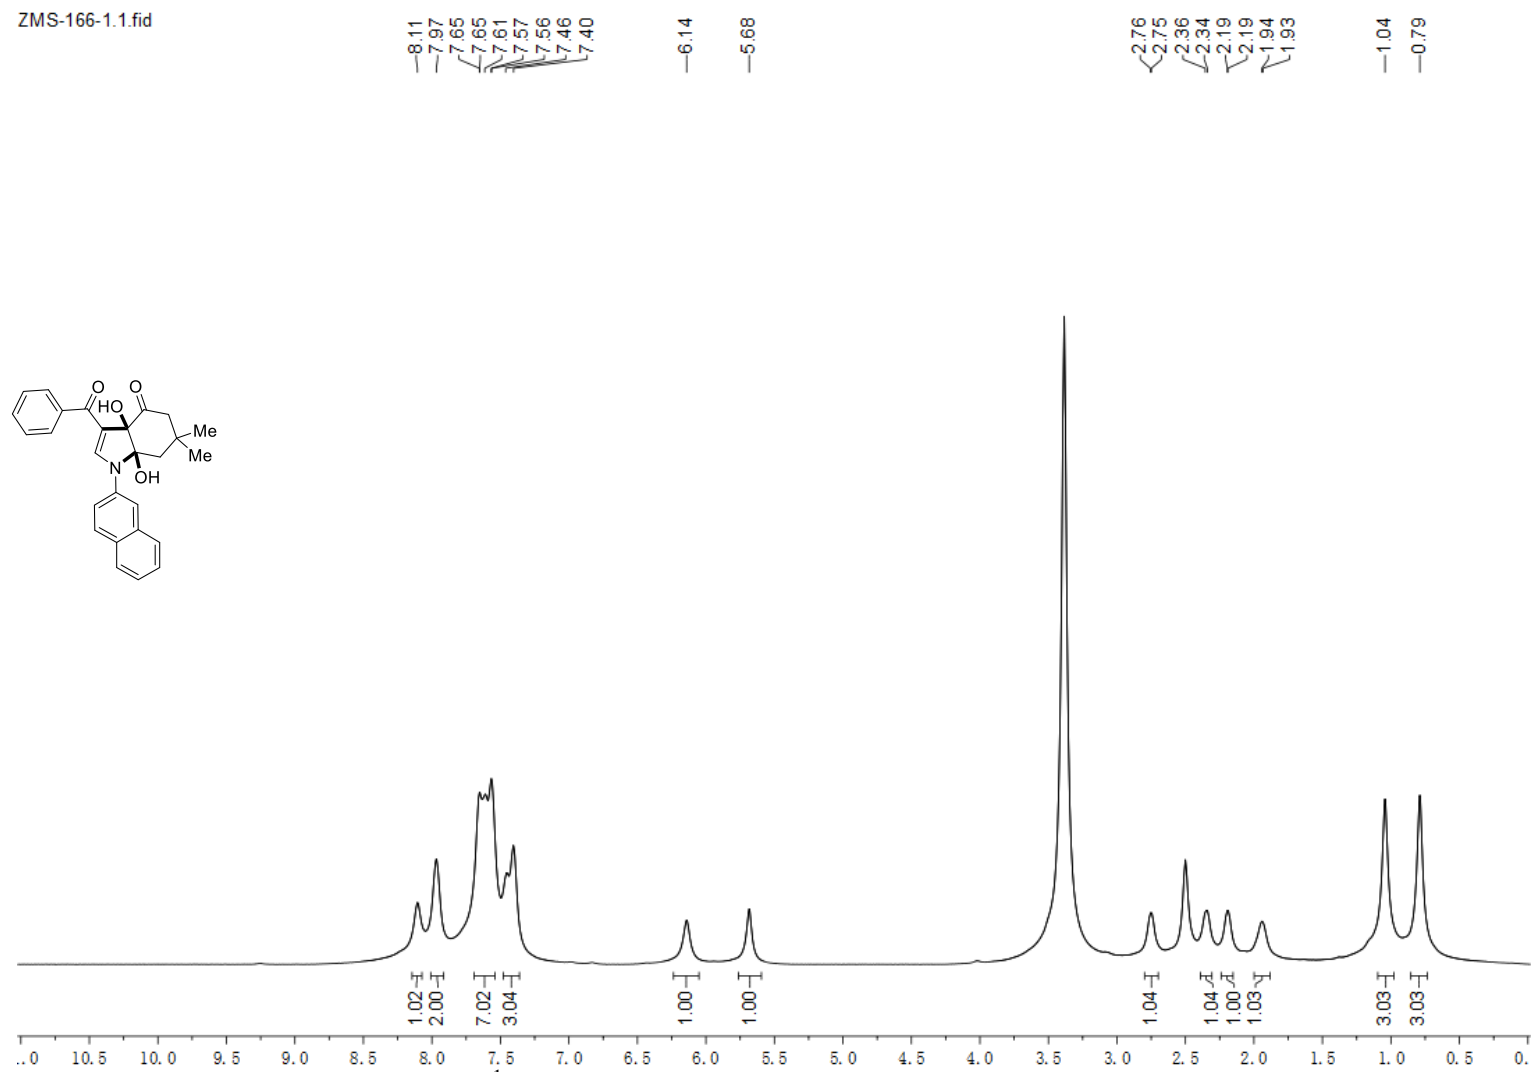

**Figure S58.**  $^1\text{H NMR}$  (600 MHz,  $\text{DMSO-}d_6$ ) spectra of compound **3c'**

ZMS-166-1.2.fid

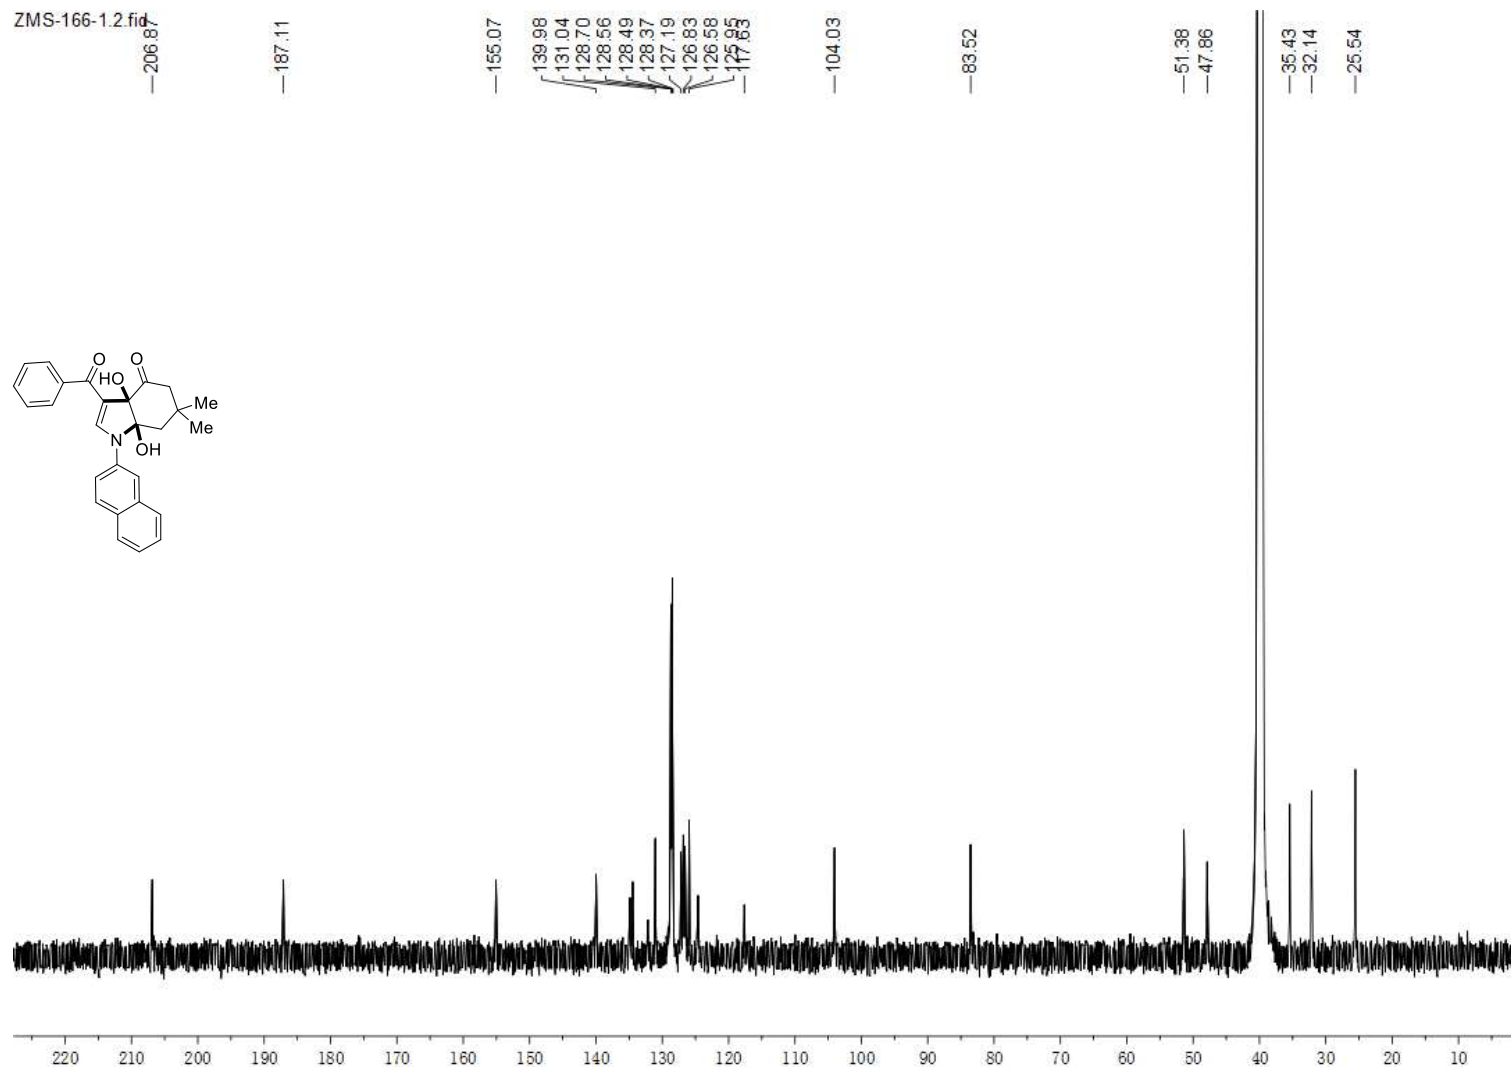

Figure S59.  $^{13}\text{C}$  NMR (150 MHz,  $\text{DMSO-}d_6$ ) spectra of compound 3c'

ZMS-160.1.fid

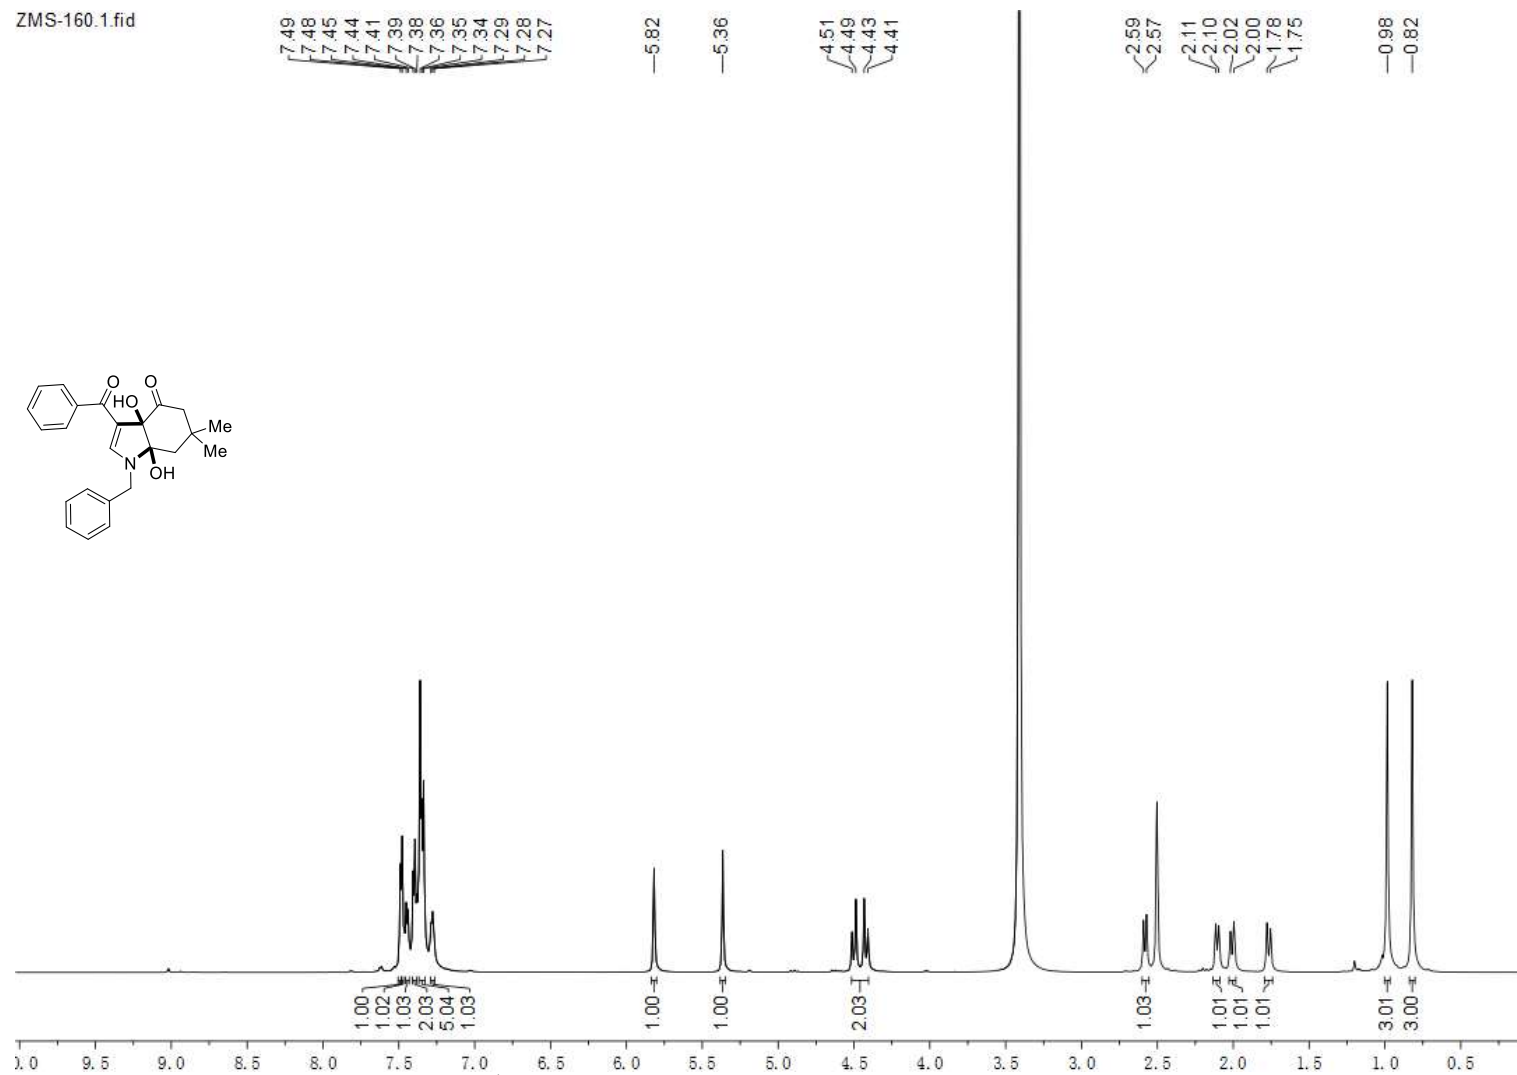

Figure S60. <sup>1</sup>H NMR (600 MHz, DMSO-*d*<sub>6</sub>) spectra of compound 3d'

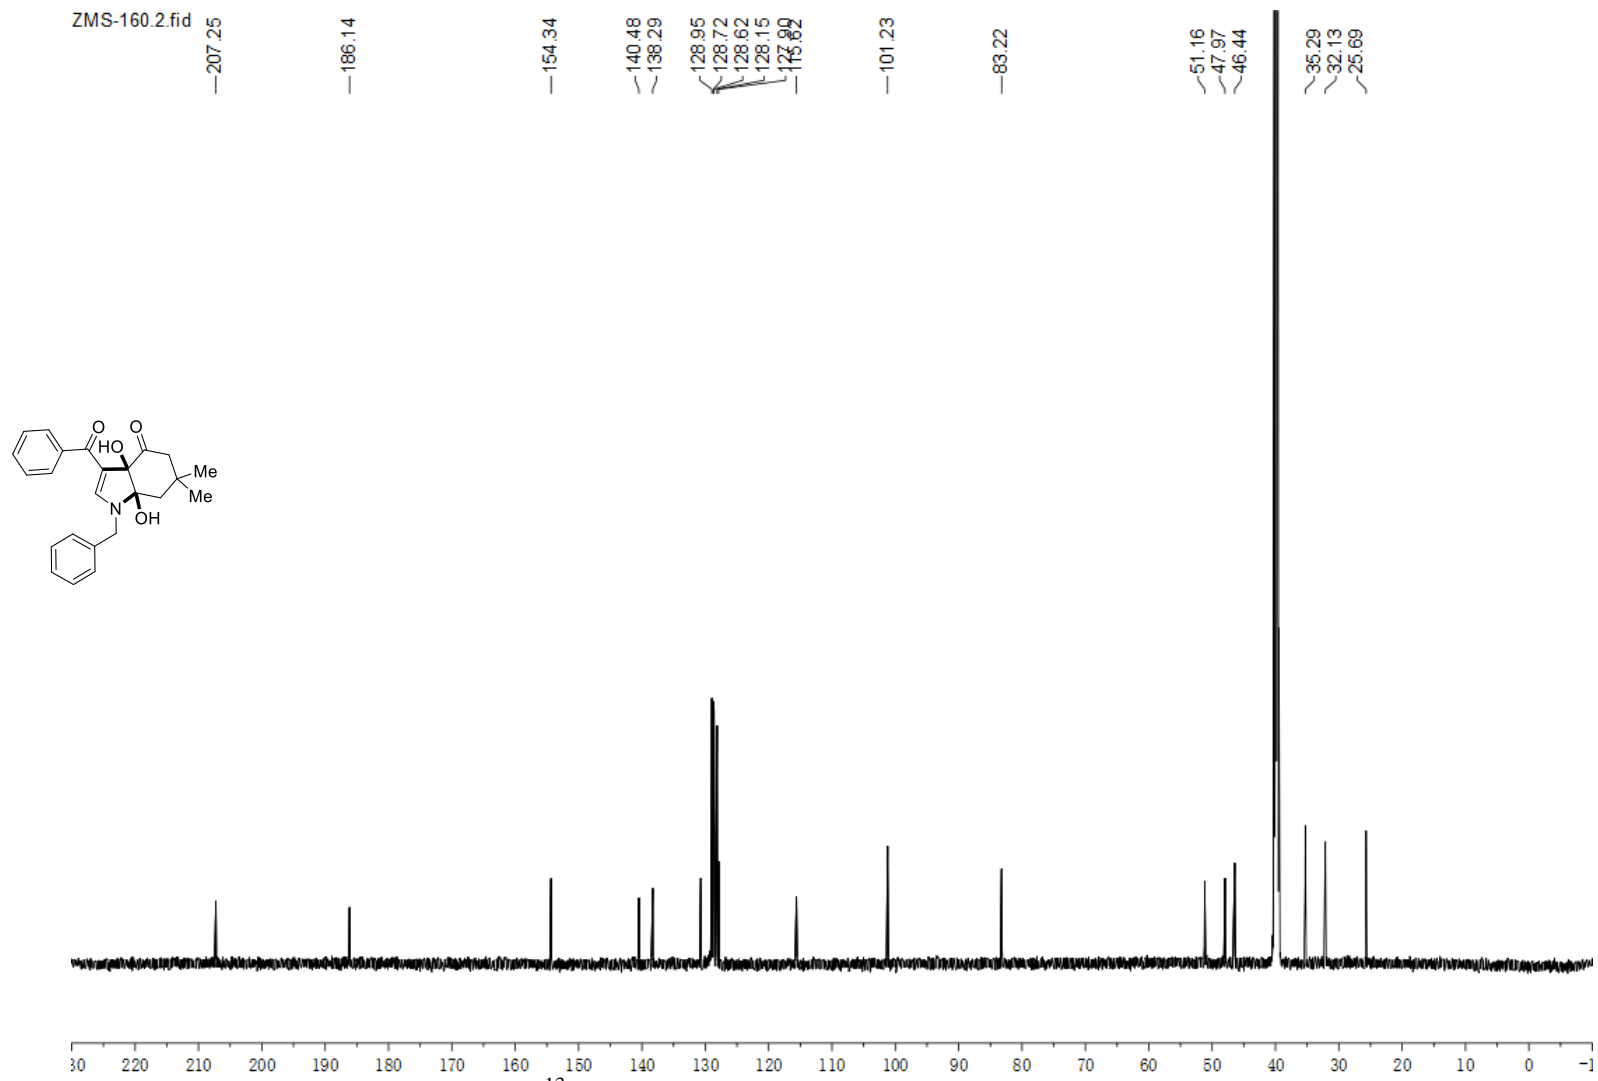

Figure S61.  $^{13}\text{C}$  NMR (150 MHz,  $\text{DMSO}-d_6$ ) spectra of compound **3d'**

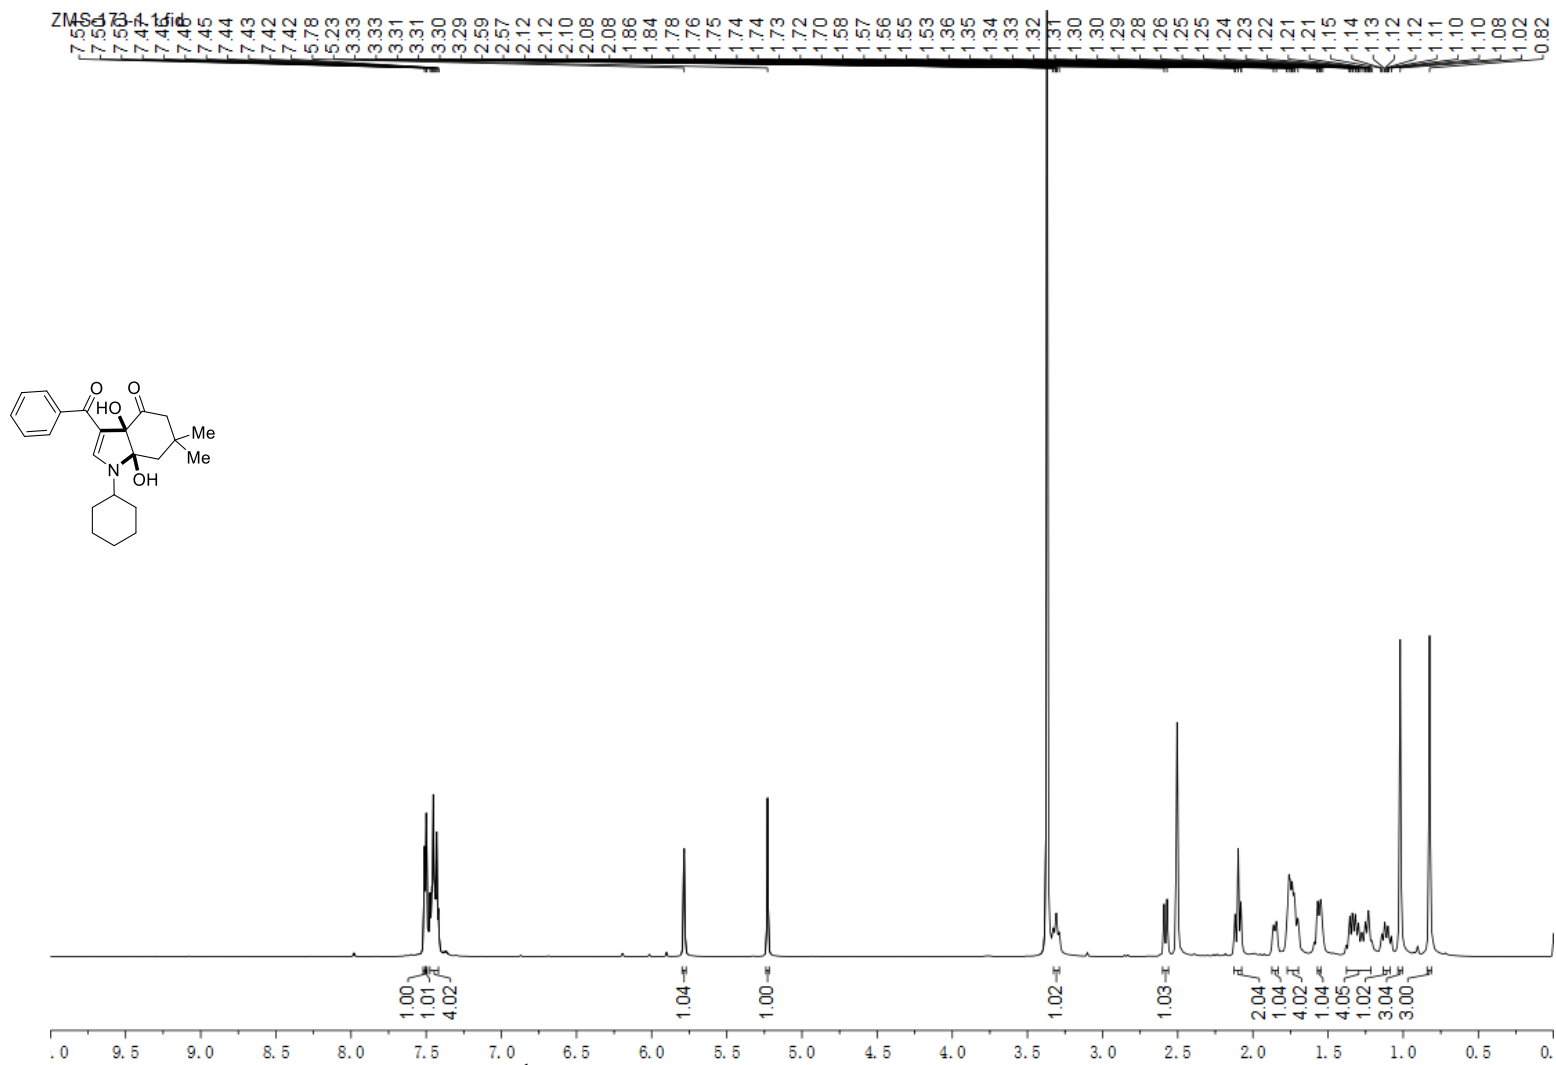

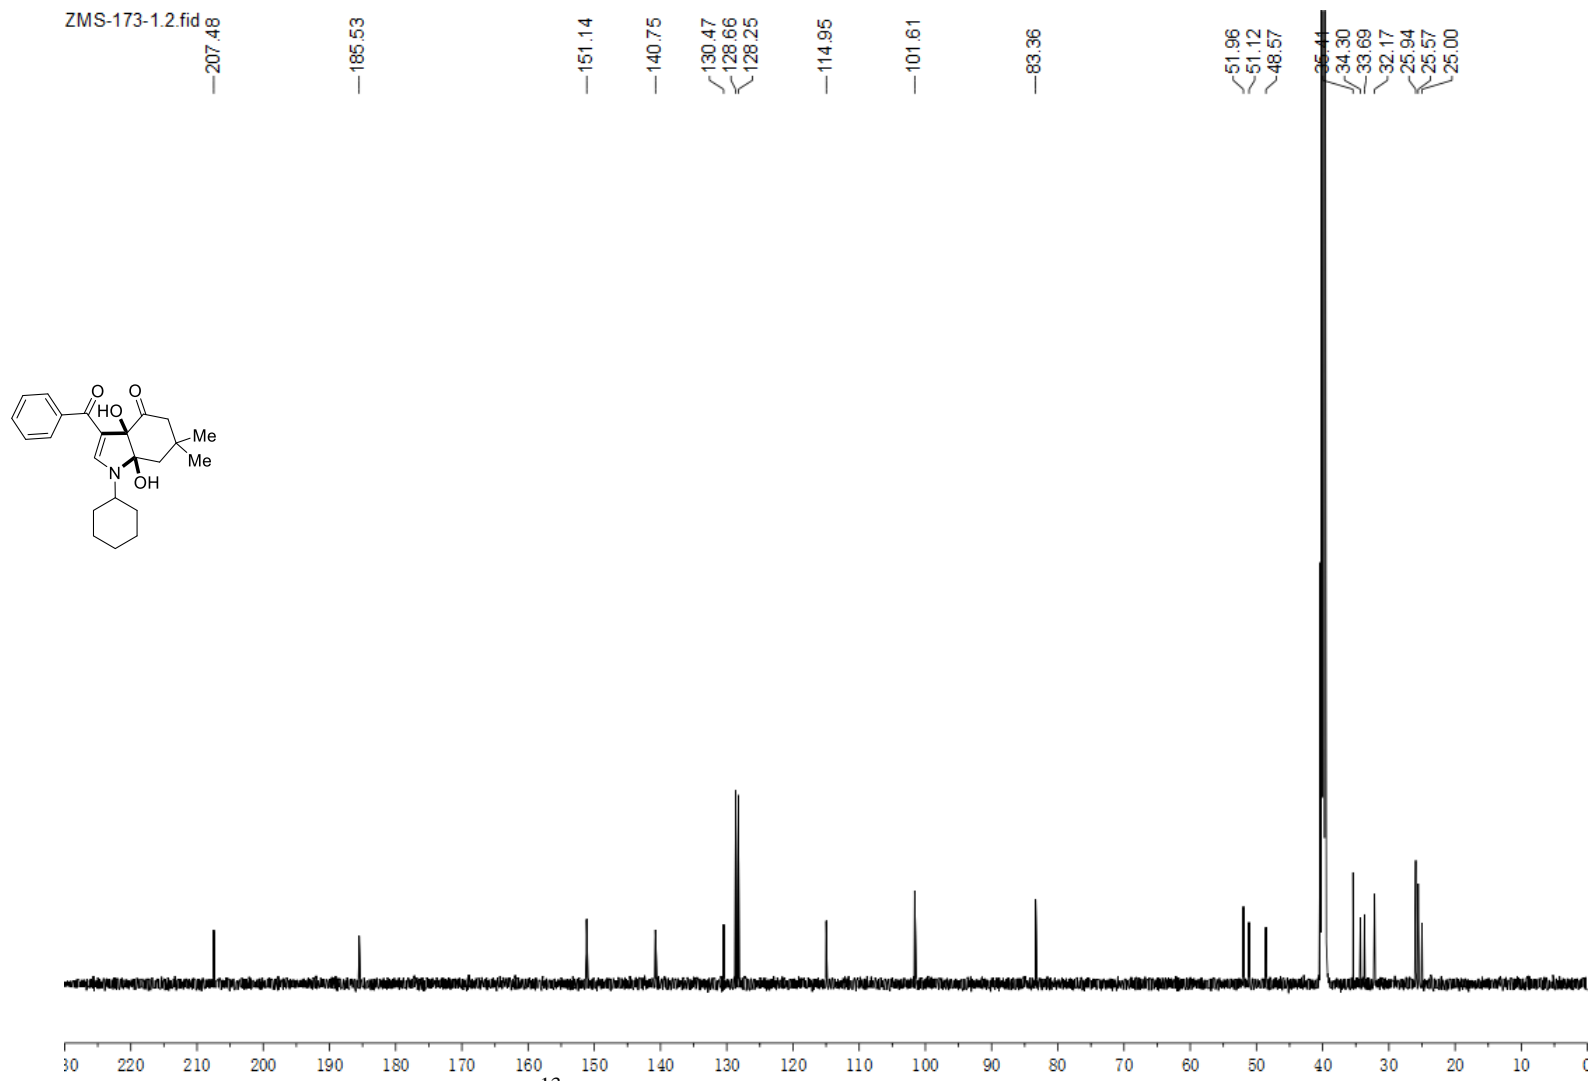

Figure S63.  $^{13}\text{C}$  NMR (150 MHz,  $\text{DMSO-}d_6$ ) spectra of compound **3e'**



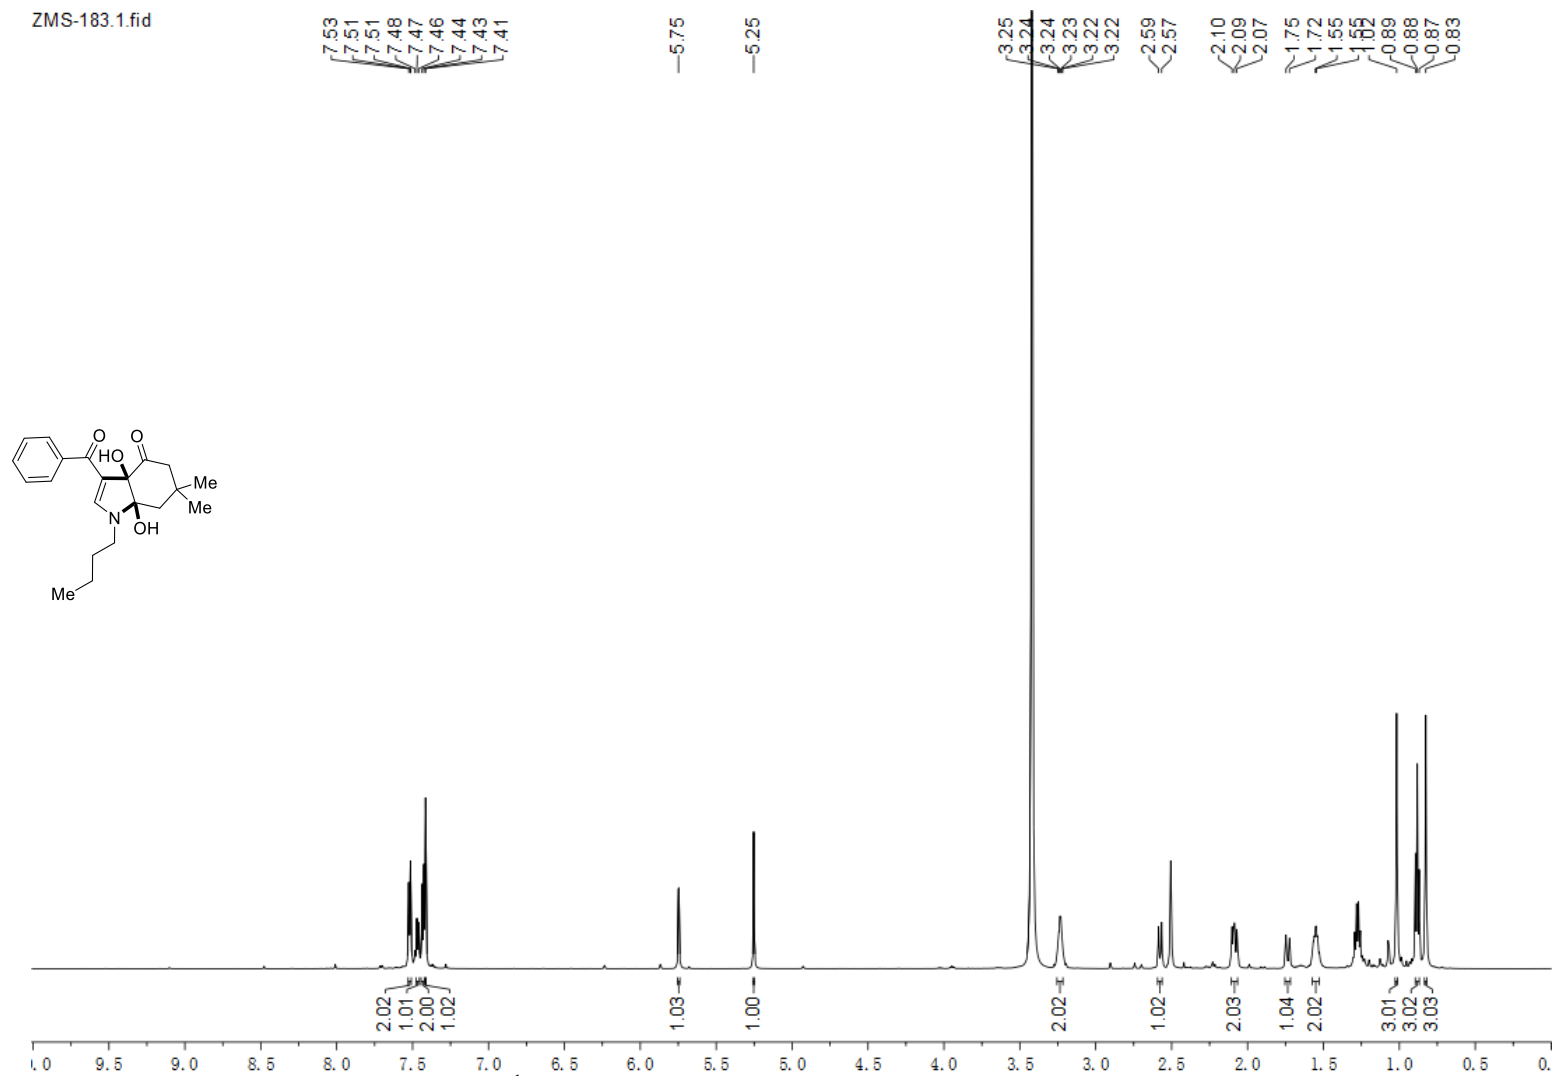

**Figure S64.** <sup>1</sup>H NMR (600 MHz, DMSO-*d*<sub>6</sub>) spectra of compound **3f**

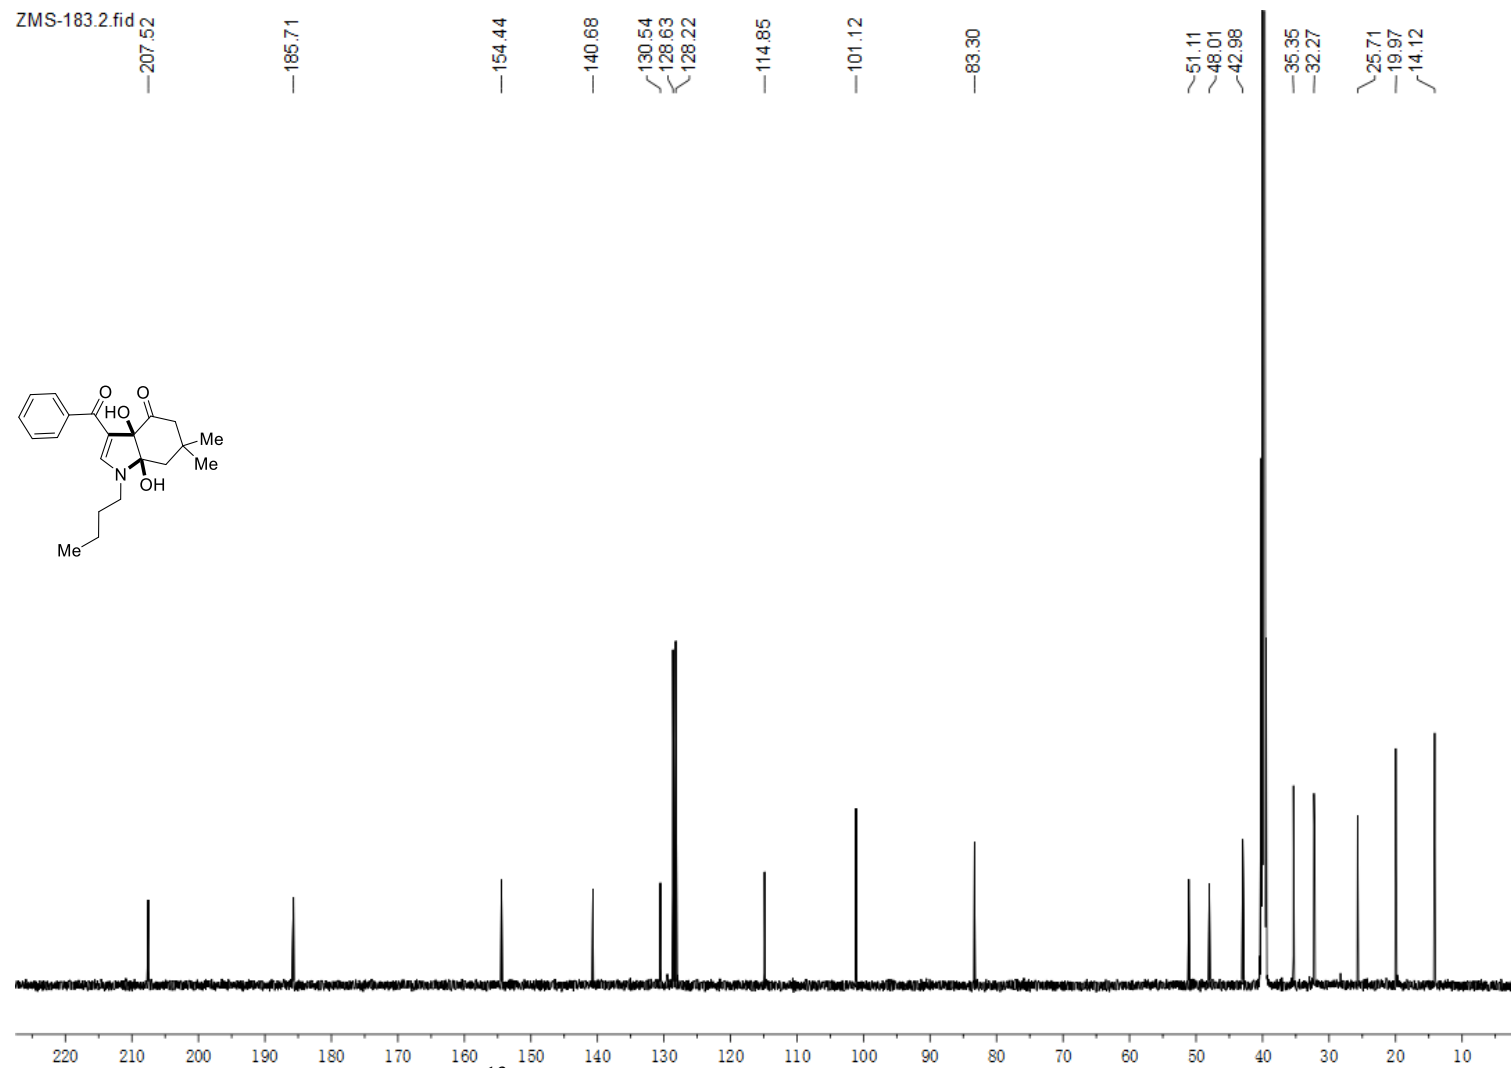

Figure S65.  $^{13}\text{C}$  NMR (150 MHz,  $\text{DMSO-}d_6$ ) spectra of compound 3f'

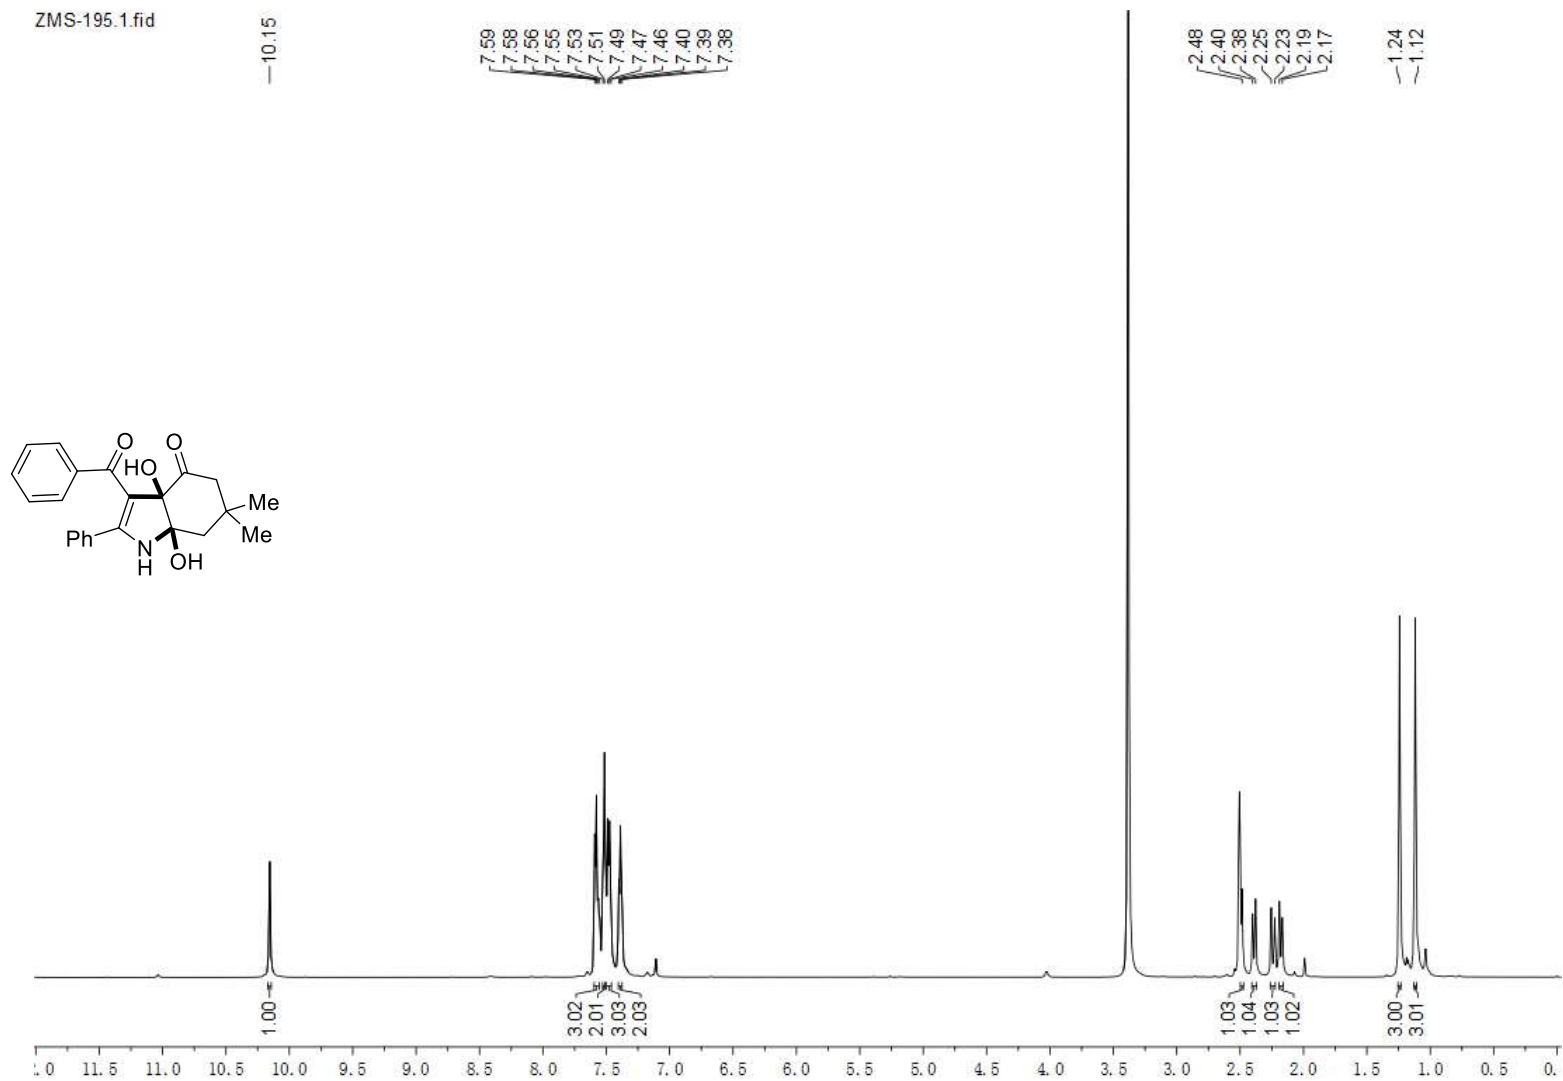

**Figure S66.**  $^1\text{H}$  NMR (600 MHz,  $\text{DMSO-}d_6$ ) spectra of compound **3g'**

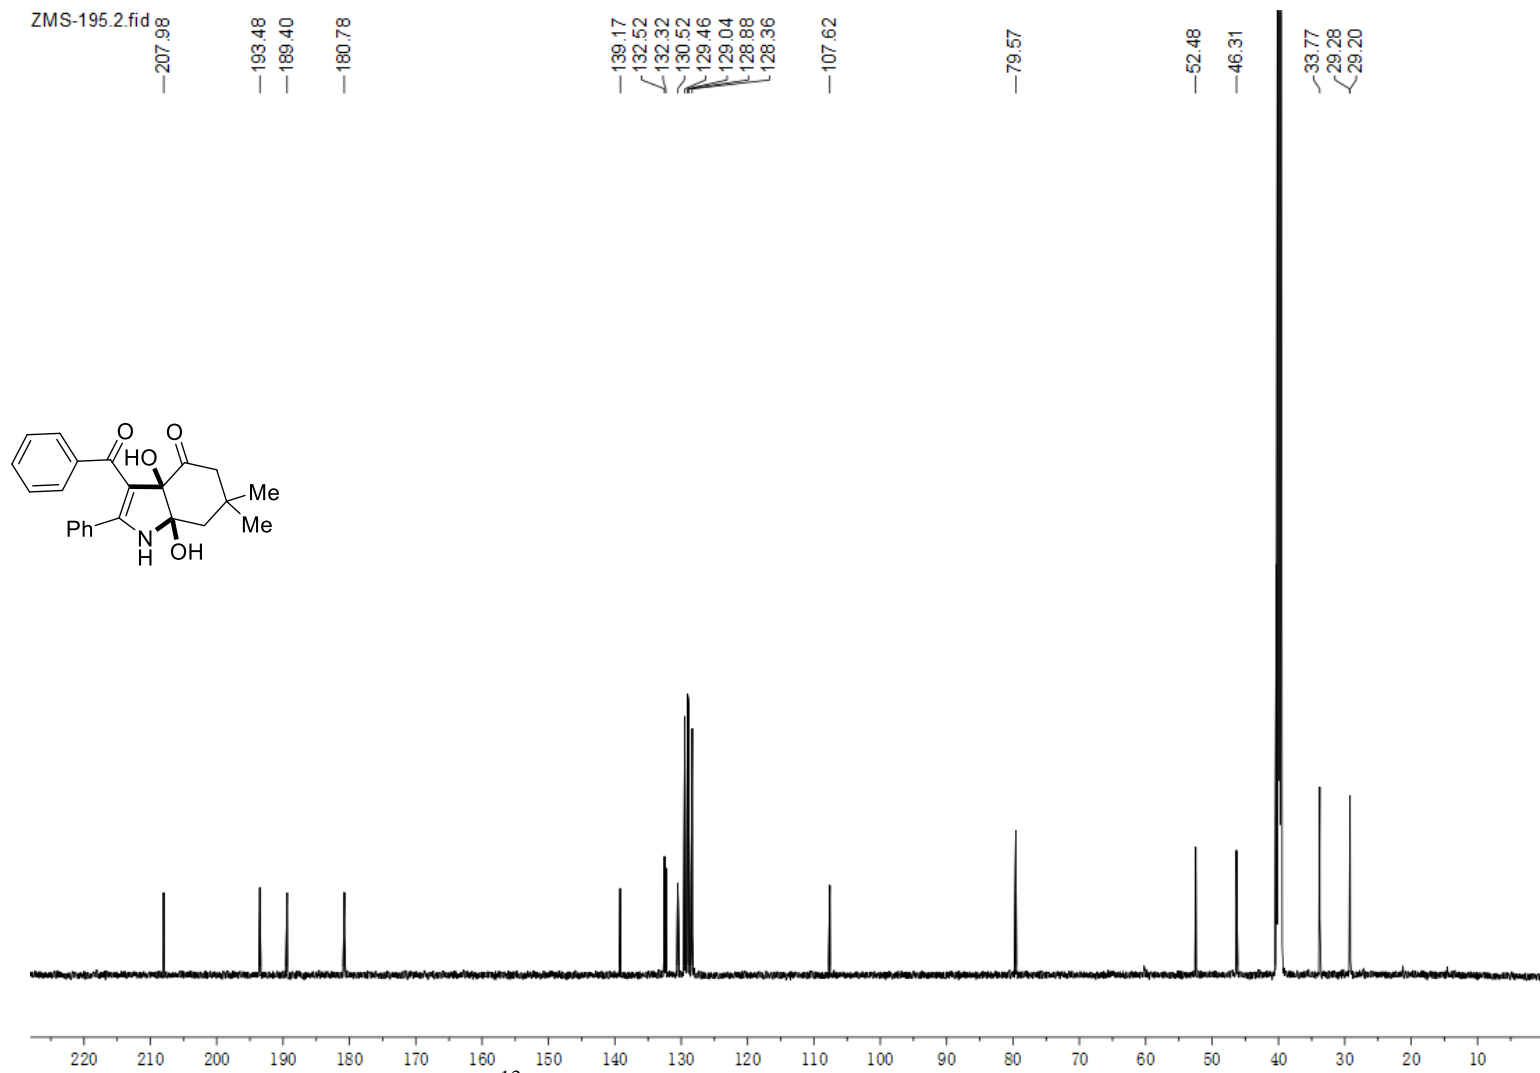

**Figure S67.**  $^{13}\text{C}$  NMR (150 MHz,  $\text{DMSO-}d_6$ ) spectra of compound **3g'**

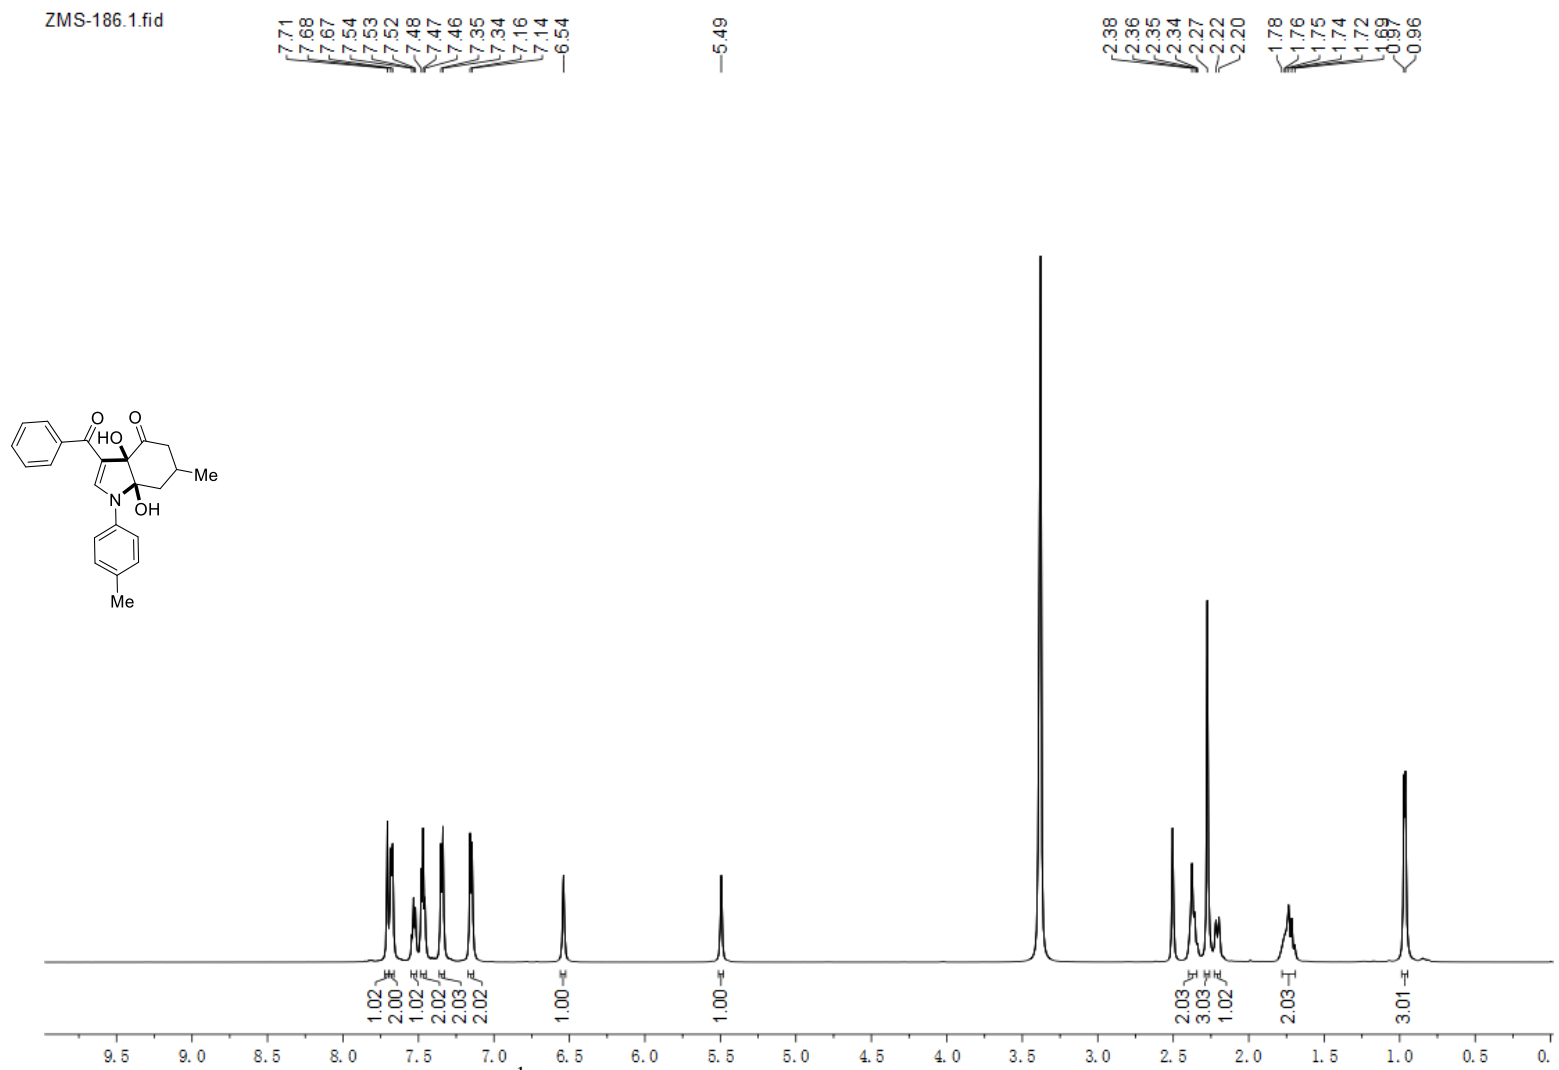

**Figure S68.**  $^1\text{H}$  NMR (600 MHz,  $\text{DMSO-}d_6$ ) spectra of compound **3h'**

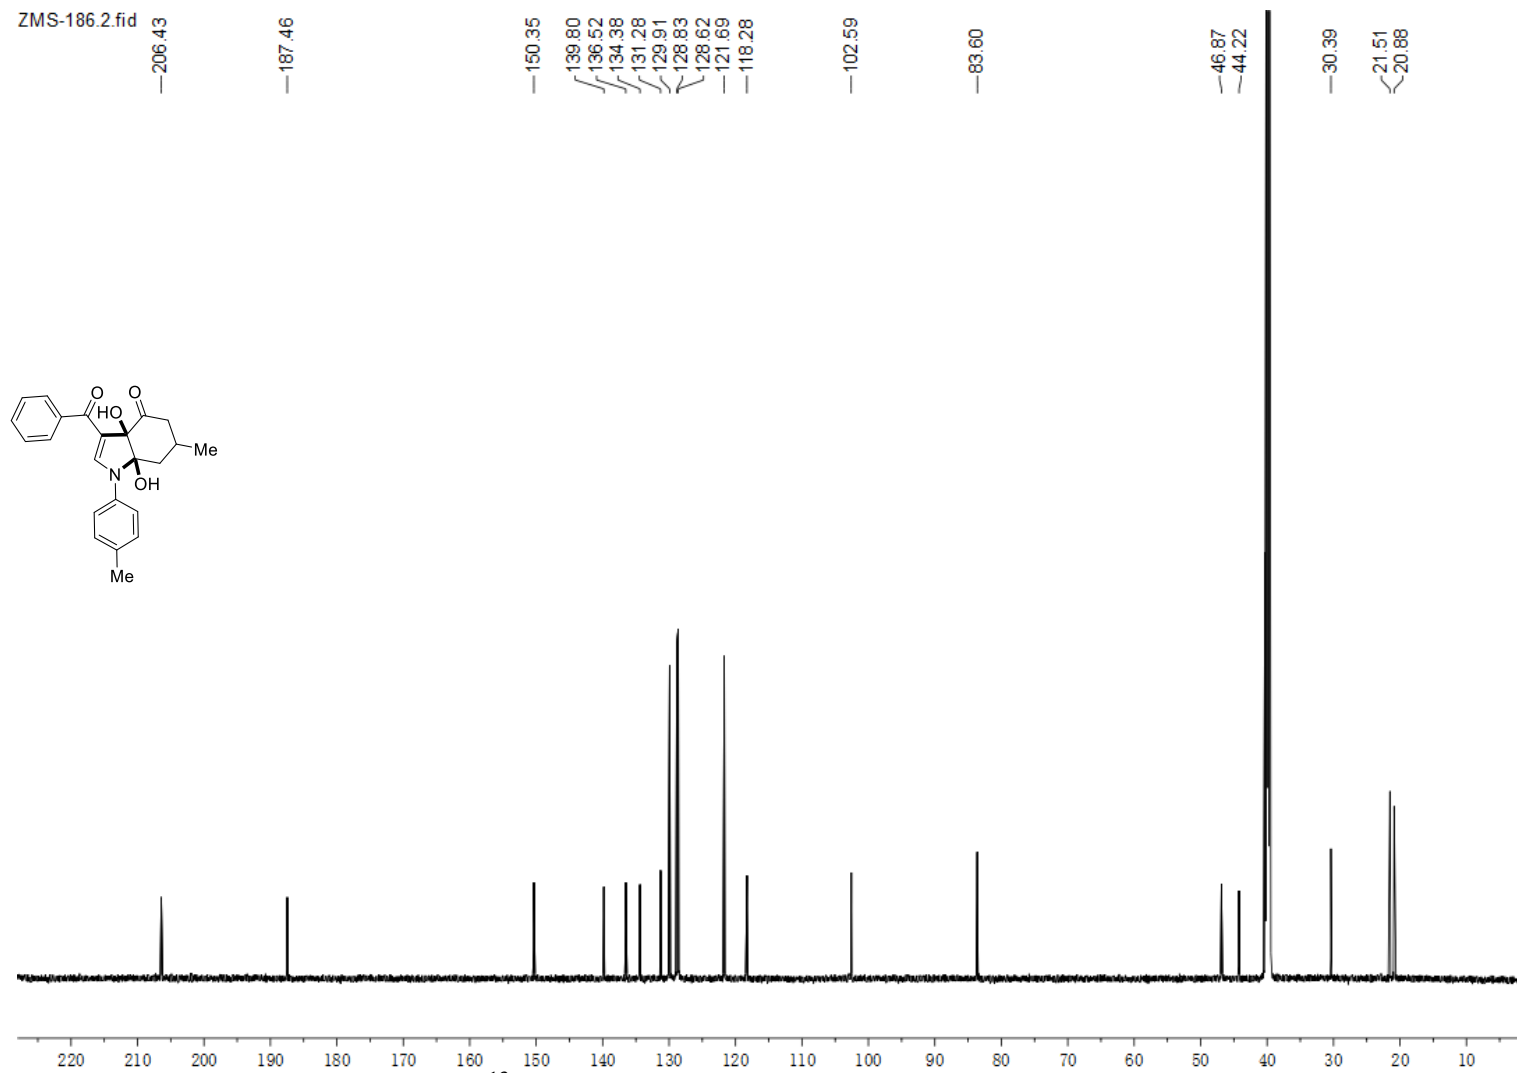

**Figure S69.**  $^{13}\text{C}$  NMR (150 MHz,  $\text{DMSO-}d_6$ ) spectra of compound **3h'**

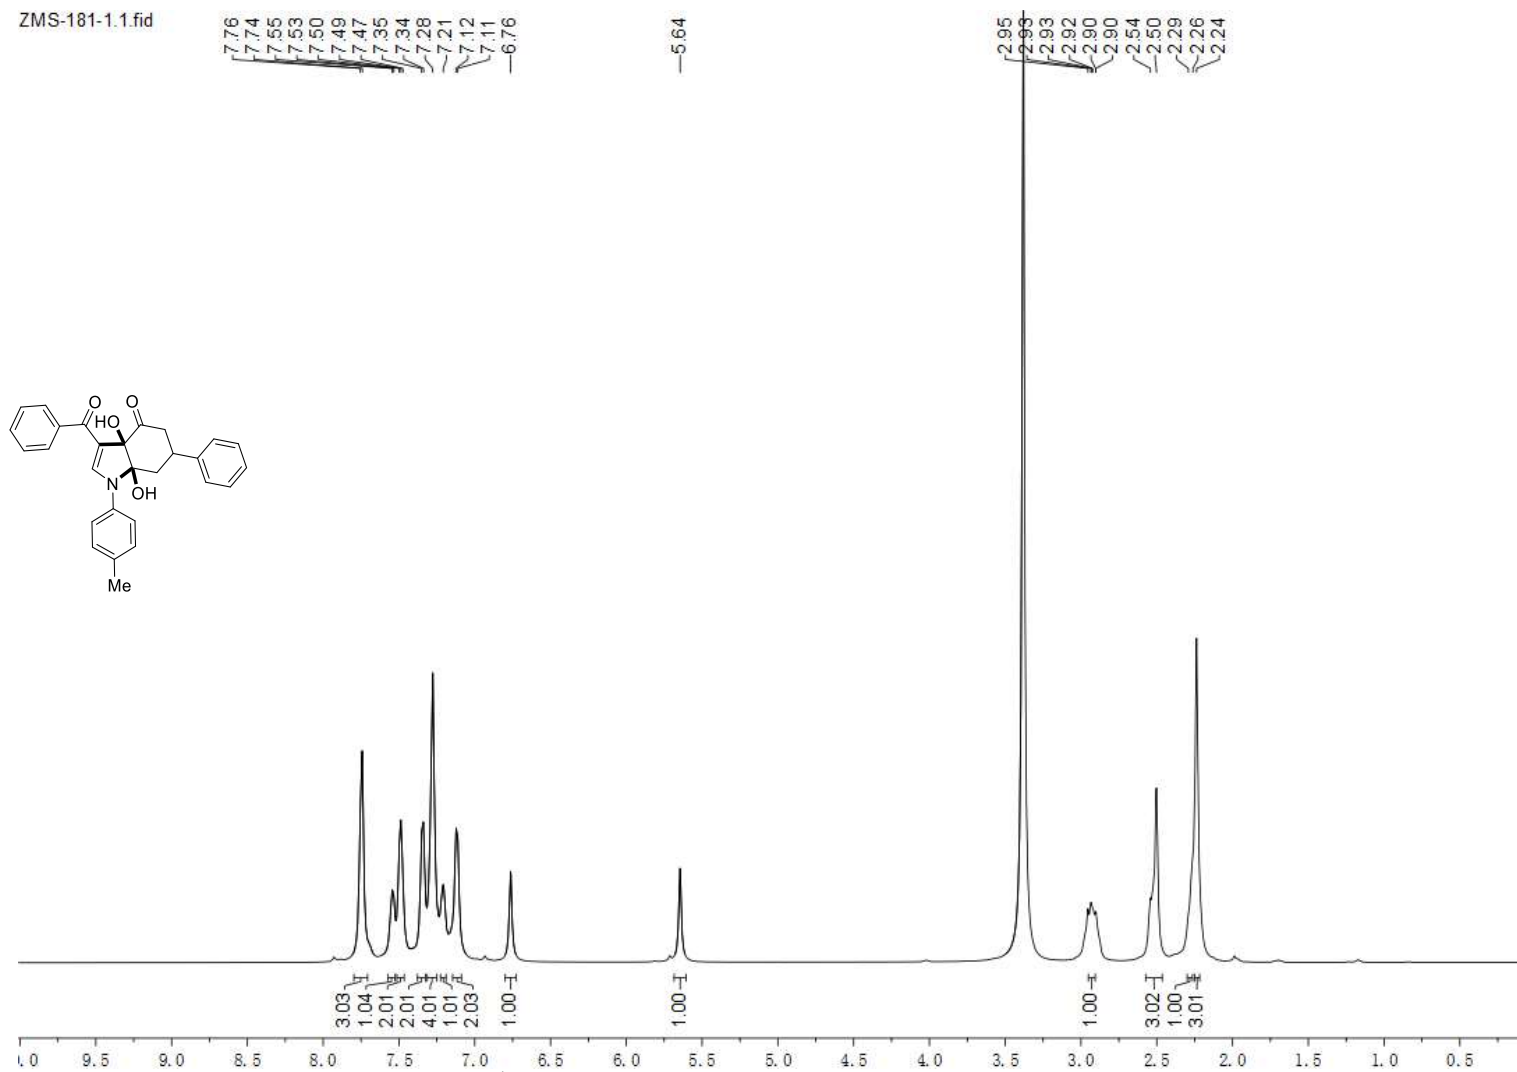

**Figure S70.**  $^1\text{H}$  NMR (600 MHz,  $\text{DMSO-}d_6$ ) spectra of compound **3i'**

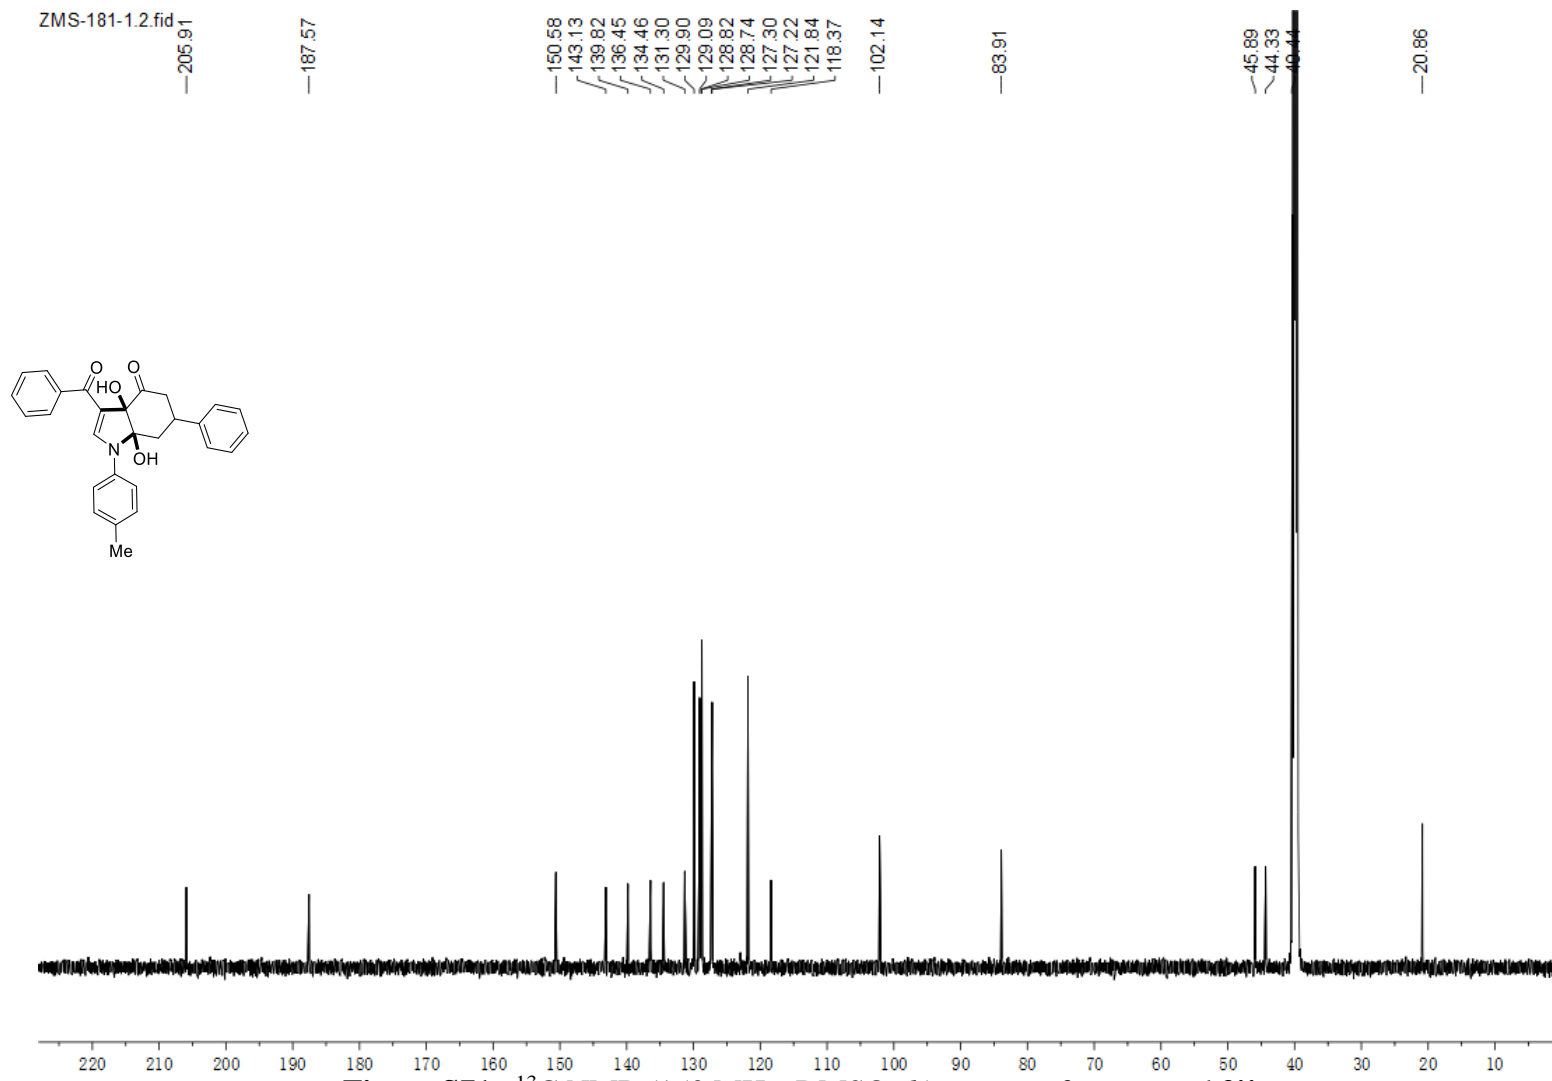



ZMS-188-13.fid

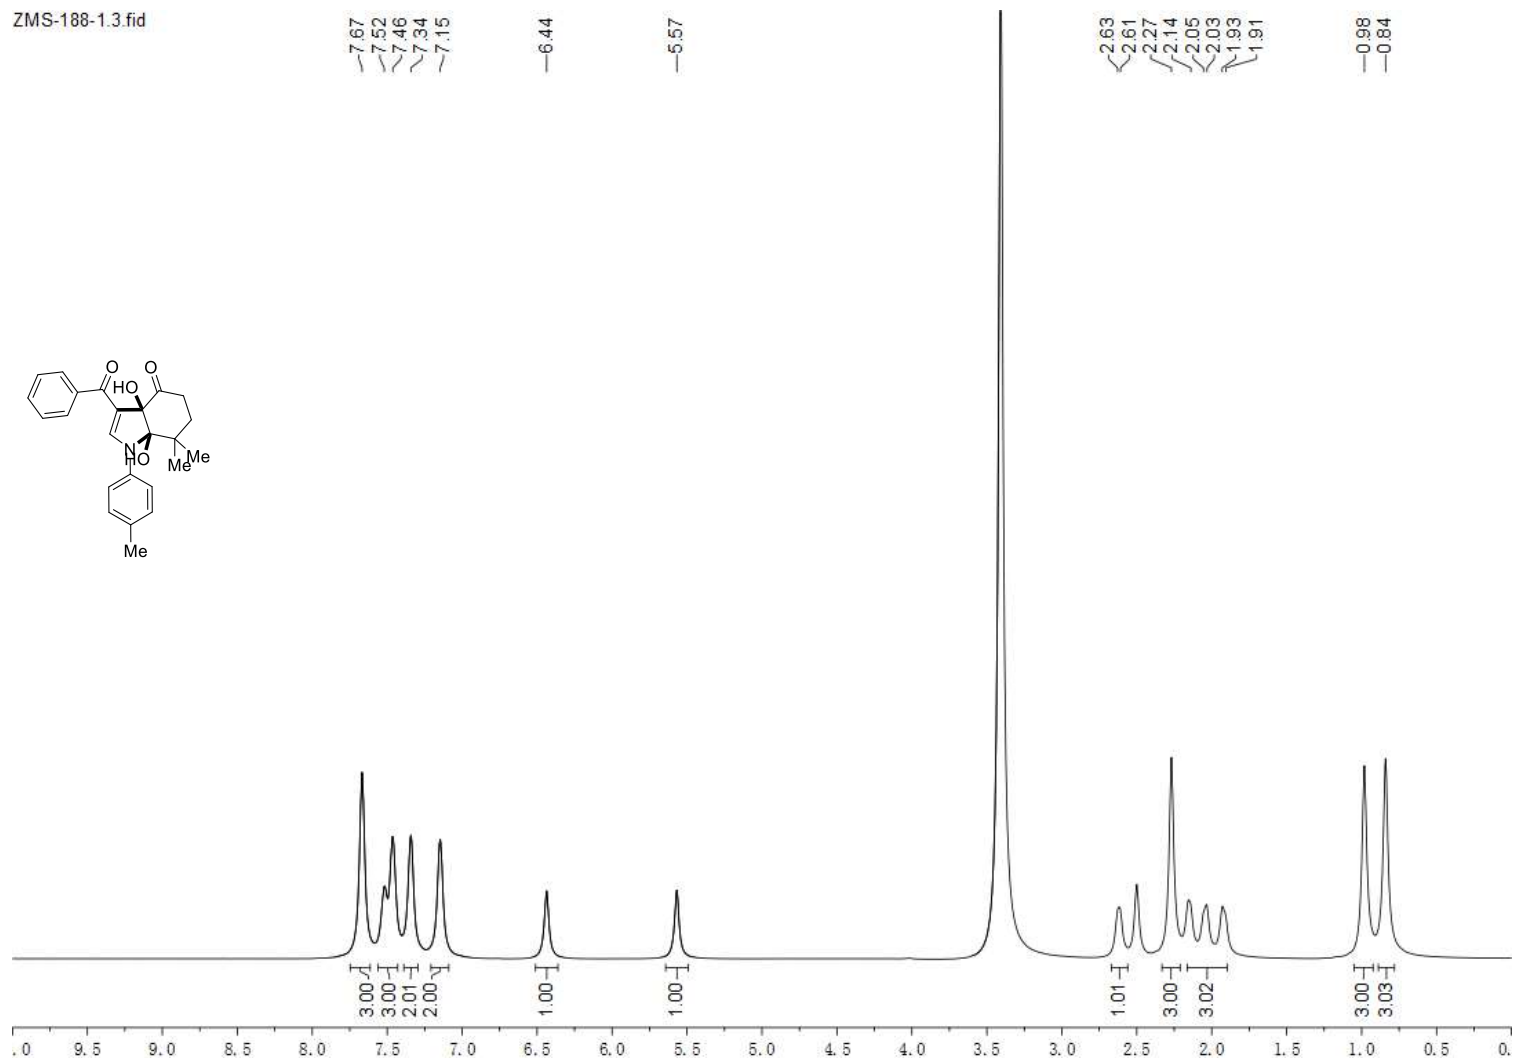

Figure S72.  $^1\text{H}$  NMR (600 MHz,  $\text{DMSO-}d_6$ ) spectra of compound 3j'

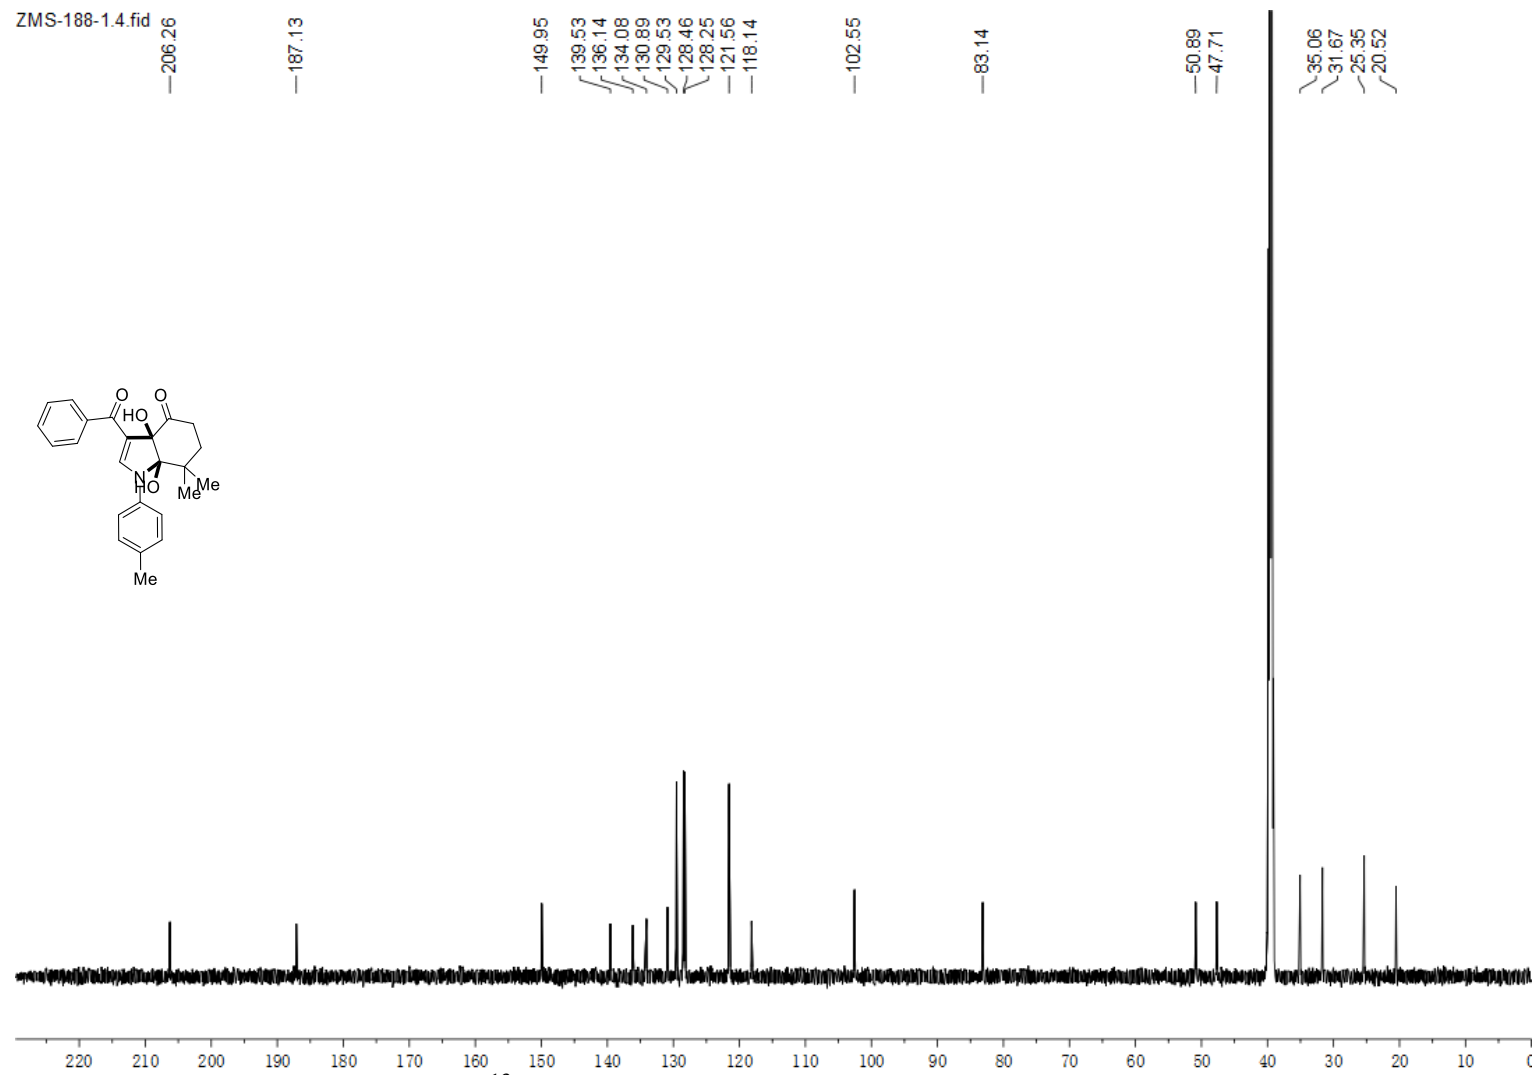

**Figure S73.**  $^{13}\text{C}$  NMR (150 MHz,  $\text{DMSO-}d_6$ ) spectra of compound **3j'**

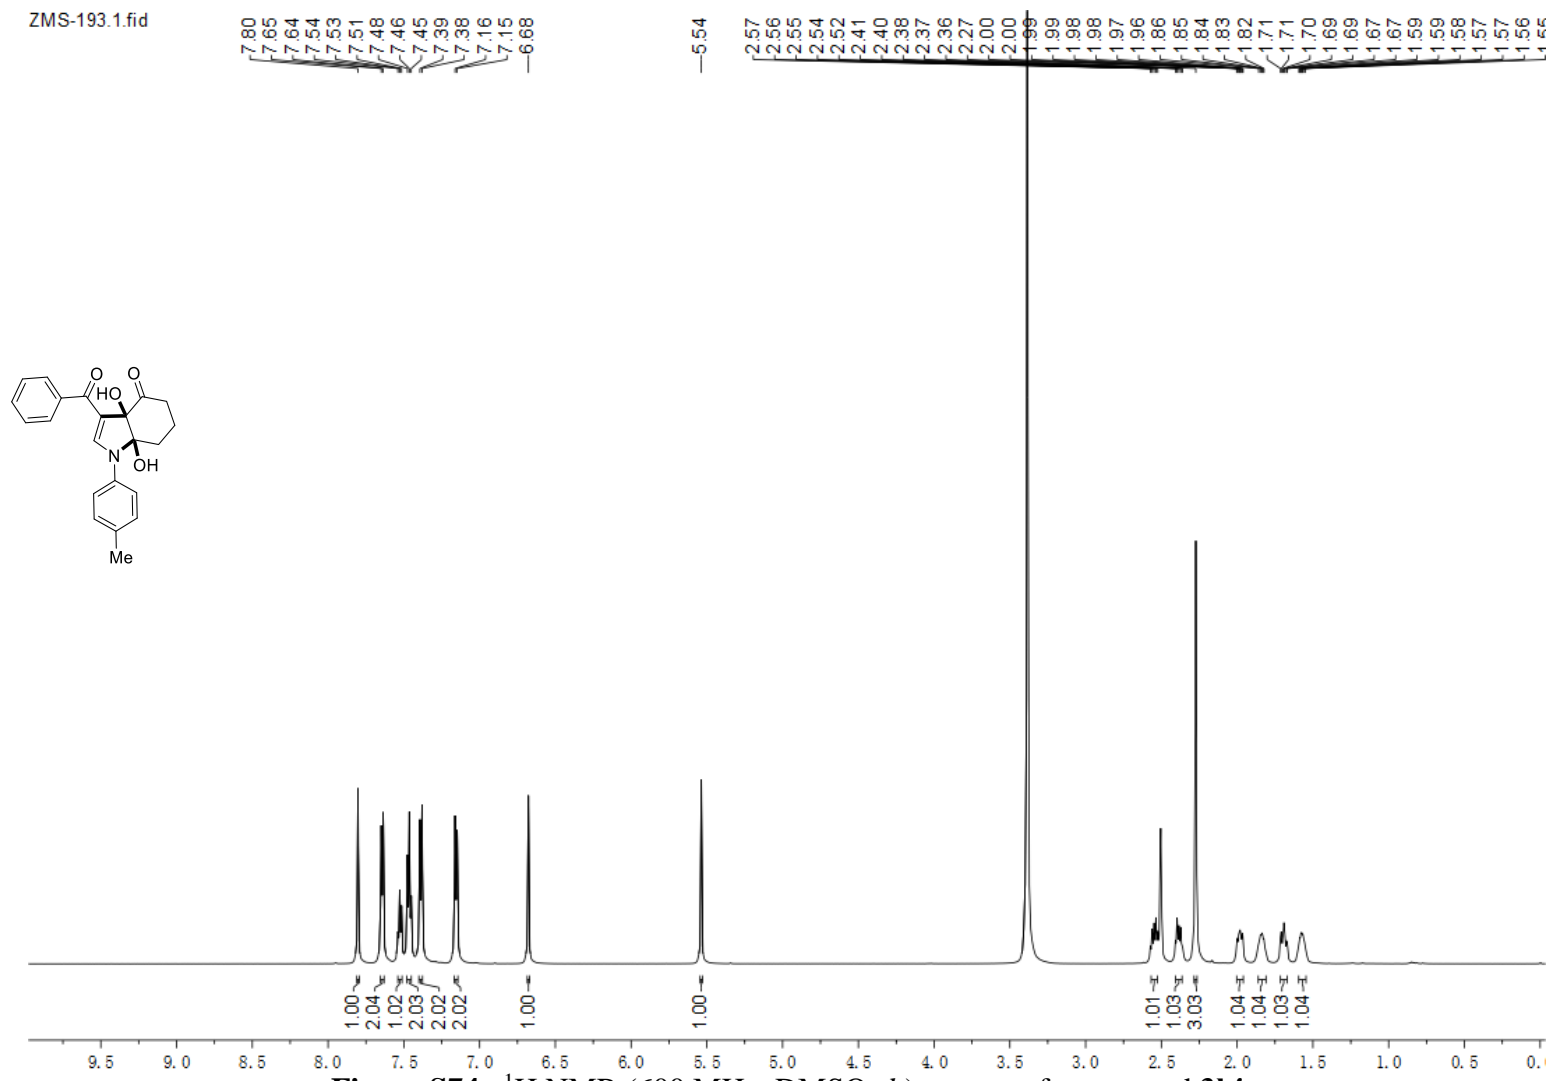

Figure S74. <sup>1</sup>H NMR (600 MHz, DMSO-*d*<sub>6</sub>) spectra of compound 3k'

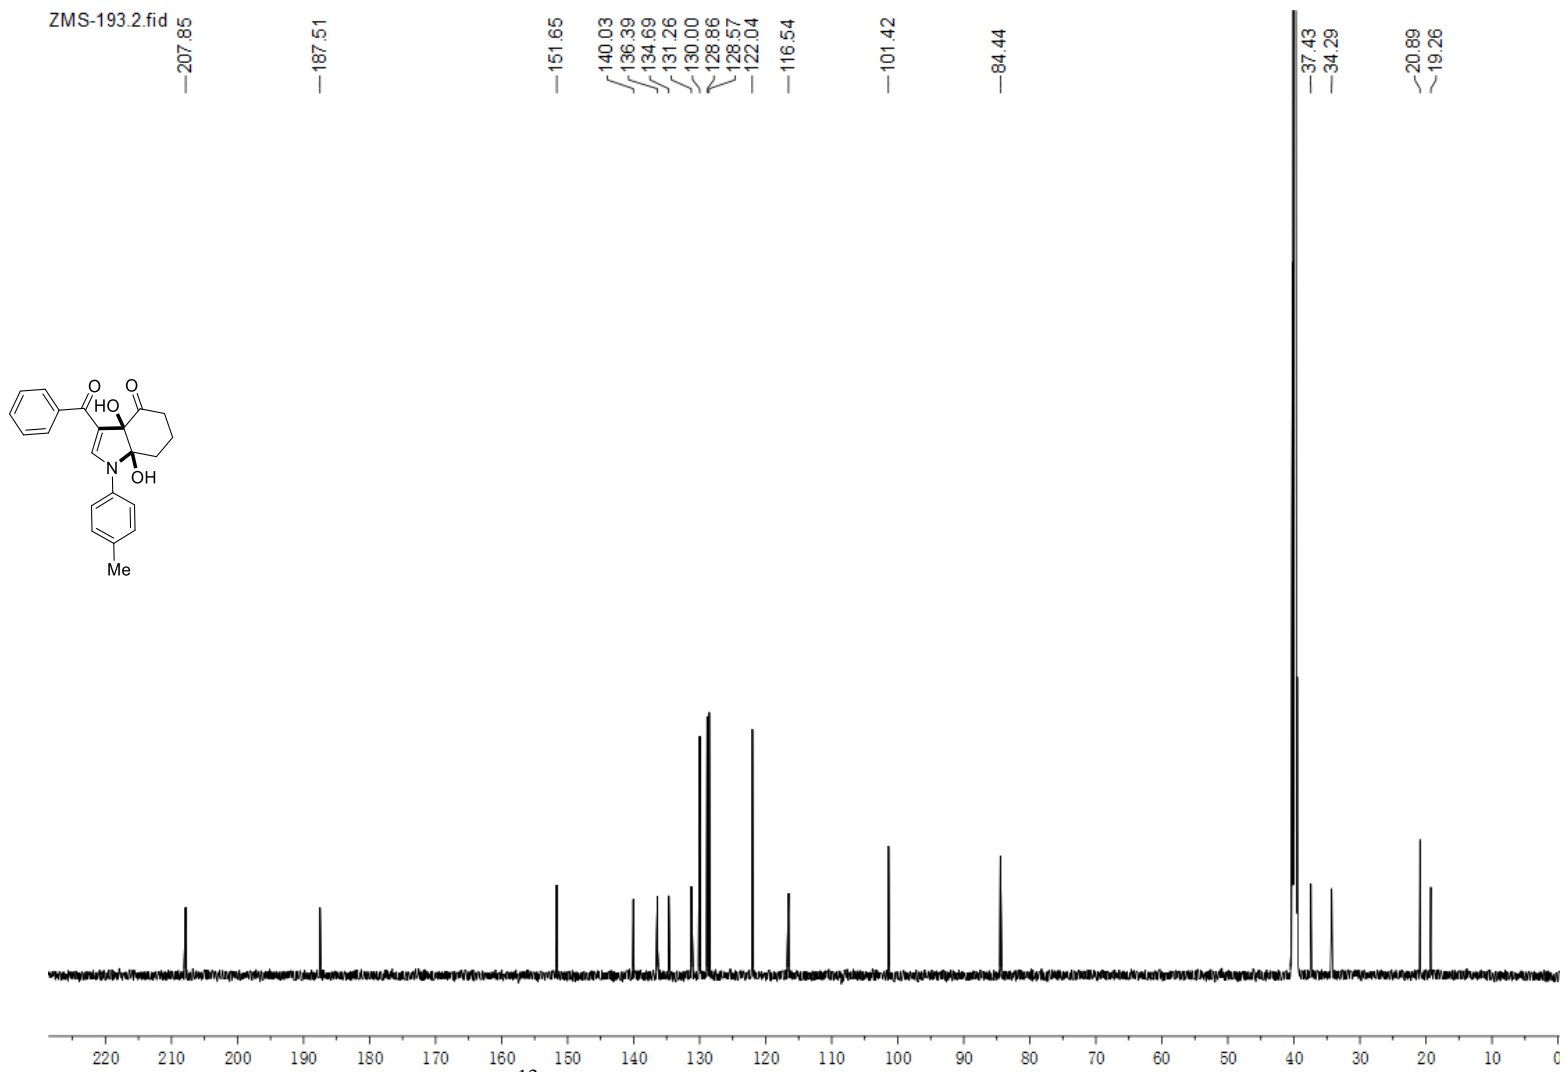

Figure S75.  $^{13}\text{C}$  NMR (150 MHz,  $\text{DMSO-}d_6$ ) spectra of compound 3k'

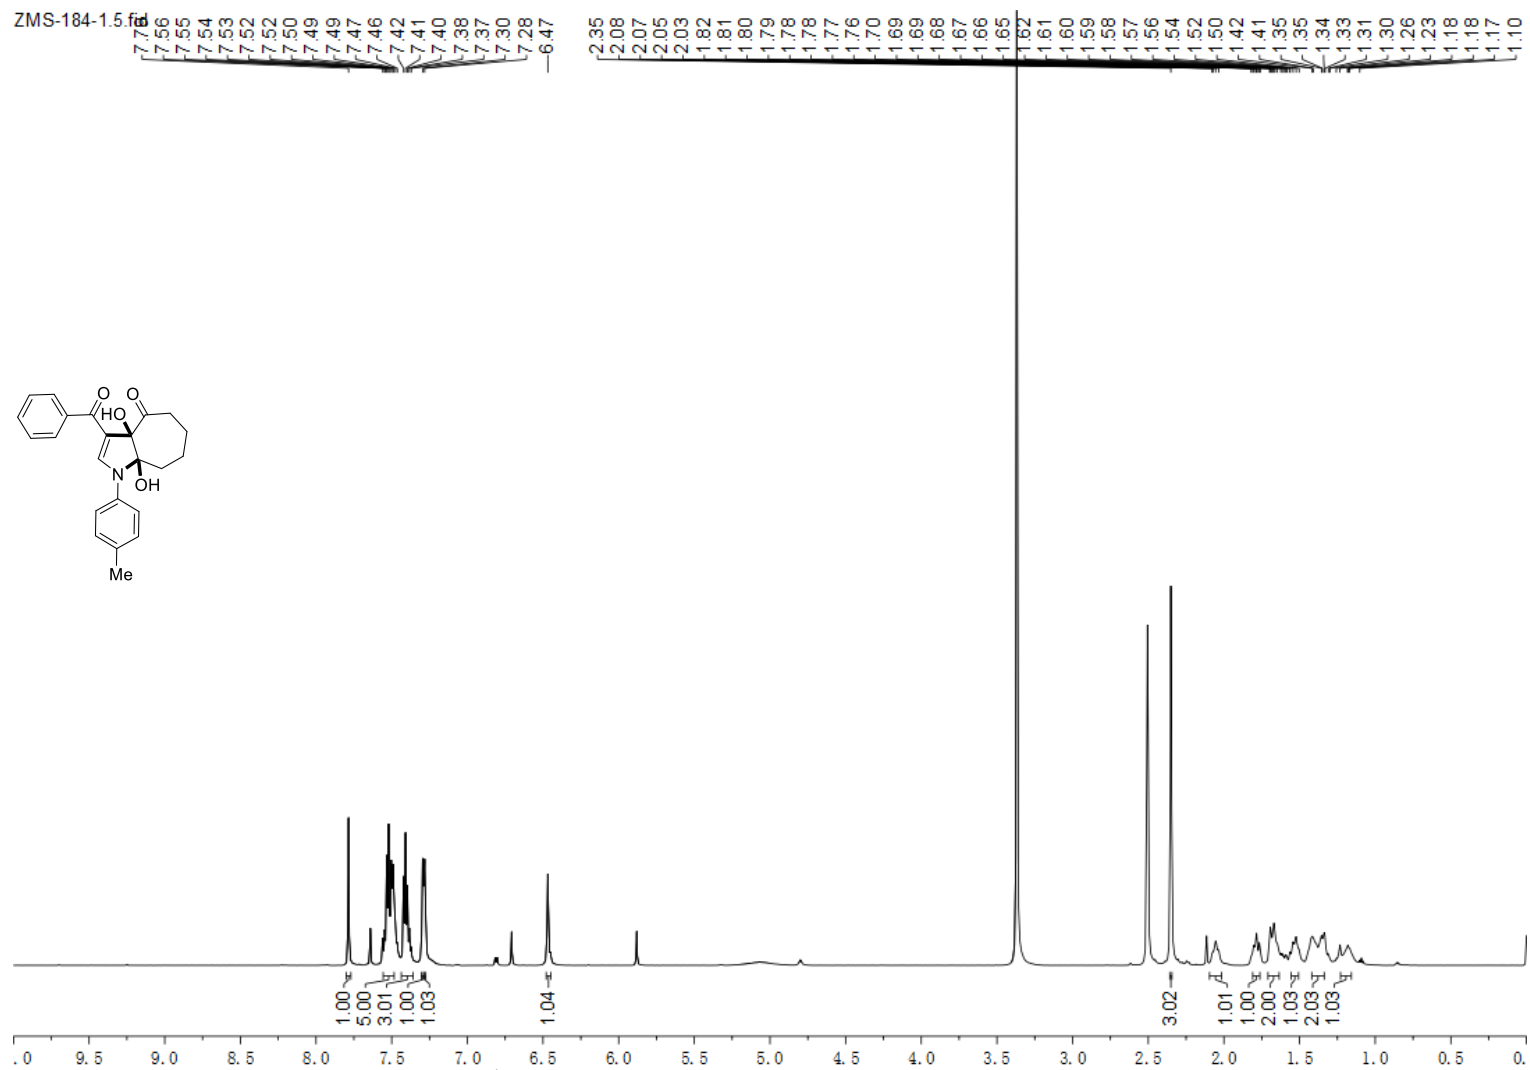

**Figure S76.**  $^1\text{H}$  NMR (600 MHz,  $\text{DMSO-}d_6$ ) spectra of compound 3I'

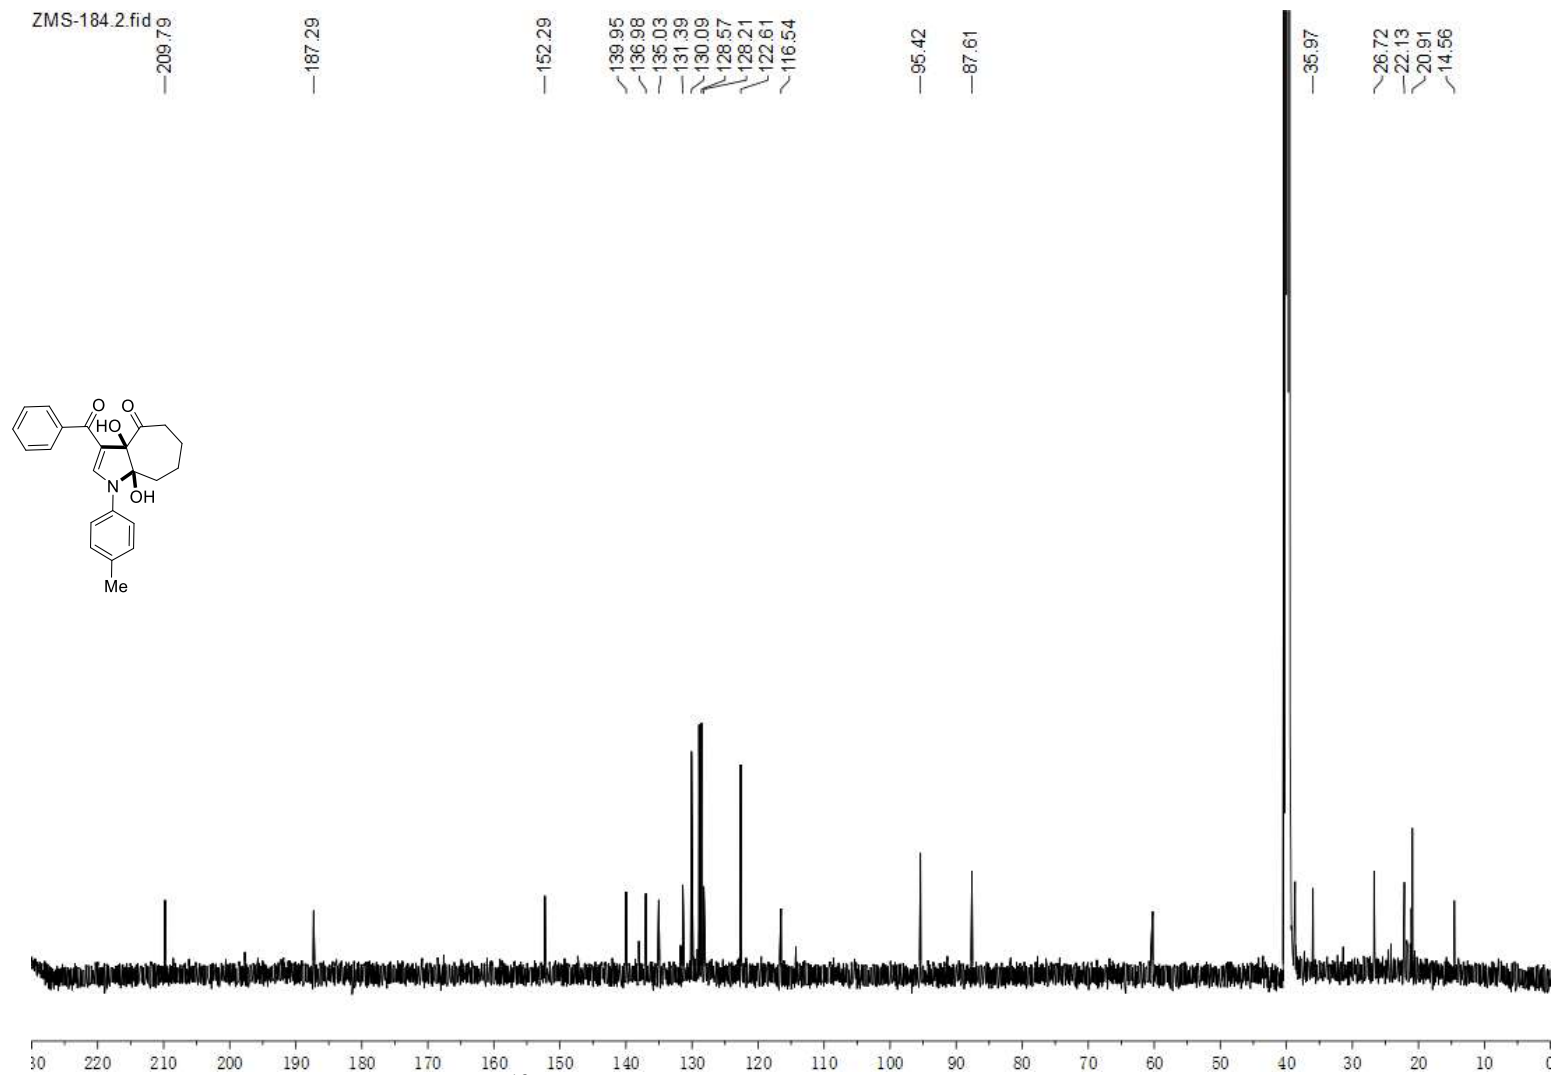

Figure S77.  $^{13}\text{C}$  NMR (150 MHz,  $\text{DMSO-}d_6$ ) spectra of compound **31'**

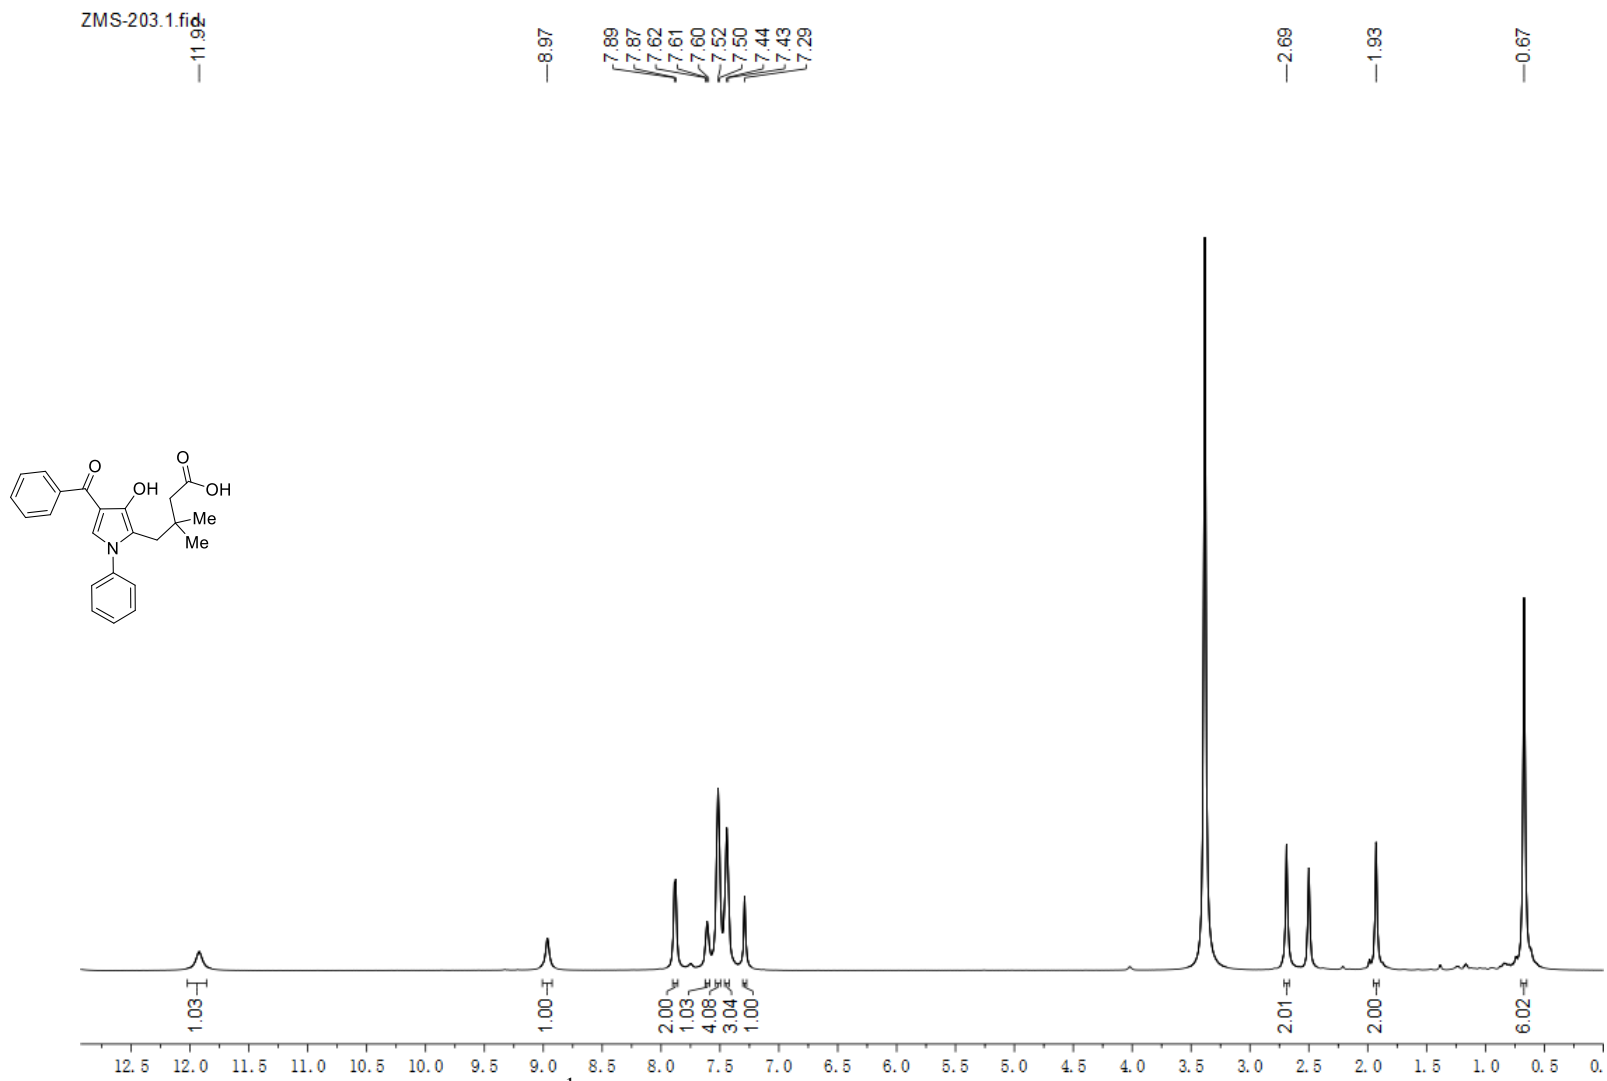

**Figure S78.**  $^1\text{H}$  NMR (600 MHz,  $\text{DMSO-}d_6$ ) spectra of compound **4a**

ZMS-203.2.fid

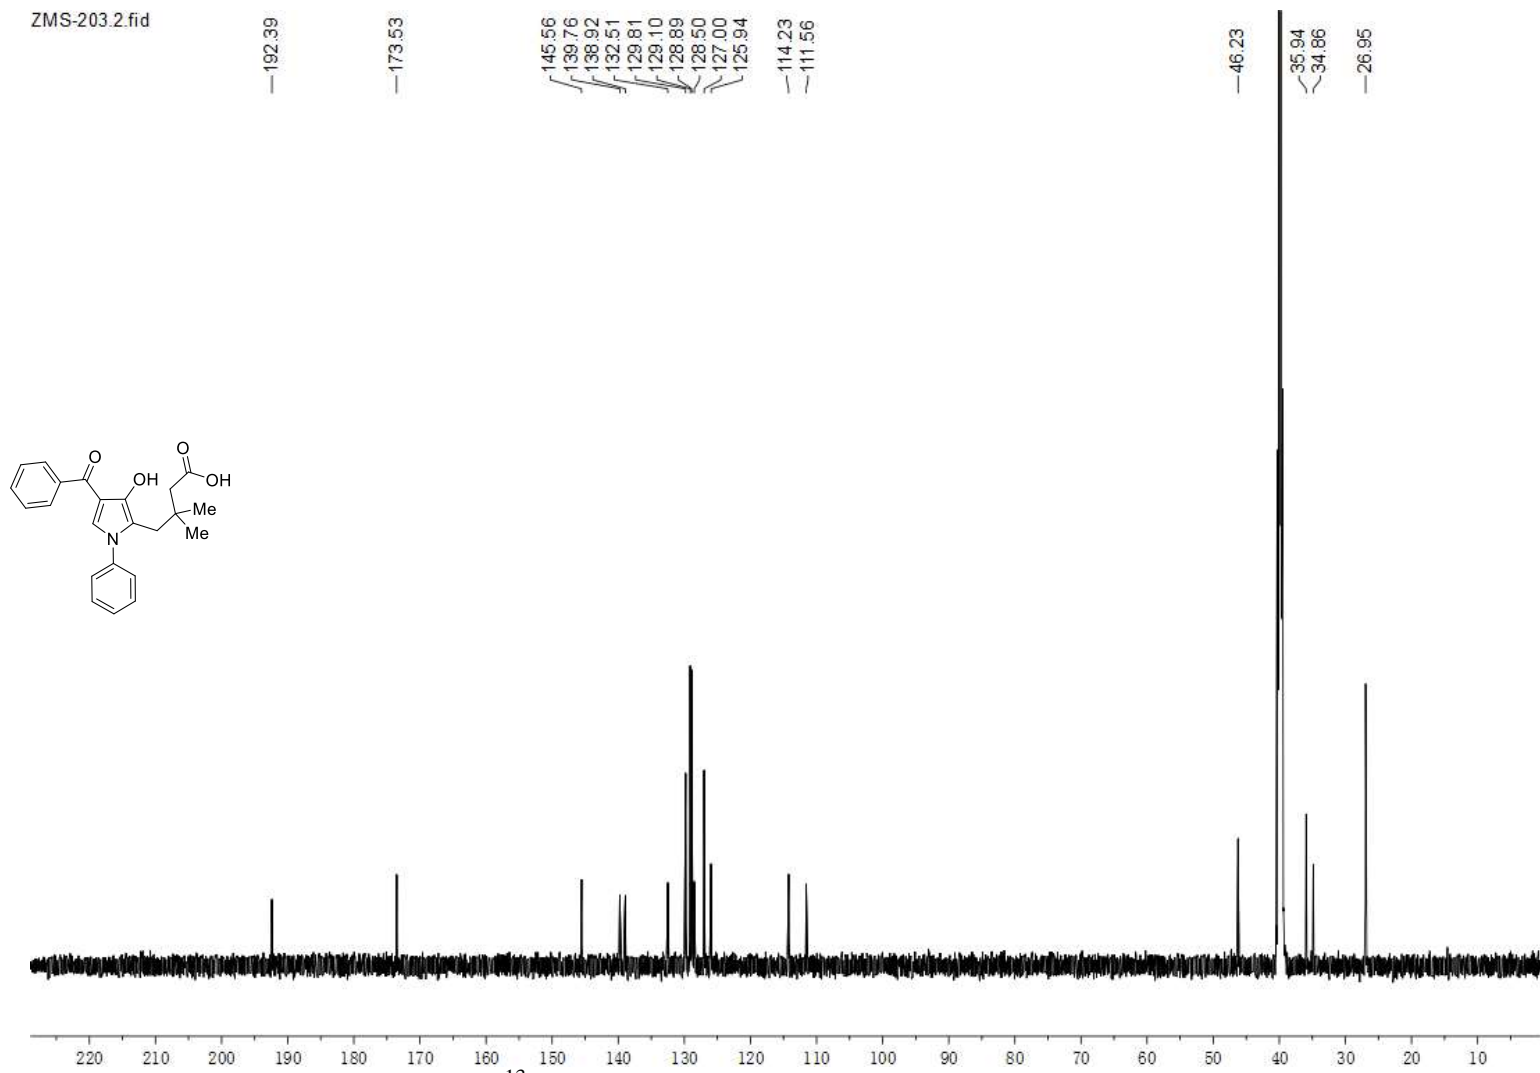

Figure S79. <sup>13</sup>C NMR (150 MHz, DMSO-*d*<sub>6</sub>) spectra of compound 4a



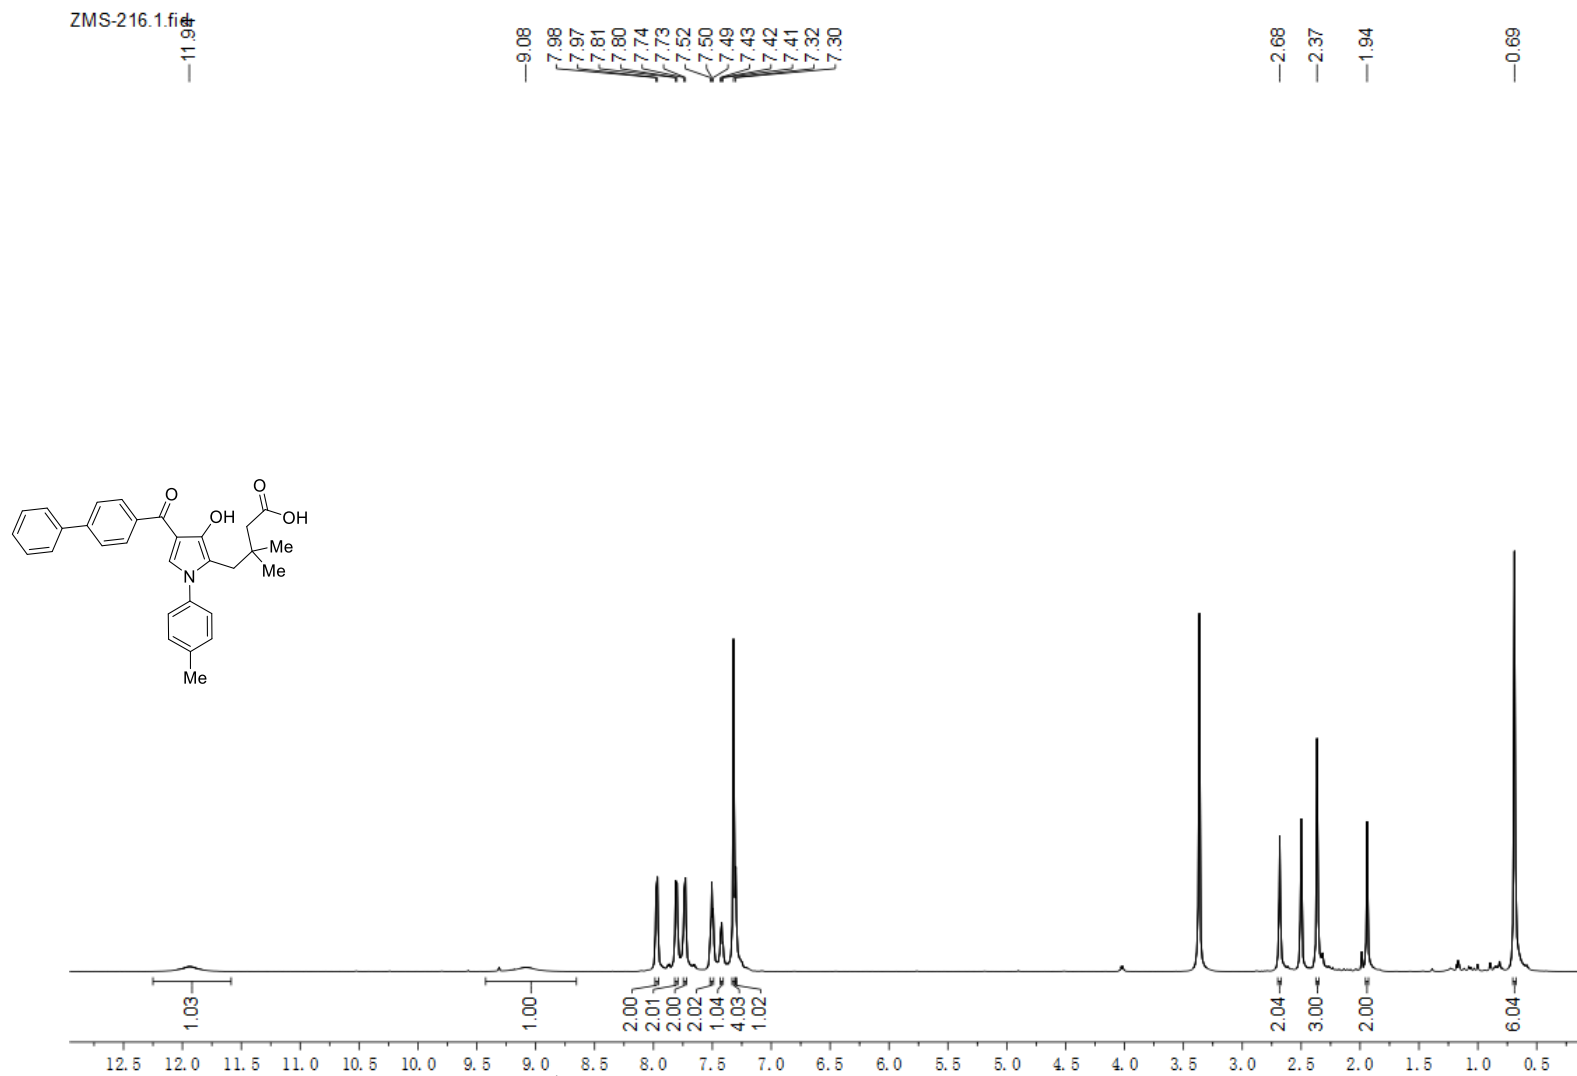

**Figure S80.**  $^1\text{H}$  NMR (600 MHz,  $\text{DMSO-}d_6$ ) spectra of compound **4b**

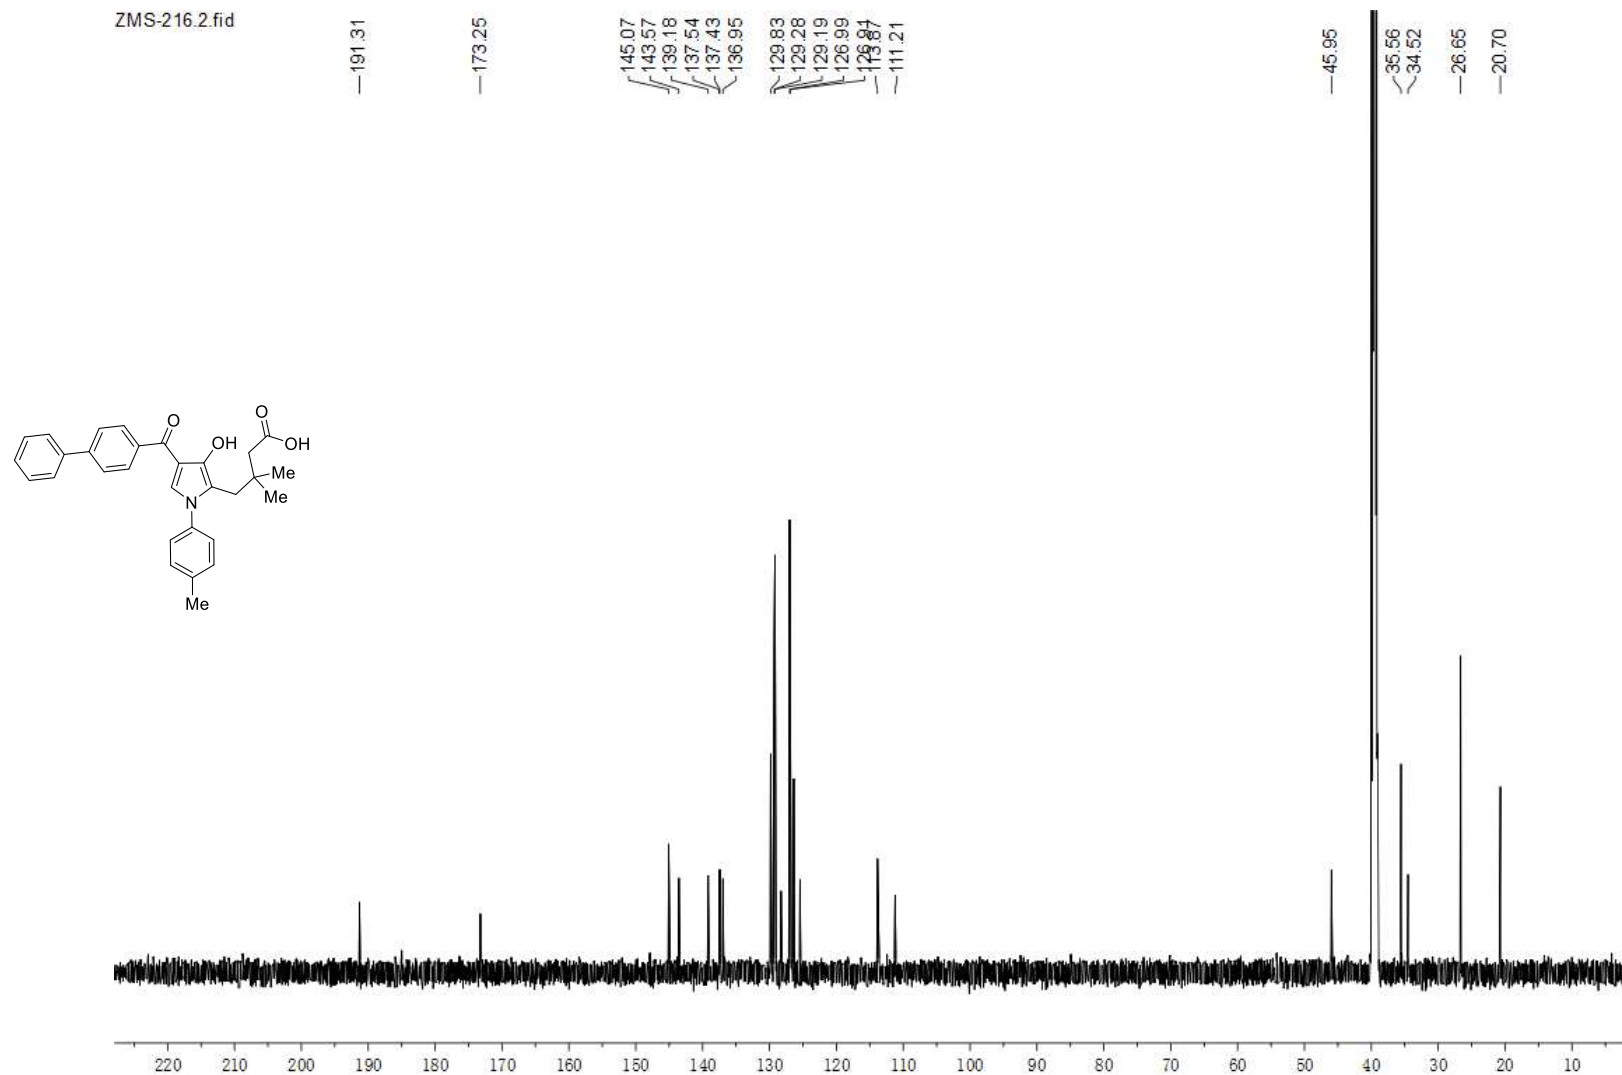

**Figure S81.**  $^{13}\text{C}$  NMR (150 MHz,  $\text{DMSO-}d_6$ ) spectra of compound **4b**

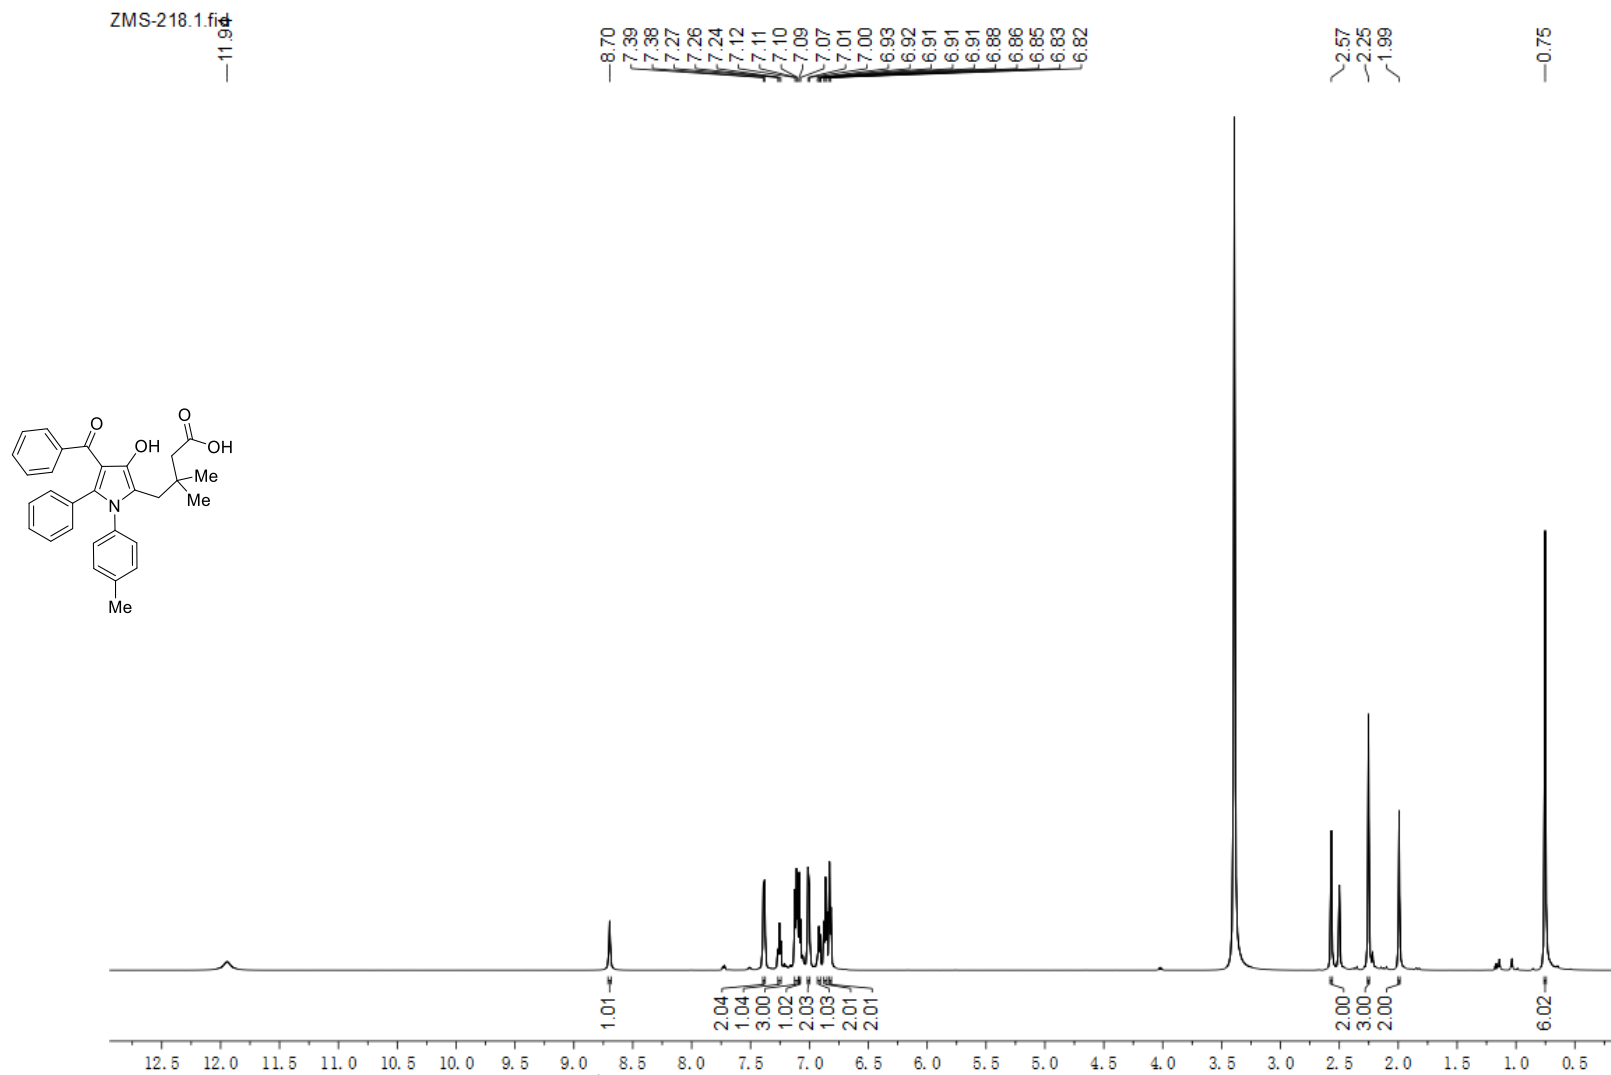

**Figure S82.**  $^1\text{H}$  NMR (600 MHz,  $\text{DMSO-}d_6$ ) spectra of compound **4c**

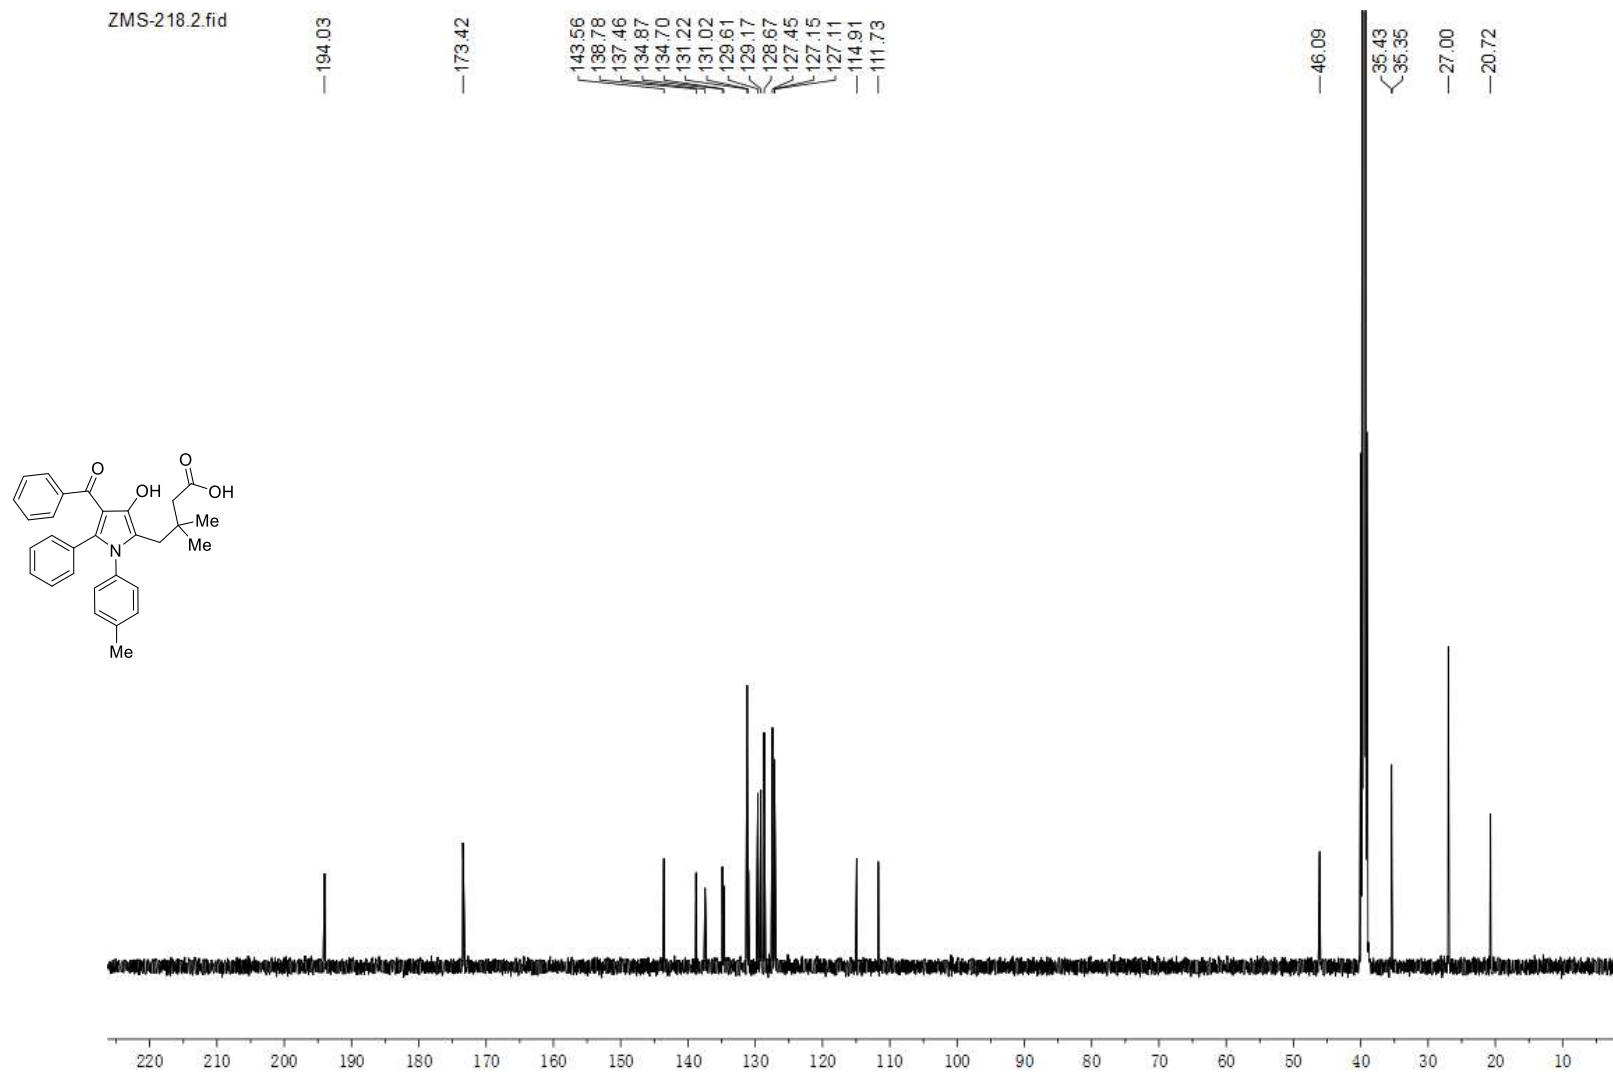

Figure S83.  $^{13}\text{C}$  NMR (150 MHz,  $\text{DMSO-}d_6$ ) spectra of compound **4c**

## 7. References and notes.

1. (a) Liu, Y.; Zhou, R.; Wan, J.-P. *Synth. Commun.*, **2013**, *43*, 2475. (b) Zhou, Z.-Z.; Liu, F.-S.; Shen, D.-S.; Tan, C.; Luo, L.-Y. *Inorg. Chem. Commun.*, **2011**, *14*, 659. (c) Larina, N. A.; Lokshin, V.; Berthet, J.; Delbaere, S.; Vermeersch, G.; Khodorkovsky, V. *Tetrahedron*, **2010**, *66*, 8291. (d) Zhou, P.; Hu, B.; Rao, K.; Li, L.; Yang, J.; Gao, C.; Wang, F.; Yu, F. *Synlett*, **2018**, *29*, 519.
2. (a) Mayakrishnan, S.; Tamizmani, M.; Maheswari, N. U. *Chem. Commun.*, **2020**, *56*, 15462. (b) Yang, L.; Pi, C.; Wu, Y.; Cui, X. *Org. Lett.*, **2022**, *24*, 7502.
3. CCDC 2215066 contain the supplementary crystallographic data for compound **3i**. These data can be obtained free of charge from The Cambridge Crystallographic Data Center via [www.ccdc.cam.ac.uk/data\\_request/cif](http://www.ccdc.cam.ac.uk/data_request/cif).
